# Supplementary material
Source: publisher figshare collection journal article supplement (https://acs.figshare.com/ndownloader/files/3742225)
Supplement: Supplementary file 1 [file 3742225]

data_1 
_audit_creation_date        "2013-05-08"
_audit_creation_method CRYSTALS_ver_14.52

_oxford_structure_analysis_title  'bw_178_0m in P2(1)/c'
_chemical_name_systematic         ?
_chemical_melting_point           ?

_cell_length_a                    16.8643(8)
_cell_length_b                    14.5180(7)
_cell_length_c                    17.9633(10)
_cell_angle_alpha                 90
_cell_angle_beta                  96.497(3)
_cell_angle_gamma                 90
_cell_volume                      4369.8(4)
 
_symmetry_cell_setting            'monoclinic' 
_symmetry_space_group_name_H-M    'P 1 21/c 1 ' 
_symmetry_space_group_name_Hall   '-P 2ybc ' 
loop_
 _symmetry_equiv_pos_as_xyz
 'x,y,z'
 '-x,-y,-z'
 '-x,y+1/2,-z+1/2'
 'x,-y+1/2,z+1/2'

loop_
_atom_type_symbol
_atom_type_scat_dispersion_real
_atom_type_scat_dispersion_imag
_atom_type_scat_Cromer_Mann_a1
_atom_type_scat_Cromer_Mann_b1
_atom_type_scat_Cromer_Mann_a2
_atom_type_scat_Cromer_Mann_b2
_atom_type_scat_Cromer_Mann_a3
_atom_type_scat_Cromer_Mann_b3
_atom_type_scat_Cromer_Mann_a4
_atom_type_scat_Cromer_Mann_b4
_atom_type_scat_Cromer_Mann_c
_atom_type_scat_source  
 C       0.0033   0.0016   2.3100  20.8439   1.0200  10.2075   1.5886   0.5687
   0.8650  51.6512   0.2156 'International Tables Vol C 4.2.6.8 and 6.1.1.4'
 H       0.0000   0.0000   0.4930  10.5109   0.3229  26.1257   0.1402   3.1424
   0.0408  57.7998   0.0030 'International Tables Vol C 4.2.6.8 and 6.1.1.4'
 N       0.0061   0.0033  12.2126   0.0057   3.1322   9.8933   2.0125  28.9975
   1.1663   0.5826 -11.5290 'International Tables Vol C 4.2.6.8 and 6.1.1.4'
 P       0.1023   0.0942   6.4345   1.9067   4.1791  27.1570   1.7800   0.5260
   1.4908  68.1645   1.1149 'International Tables Vol C 4.2.6.8 and 6.1.1.4'
 Cl      0.1484   0.1585  11.4604   0.0104   7.1964   1.1662   6.2556  18.5194
   1.6455  47.7784  -9.5574 'International Tables Vol C 4.2.6.8 and 6.1.1.4'
 Ti      0.2776   0.4457   9.7595   7.8508   7.3558   0.5000   1.6991  35.6338
   1.9021 116.1050   1.2807 'International Tables Vol C 4.2.6.8 and 6.1.1.4'
 
 
_cell_formula_units_Z                    4

# Given Formula = C42 H69 Cl1 N3 P3 Ti1 
# Dc =      1.20 Fooo =   1704.00 Mu =      3.98 M =    792.30
# Found Formula = C42 H69 Cl1 N3 P3 Ti1 
# Dc =      1.20 FOOO =   1704.00 Mu =      3.98 M =    792.30

_chemical_formula_sum             'C42 H69 Cl1 N3 P3 Ti1'
_chemical_formula_moiety          'C42 H69 Cl1 N3 P3 Ti1'
_chemical_compound_source                ?
_chemical_formula_weight            792.30
 
 
_cell_measurement_reflns_used         9628
_cell_measurement_theta_min              3
_cell_measurement_theta_max             30
_cell_measurement_temperature          120
 
_exptl_crystal_description        'prism' 
_exptl_crystal_colour             'yellow' 
_exptl_crystal_size_min           0.180 
_exptl_crystal_size_mid           0.280 
_exptl_crystal_size_max           0.310 
 
_exptl_crystal_density_diffrn     1.204 
_exptl_crystal_density_meas       ? 
_exptl_crystal_density_method     'not measured' 
# Non-dispersive F(000): 
_exptl_crystal_F_000              1704 
_exptl_absorpt_coefficient_mu     0.398 
 
# Sheldrick geometric approximatio 0.89 0.93 
_exptl_absorpt_correction_type    numerical 
_exptl_absorpt_process_details 
; 
 Analytical Absorption (De Meulenaer & Tompa, 1965) 
; 
_exptl_absorpt_correction_T_min   0.89 
_exptl_absorpt_correction_T_max   0.93 
_diffrn_measurement_device_type   'Bruker Kappa Apex2' 
_diffrn_measurement_device        'Area' 
_diffrn_radiation_monochromator   'graphite' 
_diffrn_radiation_type            'Mo K\a'
_diffrn_radiation_wavelength           0.71073
_diffrn_measurement_method        '\f & \w scans' 
 
# If a reference occurs more than once, delete the author 
# and date from subsequent references. 
_computing_data_collection        'Apex2 (Bruker AXS, 2006)' 
_computing_cell_refinement        'Apex2 (Bruker AXS, 2006)' 
_computing_data_reduction         'Apex2 (Bruker AXS, 2006)' 
_computing_structure_solution     'SIR92 (Altomare et al., 1994)' 
_computing_structure_refinement   'CRYSTALS (Betteridge et al., 2003)' 
_computing_publication_material   'CRYSTALS (Betteridge et al., 2003)' 
_computing_molecular_graphics     'CAMERON (Watkin et al., 1996)' 
 
_diffrn_standards_interval_time   . 
_diffrn_standards_interval_count  . 
_diffrn_standards_number          0 
_diffrn_standards_decay_%         ? 
 
_diffrn_ambient_temperature        120
_diffrn_reflns_number             80045 
_reflns_number_total              12757 
_diffrn_reflns_av_R_equivalents   0.047 
# Number of reflections without Friedels Law is 0 
# Number of reflections with Friedels Law is 12757 
# Theoretical number of reflections is about 25568 
 
 
_diffrn_reflns_theta_min          1.808 
_diffrn_reflns_theta_max          30.033 
_diffrn_measured_fraction_theta_max 0.996 
 
_diffrn_reflns_theta_full         30.033 
_diffrn_measured_fraction_theta_full 0.996 
 
 
_diffrn_reflns_limit_h_min        -23 
_diffrn_reflns_limit_h_max        20 
_diffrn_reflns_limit_k_min        -17 
_diffrn_reflns_limit_k_max        20 
_diffrn_reflns_limit_l_min        -25 
_diffrn_reflns_limit_l_max        25 
_reflns_limit_h_min               -23 
_reflns_limit_h_max               23 
_reflns_limit_k_min               0 
_reflns_limit_k_max               20 
_reflns_limit_l_min               0 
_reflns_limit_l_max               25 
 
_oxford_diffrn_Wilson_B_factor    0.00 
_oxford_diffrn_Wilson_scale       0.00 
 
_atom_sites_solution_primary      direct #heavy,direct,difmap,geom
# _atom_sites_solution_secondary  difmap
_atom_sites_solution_hydrogens    difmap
 
_refine_diff_density_min          -0.38 
_refine_diff_density_max          0.58 
 
 
# The current dictionary definitions do not cover the 
# situation where the reflections used for refinement were 
# selected by a user-defined sigma threshold 
 
 
# The values actually used during refinement 
_oxford_reflns_threshold_expression_ref     I>-10.0\s(I)
_refine_ls_number_reflns          12757 
_refine_ls_number_restraints      0 
_refine_ls_number_parameters      451 
_oxford_refine_ls_R_factor_ref    0.0433 
_refine_ls_wR_factor_ref          0.0865 
_refine_ls_goodness_of_fit_ref    1.0306 
_refine_ls_shift/su_max           0.0010712 
_refine_ls_shift/su_mean          0.0001485 
 
 
# The values computed with all filters except I/sigma 
_oxford_reflns_number_all         12757 
_refine_ls_R_factor_all           0.0433 
_refine_ls_wR_factor_all          0.0865 
 
# The values computed with a 2 sigma cutoff - a la SHELX 
_reflns_threshold_expression      I>2.0\s(I)
_reflns_number_gt                 10433 
_refine_ls_R_factor_gt            0.0321 
_refine_ls_wR_factor_gt           0.0750 
 
# choose from: rm (reference molecule of known chirality), 
# ad (anomolous dispersion - Flack), rmad (rm and ad), 
# syn (from synthesis), unk (unknown) or . (not applicable). 
_chemical_absolute_configuration  '.' 
 
 
_refine_ls_structure_factor_coef  Fsqd 
_refine_ls_matrix_type            full
_refine_ls_hydrogen_treatment     constr         #undef, noref, refall,
                                                 # refxyz, refU, constr or mixed
_refine_ls_weighting_scheme       calc 
_refine_ls_weighting_details 
;
 Method= Modified Sheldrick 
 w=1/[\s^2^(F^2^) + ( 0.04P)^2^ + 2.29P] 
 ,where P=(max(Fo^2^,0) + 2Fc^2^)/3 
;
# Insert your own references if required - in alphabetical order 
_publ_section_references 
; 
Altomare, A., Cascarano, G., Giacovazzo, C., Guagliardi, A., Burla, M.C., 
Polidori, G. & Camalli, M. (1994). J. Appl. Cryst. 27, 435. 
 
Betteridge, P.W., Carruthers, J.R., Cooper, R.I., 
Prout, K. & Watkin, D.J. (2003). J. Appl. Cryst. 36, 1487. 
 
Bruker Analytical X-ray Systems, Inc., 2006. <i>Apex2</i>, 
Version 2 User Manual, M86-E01078, Madison, WI. 
 
De Meulenaer, J. & Tompa, H. (1965). Acta Cryst. 19, 1014. 
 
Watkin, D.J., Prout, C.K. & Pearce, L.J. (1996). CAMERON, Chemical 
Crystallography Laboratory, Oxford, UK. 
; 

# Uequiv = arithmetic mean of Ui i.e. Ueqiv = (U1+U2+U3)/3

# Replace last . with number of unfound hydrogen atoms attached to an atom.

# ..._refinement_flags_... 
# . no refinement constraints           S special position constraint on site
# G rigid group refinement of site      R riding atom
# D distance or angle restraint on site T thermal displacement constraints
# U Uiso or Uij restraint (rigid bond)  P partial occupancy constraint


loop_
_atom_site_label
_atom_site_type_symbol
_atom_site_fract_x
_atom_site_fract_y
_atom_site_fract_z
_atom_site_U_iso_or_equiv
_atom_site_occupancy
_atom_site_adp_type
_atom_site_refinement_flags_posn
_atom_site_refinement_flags_adp
_atom_site_refinement_flags_occupancy
_atom_site_disorder_assembly
_atom_site_disorder_group
_atom_site_attached_hydrogens
Ti1 Ti 0.203389(13) 0.490686(15) 0.188571(12) 0.0102 1.0000 Uani . . . . . . 
Cl1 Cl 0.141776(19) 0.61319(2) 0.116758(18) 0.0174 1.0000 Uani . . . . . . 
P1 P 0.069730(19) 0.46063(2) 0.239751(18) 0.0118 1.0000 Uani . . . . . . 
P2 P 0.170526(19) 0.36787(2) 0.093563(17) 0.0117 1.0000 Uani . . . . . . 
P3 P 0.338319(19) 0.53895(2) 0.155908(18) 0.0132 1.0000 Uani . . . . . . 
N1 N 0.15180(6) 0.51209(8) 0.28027(6) 0.0123 1.0000 Uani . . . . . . 
N2 N 0.23124(6) 0.35624(7) 0.17236(6) 0.0123 1.0000 Uani . . . . . . 
N3 N 0.30793(6) 0.53605(8) 0.24078(6) 0.0128 1.0000 Uani . . . . . . 
C1 C 0.15740(7) 0.57784(9) 0.33901(7) 0.0138 1.0000 Uani . . . . . . 
C2 C 0.13785(8) 0.55574(10) 0.41067(7) 0.0176 1.0000 Uani . . . . . . 
C3 C 0.14628(8) 0.62113(11) 0.46786(8) 0.0205 1.0000 Uani . . . . . . 
C4 C 0.12464(10) 0.59754(14) 0.54482(8) 0.0318 1.0000 Uani . . . . . . 
C5 C 0.17594(8) 0.70786(11) 0.45353(8) 0.0216 1.0000 Uani . . . . . . 
C6 C 0.19656(8) 0.73085(10) 0.38270(8) 0.0190 1.0000 Uani . . . . . . 
C7 C 0.23209(11) 0.82293(11) 0.36754(9) 0.0294 1.0000 Uani . . . . . . 
C8 C 0.18554(8) 0.66540(9) 0.32558(7) 0.0156 1.0000 Uani . . . . . . 
C9 C -0.00984(8) 0.54923(9) 0.23006(7) 0.0161 1.0000 Uani . . . . . . 
C10 C -0.05223(9) 0.56385(12) 0.29981(9) 0.0246 1.0000 Uani . . . . . . 
C11 C -0.06928(9) 0.53411(11) 0.16037(8) 0.0236 1.0000 Uani . . . . . . 
C12 C 0.03841(8) 0.37040(9) 0.30345(7) 0.0160 1.0000 Uani . . . . . . 
C13 C 0.10726(9) 0.30381(10) 0.32426(8) 0.0211 1.0000 Uani . . . . . . 
C14 C -0.03571(9) 0.31976(11) 0.26815(8) 0.0225 1.0000 Uani . . . . . . 
C15 C 0.27239(7) 0.28517(9) 0.21287(7) 0.0129 1.0000 Uani . . . . . . 
C16 C 0.26060(8) 0.19135(9) 0.19688(7) 0.0157 1.0000 Uani . . . . . . 
C17 C 0.30134(8) 0.12379(10) 0.24113(8) 0.0177 1.0000 Uani . . . . . . 
C18 C 0.28633(10) 0.02317(11) 0.22414(10) 0.0288 1.0000 Uani . . . . . . 
C19 C 0.35576(8) 0.15040(10) 0.30140(8) 0.0184 1.0000 Uani . . . . . . 
C20 C 0.36996(8) 0.24296(10) 0.31758(7) 0.0159 1.0000 Uani . . . . . . 
C21 C 0.43125(9) 0.27343(11) 0.38062(8) 0.0216 1.0000 Uani . . . . . . 
C22 C 0.32758(7) 0.30940(9) 0.27381(7) 0.0143 1.0000 Uani . . . . . . 
C23 C 0.08272(8) 0.29024(10) 0.08404(7) 0.0174 1.0000 Uani . . . . . . 
C24 C 0.08984(10) 0.19695(10) 0.04557(8) 0.0237 1.0000 Uani . . . . . . 
C25 C 0.01347(9) 0.34416(12) 0.04204(10) 0.0303 1.0000 Uani . . . . . . 
C26 C 0.21568(8) 0.34932(10) 0.00542(7) 0.0162 1.0000 Uani . . . . . . 
C27 C 0.28213(11) 0.27824(13) 0.01157(10) 0.0346 1.0000 Uani . . . . . . 
C28 C 0.24221(9) 0.44050(11) -0.02629(8) 0.0233 1.0000 Uani . . . . . . 
C29 C 0.35061(7) 0.55667(9) 0.31111(7) 0.0133 1.0000 Uani . . . . . . 
C30 C 0.41535(8) 0.61727(10) 0.31786(8) 0.0174 1.0000 Uani . . . . . . 
C31 C 0.45707(8) 0.63768(10) 0.38708(8) 0.0201 1.0000 Uani . . . . . . 
C32 C 0.52730(10) 0.70195(12) 0.39098(10) 0.0300 1.0000 Uani . . . . . . 
C33 C 0.43323(9) 0.59721(10) 0.45109(8) 0.0207 1.0000 Uani . . . . . . 
C34 C 0.36897(8) 0.53677(10) 0.44646(8) 0.0183 1.0000 Uani . . . . . . 
C35 C 0.34245(10) 0.49547(13) 0.51627(8) 0.0285 1.0000 Uani . . . . . . 
C36 C 0.32848(8) 0.51592(9) 0.37623(7) 0.0151 1.0000 Uani . . . . . . 
C37 C 0.42271(8) 0.45651(10) 0.15263(7) 0.0172 1.0000 Uani . . . . . . 
C38 C 0.48638(8) 0.45734(11) 0.22060(8) 0.0227 1.0000 Uani . . . . . . 
C39 C 0.46255(9) 0.46598(12) 0.08067(8) 0.0252 1.0000 Uani . . . . . . 
C40 C 0.37350(8) 0.65495(10) 0.13010(8) 0.0188 1.0000 Uani . . . . . . 
C41 C 0.32859(9) 0.73255(10) 0.16533(9) 0.0243 1.0000 Uani . . . . . . 
C42 C 0.36225(10) 0.66572(12) 0.04454(8) 0.0269 1.0000 Uani . . . . . . 
H21 H 0.1210 0.4957 0.4199 0.0216 1.0000 Uiso R . . . . . 
H41 H 0.1043 0.6498 0.5682 0.0501 1.0000 Uiso R . . . . . 
H42 H 0.1669 0.5742 0.5758 0.0506 1.0000 Uiso R . . . . . 
H43 H 0.0816 0.5552 0.5428 0.0491 1.0000 Uiso R . . . . . 
H51 H 0.1808 0.7524 0.4927 0.0274 1.0000 Uiso R . . . . . 
H71 H 0.2169 0.8417 0.3161 0.0430 1.0000 Uiso R . . . . . 
H72 H 0.2134 0.8690 0.3994 0.0449 1.0000 Uiso R . . . . . 
H73 H 0.2891 0.8201 0.3764 0.0449 1.0000 Uiso R . . . . . 
H81 H 0.1985 0.6811 0.2775 0.0186 1.0000 Uiso R . . . . . 
H91 H 0.0181 0.6034 0.2221 0.0181 1.0000 Uiso R . . . . . 
H101 H -0.0160 0.5777 0.3426 0.0374 1.0000 Uiso R . . . . . 
H102 H -0.0899 0.6150 0.2910 0.0358 1.0000 Uiso R . . . . . 
H103 H -0.0820 0.5104 0.3108 0.0367 1.0000 Uiso R . . . . . 
H111 H -0.0425 0.5350 0.1158 0.0350 1.0000 Uiso R . . . . . 
H112 H -0.1101 0.5824 0.1581 0.0347 1.0000 Uiso R . . . . . 
H113 H -0.0957 0.4766 0.1626 0.0340 1.0000 Uiso R . . . . . 
H121 H 0.0257 0.3997 0.3502 0.0188 1.0000 Uiso R . . . . . 
H131 H 0.1537 0.3352 0.3475 0.0312 1.0000 Uiso R . . . . . 
H132 H 0.0913 0.2566 0.3575 0.0304 1.0000 Uiso R . . . . . 
H133 H 0.1216 0.2724 0.2809 0.0313 1.0000 Uiso R . . . . . 
H141 H -0.0796 0.3609 0.2574 0.0329 1.0000 Uiso R . . . . . 
H142 H -0.0524 0.2750 0.3025 0.0329 1.0000 Uiso R . . . . . 
H143 H -0.0262 0.2893 0.2221 0.0341 1.0000 Uiso R . . . . . 
H161 H 0.2241 0.1739 0.1560 0.0184 1.0000 Uiso R . . . . . 
H181 H 0.2831 -0.0106 0.2663 0.0471 1.0000 Uiso R . . . . . 
H182 H 0.3296 -0.0022 0.2027 0.0458 1.0000 Uiso R . . . . . 
H183 H 0.2406 0.0133 0.1916 0.0463 1.0000 Uiso R . . . . . 
H191 H 0.3818 0.1048 0.3315 0.0233 1.0000 Uiso R . . . . . 
H211 H 0.4127 0.3245 0.4080 0.0322 1.0000 Uiso R . . . . . 
H212 H 0.4804 0.2910 0.3610 0.0325 1.0000 Uiso R . . . . . 
H213 H 0.4431 0.2250 0.4158 0.0321 1.0000 Uiso R . . . . . 
H221 H 0.3368 0.3713 0.2850 0.0180 1.0000 Uiso R . . . . . 
H231 H 0.0705 0.2802 0.1351 0.0216 1.0000 Uiso R . . . . . 
H241 H 0.1314 0.1574 0.0705 0.0350 1.0000 Uiso R . . . . . 
H242 H 0.1001 0.2045 -0.0058 0.0341 1.0000 Uiso R . . . . . 
H243 H 0.0400 0.1641 0.0449 0.0346 1.0000 Uiso R . . . . . 
H251 H 0.0070 0.4031 0.0637 0.0450 1.0000 Uiso R . . . . . 
H252 H 0.0216 0.3531 -0.0092 0.0456 1.0000 Uiso R . . . . . 
H253 H -0.0348 0.3098 0.0409 0.0450 1.0000 Uiso R . . . . . 
H261 H 0.1711 0.3271 -0.0299 0.0189 1.0000 Uiso R . . . . . 
H271 H 0.2629 0.2194 0.0269 0.0498 1.0000 Uiso R . . . . . 
H272 H 0.3266 0.2989 0.0474 0.0512 1.0000 Uiso R . . . . . 
H273 H 0.3000 0.2694 -0.0367 0.0509 1.0000 Uiso R . . . . . 
H281 H 0.1986 0.4845 -0.0305 0.0347 1.0000 Uiso R . . . . . 
H282 H 0.2859 0.4670 0.0056 0.0338 1.0000 Uiso R . . . . . 
H283 H 0.2590 0.4303 -0.0750 0.0339 1.0000 Uiso R . . . . . 
H301 H 0.4324 0.6453 0.2750 0.0214 1.0000 Uiso R . . . . . 
H321 H 0.5430 0.7222 0.4392 0.0465 1.0000 Uiso R . . . . . 
H322 H 0.5168 0.7544 0.3605 0.0459 1.0000 Uiso R . . . . . 
H323 H 0.5724 0.6731 0.3738 0.0469 1.0000 Uiso R . . . . . 
H331 H 0.4608 0.6105 0.4991 0.0246 1.0000 Uiso R . . . . . 
H351 H 0.3125 0.4433 0.5068 0.0459 1.0000 Uiso R . . . . . 
H352 H 0.3103 0.5388 0.5394 0.0454 1.0000 Uiso R . . . . . 
H353 H 0.3853 0.4811 0.5505 0.0442 1.0000 Uiso R . . . . . 
H361 H 0.2861 0.4749 0.3729 0.0183 1.0000 Uiso R . . . . . 
H371 H 0.3961 0.3962 0.1510 0.0193 1.0000 Uiso R . . . . . 
H381 H 0.4629 0.4457 0.2665 0.0322 1.0000 Uiso R . . . . . 
H382 H 0.5145 0.5147 0.2250 0.0333 1.0000 Uiso R . . . . . 
H383 H 0.5253 0.4104 0.2160 0.0351 1.0000 Uiso R . . . . . 
H391 H 0.4240 0.4601 0.0369 0.0383 1.0000 Uiso R . . . . . 
H392 H 0.4887 0.5248 0.0796 0.0366 1.0000 Uiso R . . . . . 
H393 H 0.5010 0.4174 0.0786 0.0384 1.0000 Uiso R . . . . . 
H401 H 0.4307 0.6571 0.1490 0.0222 1.0000 Uiso R . . . . . 
H411 H 0.3325 0.7286 0.2187 0.0365 1.0000 Uiso R . . . . . 
H412 H 0.3514 0.7903 0.1518 0.0363 1.0000 Uiso R . . . . . 
H413 H 0.2733 0.7319 0.1463 0.0367 1.0000 Uiso R . . . . . 
H421 H 0.3928 0.6210 0.0208 0.0394 1.0000 Uiso R . . . . . 
H422 H 0.3790 0.7258 0.0309 0.0397 1.0000 Uiso R . . . . . 
H423 H 0.3067 0.6584 0.0262 0.0388 1.0000 Uiso R . . . . . 
loop_
_atom_site_aniso_label
_atom_site_aniso_U_11
_atom_site_aniso_U_22
_atom_site_aniso_U_33
_atom_site_aniso_U_23
_atom_site_aniso_U_13
_atom_site_aniso_U_12
Ti1 0.01001(10) 0.01060(10) 0.01009(10) -0.00005(8) 0.00111(7) -0.00084(8) 
Cl1 0.01745(14) 0.01550(15) 0.01881(15) 0.00494(12) 0.00070(11) 0.00151(12) 
P1 0.01143(14) 0.01138(15) 0.01295(14) -0.00015(12) 0.00264(11) -0.00070(12) 
P2 0.01245(14) 0.01236(15) 0.01012(14) -0.00015(11) 0.00078(11) -0.00061(12) 
P3 0.01153(14) 0.01542(16) 0.01270(14) 0.00108(12) 0.00224(11) -0.00180(12) 
N1 0.0118(5) 0.0125(5) 0.0128(5) -0.0022(4) 0.0019(4) -0.0012(4) 
N2 0.0134(5) 0.0119(5) 0.0111(5) -0.0002(4) -0.0005(4) 0.0003(4) 
N3 0.0126(5) 0.0144(5) 0.0114(5) -0.0001(4) 0.0011(4) -0.0020(4) 
C1 0.0114(5) 0.0158(6) 0.0139(6) -0.0025(5) 0.0005(4) 0.0014(5) 
C2 0.0168(6) 0.0207(7) 0.0155(6) -0.0007(5) 0.0033(5) -0.0007(5) 
C3 0.0178(6) 0.0296(8) 0.0141(6) -0.0037(5) 0.0021(5) 0.0033(6) 
C4 0.0332(8) 0.0481(11) 0.0152(7) -0.0055(7) 0.0074(6) 0.0003(8) 
C5 0.0196(6) 0.0243(7) 0.0198(6) -0.0101(6) -0.0024(5) 0.0050(6) 
C6 0.0178(6) 0.0170(6) 0.0209(6) -0.0044(5) -0.0032(5) 0.0040(5) 
C7 0.0403(9) 0.0159(7) 0.0297(8) -0.0035(6) -0.0067(7) -0.0021(7) 
C8 0.0157(6) 0.0153(6) 0.0155(6) -0.0007(5) 0.0002(5) 0.0024(5) 
C9 0.0142(6) 0.0136(6) 0.0206(6) 0.0007(5) 0.0029(5) 0.0018(5) 
C10 0.0201(7) 0.0296(8) 0.0249(7) -0.0023(6) 0.0062(6) 0.0100(6) 
C11 0.0211(7) 0.0234(7) 0.0252(7) 0.0019(6) -0.0029(6) 0.0026(6) 
C12 0.0186(6) 0.0138(6) 0.0163(6) 0.0009(5) 0.0054(5) -0.0022(5) 
C13 0.0263(7) 0.0170(7) 0.0205(6) 0.0049(5) 0.0046(5) 0.0022(6) 
C14 0.0218(7) 0.0206(7) 0.0255(7) 0.0006(6) 0.0046(5) -0.0078(6) 
C15 0.0127(5) 0.0140(6) 0.0125(5) 0.0010(5) 0.0036(4) 0.0015(5) 
C16 0.0164(6) 0.0152(6) 0.0155(6) -0.0004(5) 0.0017(5) -0.0005(5) 
C17 0.0190(6) 0.0148(6) 0.0199(6) 0.0016(5) 0.0045(5) 0.0013(5) 
C18 0.0336(8) 0.0150(7) 0.0362(9) 0.0012(6) -0.0027(7) 0.0018(6) 
C19 0.0192(6) 0.0185(7) 0.0177(6) 0.0040(5) 0.0028(5) 0.0062(5) 
C20 0.0142(6) 0.0204(7) 0.0132(6) 0.0010(5) 0.0024(4) 0.0034(5) 
C21 0.0198(6) 0.0249(7) 0.0188(6) -0.0003(5) -0.0036(5) 0.0059(6) 
C22 0.0135(5) 0.0148(6) 0.0146(6) -0.0008(5) 0.0017(4) 0.0015(5) 
C23 0.0178(6) 0.0202(7) 0.0139(6) -0.0009(5) 0.0009(5) -0.0056(5) 
C24 0.0316(8) 0.0199(7) 0.0185(6) -0.0007(5) -0.0023(6) -0.0095(6) 
C25 0.0169(7) 0.0344(9) 0.0374(9) -0.0039(7) -0.0064(6) -0.0028(6) 
C26 0.0187(6) 0.0193(6) 0.0109(5) -0.0008(5) 0.0028(5) -0.0004(5) 
C27 0.0420(10) 0.0376(10) 0.0274(8) 0.0065(7) 0.0176(7) 0.0191(8) 
C28 0.0268(7) 0.0284(8) 0.0155(6) 0.0025(6) 0.0052(5) -0.0074(6) 
C29 0.0121(5) 0.0136(6) 0.0137(6) -0.0019(5) -0.0005(4) 0.0002(5) 
C30 0.0176(6) 0.0168(6) 0.0175(6) -0.0002(5) 0.0004(5) -0.0035(5) 
C31 0.0182(6) 0.0180(7) 0.0225(7) -0.0035(5) -0.0042(5) -0.0019(5) 
C32 0.0260(8) 0.0297(8) 0.0320(8) -0.0023(7) -0.0073(6) -0.0118(7) 
C33 0.0225(7) 0.0213(7) 0.0166(6) -0.0048(5) -0.0052(5) 0.0026(6) 
C34 0.0200(6) 0.0195(7) 0.0147(6) -0.0003(5) -0.0003(5) 0.0044(5) 
C35 0.0296(8) 0.0397(10) 0.0154(6) 0.0047(6) -0.0001(6) 0.0000(7) 
C36 0.0150(6) 0.0151(6) 0.0151(6) -0.0008(5) 0.0011(5) 0.0007(5) 
C37 0.0147(6) 0.0193(7) 0.0182(6) 0.0002(5) 0.0050(5) 0.0003(5) 
C38 0.0155(6) 0.0283(8) 0.0243(7) 0.0004(6) 0.0025(5) 0.0023(6) 
C39 0.0215(7) 0.0330(8) 0.0229(7) 0.0002(6) 0.0102(6) 0.0023(6) 
C40 0.0172(6) 0.0190(7) 0.0201(6) 0.0058(5) 0.0017(5) -0.0046(5) 
C41 0.0250(7) 0.0164(7) 0.0316(8) 0.0029(6) 0.0029(6) -0.0036(6) 
C42 0.0302(8) 0.0300(8) 0.0205(7) 0.0099(6) 0.0031(6) -0.0031(7) 

_refine_ls_extinction_method 
    'None'
_oxford_refine_ls_scale 0.083741(11) 
loop_
 _geom_bond_atom_site_label_1
 _geom_bond_site_symmetry_1
 _geom_bond_atom_site_label_2
 _geom_bond_site_symmetry_2
 _geom_bond_distance
 _geom_bond_publ_flag
Ti1 . Cl1 . 2.3672(4)    yes
Ti1 . P1 . 2.5662(4)    yes
Ti1 . P2 . 2.4870(4)    yes
Ti1 . P3 . 2.5130(4)    yes
Ti1 . N1 . 1.9726(11)    yes
Ti1 . N2 . 2.0362(11)    yes
Ti1 . N3 . 2.0118(11)    yes
P1 . N1 . 1.6660(11)    yes
P1 . C9 . 1.8527(13)    yes
P1 . C12 . 1.8550(13)    yes
P2 . N2 . 1.6590(11)    yes
P2 . C23 . 1.8534(14)    yes
P2 . C26 . 1.8526(13)    yes
P3 . N3 . 1.6631(11)    yes
P3 . C37 . 1.8656(14)    yes
P3 . C40 . 1.8616(14)    yes
N1 . C1 . 1.4181(16)    yes
N2 . C15 . 1.4006(16)    yes
N3 . C29 . 1.4135(16)    yes
C1 . C2 . 1.4016(18)    yes
C1 . C8 . 1.3876(19)    yes
C2 . C3 . 1.3943(19)    yes
C2 . H21 . 0.937    no
C3 . C4 . 1.509(2)    yes
C3 . C5 . 1.390(2)    yes
C4 . H41 . 0.950    no
C4 . H42 . 0.918    no
C4 . H43 . 0.949    no
C5 . C6 . 1.397(2)    yes
C5 . H51 . 0.952    no
C6 . C7 . 1.502(2)    yes
C6 . C8 . 1.3954(19)    yes
C7 . H71 . 0.970    no
C7 . H72 . 0.956    no
C7 . H73 . 0.957    no
C8 . H81 . 0.942    no
C9 . C10 . 1.5259(19)    yes
C9 . C11 . 1.5285(19)    yes
C9 . H91 . 0.936    no
C10 . H101 . 0.948    no
C10 . H102 . 0.979    no
C10 . H103 . 0.957    no
C11 . H111 . 0.963    no
C11 . H112 . 0.980    no
C11 . H113 . 0.950    no
C12 . C13 . 1.5246(19)    yes
C12 . C14 . 1.5250(19)    yes
C12 . H121 . 0.987    no
C13 . H131 . 0.961    no
C13 . H132 . 0.966    no
C13 . H133 . 0.956    no
C14 . H141 . 0.954    no
C14 . H142 . 0.960    no
C14 . H143 . 0.968    no
C15 . C16 . 1.4015(18)    yes
C15 . C22 . 1.3992(17)    yes
C16 . C17 . 1.3937(19)    yes
C16 . H161 . 0.939    no
C17 . C18 . 1.508(2)    yes
C17 . C19 . 1.392(2)    yes
C18 . H181 . 0.910    no
C18 . H182 . 0.938    no
C18 . H183 . 0.925    no
C19 . C20 . 1.390(2)    yes
C19 . H191 . 0.932    no
C20 . C21 . 1.5105(19)    yes
C20 . C22 . 1.3901(18)    yes
C21 . H211 . 0.961    no
C21 . H212 . 0.971    no
C21 . H213 . 0.951    no
C22 . H221 . 0.930    no
C23 . C24 . 1.531(2)    yes
C23 . C25 . 1.532(2)    yes
C23 . H231 . 0.973    no
C24 . H241 . 0.975    no
C24 . H242 . 0.965    no
C24 . H243 . 0.965    no
C25 . H251 . 0.952    no
C25 . H252 . 0.955    no
C25 . H253 . 0.953    no
C26 . C27 . 1.518(2)    yes
C26 . C28 . 1.528(2)    yes
C26 . H261 . 0.981    no
C27 . H271 . 0.965    no
C27 . H272 . 0.979    no
C27 . H273 . 0.959    no
C28 . H281 . 0.970    no
C28 . H282 . 0.961    no
C28 . H283 . 0.962    no
C29 . C30 . 1.3968(18)    yes
C29 . C36 . 1.3988(18)    yes
C30 . C31 . 1.3896(19)    yes
C30 . H301 . 0.944    no
C31 . C32 . 1.503(2)    yes
C31 . C33 . 1.391(2)    yes
C32 . H321 . 0.925    no
C32 . H322 . 0.943    no
C32 . H323 . 0.950    no
C33 . C34 . 1.390(2)    yes
C33 . H331 . 0.952    no
C34 . C35 . 1.503(2)    yes
C34 . C36 . 1.3981(18)    yes
C35 . H351 . 0.916    no
C35 . H352 . 0.956    no
C35 . H353 . 0.918    no
C36 . H361 . 0.927    no
C37 . C38 . 1.5320(19)    yes
C37 . C39 . 1.5290(19)    yes
C37 . H371 . 0.982    no
C38 . H381 . 0.968    no
C38 . H382 . 0.956    no
C38 . H383 . 0.955    no
C39 . H391 . 0.966    no
C39 . H392 . 0.962    no
C39 . H393 . 0.961    no
C40 . C41 . 1.534(2)    yes
C40 . C42 . 1.535(2)    yes
C40 . H401 . 0.986    no
C41 . H411 . 0.955    no
C41 . H412 . 0.965    no
C41 . H413 . 0.956    no
C42 . H421 . 0.958    no
C42 . H422 . 0.958    no
C42 . H423 . 0.963    no
loop_
 _geom_angle_atom_site_label_1
 _geom_angle_site_symmetry_1
 _geom_angle_atom_site_label_2
 _geom_angle_site_symmetry_2
 _geom_angle_atom_site_label_3
 _geom_angle_site_symmetry_3
 _geom_angle
 _geom_angle_publ_flag
Cl1 . Ti1 . P1 . 88.499(14)    yes
Cl1 . Ti1 . P2 . 96.588(14)    yes
P1 . Ti1 . P2 . 89.276(13)    yes
Cl1 . Ti1 . P3 . 90.946(14)    yes
P1 . Ti1 . P3 . 170.510(14)    yes
P2 . Ti1 . P3 . 100.197(14)    yes
Cl1 . Ti1 . N1 . 97.40(3)    yes
P1 . Ti1 . N1 . 40.48(3)    yes
P2 . Ti1 . N1 . 126.93(3)    yes
P3 . Ti1 . N1 . 130.36(3)    yes
Cl1 . Ti1 . N2 . 137.43(3)    yes
P1 . Ti1 . N2 . 96.57(3)    yes
P2 . Ti1 . N2 . 41.56(3)    yes
P3 . Ti1 . N2 . 90.25(3)    yes
N1 . Ti1 . N2 . 113.65(4)    yes
Cl1 . Ti1 . N3 . 108.39(3)    yes
P1 . Ti1 . N3 . 130.36(3)    yes
P2 . Ti1 . N3 . 132.08(3)    yes
P3 . Ti1 . N3 . 41.30(3)    yes
N1 . Ti1 . N3 . 90.30(4)    yes
N2 . Ti1 . N3 . 100.16(4)    yes
Ti1 . P1 . N1 . 50.23(4)    yes
Ti1 . P1 . C9 . 120.30(4)    yes
N1 . P1 . C9 . 106.66(6)    yes
Ti1 . P1 . C12 . 131.61(4)    yes
N1 . P1 . C12 . 109.13(6)    yes
C9 . P1 . C12 . 107.12(6)    yes
Ti1 . P2 . N2 . 54.50(4)    yes
Ti1 . P2 . C23 . 127.80(5)    yes
N2 . P2 . C23 . 115.24(6)    yes
Ti1 . P2 . C26 . 127.55(5)    yes
N2 . P2 . C26 . 116.15(6)    yes
C23 . P2 . C26 . 103.54(6)    yes
Ti1 . P3 . N3 . 52.97(4)    yes
Ti1 . P3 . C37 . 122.87(5)    yes
N3 . P3 . C37 . 109.15(6)    yes
Ti1 . P3 . C40 . 129.27(5)    yes
N3 . P3 . C40 . 113.03(6)    yes
C37 . P3 . C40 . 107.86(6)    yes
P1 . N1 . Ti1 . 89.29(5)    yes
P1 . N1 . C1 . 127.52(9)    yes
Ti1 . N1 . C1 . 136.79(9)    yes
P2 . N2 . Ti1 . 83.94(5)    yes
P2 . N2 . C15 . 137.73(9)    yes
Ti1 . N2 . C15 . 137.79(8)    yes
P3 . N3 . Ti1 . 85.73(5)    yes
P3 . N3 . C29 . 129.45(9)    yes
Ti1 . N3 . C29 . 144.77(9)    yes
N1 . C1 . C2 . 121.77(12)    yes
N1 . C1 . C8 . 118.85(11)    yes
C2 . C1 . C8 . 119.34(12)    yes
C1 . C2 . C3 . 120.39(13)    yes
C1 . C2 . H21 . 118.8    no
C3 . C2 . H21 . 120.7    no
C2 . C3 . C4 . 120.37(14)    yes
C2 . C3 . C5 . 119.29(13)    yes
C4 . C3 . C5 . 120.33(14)    yes
C3 . C4 . H41 . 111.2    no
C3 . C4 . H42 . 112.8    no
H41 . C4 . H42 . 108.8    no
C3 . C4 . H43 . 112.0    no
H41 . C4 . H43 . 102.7    no
H42 . C4 . H43 . 108.8    no
C3 . C5 . C6 . 121.14(13)    yes
C3 . C5 . H51 . 118.8    no
C6 . C5 . H51 . 120.1    no
C5 . C6 . C7 . 121.54(13)    yes
C5 . C6 . C8 . 118.75(13)    yes
C7 . C6 . C8 . 119.69(13)    yes
C6 . C7 . H71 . 110.8    no
C6 . C7 . H72 . 110.4    no
H71 . C7 . H72 . 107.8    no
C6 . C7 . H73 . 110.1    no
H71 . C7 . H73 . 108.8    no
H72 . C7 . H73 . 108.9    no
C6 . C8 . C1 . 121.04(13)    yes
C6 . C8 . H81 . 118.9    no
C1 . C8 . H81 . 120.1    no
P1 . C9 . C10 . 114.90(10)    yes
P1 . C9 . C11 . 112.22(10)    yes
C10 . C9 . C11 . 111.57(12)    yes
P1 . C9 . H91 . 103.0    no
C10 . C9 . H91 . 107.4    no
C11 . C9 . H91 . 106.9    no
C9 . C10 . H101 . 112.2    no
C9 . C10 . H102 . 109.2    no
H101 . C10 . H102 . 108.5    no
C9 . C10 . H103 . 111.2    no
H101 . C10 . H103 . 108.1    no
H102 . C10 . H103 . 107.6    no
C9 . C11 . H111 . 110.7    no
C9 . C11 . H112 . 108.9    no
H111 . C11 . H112 . 110.5    no
C9 . C11 . H113 . 111.1    no
H111 . C11 . H113 . 108.3    no
H112 . C11 . H113 . 107.4    no
P1 . C12 . C13 . 109.69(9)    yes
P1 . C12 . C14 . 111.17(10)    yes
C13 . C12 . C14 . 111.22(12)    yes
P1 . C12 . H121 . 109.0    no
C13 . C12 . H121 . 107.3    no
C14 . C12 . H121 . 108.4    no
C12 . C13 . H131 . 111.5    no
C12 . C13 . H132 . 110.1    no
H131 . C13 . H132 . 109.8    no
C12 . C13 . H133 . 111.0    no
H131 . C13 . H133 . 108.1    no
H132 . C13 . H133 . 106.1    no
C12 . C14 . H141 . 111.3    no
C12 . C14 . H142 . 110.2    no
H141 . C14 . H142 . 106.1    no
C12 . C14 . H143 . 111.7    no
H141 . C14 . H143 . 108.2    no
H142 . C14 . H143 . 109.2    no
N2 . C15 . C16 . 123.99(11)    yes
N2 . C15 . C22 . 117.90(12)    yes
C16 . C15 . C22 . 118.10(12)    yes
C15 . C16 . C17 . 121.18(12)    yes
C15 . C16 . H161 . 119.2    no
C17 . C16 . H161 . 119.6    no
C16 . C17 . C18 . 120.38(13)    yes
C16 . C17 . C19 . 119.15(13)    yes
C18 . C17 . C19 . 120.46(13)    yes
C17 . C18 . H181 . 112.2    no
C17 . C18 . H182 . 110.0    no
H181 . C18 . H182 . 104.7    no
C17 . C18 . H183 . 112.7    no
H181 . C18 . H183 . 108.6    no
H182 . C18 . H183 . 108.2    no
C17 . C19 . C20 . 120.91(12)    yes
C17 . C19 . H191 . 118.6    no
C20 . C19 . H191 . 120.5    no
C19 . C20 . C21 . 121.81(12)    yes
C19 . C20 . C22 . 119.16(12)    yes
C21 . C20 . C22 . 119.02(13)    yes
C20 . C21 . H211 . 112.0    no
C20 . C21 . H212 . 110.2    no
H211 . C21 . H212 . 108.9    no
C20 . C21 . H213 . 110.8    no
H211 . C21 . H213 . 106.6    no
H212 . C21 . H213 . 108.2    no
C15 . C22 . C20 . 121.46(12)    yes
C15 . C22 . H221 . 119.5    no
C20 . C22 . H221 . 119.0    no
P2 . C23 . C24 . 118.48(10)    yes
P2 . C23 . C25 . 106.94(10)    yes
C24 . C23 . C25 . 108.90(12)    yes
P2 . C23 . H231 . 104.9    no
C24 . C23 . H231 . 109.1    no
C25 . C23 . H231 . 108.1    no
C23 . C24 . H241 . 113.8    no
C23 . C24 . H242 . 111.3    no
H241 . C24 . H242 . 108.0    no
C23 . C24 . H243 . 109.3    no
H241 . C24 . H243 . 107.1    no
H242 . C24 . H243 . 107.1    no
C23 . C25 . H251 . 112.0    no
C23 . C25 . H252 . 111.1    no
H251 . C25 . H252 . 107.9    no
C23 . C25 . H253 . 110.2    no
H251 . C25 . H253 . 110.0    no
H252 . C25 . H253 . 105.4    no
P2 . C26 . C27 . 114.08(10)    yes
P2 . C26 . C28 . 111.02(10)    yes
C27 . C26 . C28 . 111.79(13)    yes
P2 . C26 . H261 . 104.0    no
C27 . C26 . H261 . 109.2    no
C28 . C26 . H261 . 106.2    no
C26 . C27 . H271 . 110.7    no
C26 . C27 . H272 . 110.1    no
H271 . C27 . H272 . 109.9    no
C26 . C27 . H273 . 109.3    no
H271 . C27 . H273 . 106.9    no
H272 . C27 . H273 . 109.9    no
C26 . C28 . H281 . 110.4    no
C26 . C28 . H282 . 111.2    no
H281 . C28 . H282 . 107.8    no
C26 . C28 . H283 . 109.6    no
H281 . C28 . H283 . 109.3    no
H282 . C28 . H283 . 108.6    no
N3 . C29 . C30 . 121.67(12)    yes
N3 . C29 . C36 . 120.05(11)    yes
C30 . C29 . C36 . 118.28(12)    yes
C29 . C30 . C31 . 121.57(13)    yes
C29 . C30 . H301 . 120.5    no
C31 . C30 . H301 . 117.9    no
C30 . C31 . C32 . 119.37(14)    yes
C30 . C31 . C33 . 119.04(13)    yes
C32 . C31 . C33 . 121.59(13)    yes
C31 . C32 . H321 . 112.5    no
C31 . C32 . H322 . 112.3    no
H321 . C32 . H322 . 107.6    no
C31 . C32 . H323 . 111.5    no
H321 . C32 . H323 . 106.8    no
H322 . C32 . H323 . 105.8    no
C31 . C33 . C34 . 120.92(13)    yes
C31 . C33 . H331 . 120.4    no
C34 . C33 . H331 . 118.7    no
C33 . C34 . C35 . 120.38(13)    yes
C33 . C34 . C36 . 119.25(13)    yes
C35 . C34 . C36 . 120.36(13)    yes
C34 . C35 . H351 . 112.6    no
C34 . C35 . H352 . 109.7    no
H351 . C35 . H352 . 107.3    no
C34 . C35 . H353 . 111.4    no
H351 . C35 . H353 . 108.2    no
H352 . C35 . H353 . 107.4    no
C29 . C36 . C34 . 120.92(12)    yes
C29 . C36 . H361 . 119.6    no
C34 . C36 . H361 . 119.5    no
P3 . C37 . C38 . 115.99(10)    yes
P3 . C37 . C39 . 112.26(10)    yes
C38 . C37 . C39 . 109.74(11)    yes
P3 . C37 . H371 . 103.0    no
C38 . C37 . H371 . 107.9    no
C39 . C37 . H371 . 107.3    no
C37 . C38 . H381 . 111.1    no
C37 . C38 . H382 . 111.6    no
H381 . C38 . H382 . 109.2    no
C37 . C38 . H383 . 110.6    no
H381 . C38 . H383 . 107.4    no
H382 . C38 . H383 . 106.8    no
C37 . C39 . H391 . 111.1    no
C37 . C39 . H392 . 110.0    no
H391 . C39 . H392 . 109.3    no
C37 . C39 . H393 . 109.2    no
H391 . C39 . H393 . 107.3    no
H392 . C39 . H393 . 109.7    no
P3 . C40 . C41 . 112.06(10)    yes
P3 . C40 . C42 . 109.56(10)    yes
C41 . C40 . C42 . 109.11(12)    yes
P3 . C40 . H401 . 105.7    no
C41 . C40 . H401 . 110.1    no
C42 . C40 . H401 . 110.3    no
C40 . C41 . H411 . 112.9    no
C40 . C41 . H412 . 107.7    no
H411 . C41 . H412 . 108.7    no
C40 . C41 . H413 . 110.6    no
H411 . C41 . H413 . 108.2    no
H412 . C41 . H413 . 108.6    no
C40 . C42 . H421 . 111.4    no
C40 . C42 . H422 . 110.0    no
H421 . C42 . H422 . 108.3    no
C40 . C42 . H423 . 109.7    no
H421 . C42 . H423 . 108.9    no
H422 . C42 . H423 . 108.4    no


_iucr_refine_instructions_details_constraints
;
#
# Punched on 08/05/13 at 15:09:41
#
#LIST     12                                                                    
BLOCK SCALE X'S, U'S 
RIDE C   (   2,X'S) H   (  21,X'S) 
RIDE C   (   4,X'S) H   (  41,X'S) H   (  42,X'S) H   (  43,X'S) 
RIDE C   (   5,X'S) H   (  51,X'S) 
RIDE C   (   7,X'S) H   (  71,X'S) H   (  72,X'S) H   (  73,X'S) 
RIDE C   (   8,X'S) H   (  81,X'S) 
RIDE C   (   9,X'S) H   (  91,X'S) 
RIDE C   (  10,X'S) H   ( 101,X'S) H   ( 102,X'S) H   ( 103,X'S) 
RIDE C   (  11,X'S) H   ( 111,X'S) H   ( 112,X'S) H   ( 113,X'S) 
RIDE C   (  12,X'S) H   ( 121,X'S) 
RIDE C   (  13,X'S) H   ( 131,X'S) H   ( 132,X'S) H   ( 133,X'S) 
RIDE C   (  14,X'S) H   ( 141,X'S) H   ( 142,X'S) H   ( 143,X'S) 
RIDE C   (  16,X'S) H   ( 161,X'S) 
RIDE C   (  18,X'S) H   ( 181,X'S) H   ( 182,X'S) H   ( 183,X'S) 
RIDE C   (  19,X'S) H   ( 191,X'S) 
RIDE C   (  21,X'S) H   ( 211,X'S) H   ( 212,X'S) H   ( 213,X'S) 
RIDE C   (  22,X'S) H   ( 221,X'S) 
RIDE C   (  23,X'S) H   ( 231,X'S) 
RIDE C   (  24,X'S) H   ( 241,X'S) H   ( 242,X'S) H   ( 243,X'S) 
RIDE C   (  25,X'S) H   ( 251,X'S) H   ( 252,X'S) H   ( 253,X'S) 
RIDE C   (  26,X'S) H   ( 261,X'S) 
RIDE C   (  27,X'S) H   ( 271,X'S) H   ( 272,X'S) H   ( 273,X'S) 
RIDE C   (  28,X'S) H   ( 281,X'S) H   ( 282,X'S) H   ( 283,X'S) 
RIDE C   (  30,X'S) H   ( 301,X'S) 
RIDE C   (  32,X'S) H   ( 321,X'S) H   ( 322,X'S) H   ( 323,X'S) 
RIDE C   (  33,X'S) H   ( 331,X'S) 
RIDE C   (  35,X'S) H   ( 351,X'S) H   ( 352,X'S) H   ( 353,X'S) 
RIDE C   (  36,X'S) H   ( 361,X'S) 
RIDE C   (  37,X'S) H   ( 371,X'S) 
RIDE C   (  38,X'S) H   ( 381,X'S) H   ( 382,X'S) H   ( 383,X'S) 
RIDE C   (  39,X'S) H   ( 391,X'S) H   ( 392,X'S) H   ( 393,X'S) 
RIDE C   (  40,X'S) H   ( 401,X'S) 
RIDE C   (  41,X'S) H   ( 411,X'S) H   ( 412,X'S) H   ( 413,X'S) 
RIDE C   (  42,X'S) H   ( 421,X'S) H   ( 422,X'S) H   ( 423,X'S) 
END                                                                             
;


_iucr_refine_instructions_details_restraints
;
#
# Punched on 08/05/13 at 15:09:41
#
#LIST     16                                                                    
NO 
REM   HREST   START (DO NOT REMOVE THIS LINE) 
REM   HREST   END (DO NOT REMOVE THIS LINE) 
END                                                                             
;

####

data_2 
_audit_creation_date        "2014-02-27"
_audit_creation_method CRYSTALS_ver_14.43

_oxford_structure_analysis_title  'bw_326_2_0ma in P2(1)/c'
_chemical_name_systematic         ?
_chemical_melting_point           ?

_cell_length_a                    17.9767(14)
_cell_length_b                    19.8816(15)
_cell_length_c                    15.0906(10)
_cell_angle_alpha                 90
_cell_angle_beta                  96.866(3)
_cell_angle_gamma                 90
_cell_volume                      5354.8(7)
 
_symmetry_cell_setting            'monoclinic' 
_symmetry_space_group_name_H-M    'P 1 21/c 1 ' 
_symmetry_space_group_name_Hall   '-P 2ybc ' 
loop_
 _symmetry_equiv_pos_as_xyz
 'x,y,z'
 '-x,-y,-z'
 '-x,y+1/2,-z+1/2'
 'x,-y+1/2,z+1/2'

loop_
_atom_type_symbol
_atom_type_scat_dispersion_real
_atom_type_scat_dispersion_imag
_atom_type_scat_Cromer_Mann_a1
_atom_type_scat_Cromer_Mann_b1
_atom_type_scat_Cromer_Mann_a2
_atom_type_scat_Cromer_Mann_b2
_atom_type_scat_Cromer_Mann_a3
_atom_type_scat_Cromer_Mann_b3
_atom_type_scat_Cromer_Mann_a4
_atom_type_scat_Cromer_Mann_b4
_atom_type_scat_Cromer_Mann_c
_atom_type_scat_source  
 C       0.0033   0.0016   2.3100  20.8439   1.0200  10.2075   1.5886   0.5687
   0.8650  51.6512   0.2156 'International Tables Vol C 4.2.6.8 and 6.1.1.4'
 H       0.0000   0.0000   0.4930  10.5109   0.3229  26.1257   0.1402   3.1424
   0.0408  57.7998   0.0030 'International Tables Vol C 4.2.6.8 and 6.1.1.4'
 N       0.0061   0.0033  12.2126   0.0057   3.1322   9.8933   2.0125  28.9975
   1.1663   0.5826 -11.5290 'International Tables Vol C 4.2.6.8 and 6.1.1.4'
 P       0.1023   0.0942   6.4345   1.9067   4.1791  27.1570   1.7800   0.5260
   1.4908  68.1645   1.1149 'International Tables Vol C 4.2.6.8 and 6.1.1.4'
 Cl      0.1484   0.1585  11.4604   0.0104   7.1964   1.1662   6.2556  18.5194
   1.6455  47.7784  -9.5574 'International Tables Vol C 4.2.6.8 and 6.1.1.4'
 Ti      0.2776   0.4457   9.7595   7.8508   7.3558   0.5000   1.6991  35.6338
   1.9021 116.1050   1.2807 'International Tables Vol C 4.2.6.8 and 6.1.1.4'
 Co      0.3494   0.9721  12.2841   4.2791   7.3409   0.2784   4.0034  13.5359
   2.3488  71.1692   1.0118 'International Tables Vol C 4.2.6.8 and 6.1.1.4'
 O       0.0106   0.0060   3.0485  13.2771   2.2868   5.7011   1.5463   0.3239
   0.8670  32.9089   0.2508 'International Tables Vol C 4.2.6.8 and 6.1.1.4'
 I      -0.4742   1.8119  20.1472   4.3470  18.9949   0.3814   7.5138  27.7660
   2.2735  66.8776   4.0712 'International Tables Vol C 4.2.6.8 and 6.1.1.4'
 
 
_cell_formula_units_Z                    4

# Given Formula = C46 H79 Cl1 Co1 I1 N3 O1 P3 Ti1 
# Dc =      1.31 Fooo =   2192.00 Mu =     12.08 M =   1052.26
# Found Formula = C46 H79 Cl1 Co1 I1 N3 O1 P3 Ti1 
# Dc =      1.31 FOOO =   2192.00 Mu =     12.08 M =   1052.26

_chemical_formula_sum             'C46 H79 Cl1 Co1 I1 N3 O1 P3 Ti1'
_chemical_formula_moiety          'C46 H79 Cl1 Co1 I1 N3 O1 P3 Ti1'
_chemical_compound_source                ?
_chemical_formula_weight           1052.26
 
 
_cell_measurement_reflns_used         9962
_cell_measurement_theta_min              3
_cell_measurement_theta_max             30
_cell_measurement_temperature          120
 
_exptl_crystal_description        'prism' 
_exptl_crystal_colour             'brown' 
_exptl_crystal_size_min           0.150 
_exptl_crystal_size_mid           0.290 
_exptl_crystal_size_max           0.340 
 
_exptl_crystal_density_diffrn     1.305 
_exptl_crystal_density_meas       ? 
_exptl_crystal_density_method     'not measured' 
# Non-dispersive F(000): 
_exptl_crystal_F_000              2192 
_exptl_absorpt_coefficient_mu     1.208 
 
# Sheldrick geometric approximatio 0.70 0.83 
_exptl_absorpt_correction_type    numerical 
_exptl_absorpt_process_details 
; 
 Analytical Absorption (De Meulenaer & Tompa, 1965) 
; 
_exptl_absorpt_correction_T_min   0.70 
_exptl_absorpt_correction_T_max   0.83 
_diffrn_measurement_device_type   'Bruker Kappa Apex2' 
_diffrn_measurement_device        'Area' 
_diffrn_radiation_monochromator   'graphite' 
_diffrn_radiation_type            'Mo K\a'
_diffrn_radiation_wavelength           0.71073
_diffrn_measurement_method        '\f & \w scans' 
 
# If a reference occurs more than once, delete the author 
# and date from subsequent references. 
_computing_data_collection        'Apex2 (Bruker AXS, 2006)' 
_computing_cell_refinement        'Apex2 (Bruker AXS, 2006)' 
_computing_data_reduction         'Apex2 (Bruker AXS, 2006)' 
_computing_structure_solution     'SIR92 (Altomare et al., 1994)' 
_computing_structure_refinement   'CRYSTALS (Betteridge et al., 2003)' 
_computing_publication_material   'CRYSTALS (Betteridge et al., 2003)' 
_computing_molecular_graphics     'CAMERON (Watkin et al., 1996)' 
 
_diffrn_standards_interval_time   . 
_diffrn_standards_interval_count  . 
_diffrn_standards_number          0 
_diffrn_standards_decay_%         ? 
 
_diffrn_ambient_temperature        120
_diffrn_reflns_number             76694 
_reflns_number_total              15548 
_diffrn_reflns_av_R_equivalents   0.035 
# Number of reflections without Friedels Law is 0 
# Number of reflections with Friedels Law is 15548 
# Theoretical number of reflections is about 31321 
 
 
_diffrn_reflns_theta_min          1.702 
_diffrn_reflns_theta_max          30.029 
_diffrn_measured_fraction_theta_max 0.993 
 
_diffrn_reflns_theta_full         29.429 
_diffrn_measured_fraction_theta_full 0.995 
 
 
_diffrn_reflns_limit_h_min        -25 
_diffrn_reflns_limit_h_max        25 
_diffrn_reflns_limit_k_min        -27 
_diffrn_reflns_limit_k_max        27 
_diffrn_reflns_limit_l_min        -21 
_diffrn_reflns_limit_l_max        19 
_reflns_limit_h_min               -25 
_reflns_limit_h_max               25 
_reflns_limit_k_min               0 
_reflns_limit_k_max               27 
_reflns_limit_l_min               0 
_reflns_limit_l_max               21 
 
_oxford_diffrn_Wilson_B_factor    0.00 
_oxford_diffrn_Wilson_scale       0.00 
 
_atom_sites_solution_primary      direct #heavy,direct,difmap,geom
# _atom_sites_solution_secondary  difmap
_atom_sites_solution_hydrogens    difmap
 
_refine_diff_density_min          -0.69 
_refine_diff_density_max          1.03 
 
 
# The current dictionary definitions do not cover the 
# situation where the reflections used for refinement were 
# selected by a user-defined sigma threshold 
 
 
# The values actually used during refinement 
_oxford_reflns_threshold_expression_ref     I>-10.0\s(I)
_refine_ls_number_reflns          15548 
_refine_ls_number_restraints      0 
_refine_ls_number_parameters      514 
_oxford_refine_ls_R_factor_ref    0.0368 
_refine_ls_wR_factor_ref          0.0628 
_refine_ls_goodness_of_fit_ref    0.9887 
_refine_ls_shift/su_max           0.0009058 
_refine_ls_shift/su_mean          0.0000781 
 
 
# The values computed with all filters except I/sigma 
_oxford_reflns_number_all         15548 
_refine_ls_R_factor_all           0.0368 
_refine_ls_wR_factor_all          0.0628 
 
# The values computed with a 2 sigma cutoff - a la SHELX 
_reflns_threshold_expression      I>2.0\s(I)
_reflns_number_gt                 12437 
_refine_ls_R_factor_gt            0.0257 
_refine_ls_wR_factor_gt           0.0569 
 
# choose from: rm (reference molecule of known chirality), 
# ad (anomolous dispersion - Flack), rmad (rm and ad), 
# syn (from synthesis), unk (unknown) or . (not applicable). 
_chemical_absolute_configuration  '.' 
 
 
_refine_ls_structure_factor_coef  Fsqd 
_refine_ls_matrix_type            full
_refine_ls_hydrogen_treatment     constr         #undef, noref, refall,
                                                 # refxyz, refU, constr or mixed
_refine_ls_weighting_scheme       calc 
_refine_ls_weighting_details 
;
 Method= Modified Sheldrick 
 w=1/[\s^2^(F^2^) + ( 0.03P)^2^ + 3.23P] 
 ,where P=(max(Fo^2^,0) + 2Fc^2^)/3 
;
# Insert your own references if required - in alphabetical order 
_publ_section_references 
; 
Altomare, A., Cascarano, G., Giacovazzo, C., Guagliardi, A., Burla, M.C., 
Polidori, G. & Camalli, M. (1994). J. Appl. Cryst. 27, 435. 
 
Betteridge, P.W., Carruthers, J.R., Cooper, R.I., 
Prout, K. & Watkin, D.J. (2003). J. Appl. Cryst. 36, 1487. 
 
Bruker Analytical X-ray Systems, Inc., 2006. <i>Apex2</i>, 
Version 2 User Manual, M86-E01078, Madison, WI. 
 
De Meulenaer, J. & Tompa, H. (1965). Acta Cryst. 19, 1014. 
 
Watkin, D.J., Prout, C.K. & Pearce, L.J. (1996). CAMERON, Chemical 
Crystallography Laboratory, Oxford, UK. 
; 

# Uequiv = arithmetic mean of Ui i.e. Ueqiv = (U1+U2+U3)/3

# Replace last . with number of unfound hydrogen atoms attached to an atom.

# ..._refinement_flags_... 
# . no refinement constraints           S special position constraint on site
# G rigid group refinement of site      R riding atom
# D distance or angle restraint on site T thermal displacement constraints
# U Uiso or Uij restraint (rigid bond)  P partial occupancy constraint


loop_
_atom_site_label
_atom_site_type_symbol
_atom_site_fract_x
_atom_site_fract_y
_atom_site_fract_z
_atom_site_U_iso_or_equiv
_atom_site_occupancy
_atom_site_adp_type
_atom_site_refinement_flags_posn
_atom_site_refinement_flags_adp
_atom_site_refinement_flags_occupancy
_atom_site_disorder_assembly
_atom_site_disorder_group
_atom_site_attached_hydrogens
Co1 Co 0.222127(11) 0.288389(10) 0.177477(13) 0.0126 1.0000 Uani . . . . . . 
Ti1 Ti 0.224189(14) 0.421398(13) 0.191681(16) 0.0105 1.0000 Uani . . . . . . 
I1 I 0.224068(7) 0.169209(5) 0.115118(7) 0.0249 1.0000 Uani . . . . . . 
Cl1 Cl 0.21860(2) 0.361986(18) 0.05613(2) 0.0163 1.0000 Uani . . . . . . 
P1 P 0.32159(2) 0.322894(19) 0.27320(2) 0.0133 1.0000 Uani . . . . . . 
P2 P 0.11818(2) 0.326806(19) 0.23474(2) 0.0119 1.0000 Uani . . . . . . 
P3 P 0.21061(2) 0.547621(19) 0.19218(2) 0.0137 1.0000 Uani . . . . . . 
O1 O 0.73088(8) 0.19103(8) 0.64341(11) 0.0437 1.0000 Uani . . . . . . 
N1 N 0.30465(7) 0.40449(6) 0.28814(8) 0.0147 1.0000 Uani . . . . . . 
N2 N 0.12436(7) 0.41131(6) 0.23139(8) 0.0133 1.0000 Uani . . . . . . 
N3 N 0.26434(7) 0.50020(6) 0.13512(8) 0.0130 1.0000 Uani . . . . . . 
C1 C 0.34423(9) 0.45164(8) 0.34703(10) 0.0172 1.0000 Uani . . . . . . 
C2 C 0.40970(9) 0.48235(8) 0.32611(10) 0.0190 1.0000 Uani . . . . . . 
C3 C 0.44475(10) 0.53201(9) 0.38136(11) 0.0249 1.0000 Uani . . . . . . 
C4 C 0.51344(11) 0.56712(11) 0.35611(14) 0.0366 1.0000 Uani . . . . . . 
C5 C 0.41388(11) 0.54979(9) 0.45803(12) 0.0303 1.0000 Uani . . . . . . 
C6 C 0.34946(11) 0.51931(10) 0.48099(11) 0.0288 1.0000 Uani . . . . . . 
C7 C 0.31583(13) 0.53913(13) 0.56447(13) 0.0449 1.0000 Uani . . . . . . 
C8 C 0.31507(10) 0.46995(9) 0.42500(11) 0.0228 1.0000 Uani . . . . . . 
C9 C 0.41536(8) 0.31834(8) 0.23414(10) 0.0179 1.0000 Uani . . . . . . 
C10 C 0.41371(9) 0.35278(9) 0.14340(11) 0.0220 1.0000 Uani . . . . . . 
C11 C 0.44326(10) 0.24596(9) 0.22725(13) 0.0276 1.0000 Uani . . . . . . 
C12 C 0.33100(9) 0.28200(8) 0.38400(10) 0.0198 1.0000 Uani . . . . . . 
C13 C 0.40000(10) 0.30413(10) 0.44652(11) 0.0278 1.0000 Uani . . . . . . 
C14 C 0.32627(10) 0.20523(9) 0.37797(12) 0.0242 1.0000 Uani . . . . . . 
C15 C 0.07405(8) 0.45596(7) 0.26809(10) 0.0147 1.0000 Uani . . . . . . 
C16 C 0.09652(9) 0.48708(8) 0.34962(10) 0.0187 1.0000 Uani . . . . . . 
C17 C 0.04959(10) 0.53191(8) 0.38687(11) 0.0230 1.0000 Uani . . . . . . 
C18 C 0.07478(12) 0.56511(10) 0.47486(13) 0.0328 1.0000 Uani . . . . . . 
C19 C -0.02050(10) 0.54565(8) 0.34107(12) 0.0256 1.0000 Uani . . . . . . 
C20 C -0.04401(9) 0.51589(8) 0.25978(12) 0.0232 1.0000 Uani . . . . . . 
C21 C -0.11854(10) 0.53350(10) 0.20884(16) 0.0373 1.0000 Uani . . . . . . 
C22 C 0.00358(9) 0.47040(8) 0.22376(11) 0.0187 1.0000 Uani . . . . . . 
C23 C 0.11020(9) 0.30373(8) 0.35166(10) 0.0174 1.0000 Uani . . . . . . 
C24 C 0.03569(10) 0.32111(9) 0.38606(12) 0.0249 1.0000 Uani . . . . . . 
C25 C 0.13055(10) 0.23003(9) 0.37060(12) 0.0254 1.0000 Uani . . . . . . 
C26 C 0.02745(8) 0.30431(8) 0.17111(10) 0.0163 1.0000 Uani . . . . . . 
C27 C 0.02626(10) 0.32476(9) 0.07353(11) 0.0224 1.0000 Uani . . . . . . 
C28 C 0.01066(10) 0.22907(8) 0.17691(12) 0.0262 1.0000 Uani . . . . . . 
C29 C 0.31413(8) 0.51793(7) 0.07280(10) 0.0137 1.0000 Uani . . . . . . 
C30 C 0.38073(8) 0.55149(8) 0.10130(10) 0.0162 1.0000 Uani . . . . . . 
C31 C 0.43086(9) 0.56833(8) 0.04117(11) 0.0179 1.0000 Uani . . . . . . 
C32 C 0.50153(9) 0.60639(9) 0.07267(12) 0.0239 1.0000 Uani . . . . . . 
C33 C 0.41384(9) 0.55047(8) -0.04777(11) 0.0195 1.0000 Uani . . . . . . 
C34 C 0.34804(9) 0.51676(8) -0.07797(10) 0.0176 1.0000 Uani . . . . . . 
C35 C 0.33086(10) 0.49779(10) -0.17476(11) 0.0263 1.0000 Uani . . . . . . 
C36 C 0.29821(8) 0.50059(8) -0.01702(10) 0.0154 1.0000 Uani . . . . . . 
C37 C 0.26466(9) 0.61273(8) 0.25912(11) 0.0203 1.0000 Uani . . . . . . 
C38 C 0.28440(11) 0.67484(9) 0.20680(13) 0.0284 1.0000 Uani . . . . . . 
C39 C 0.22560(11) 0.63176(9) 0.34062(12) 0.0276 1.0000 Uani . . . . . . 
C40 C 0.14376(9) 0.59155(8) 0.10965(10) 0.0189 1.0000 Uani . . . . . . 
C41 C 0.10394(9) 0.53999(9) 0.04593(11) 0.0236 1.0000 Uani . . . . . . 
C42 C 0.08736(10) 0.63311(9) 0.15577(12) 0.0258 1.0000 Uani . . . . . . 
C43 C 0.63080(15) 0.23375(14) 0.54320(19) 0.0578 1.0000 Uani . . . . . . 
C44 C 0.70629(14) 0.20051(12) 0.55190(17) 0.0472 1.0000 Uani . . . . . . 
C45 C 0.80121(13) 0.15859(12) 0.65754(19) 0.0495 1.0000 Uani . . . . . . 
C46 C 0.82255(15) 0.14940(14) 0.7556(2) 0.0595 1.0000 Uani . . . . . . 
H21 H 0.4298 0.4709 0.2739 0.0228 1.0000 Uiso R . . . . . 
H41 H 0.5483 0.5742 0.4061 0.0561 1.0000 Uiso R . . . . . 
H42 H 0.5012 0.6089 0.3298 0.0560 1.0000 Uiso R . . . . . 
H43 H 0.5356 0.5421 0.3135 0.0568 1.0000 Uiso R . . . . . 
H51 H 0.4367 0.5825 0.4958 0.0367 1.0000 Uiso R . . . . . 
H71 H 0.3513 0.5605 0.6057 0.0665 1.0000 Uiso R . . . . . 
H72 H 0.2985 0.5013 0.5933 0.0673 1.0000 Uiso R . . . . . 
H73 H 0.2757 0.5701 0.5521 0.0682 1.0000 Uiso R . . . . . 
H81 H 0.2722 0.4481 0.4394 0.0262 1.0000 Uiso R . . . . . 
H91 H 0.4505 0.3434 0.2773 0.0214 1.0000 Uiso R . . . . . 
H101 H 0.3957 0.3980 0.1434 0.0318 1.0000 Uiso R . . . . . 
H102 H 0.3818 0.3293 0.0989 0.0316 1.0000 Uiso R . . . . . 
H103 H 0.4629 0.3537 0.1261 0.0332 1.0000 Uiso R . . . . . 
H111 H 0.4875 0.2462 0.1960 0.0403 1.0000 Uiso R . . . . . 
H112 H 0.4056 0.2178 0.1944 0.0407 1.0000 Uiso R . . . . . 
H113 H 0.4568 0.2265 0.2843 0.0406 1.0000 Uiso R . . . . . 
H121 H 0.2879 0.2979 0.4086 0.0237 1.0000 Uiso R . . . . . 
H131 H 0.4030 0.3521 0.4508 0.0412 1.0000 Uiso R . . . . . 
H132 H 0.4458 0.2873 0.4257 0.0417 1.0000 Uiso R . . . . . 
H133 H 0.3967 0.2865 0.5056 0.0410 1.0000 Uiso R . . . . . 
H141 H 0.2883 0.1911 0.3317 0.0356 1.0000 Uiso R . . . . . 
H142 H 0.3739 0.1867 0.3680 0.0352 1.0000 Uiso R . . . . . 
H143 H 0.3125 0.1886 0.4342 0.0364 1.0000 Uiso R . . . . . 
H161 H 0.1452 0.4778 0.3799 0.0215 1.0000 Uiso R . . . . . 
H181 H 0.0366 0.5645 0.5121 0.0512 1.0000 Uiso R . . . . . 
H182 H 0.0891 0.6093 0.4678 0.0508 1.0000 Uiso R . . . . . 
H183 H 0.1157 0.5428 0.5076 0.0501 1.0000 Uiso R . . . . . 
H191 H -0.0523 0.5744 0.3662 0.0320 1.0000 Uiso R . . . . . 
H211 H -0.1116 0.5642 0.1608 0.0578 1.0000 Uiso R . . . . . 
H212 H -0.1436 0.4955 0.1809 0.0565 1.0000 Uiso R . . . . . 
H213 H -0.1491 0.5561 0.2454 0.0574 1.0000 Uiso R . . . . . 
H221 H -0.0113 0.4498 0.1690 0.0217 1.0000 Uiso R . . . . . 
H231 H 0.1488 0.3305 0.3846 0.0215 1.0000 Uiso R . . . . . 
H241 H 0.0214 0.3677 0.3747 0.0367 1.0000 Uiso R . . . . . 
H242 H -0.0047 0.2936 0.3593 0.0369 1.0000 Uiso R . . . . . 
H243 H 0.0410 0.3134 0.4495 0.0357 1.0000 Uiso R . . . . . 
H251 H 0.0877 0.2015 0.3572 0.0375 1.0000 Uiso R . . . . . 
H252 H 0.1691 0.2146 0.3366 0.0377 1.0000 Uiso R . . . . . 
H253 H 0.1487 0.2244 0.4323 0.0379 1.0000 Uiso R . . . . . 
H261 H -0.0093 0.3301 0.1982 0.0192 1.0000 Uiso R . . . . . 
H271 H -0.0228 0.3174 0.0434 0.0342 1.0000 Uiso R . . . . . 
H272 H 0.0609 0.2981 0.0460 0.0333 1.0000 Uiso R . . . . . 
H273 H 0.0407 0.3705 0.0675 0.0324 1.0000 Uiso R . . . . . 
H281 H 0.0057 0.2155 0.2370 0.0384 1.0000 Uiso R . . . . . 
H282 H -0.0342 0.2181 0.1389 0.0387 1.0000 Uiso R . . . . . 
H283 H 0.0517 0.2034 0.1589 0.0381 1.0000 Uiso R . . . . . 
H301 H 0.3918 0.5626 0.1605 0.0179 1.0000 Uiso R . . . . . 
H321 H 0.5148 0.5999 0.1348 0.0378 1.0000 Uiso R . . . . . 
H322 H 0.5416 0.5926 0.0417 0.0369 1.0000 Uiso R . . . . . 
H323 H 0.4938 0.6530 0.0615 0.0374 1.0000 Uiso R . . . . . 
H331 H 0.4474 0.5612 -0.0887 0.0235 1.0000 Uiso R . . . . . 
H351 H 0.3720 0.4995 -0.2066 0.0414 1.0000 Uiso R . . . . . 
H352 H 0.2959 0.5259 -0.2048 0.0422 1.0000 Uiso R . . . . . 
H353 H 0.3105 0.4549 -0.1830 0.0420 1.0000 Uiso R . . . . . 
H361 H 0.2549 0.4769 -0.0364 0.0172 1.0000 Uiso R . . . . . 
H371 H 0.3103 0.5903 0.2806 0.0239 1.0000 Uiso R . . . . . 
H381 H 0.3096 0.6630 0.1567 0.0423 1.0000 Uiso R . . . . . 
H382 H 0.3162 0.7048 0.2440 0.0435 1.0000 Uiso R . . . . . 
H383 H 0.2391 0.6984 0.1838 0.0421 1.0000 Uiso R . . . . . 
H391 H 0.2167 0.5929 0.3755 0.0397 1.0000 Uiso R . . . . . 
H392 H 0.2571 0.6610 0.3789 0.0417 1.0000 Uiso R . . . . . 
H393 H 0.1796 0.6538 0.3227 0.0415 1.0000 Uiso R . . . . . 
H401 H 0.1726 0.6209 0.0752 0.0231 1.0000 Uiso R . . . . . 
H411 H 0.1380 0.5151 0.0150 0.0348 1.0000 Uiso R . . . . . 
H412 H 0.0754 0.5094 0.0777 0.0342 1.0000 Uiso R . . . . . 
H413 H 0.0705 0.5619 0.0021 0.0360 1.0000 Uiso R . . . . . 
H421 H 0.0490 0.6494 0.1119 0.0384 1.0000 Uiso R . . . . . 
H422 H 0.0647 0.6066 0.1985 0.0378 1.0000 Uiso R . . . . . 
H423 H 0.1114 0.6708 0.1862 0.0393 1.0000 Uiso R . . . . . 
H431 H 0.6122 0.2409 0.4799 0.0864 1.0000 Uiso R . . . . . 
H432 H 0.5958 0.2054 0.5712 0.0862 1.0000 Uiso R . . . . . 
H433 H 0.6327 0.2777 0.5735 0.0863 1.0000 Uiso R . . . . . 
H441 H 0.7033 0.1564 0.5215 0.0563 1.0000 Uiso R . . . . . 
H442 H 0.7439 0.2286 0.5255 0.0570 1.0000 Uiso R . . . . . 
H451 H 0.8379 0.1865 0.6312 0.0586 1.0000 Uiso R . . . . . 
H452 H 0.7978 0.1148 0.6276 0.0590 1.0000 Uiso R . . . . . 
H461 H 0.7826 0.1262 0.7800 0.0871 1.0000 Uiso R . . . . . 
H462 H 0.8291 0.1919 0.7853 0.0884 1.0000 Uiso R . . . . . 
H463 H 0.8684 0.1239 0.7681 0.0885 1.0000 Uiso R . . . . . 
loop_
_atom_site_aniso_label
_atom_site_aniso_U_11
_atom_site_aniso_U_22
_atom_site_aniso_U_33
_atom_site_aniso_U_23
_atom_site_aniso_U_13
_atom_site_aniso_U_12
Co1 0.01483(9) 0.01047(9) 0.01327(9) -0.00038(7) 0.00424(7) 0.00085(7) 
Ti1 0.01204(11) 0.00972(12) 0.01011(11) -0.00007(9) 0.00265(9) 0.00035(9) 
I1 0.03641(7) 0.01265(5) 0.02709(6) -0.00393(4) 0.01042(4) 0.00040(4) 
Cl1 0.02512(18) 0.01338(16) 0.01095(15) -0.00123(12) 0.00455(12) -0.00211(13) 
P1 0.01372(17) 0.01350(18) 0.01305(16) 0.00217(13) 0.00308(13) 0.00243(14) 
P2 0.01293(16) 0.01064(17) 0.01279(16) 0.00118(13) 0.00370(13) 0.00052(13) 
P3 0.01718(18) 0.01030(17) 0.01412(17) -0.00044(13) 0.00396(13) 0.00039(14) 
O1 0.0351(8) 0.0395(8) 0.0565(10) -0.0203(7) 0.0053(7) 0.0010(7) 
N1 0.0158(6) 0.0142(6) 0.0139(6) -0.0007(5) 0.0002(4) 0.0011(5) 
N2 0.0144(6) 0.0104(6) 0.0156(6) -0.0003(4) 0.0040(4) 0.0013(5) 
N3 0.0144(6) 0.0108(6) 0.0141(6) 0.0002(4) 0.0029(4) -0.0007(4) 
C1 0.0198(7) 0.0155(7) 0.0150(7) 0.0006(5) -0.0030(5) 0.0018(6) 
C2 0.0206(7) 0.0197(8) 0.0157(7) 0.0009(6) -0.0023(6) 0.0004(6) 
C3 0.0252(8) 0.0224(8) 0.0245(8) 0.0020(6) -0.0077(6) -0.0034(7) 
C4 0.0359(11) 0.0343(11) 0.0371(11) 0.0023(8) -0.0060(8) -0.0149(9) 
C5 0.0375(10) 0.0242(9) 0.0260(9) -0.0067(7) -0.0098(7) -0.0024(8) 
C6 0.0357(10) 0.0312(10) 0.0180(8) -0.0076(7) -0.0025(7) 0.0046(8) 
C7 0.0534(14) 0.0558(15) 0.0253(10) -0.0190(9) 0.0035(9) 0.0035(11) 
C8 0.0239(8) 0.0259(9) 0.0178(7) -0.0017(6) -0.0006(6) 0.0027(7) 
C9 0.0152(7) 0.0189(8) 0.0204(7) 0.0027(6) 0.0055(6) 0.0026(6) 
C10 0.0214(8) 0.0241(8) 0.0220(8) 0.0043(6) 0.0091(6) 0.0014(6) 
C11 0.0250(9) 0.0236(9) 0.0368(10) 0.0068(7) 0.0141(7) 0.0096(7) 
C12 0.0195(7) 0.0234(8) 0.0171(7) 0.0072(6) 0.0045(6) 0.0052(6) 
C13 0.0282(9) 0.0329(10) 0.0206(8) 0.0078(7) -0.0046(7) 0.0025(8) 
C14 0.0219(8) 0.0238(9) 0.0276(8) 0.0122(7) 0.0057(6) 0.0049(7) 
C15 0.0156(7) 0.0112(7) 0.0187(7) 0.0008(5) 0.0082(5) 0.0002(5) 
C16 0.0215(8) 0.0155(7) 0.0202(7) -0.0008(6) 0.0078(6) 0.0002(6) 
C17 0.0308(9) 0.0161(8) 0.0249(8) -0.0030(6) 0.0149(7) -0.0009(6) 
C18 0.0428(11) 0.0291(10) 0.0291(9) -0.0097(8) 0.0158(8) -0.0008(8) 
C19 0.0269(9) 0.0157(8) 0.0380(10) -0.0019(7) 0.0197(7) 0.0035(6) 
C20 0.0164(7) 0.0154(8) 0.0393(10) 0.0016(7) 0.0094(7) 0.0031(6) 
C21 0.0212(9) 0.0290(10) 0.0615(14) -0.0044(9) 0.0038(9) 0.0088(8) 
C22 0.0173(7) 0.0134(7) 0.0259(8) 0.0004(6) 0.0047(6) 0.0006(6) 
C23 0.0186(7) 0.0195(7) 0.0151(7) 0.0034(6) 0.0054(5) 0.0023(6) 
C24 0.0283(9) 0.0245(9) 0.0250(8) 0.0072(7) 0.0158(7) 0.0060(7) 
C25 0.0258(9) 0.0244(9) 0.0276(8) 0.0136(7) 0.0097(7) 0.0083(7) 
C26 0.0142(7) 0.0136(7) 0.0210(7) 0.0002(6) 0.0022(5) -0.0010(5) 
C27 0.0234(8) 0.0242(9) 0.0184(7) 0.0013(6) -0.0027(6) -0.0015(7) 
C28 0.0255(9) 0.0176(8) 0.0348(9) 0.0014(7) 0.0012(7) -0.0070(7) 
C29 0.0156(7) 0.0104(6) 0.0155(7) 0.0024(5) 0.0034(5) 0.0013(5) 
C30 0.0173(7) 0.0147(7) 0.0164(7) 0.0005(5) 0.0015(5) -0.0004(6) 
C31 0.0163(7) 0.0148(7) 0.0229(8) 0.0018(6) 0.0038(6) -0.0017(6) 
C32 0.0182(8) 0.0243(9) 0.0293(9) 0.0013(7) 0.0032(6) -0.0071(6) 
C33 0.0163(7) 0.0226(8) 0.0210(7) 0.0046(6) 0.0076(6) -0.0015(6) 
C34 0.0182(7) 0.0190(7) 0.0162(7) 0.0026(6) 0.0042(6) 0.0017(6) 
C35 0.0227(8) 0.0398(10) 0.0172(8) -0.0004(7) 0.0059(6) -0.0021(7) 
C36 0.0137(7) 0.0155(7) 0.0171(7) 0.0019(5) 0.0023(5) -0.0007(5) 
C37 0.0256(8) 0.0143(7) 0.0213(8) -0.0049(6) 0.0043(6) -0.0035(6) 
C38 0.0386(10) 0.0162(8) 0.0326(9) -0.0036(7) 0.0135(8) -0.0069(7) 
C39 0.0377(10) 0.0224(9) 0.0241(8) -0.0089(7) 0.0091(7) -0.0057(7) 
C40 0.0224(8) 0.0151(7) 0.0199(7) 0.0032(6) 0.0058(6) 0.0057(6) 
C41 0.0226(8) 0.0275(9) 0.0201(8) 0.0017(6) -0.0003(6) 0.0087(7) 
C42 0.0287(9) 0.0222(8) 0.0272(9) 0.0023(7) 0.0066(7) 0.0109(7) 
C43 0.0505(15) 0.0480(15) 0.0710(17) -0.0181(13) -0.0089(13) -0.0056(12) 
C44 0.0523(14) 0.0343(12) 0.0557(14) -0.0156(10) 0.0094(11) -0.0109(10) 
C45 0.0383(12) 0.0354(12) 0.0768(18) -0.0116(12) 0.0158(12) 0.0002(10) 
C46 0.0428(14) 0.0476(15) 0.085(2) -0.0232(14) -0.0066(13) 0.0046(12) 

_refine_ls_extinction_method 
    'None'
_oxford_refine_ls_scale 0.075398(6) 
loop_
 _geom_bond_atom_site_label_1
 _geom_bond_site_symmetry_1
 _geom_bond_atom_site_label_2
 _geom_bond_site_symmetry_2
 _geom_bond_distance
 _geom_bond_publ_flag
Co1 . Ti1 . 2.6530(4)    yes
Co1 . I1 . 2.5513(3)    yes
Co1 . Cl1 . 2.3389(4)    yes
Co1 . P1 . 2.2665(4)    yes
Co1 . P2 . 2.2821(4)    yes
Ti1 . Cl1 . 2.3538(4)    yes
Ti1 . P1 . 2.8107(5)    yes
Ti1 . P2 . 2.8083(5)    yes
Ti1 . P3 . 2.5215(5)    yes
Ti1 . N1 . 1.9546(13)    yes
Ti1 . N2 . 1.9690(12)    yes
Ti1 . N3 . 1.9625(12)    yes
P1 . N1 . 1.6710(13)    yes
P1 . C9 . 1.8532(15)    yes
P1 . C12 . 1.8487(15)    yes
P2 . N2 . 1.6849(13)    yes
P2 . C23 . 1.8451(15)    yes
P2 . C26 . 1.8461(15)    yes
P3 . N3 . 1.6618(12)    yes
P3 . C37 . 1.8455(16)    yes
P3 . C40 . 1.8441(16)    yes
O1 . C44 . 1.411(3)    yes
O1 . C45 . 1.413(3)    yes
N1 . C1 . 1.4225(19)    yes
N2 . C15 . 1.4256(18)    yes
N3 . C29 . 1.4181(18)    yes
C1 . C2 . 1.395(2)    yes
C1 . C8 . 1.393(2)    yes
C2 . C3 . 1.393(2)    yes
C2 . H21 . 0.934    no
C3 . C4 . 1.506(3)    yes
C3 . C5 . 1.388(3)    yes
C4 . H41 . 0.932    no
C4 . H42 . 0.936    no
C4 . H43 . 0.939    no
C5 . C6 . 1.387(3)    yes
C5 . H51 . 0.927    no
C6 . C7 . 1.513(3)    yes
C6 . C8 . 1.391(2)    yes
C7 . H71 . 0.938    no
C7 . H72 . 0.940    no
C7 . H73 . 0.949    no
C8 . H81 . 0.933    no
C9 . C10 . 1.528(2)    yes
C9 . C11 . 1.532(2)    yes
C9 . H91 . 0.987    no
C10 . H101 . 0.956    no
C10 . H102 . 0.952    no
C10 . H103 . 0.951    no
C11 . H111 . 0.971    no
C11 . H112 . 0.968    no
C11 . H113 . 0.948    no
C12 . C13 . 1.531(2)    yes
C12 . C14 . 1.531(2)    yes
C12 . H121 . 0.953    no
C13 . H131 . 0.957    no
C13 . H132 . 0.974    no
C13 . H133 . 0.967    no
C14 . H141 . 0.958    no
C14 . H142 . 0.961    no
C14 . H143 . 0.969    no
C15 . C16 . 1.393(2)    yes
C15 . C22 . 1.390(2)    yes
C16 . C17 . 1.391(2)    yes
C16 . H161 . 0.956    no
C17 . C18 . 1.503(2)    yes
C17 . C19 . 1.390(3)    yes
C18 . H181 . 0.937    no
C18 . H182 . 0.926    no
C18 . H183 . 0.946    no
C19 . C20 . 1.382(3)    yes
C19 . H191 . 0.922    no
C20 . C21 . 1.504(3)    yes
C20 . C22 . 1.399(2)    yes
C21 . H211 . 0.968    no
C21 . H212 . 0.952    no
C21 . H213 . 0.938    no
C22 . H221 . 0.932    no
C23 . C24 . 1.533(2)    yes
C23 . C25 . 1.529(2)    yes
C23 . H231 . 0.964    no
C24 . H241 . 0.970    no
C24 . H242 . 0.959    no
C24 . H243 . 0.963    no
C25 . H251 . 0.958    no
C25 . H252 . 0.961    no
C25 . H253 . 0.956    no
C26 . C27 . 1.525(2)    yes
C26 . C28 . 1.531(2)    yes
C26 . H261 . 0.965    no
C27 . H271 . 0.954    no
C27 . H272 . 0.951    no
C27 . H273 . 0.954    no
C28 . H281 . 0.961    no
C28 . H282 . 0.957    no
C28 . H283 . 0.962    no
C29 . C30 . 1.393(2)    yes
C29 . C36 . 1.395(2)    yes
C30 . C31 . 1.394(2)    yes
C30 . H301 . 0.919    no
C31 . C32 . 1.506(2)    yes
C31 . C33 . 1.387(2)    yes
C32 . H321 . 0.949    no
C32 . H322 . 0.945    no
C32 . H323 . 0.949    no
C33 . C34 . 1.388(2)    yes
C33 . H331 . 0.938    no
C34 . C35 . 1.504(2)    yes
C34 . C36 . 1.396(2)    yes
C35 . H351 . 0.930    no
C35 . H352 . 0.919    no
C35 . H353 . 0.931    no
C36 . H361 . 0.927    no
C37 . C38 . 1.530(2)    yes
C37 . C39 . 1.535(2)    yes
C37 . H371 . 0.955    no
C38 . H381 . 0.956    no
C38 . H382 . 0.959    no
C38 . H383 . 0.968    no
C39 . H391 . 0.959    no
C39 . H392 . 0.955    no
C39 . H393 . 0.946    no
C40 . C41 . 1.524(2)    yes
C40 . C42 . 1.537(2)    yes
C40 . H401 . 0.972    no
C41 . H411 . 0.952    no
C41 . H412 . 0.959    no
C41 . H413 . 0.945    no
C42 . H421 . 0.954    no
C42 . H422 . 0.961    no
C42 . H423 . 0.956    no
C43 . C44 . 1.501(4)    yes
C43 . H431 . 0.984    no
C43 . H432 . 0.977    no
C43 . H433 . 0.985    no
C44 . H441 . 0.988    no
C44 . H442 . 0.997    no
C45 . C46 . 1.494(4)    yes
C45 . H451 . 0.982    no
C45 . H452 . 0.978    no
C46 . H461 . 0.964    no
C46 . H462 . 0.958    no
C46 . H463 . 0.966    no
loop_
 _geom_angle_atom_site_label_1
 _geom_angle_site_symmetry_1
 _geom_angle_atom_site_label_2
 _geom_angle_site_symmetry_2
 _geom_angle_atom_site_label_3
 _geom_angle_site_symmetry_3
 _geom_angle
 _geom_angle_publ_flag
Ti1 . Co1 . I1 . 162.720(10)    yes
Ti1 . Co1 . Cl1 . 55.839(11)    yes
I1 . Co1 . Cl1 . 107.009(12)    yes
Ti1 . Co1 . P1 . 69.175(12)    yes
I1 . Co1 . P1 . 118.142(13)    yes
Cl1 . Co1 . P1 . 104.783(16)    yes
Ti1 . Co1 . P2 . 68.897(12)    yes
I1 . Co1 . P2 . 119.897(13)    yes
Cl1 . Co1 . P2 . 98.063(16)    yes
P1 . Co1 . P2 . 106.061(16)    yes
Co1 . Ti1 . Cl1 . 55.310(11)    yes
Co1 . Ti1 . P1 . 48.913(10)    yes
Cl1 . Ti1 . P1 . 89.448(16)    yes
Co1 . Ti1 . P2 . 49.298(10)    yes
Cl1 . Ti1 . P2 . 84.569(15)    yes
P1 . Ti1 . P2 . 80.595(14)    yes
Co1 . Ti1 . P3 . 172.688(15)    yes
Cl1 . Ti1 . P3 . 120.526(16)    yes
P1 . Ti1 . P3 . 138.386(16)    yes
P2 . Ti1 . P3 . 126.671(15)    yes
Co1 . Ti1 . N1 . 83.73(4)    yes
Cl1 . Ti1 . N1 . 120.79(4)    yes
P1 . Ti1 . N1 . 35.65(4)    yes
P2 . Ti1 . N1 . 100.06(4)    yes
P3 . Ti1 . N1 . 103.42(4)    yes
Co1 . Ti1 . N2 . 85.33(4)    yes
Cl1 . Ti1 . N2 . 105.52(4)    yes
P1 . Ti1 . N2 . 109.79(4)    yes
P2 . Ti1 . N2 . 36.20(4)    yes
P3 . Ti1 . N2 . 90.48(4)    yes
Co1 . Ti1 . N3 . 139.72(4)    yes
Cl1 . Ti1 . N3 . 90.14(4)    yes
P1 . Ti1 . N3 . 120.29(4)    yes
P2 . Ti1 . N3 . 158.48(4)    yes
P3 . Ti1 . N3 . 41.19(4)    yes
N1 . Ti1 . N2 . 112.09(5)    yes
N1 . Ti1 . N3 . 100.56(5)    yes
N2 . Ti1 . N3 . 127.56(5)    yes
Co1 . Cl1 . Ti1 . 68.851(13)    yes
Ti1 . P1 . Co1 . 61.913(13)    yes
Co1 . P1 . N1 . 103.72(5)    yes
Ti1 . P1 . C9 . 115.95(5)    yes
Co1 . P1 . C9 . 117.44(5)    yes
N1 . P1 . C9 . 106.13(7)    yes
Ti1 . P1 . C12 . 133.40(5)    yes
Co1 . P1 . C12 . 115.04(6)    yes
N1 . P1 . C12 . 107.66(7)    yes
C9 . P1 . C12 . 106.13(7)    yes
Ti1 . P2 . Co1 . 61.805(12)    yes
Co1 . P2 . N2 . 105.22(4)    yes
Ti1 . P2 . C23 . 121.35(5)    yes
Co1 . P2 . C23 . 116.08(5)    yes
N2 . P2 . C23 . 106.84(7)    yes
Ti1 . P2 . C26 . 128.58(5)    yes
Co1 . P2 . C26 . 115.75(5)    yes
N2 . P2 . C26 . 106.45(7)    yes
C23 . P2 . C26 . 105.80(7)    yes
Ti1 . P3 . N3 . 51.05(4)    yes
Ti1 . P3 . C37 . 130.92(6)    yes
N3 . P3 . C37 . 112.40(7)    yes
Ti1 . P3 . C40 . 121.66(5)    yes
N3 . P3 . C40 . 106.92(7)    yes
C37 . P3 . C40 . 107.18(8)    yes
C44 . O1 . C45 . 112.24(18)    yes
P1 . N1 . Ti1 . 101.37(6)    yes
P1 . N1 . C1 . 129.67(10)    yes
Ti1 . N1 . C1 . 128.49(10)    yes
P2 . N2 . Ti1 . 100.16(6)    yes
P2 . N2 . C15 . 124.20(10)    yes
Ti1 . N2 . C15 . 134.30(10)    yes
P3 . N3 . Ti1 . 87.76(5)    yes
P3 . N3 . C29 . 130.89(10)    yes
Ti1 . N3 . C29 . 141.34(10)    yes
N1 . C1 . C2 . 121.30(14)    yes
N1 . C1 . C8 . 119.31(14)    yes
C2 . C1 . C8 . 119.32(15)    yes
C1 . C2 . C3 . 120.54(15)    yes
C1 . C2 . H21 . 120.4    no
C3 . C2 . H21 . 119.0    no
C2 . C3 . C4 . 120.18(17)    yes
C2 . C3 . C5 . 118.82(16)    yes
C4 . C3 . C5 . 120.96(16)    yes
C3 . C4 . H41 . 110.9    no
C3 . C4 . H42 . 111.1    no
H41 . C4 . H42 . 108.1    no
C3 . C4 . H43 . 110.8    no
H41 . C4 . H43 . 109.6    no
H42 . C4 . H43 . 106.1    no
C3 . C5 . C6 . 121.74(16)    yes
C3 . C5 . H51 . 119.9    no
C6 . C5 . H51 . 118.3    no
C5 . C6 . C7 . 121.51(17)    yes
C5 . C6 . C8 . 118.70(16)    yes
C7 . C6 . C8 . 119.79(18)    yes
C6 . C7 . H71 . 111.3    no
C6 . C7 . H72 . 111.4    no
H71 . C7 . H72 . 107.0    no
C6 . C7 . H73 . 112.0    no
H71 . C7 . H73 . 106.0    no
H72 . C7 . H73 . 108.8    no
C1 . C8 . C6 . 120.86(17)    yes
C1 . C8 . H81 . 118.7    no
C6 . C8 . H81 . 120.4    no
P1 . C9 . C10 . 110.00(11)    yes
P1 . C9 . C11 . 112.65(11)    yes
C10 . C9 . C11 . 109.37(13)    yes
P1 . C9 . H91 . 107.5    no
C10 . C9 . H91 . 107.9    no
C11 . C9 . H91 . 109.3    no
C9 . C10 . H101 . 113.1    no
C9 . C10 . H102 . 110.9    no
H101 . C10 . H102 . 106.7    no
C9 . C10 . H103 . 109.6    no
H101 . C10 . H103 . 108.0    no
H102 . C10 . H103 . 108.4    no
C9 . C11 . H111 . 108.7    no
C9 . C11 . H112 . 111.4    no
H111 . C11 . H112 . 108.4    no
C9 . C11 . H113 . 111.8    no
H111 . C11 . H113 . 107.9    no
H112 . C11 . H113 . 108.5    no
P1 . C12 . C13 . 114.25(12)    yes
P1 . C12 . C14 . 112.72(11)    yes
C13 . C12 . C14 . 111.00(14)    yes
P1 . C12 . H121 . 102.4    no
C13 . C12 . H121 . 107.6    no
C14 . C12 . H121 . 108.2    no
C12 . C13 . H131 . 111.3    no
C12 . C13 . H132 . 110.9    no
H131 . C13 . H132 . 108.7    no
C12 . C13 . H133 . 109.3    no
H131 . C13 . H133 . 108.0    no
H132 . C13 . H133 . 108.6    no
C12 . C14 . H141 . 111.4    no
C12 . C14 . H142 . 110.4    no
H141 . C14 . H142 . 110.1    no
C12 . C14 . H143 . 107.8    no
H141 . C14 . H143 . 107.7    no
H142 . C14 . H143 . 109.4    no
N2 . C15 . C16 . 119.29(13)    yes
N2 . C15 . C22 . 121.71(13)    yes
C16 . C15 . C22 . 118.99(14)    yes
C15 . C16 . C17 . 121.03(15)    yes
C15 . C16 . H161 . 119.2    no
C17 . C16 . H161 . 119.7    no
C16 . C17 . C18 . 120.33(16)    yes
C16 . C17 . C19 . 118.85(16)    yes
C18 . C17 . C19 . 120.82(15)    yes
C17 . C18 . H181 . 111.1    no
C17 . C18 . H182 . 111.9    no
H181 . C18 . H182 . 108.3    no
C17 . C18 . H183 . 112.8    no
H181 . C18 . H183 . 105.1    no
H182 . C18 . H183 . 107.2    no
C17 . C19 . C20 . 121.34(15)    yes
C17 . C19 . H191 . 119.1    no
C20 . C19 . H191 . 119.5    no
C19 . C20 . C21 . 120.88(15)    yes
C19 . C20 . C22 . 119.05(16)    yes
C21 . C20 . C22 . 120.05(17)    yes
C20 . C21 . H211 . 110.1    no
C20 . C21 . H212 . 112.8    no
H211 . C21 . H212 . 105.4    no
C20 . C21 . H213 . 111.1    no
H211 . C21 . H213 . 105.9    no
H212 . C21 . H213 . 111.2    no
C20 . C22 . C15 . 120.74(15)    yes
C20 . C22 . H221 . 120.3    no
C15 . C22 . H221 . 119.0    no
P2 . C23 . C24 . 116.02(11)    yes
P2 . C23 . C25 . 111.89(11)    yes
C24 . C23 . C25 . 110.61(13)    yes
P2 . C23 . H231 . 102.8    no
C24 . C23 . H231 . 107.8    no
C25 . C23 . H231 . 106.9    no
C23 . C24 . H241 . 112.3    no
C23 . C24 . H242 . 112.1    no
H241 . C24 . H242 . 107.3    no
C23 . C24 . H243 . 108.3    no
H241 . C24 . H243 . 108.7    no
H242 . C24 . H243 . 108.0    no
C23 . C25 . H251 . 111.1    no
C23 . C25 . H252 . 112.2    no
H251 . C25 . H252 . 108.1    no
C23 . C25 . H253 . 109.9    no
H251 . C25 . H253 . 108.0    no
H252 . C25 . H253 . 107.4    no
P2 . C26 . C27 . 110.31(11)    yes
P2 . C26 . C28 . 112.02(11)    yes
C27 . C26 . C28 . 109.60(13)    yes
P2 . C26 . H261 . 104.9    no
C27 . C26 . H261 . 109.7    no
C28 . C26 . H261 . 110.2    no
C26 . C27 . H271 . 109.0    no
C26 . C27 . H272 . 109.8    no
H271 . C27 . H272 . 108.9    no
C26 . C27 . H273 . 112.0    no
H271 . C27 . H273 . 110.3    no
H272 . C27 . H273 . 106.9    no
C26 . C28 . H281 . 111.7    no
C26 . C28 . H282 . 110.3    no
H281 . C28 . H282 . 109.5    no
C26 . C28 . H283 . 109.9    no
H281 . C28 . H283 . 106.2    no
H282 . C28 . H283 . 109.1    no
N3 . C29 . C30 . 120.11(13)    yes
N3 . C29 . C36 . 120.71(13)    yes
C30 . C29 . C36 . 119.16(13)    yes
C29 . C30 . C31 . 120.85(14)    yes
C29 . C30 . H301 . 119.5    no
C31 . C30 . H301 . 119.6    no
C30 . C31 . C32 . 120.13(14)    yes
C30 . C31 . C33 . 118.91(14)    yes
C32 . C31 . C33 . 120.95(14)    yes
C31 . C32 . H321 . 110.3    no
C31 . C32 . H322 . 111.3    no
H321 . C32 . H322 . 109.4    no
C31 . C32 . H323 . 109.6    no
H321 . C32 . H323 . 108.8    no
H322 . C32 . H323 . 107.4    no
C31 . C33 . C34 . 121.48(14)    yes
C31 . C33 . H331 . 119.6    no
C34 . C33 . H331 . 118.9    no
C33 . C34 . C35 . 120.51(14)    yes
C33 . C34 . C36 . 118.92(14)    yes
C35 . C34 . C36 . 120.57(14)    yes
C34 . C35 . H351 . 114.1    no
C34 . C35 . H352 . 112.0    no
H351 . C35 . H352 . 105.2    no
C34 . C35 . H353 . 113.1    no
H351 . C35 . H353 . 106.8    no
H352 . C35 . H353 . 104.9    no
C34 . C36 . C29 . 120.68(14)    yes
C34 . C36 . H361 . 119.4    no
C29 . C36 . H361 . 119.9    no
P3 . C37 . C38 . 115.03(12)    yes
P3 . C37 . C39 . 110.50(11)    yes
C38 . C37 . C39 . 111.79(14)    yes
P3 . C37 . H371 . 103.5    no
C38 . C37 . H371 . 108.0    no
C39 . C37 . H371 . 107.4    no
C37 . C38 . H381 . 111.7    no
C37 . C38 . H382 . 111.0    no
H381 . C38 . H382 . 108.1    no
C37 . C38 . H383 . 109.8    no
H381 . C38 . H383 . 107.1    no
H382 . C38 . H383 . 109.0    no
C37 . C39 . H391 . 111.3    no
C37 . C39 . H392 . 109.8    no
H391 . C39 . H392 . 106.5    no
C37 . C39 . H393 . 110.6    no
H391 . C39 . H393 . 109.4    no
H392 . C39 . H393 . 109.0    no
P3 . C40 . C41 . 109.06(11)    yes
P3 . C40 . C42 . 111.14(11)    yes
C41 . C40 . C42 . 111.20(14)    yes
P3 . C40 . H401 . 107.4    no
C41 . C40 . H401 . 107.9    no
C42 . C40 . H401 . 110.0    no
C40 . C41 . H411 . 112.2    no
C40 . C41 . H412 . 110.5    no
H411 . C41 . H412 . 109.2    no
C40 . C41 . H413 . 110.1    no
H411 . C41 . H413 . 106.8    no
H412 . C41 . H413 . 107.9    no
C40 . C42 . H421 . 109.2    no
C40 . C42 . H422 . 111.4    no
H421 . C42 . H422 . 108.8    no
C40 . C42 . H423 . 110.8    no
H421 . C42 . H423 . 108.4    no
H422 . C42 . H423 . 108.2    no
C44 . C43 . H431 . 110.3    no
C44 . C43 . H432 . 109.2    no
H431 . C43 . H432 . 110.0    no
C44 . C43 . H433 . 111.7    no
H431 . C43 . H433 . 108.2    no
H432 . C43 . H433 . 107.4    no
C43 . C44 . O1 . 108.6(2)    yes
C43 . C44 . H441 . 110.6    no
O1 . C44 . H441 . 109.2    no
C43 . C44 . H442 . 111.6    no
O1 . C44 . H442 . 108.6    no
H441 . C44 . H442 . 108.3    no
O1 . C45 . C46 . 108.9(2)    yes
O1 . C45 . H451 . 108.3    no
C46 . C45 . H451 . 111.4    no
O1 . C45 . H452 . 109.3    no
C46 . C45 . H452 . 110.0    no
H451 . C45 . H452 . 108.9    no
C45 . C46 . H461 . 108.8    no
C45 . C46 . H462 . 111.0    no
H461 . C46 . H462 . 107.4    no
C45 . C46 . H463 . 111.7    no
H461 . C46 . H463 . 109.4    no
H462 . C46 . H463 . 108.5    no


_iucr_refine_instructions_details_constraints
;
#
# Punched on 27/02/14 at 15:06:32
#
#LIST     12                                                                    
BLOCK SCALE X'S, U'S 
RIDE C   (   2,X'S) H   (  21,X'S) 
RIDE C   (   4,X'S) H   (  41,X'S) H   (  42,X'S) H   (  43,X'S) 
RIDE C   (   5,X'S) H   (  51,X'S) 
RIDE C   (   7,X'S) H   (  71,X'S) H   (  72,X'S) H   (  73,X'S) 
RIDE C   (   8,X'S) H   (  81,X'S) 
RIDE C   (   9,X'S) H   (  91,X'S) 
RIDE C   (  10,X'S) H   ( 101,X'S) H   ( 102,X'S) H   ( 103,X'S) 
RIDE C   (  11,X'S) H   ( 111,X'S) H   ( 112,X'S) H   ( 113,X'S) 
RIDE C   (  12,X'S) H   ( 121,X'S) 
RIDE C   (  13,X'S) H   ( 131,X'S) H   ( 132,X'S) H   ( 133,X'S) 
RIDE C   (  14,X'S) H   ( 141,X'S) H   ( 142,X'S) H   ( 143,X'S) 
RIDE C   (  16,X'S) H   ( 161,X'S) 
RIDE C   (  18,X'S) H   ( 181,X'S) H   ( 182,X'S) H   ( 183,X'S) 
RIDE C   (  19,X'S) H   ( 191,X'S) 
RIDE C   (  21,X'S) H   ( 211,X'S) H   ( 212,X'S) H   ( 213,X'S) 
RIDE C   (  22,X'S) H   ( 221,X'S) 
RIDE C   (  23,X'S) H   ( 231,X'S) 
RIDE C   (  24,X'S) H   ( 241,X'S) H   ( 242,X'S) H   ( 243,X'S) 
RIDE C   (  25,X'S) H   ( 251,X'S) H   ( 252,X'S) H   ( 253,X'S) 
RIDE C   (  26,X'S) H   ( 261,X'S) 
RIDE C   (  27,X'S) H   ( 271,X'S) H   ( 272,X'S) H   ( 273,X'S) 
RIDE C   (  28,X'S) H   ( 281,X'S) H   ( 282,X'S) H   ( 283,X'S) 
RIDE C   (  30,X'S) H   ( 301,X'S) 
RIDE C   (  32,X'S) H   ( 321,X'S) H   ( 322,X'S) H   ( 323,X'S) 
RIDE C   (  33,X'S) H   ( 331,X'S) 
RIDE C   (  35,X'S) H   ( 351,X'S) H   ( 352,X'S) H   ( 353,X'S) 
RIDE C   (  36,X'S) H   ( 361,X'S) 
RIDE C   (  37,X'S) H   ( 371,X'S) 
RIDE C   (  38,X'S) H   ( 381,X'S) H   ( 382,X'S) H   ( 383,X'S) 
RIDE C   (  39,X'S) H   ( 391,X'S) H   ( 392,X'S) H   ( 393,X'S) 
RIDE C   (  40,X'S) H   ( 401,X'S) 
RIDE C   (  41,X'S) H   ( 411,X'S) H   ( 412,X'S) H   ( 413,X'S) 
RIDE C   (  42,X'S) H   ( 421,X'S) H   ( 422,X'S) H   ( 423,X'S) 
RIDE C   (  43,X'S) H   ( 431,X'S) H   ( 432,X'S) H   ( 433,X'S) 
RIDE C   (  44,X'S) H   ( 441,X'S) H   ( 442,X'S) 
RIDE C   (  45,X'S) H   ( 451,X'S) H   ( 452,X'S) 
RIDE C   (  46,X'S) H   ( 461,X'S) H   ( 462,X'S) H   ( 463,X'S) 
END                                                                             
;


_iucr_refine_instructions_details_restraints
;
#
# Punched on 27/02/14 at 15:06:32
#
#LIST     16                                                                    
NO 
REM   HREST   START (DO NOT REMOVE THIS LINE) 
REM   HREST   END (DO NOT REMOVE THIS LINE) 
END                                                                             
;

####

data_3 
_audit_creation_date        "2014-02-26"
_audit_creation_method CRYSTALS_ver_14.52

_oxford_structure_analysis_title  'bw_326_1_0m in P2(1)2(1)2(1)'
_chemical_name_systematic         ?
_chemical_melting_point           ?

_cell_length_a                    14.3305(4)
_cell_length_b                    15.8386(5)
_cell_length_c                    40.4713(12)
_cell_angle_alpha                 90
_cell_angle_beta                  90
_cell_angle_gamma                 90
_cell_volume                      9186.0(3)
 
_symmetry_cell_setting            'orthorhombic' 
_symmetry_space_group_name_H-M    'P 21 21 21 ' 
_symmetry_space_group_name_Hall   'P 2ac 2ab ' 
loop_
 _symmetry_equiv_pos_as_xyz
 'x,y,z'
 'x+1/2,-y+1/2,-z'
 '-x,y+1/2,-z+1/2'
 '-x+1/2,-y,z+1/2'

loop_
_atom_type_symbol
_atom_type_scat_dispersion_real
_atom_type_scat_dispersion_imag
_atom_type_scat_Cromer_Mann_a1
_atom_type_scat_Cromer_Mann_b1
_atom_type_scat_Cromer_Mann_a2
_atom_type_scat_Cromer_Mann_b2
_atom_type_scat_Cromer_Mann_a3
_atom_type_scat_Cromer_Mann_b3
_atom_type_scat_Cromer_Mann_a4
_atom_type_scat_Cromer_Mann_b4
_atom_type_scat_Cromer_Mann_c
_atom_type_scat_source  
 C       0.0033   0.0016   2.3100  20.8439   1.0200  10.2075   1.5886   0.5687
   0.8650  51.6512   0.2156 'International Tables Vol C 4.2.6.8 and 6.1.1.4'
 H       0.0000   0.0000   0.4930  10.5109   0.3229  26.1257   0.1402   3.1424
   0.0408  57.7998   0.0030 'International Tables Vol C 4.2.6.8 and 6.1.1.4'
 N       0.0061   0.0033  12.2126   0.0057   3.1322   9.8933   2.0125  28.9975
   1.1663   0.5826 -11.5290 'International Tables Vol C 4.2.6.8 and 6.1.1.4'
 P       0.1023   0.0942   6.4345   1.9067   4.1791  27.1570   1.7800   0.5260
   1.4908  68.1645   1.1149 'International Tables Vol C 4.2.6.8 and 6.1.1.4'
 Ti      0.2776   0.4457   9.7595   7.8508   7.3558   0.5000   1.6991  35.6338
   1.9021 116.1050   1.2807 'International Tables Vol C 4.2.6.8 and 6.1.1.4'
 Co      0.3494   0.9721  12.2841   4.2791   7.3409   0.2784   4.0034  13.5359
   2.3488  71.1692   1.0118 'International Tables Vol C 4.2.6.8 and 6.1.1.4'
 I      -0.4742   1.8119  20.1472   4.3470  18.9949   0.3814   7.5138  27.7660
   2.2735  66.8776   4.0712 'International Tables Vol C 4.2.6.8 and 6.1.1.4'
 
 
_cell_formula_units_Z                    8

# Given Formula = C42 H69 Co1 I1 N3 P3 Ti1 
# Dc =      1.36 Fooo =   3912.00 Mu =     13.42 M =   1885.38
# Found Formula = C42 H69 Co1 I1 N3 P3 Ti1 
# Dc =      1.36 FOOO =   3912.00 Mu =     13.42 M =   1885.38

_chemical_formula_sum             'C42 H69 Co1 I1 N3 P3 Ti1'
_chemical_formula_moiety          'C42 H69 Co1 I1 N3 P3 Ti1'
_chemical_compound_source                ?
_chemical_formula_weight            942.69
 
 
_cell_measurement_reflns_used         9052
_cell_measurement_theta_min              2
_cell_measurement_theta_max             29
_cell_measurement_temperature          120
 
_exptl_crystal_description        'prism' 
_exptl_crystal_colour             'red' 
_exptl_crystal_size_min           0.160 
_exptl_crystal_size_mid           0.230 
_exptl_crystal_size_max           0.340 
 
_exptl_crystal_density_diffrn     1.363 
_exptl_crystal_density_meas       ? 
_exptl_crystal_density_method     'not measured' 
# Non-dispersive F(000): 
_exptl_crystal_F_000              3912 
_exptl_absorpt_coefficient_mu     1.342 
 
# Sheldrick geometric approximatio 0.73 0.81 
_exptl_absorpt_correction_type    numerical 
_exptl_absorpt_process_details 
; 
 Analytical Absorption (De Meulenaer & Tompa, 1965) 
; 
_exptl_absorpt_correction_T_min   0.73 
_exptl_absorpt_correction_T_max   0.81 
_diffrn_measurement_device_type   'Bruker Kappa Apex2' 
_diffrn_measurement_device        'Area' 
_diffrn_radiation_monochromator   'graphite' 
_diffrn_radiation_type            'Mo K\a'
_diffrn_radiation_wavelength           0.71073
_diffrn_measurement_method        '\f & \w scans' 
 
# If a reference occurs more than once, delete the author 
# and date from subsequent references. 
_computing_data_collection        'Apex2 (Bruker AXS, 2006)' 
_computing_cell_refinement        'Apex2 (Bruker AXS, 2006)' 
_computing_data_reduction         'Apex2 (Bruker AXS, 2006)' 
_computing_structure_solution     'SIR92 (Altomare et al., 1994)' 
_computing_structure_refinement   'CRYSTALS (Betteridge et al., 2003)' 
_computing_publication_material   'CRYSTALS (Betteridge et al., 2003)' 
_computing_molecular_graphics     'CAMERON (Watkin et al., 1996)' 
 
_diffrn_standards_interval_time   . 
_diffrn_standards_interval_count  . 
_diffrn_standards_number          0 
_diffrn_standards_decay_%         ? 
 
_diffrn_ambient_temperature        120
_diffrn_reflns_number             76887 
_reflns_number_total              23799 
_diffrn_reflns_av_R_equivalents   0.057 
# Number of reflections without Friedels Law is 23799 
# Number of reflections with Friedels Law is 13266 
# Theoretical number of reflections is about 12286 
 
 
_diffrn_reflns_theta_min          1.381 
_diffrn_reflns_theta_max          29.063 
_diffrn_measured_fraction_theta_max 0.995 
 
_diffrn_reflns_theta_full         28.482 
_diffrn_measured_fraction_theta_full 0.997 
 
 
_diffrn_reflns_limit_h_min        -16 
_diffrn_reflns_limit_h_max        19 
_diffrn_reflns_limit_k_min        -21 
_diffrn_reflns_limit_k_max        21 
_diffrn_reflns_limit_l_min        -44 
_diffrn_reflns_limit_l_max        55 
_reflns_limit_h_min               -19 
_reflns_limit_h_max               19 
_reflns_limit_k_min               0 
_reflns_limit_k_max               21 
_reflns_limit_l_min               0 
_reflns_limit_l_max               55 
 
_oxford_diffrn_Wilson_B_factor    0.00 
_oxford_diffrn_Wilson_scale       0.00 
 
_atom_sites_solution_primary      direct #heavy,direct,difmap,geom
# _atom_sites_solution_secondary  difmap
_atom_sites_solution_hydrogens    difmap
 
_refine_diff_density_min          -0.77 
_refine_diff_density_max          1.33 
 
 
# The current dictionary definitions do not cover the 
# situation where the reflections used for refinement were 
# selected by a user-defined sigma threshold 
 
 
# The values actually used during refinement 
_oxford_reflns_threshold_expression_ref     I>-10.0\s(I)
_refine_ls_number_reflns          23799 
_refine_ls_number_restraints      0 
_refine_ls_number_parameters      919 
_oxford_refine_ls_R_factor_ref    0.0582 
_refine_ls_wR_factor_ref          0.0910 
_refine_ls_goodness_of_fit_ref    0.9695 
_refine_ls_shift/su_max           0.0059954 
_refine_ls_shift/su_mean          0.0001792 
 
 
# The values computed with all filters except I/sigma 
_oxford_reflns_number_all         23799 
_refine_ls_R_factor_all           0.0582 
_refine_ls_wR_factor_all          0.0910 
 
# The values computed with a 2 sigma cutoff - a la SHELX 
_reflns_threshold_expression      I>2.0\s(I)
_reflns_number_gt                 18810 
_refine_ls_R_factor_gt            0.0415 
_refine_ls_wR_factor_gt           0.0862 
 
_refine_ls_abs_structure_Flack    0.059(11) 
_refine_ls_abs_structure_details  'Flack (1983), 10533 Friedel-pairs' 
# choose from: rm (reference molecule of known chirality), 
# ad (anomolous dispersion - Flack), rmad (rm and ad), 
# syn (from synthesis), unk (unknown) or . (not applicable). 
_chemical_absolute_configuration  'ad' 
 
 
_refine_ls_structure_factor_coef  Fsqd 
_refine_ls_matrix_type            full
_refine_ls_hydrogen_treatment     constr         #undef, noref, refall,
                                                 # refxyz, refU, constr or mixed
_refine_ls_weighting_scheme       calc 
_refine_ls_weighting_details 
;
 Method= Modified Sheldrick 
 w=1/[\s^2^(F^2^) + ( 0.03P)^2^ + 7.30P] 
 ,where P=(max(Fo^2^,0) + 2Fc^2^)/3 
;
# Insert your own references if required - in alphabetical order 
_publ_section_references 
; 
Altomare, A., Cascarano, G., Giacovazzo, C., Guagliardi, A., Burla, M.C., 
Polidori, G. & Camalli, M. (1994). J. Appl. Cryst. 27, 435. 
 
Betteridge, P.W., Carruthers, J.R., Cooper, R.I., 
Prout, K. & Watkin, D.J. (2003). J. Appl. Cryst. 36, 1487. 
 
Bruker Analytical X-ray Systems, Inc., 2006. <i>Apex2</i>, 
Version 2 User Manual, M86-E01078, Madison, WI. 
 
De Meulenaer, J. & Tompa, H. (1965). Acta Cryst. 19, 1014. 
 
Flack, H. D. (1983). Acta Cryst. A39, 876-881. 
 
Watkin, D.J., Prout, C.K. & Pearce, L.J. (1996). CAMERON, Chemical 
Crystallography Laboratory, Oxford, UK. 
; 

# Uequiv = arithmetic mean of Ui i.e. Ueqiv = (U1+U2+U3)/3

# Replace last . with number of unfound hydrogen atoms attached to an atom.

# ..._refinement_flags_... 
# . no refinement constraints           S special position constraint on site
# G rigid group refinement of site      R riding atom
# D distance or angle restraint on site T thermal displacement constraints
# U Uiso or Uij restraint (rigid bond)  P partial occupancy constraint


loop_
_atom_site_label
_atom_site_type_symbol
_atom_site_fract_x
_atom_site_fract_y
_atom_site_fract_z
_atom_site_U_iso_or_equiv
_atom_site_occupancy
_atom_site_adp_type
_atom_site_refinement_flags_posn
_atom_site_refinement_flags_adp
_atom_site_refinement_flags_occupancy
_atom_site_disorder_assembly
_atom_site_disorder_group
_atom_site_attached_hydrogens
Co1 Co 0.53933(4) 0.27673(3) 0.430495(12) 0.0132 1.0000 Uani . . . . . . 
Co101 Co 0.03968(4) 0.69779(3) 0.430509(12) 0.0141 1.0000 Uani . . . . . . 
Ti1 Ti 0.46125(5) 0.27342(4) 0.381611(15) 0.0109 1.0000 Uani . . . . . . 
Ti101 Ti -0.03701(5) 0.70047(4) 0.381346(15) 0.0111 1.0000 Uani . . . . . . 
I1 I 0.62074(2) 0.362451(17) 0.474413(7) 0.0289 1.0000 Uani . . . . . . 
I101 I 0.11931(2) 0.613875(17) 0.475360(7) 0.0314 1.0000 Uani . . . . . . 
P1 P 0.39249(7) 0.23361(6) 0.44029(2) 0.0134 1.0000 Uani . . . . . . 
P2 P 0.62426(7) 0.19915(5) 0.39473(2) 0.0126 1.0000 Uani . . . . . . 
P3 P 0.39232(7) 0.33728(5) 0.32741(2) 0.0132 1.0000 Uani . . . . . . 
P101 P 0.12499(7) 0.77487(5) 0.39485(2) 0.0138 1.0000 Uani . . . . . . 
P102 P -0.10765(7) 0.74062(6) 0.43967(2) 0.0146 1.0000 Uani . . . . . . 
P103 P -0.10529(7) 0.63587(5) 0.32710(2) 0.0137 1.0000 Uani . . . . . . 
N1 N 0.3482(2) 0.22230(18) 0.40235(7) 0.0132 1.0000 Uani . . . . . . 
N2 N 0.5545(2) 0.19720(18) 0.36175(7) 0.0143 1.0000 Uani . . . . . . 
N3 N 0.4512(2) 0.38385(18) 0.35836(7) 0.0129 1.0000 Uani . . . . . . 
N101 N 0.0573(2) 0.77501(18) 0.36140(7) 0.0146 1.0000 Uani . . . . . . 
N102 N -0.1500(2) 0.75367(18) 0.40127(7) 0.0126 1.0000 Uani . . . . . . 
N103 N -0.0490(2) 0.58961(18) 0.35883(7) 0.0133 1.0000 Uani . . . . . . 
C1 C 0.2623(3) 0.1848(2) 0.39269(9) 0.0143 1.0000 Uani . . . . . . 
C2 C 0.1903(3) 0.1660(2) 0.41436(10) 0.0176 1.0000 Uani . . . . . . 
C3 C 0.1073(3) 0.1292(2) 0.40353(9) 0.0173 1.0000 Uani . . . . . . 
C4 C 0.0303(3) 0.1130(3) 0.42772(12) 0.0276 1.0000 Uani . . . . . . 
C5 C 0.0979(3) 0.1083(2) 0.37042(10) 0.0210 1.0000 Uani . . . . . . 
C6 C 0.1692(3) 0.1250(2) 0.34819(10) 0.0205 1.0000 Uani . . . . . . 
C7 C 0.1602(3) 0.1002(3) 0.31239(11) 0.0304 1.0000 Uani . . . . . . 
C8 C 0.2506(3) 0.1636(2) 0.35920(9) 0.0155 1.0000 Uani . . . . . . 
C9 C 0.3214(3) 0.3133(2) 0.46203(9) 0.0199 1.0000 Uani . . . . . . 
C10 C 0.3304(3) 0.3989(3) 0.44558(12) 0.0321 1.0000 Uani . . . . . . 
C11 C 0.3466(4) 0.3212(3) 0.49877(11) 0.0396 1.0000 Uani . . . . . . 
C12 C 0.3786(3) 0.1333(2) 0.46322(9) 0.0202 1.0000 Uani . . . . . . 
C13 C 0.3982(3) 0.0590(2) 0.44057(11) 0.0255 1.0000 Uani . . . . . . 
C14 C 0.4434(4) 0.1298(3) 0.49363(10) 0.0341 1.0000 Uani . . . . . . 
C15 C 0.5575(3) 0.1457(2) 0.33325(9) 0.0165 1.0000 Uani . . . . . . 
C16 C 0.4844(3) 0.0899(2) 0.32761(10) 0.0229 1.0000 Uani . . . . . . 
C17 C 0.4800(3) 0.0430(3) 0.29879(11) 0.0307 1.0000 Uani . . . . . . 
C18 C 0.3998(4) -0.0173(3) 0.29304(15) 0.0486 1.0000 Uani . . . . . . 
C19 C 0.5504(4) 0.0526(3) 0.27565(11) 0.0336 1.0000 Uani . . . . . . 
C20 C 0.6256(3) 0.1050(3) 0.28083(10) 0.0281 1.0000 Uani . . . . . . 
C21 C 0.7042(4) 0.1120(3) 0.25608(12) 0.0452 1.0000 Uani . . . . . . 
C22 C 0.6292(3) 0.1518(2) 0.30997(9) 0.0224 1.0000 Uani . . . . . . 
C23 C 0.6531(3) 0.0873(2) 0.40417(10) 0.0177 1.0000 Uani . . . . . . 
C24 C 0.7300(3) 0.0508(3) 0.38213(10) 0.0246 1.0000 Uani . . . . . . 
C25 C 0.6751(3) 0.0710(3) 0.44032(10) 0.0260 1.0000 Uani . . . . . . 
C26 C 0.7360(3) 0.2515(2) 0.38377(10) 0.0198 1.0000 Uani . . . . . . 
C27 C 0.7184(3) 0.3413(2) 0.37184(11) 0.0254 1.0000 Uani . . . . . . 
C28 C 0.8036(3) 0.2514(3) 0.41274(11) 0.0255 1.0000 Uani . . . . . . 
C29 C 0.4710(3) 0.4699(2) 0.36266(9) 0.0140 1.0000 Uani . . . . . . 
C30 C 0.4574(3) 0.5312(2) 0.33794(9) 0.0167 1.0000 Uani . . . . . . 
C31 C 0.4769(3) 0.6154(2) 0.34350(10) 0.0183 1.0000 Uani . . . . . . 
C32 C 0.4595(3) 0.6801(3) 0.31685(11) 0.0304 1.0000 Uani . . . . . . 
C33 C 0.5126(3) 0.6406(2) 0.37411(10) 0.0201 1.0000 Uani . . . . . . 
C34 C 0.5284(3) 0.5813(2) 0.39879(9) 0.0170 1.0000 Uani . . . . . . 
C35 C 0.5694(3) 0.6077(3) 0.43127(10) 0.0273 1.0000 Uani . . . . . . 
C36 C 0.5074(2) 0.4964(2) 0.39288(9) 0.0149 1.0000 Uani . . . . . . 
C37 C 0.4534(3) 0.3516(2) 0.28719(9) 0.0215 1.0000 Uani . . . . . . 
C38 C 0.5579(3) 0.3668(3) 0.29205(11) 0.0275 1.0000 Uani . . . . . . 
C39 C 0.4377(4) 0.2725(3) 0.26588(10) 0.0326 1.0000 Uani . . . . . . 
C40 C 0.2814(3) 0.3954(2) 0.32109(10) 0.0197 1.0000 Uani . . . . . . 
C41 C 0.2325(3) 0.4089(3) 0.35371(11) 0.0253 1.0000 Uani . . . . . . 
C42 C 0.2182(3) 0.3486(3) 0.29676(11) 0.0299 1.0000 Uani . . . . . . 
C101 C 0.0618(3) 0.8250(2) 0.33270(10) 0.0191 1.0000 Uani . . . . . . 
C102 C 0.1343(3) 0.8173(2) 0.30974(9) 0.0224 1.0000 Uani . . . . . . 
C103 C 0.1328(3) 0.8647(3) 0.28035(10) 0.0299 1.0000 Uani . . . . . . 
C104 C 0.2090(4) 0.8539(4) 0.25519(12) 0.0484 1.0000 Uani . . . . . . 
C105 C 0.0578(4) 0.9173(3) 0.27417(10) 0.0334 1.0000 Uani . . . . . . 
C106 C -0.0145(3) 0.9270(3) 0.29705(11) 0.0320 1.0000 Uani . . . . . . 
C107 C -0.0939(4) 0.9879(3) 0.29114(15) 0.0535 1.0000 Uani . . . . . . 
C108 C -0.0107(3) 0.8814(2) 0.32637(11) 0.0242 1.0000 Uani . . . . . . 
C109 C 0.2377(3) 0.7239(2) 0.38512(10) 0.0194 1.0000 Uani . . . . . . 
C110 C 0.2215(3) 0.6337(3) 0.37385(11) 0.0268 1.0000 Uani . . . . . . 
C111 C 0.3034(3) 0.7259(3) 0.41476(11) 0.0239 1.0000 Uani . . . . . . 
C112 C 0.1515(3) 0.8872(2) 0.40339(9) 0.0167 1.0000 Uani . . . . . . 
C113 C 0.2290(3) 0.9239(2) 0.38144(10) 0.0225 1.0000 Uani . . . . . . 
C114 C 0.1715(3) 0.9047(3) 0.43985(10) 0.0248 1.0000 Uani . . . . . . 
C115 C -0.2352(2) 0.7908(2) 0.39127(9) 0.0133 1.0000 Uani . . . . . . 
C116 C -0.2466(3) 0.8118(2) 0.35823(10) 0.0174 1.0000 Uani . . . . . . 
C117 C -0.3279(3) 0.8493(2) 0.34653(10) 0.0208 1.0000 Uani . . . . . . 
C118 C -0.3355(3) 0.8742(3) 0.31090(11) 0.0309 1.0000 Uani . . . . . . 
C119 C -0.3999(3) 0.8658(2) 0.36883(11) 0.0226 1.0000 Uani . . . . . . 
C120 C -0.3902(3) 0.8462(2) 0.40205(10) 0.0209 1.0000 Uani . . . . . . 
C121 C -0.4700(3) 0.8627(3) 0.42567(11) 0.0297 1.0000 Uani . . . . . . 
C122 C -0.3089(3) 0.8083(2) 0.41323(9) 0.0162 1.0000 Uani . . . . . . 
C123 C -0.1214(3) 0.8387(2) 0.46388(9) 0.0227 1.0000 Uani . . . . . . 
C124 C -0.1050(3) 0.9160(2) 0.44188(11) 0.0261 1.0000 Uani . . . . . . 
C125 C -0.0582(4) 0.8420(3) 0.49370(10) 0.0351 1.0000 Uani . . . . . . 
C126 C -0.1808(3) 0.6601(2) 0.46068(10) 0.0222 1.0000 Uani . . . . . . 
C127 C -0.1691(3) 0.5751(2) 0.44329(11) 0.0294 1.0000 Uani . . . . . . 
C128 C -0.1587(4) 0.6503(3) 0.49734(11) 0.0428 1.0000 Uani . . . . . . 
C129 C -0.0277(3) 0.5028(2) 0.36294(10) 0.0154 1.0000 Uani . . . . . . 
C130 C -0.0428(3) 0.4427(2) 0.33861(10) 0.0168 1.0000 Uani . . . . . . 
C131 C -0.0226(3) 0.3574(2) 0.34437(10) 0.0193 1.0000 Uani . . . . . . 
C132 C -0.0425(3) 0.2923(2) 0.31800(11) 0.0278 1.0000 Uani . . . . . . 
C133 C 0.0135(3) 0.3343(2) 0.37443(10) 0.0196 1.0000 Uani . . . . . . 
C134 C 0.0301(3) 0.3934(2) 0.39916(10) 0.0191 1.0000 Uani . . . . . . 
C135 C 0.0738(3) 0.3664(3) 0.43139(11) 0.0297 1.0000 Uani . . . . . . 
C136 C 0.0096(3) 0.4768(2) 0.39319(9) 0.0159 1.0000 Uani . . . . . . 
C137 C -0.2176(3) 0.5788(2) 0.32013(10) 0.0185 1.0000 Uani . . . . . . 
C138 C -0.2674(3) 0.5666(3) 0.35284(10) 0.0242 1.0000 Uani . . . . . . 
C139 C -0.2784(3) 0.6263(3) 0.29557(12) 0.0313 1.0000 Uani . . . . . . 
C140 C -0.0419(3) 0.6205(2) 0.28743(9) 0.0221 1.0000 Uani . . . . . . 
C141 C 0.0617(3) 0.6032(3) 0.29340(11) 0.0285 1.0000 Uani . . . . . . 
C142 C -0.0550(4) 0.6981(3) 0.26563(10) 0.0346 1.0000 Uani . . . . . . 
H21 H 0.1979 0.1782 0.4363 0.0210 1.0000 Uiso R . . . . . 
H41 H 0.0017 0.1642 0.4339 0.0409 1.0000 Uiso R . . . . . 
H42 H 0.0514 0.0867 0.4470 0.0409 1.0000 Uiso R . . . . . 
H43 H -0.0146 0.0772 0.4179 0.0417 1.0000 Uiso R . . . . . 
H51 H 0.0438 0.0835 0.3625 0.0244 1.0000 Uiso R . . . . . 
H71 H 0.1688 0.0413 0.3103 0.0457 1.0000 Uiso R . . . . . 
H72 H 0.2078 0.1278 0.2990 0.0455 1.0000 Uiso R . . . . . 
H73 H 0.1005 0.1139 0.3039 0.0464 1.0000 Uiso R . . . . . 
H81 H 0.2986 0.1749 0.3442 0.0197 1.0000 Uiso R . . . . . 
H91 H 0.2563 0.2942 0.4606 0.0241 1.0000 Uiso R . . . . . 
H101 H 0.3217 0.3939 0.4219 0.0476 1.0000 Uiso R . . . . . 
H102 H 0.3906 0.4234 0.4503 0.0479 1.0000 Uiso R . . . . . 
H103 H 0.2827 0.4357 0.4539 0.0478 1.0000 Uiso R . . . . . 
H111 H 0.4114 0.3333 0.5013 0.0591 1.0000 Uiso R . . . . . 
H112 H 0.3120 0.3686 0.5084 0.0589 1.0000 Uiso R . . . . . 
H113 H 0.3310 0.2702 0.5106 0.0589 1.0000 Uiso R . . . . . 
H121 H 0.3136 0.1302 0.4706 0.0238 1.0000 Uiso R . . . . . 
H131 H 0.3906 0.0085 0.4529 0.0376 1.0000 Uiso R . . . . . 
H132 H 0.4620 0.0617 0.4329 0.0380 1.0000 Uiso R . . . . . 
H133 H 0.3562 0.0564 0.4220 0.0373 1.0000 Uiso R . . . . . 
H141 H 0.5076 0.1393 0.4874 0.0510 1.0000 Uiso R . . . . . 
H142 H 0.4380 0.0762 0.5050 0.0513 1.0000 Uiso R . . . . . 
H143 H 0.4266 0.1731 0.5090 0.0514 1.0000 Uiso R . . . . . 
H161 H 0.4375 0.0833 0.3439 0.0275 1.0000 Uiso R . . . . . 
H181 H 0.3722 -0.0088 0.2719 0.0731 1.0000 Uiso R . . . . . 
H182 H 0.3532 -0.0093 0.3095 0.0728 1.0000 Uiso R . . . . . 
H183 H 0.4199 -0.0740 0.2939 0.0728 1.0000 Uiso R . . . . . 
H191 H 0.5484 0.0219 0.2561 0.0400 1.0000 Uiso R . . . . . 
H211 H 0.6891 0.1520 0.2395 0.0672 1.0000 Uiso R . . . . . 
H212 H 0.7130 0.0582 0.2458 0.0672 1.0000 Uiso R . . . . . 
H213 H 0.7612 0.1288 0.2669 0.0668 1.0000 Uiso R . . . . . 
H221 H 0.6806 0.1875 0.3137 0.0266 1.0000 Uiso R . . . . . 
H231 H 0.5955 0.0558 0.3991 0.0207 1.0000 Uiso R . . . . . 
H241 H 0.7892 0.0765 0.3874 0.0361 1.0000 Uiso R . . . . . 
H242 H 0.7162 0.0618 0.3593 0.0370 1.0000 Uiso R . . . . . 
H243 H 0.7350 -0.0090 0.3852 0.0369 1.0000 Uiso R . . . . . 
H251 H 0.6761 0.0109 0.4435 0.0390 1.0000 Uiso R . . . . . 
H252 H 0.6298 0.0947 0.4544 0.0389 1.0000 Uiso R . . . . . 
H253 H 0.7349 0.0925 0.4456 0.0388 1.0000 Uiso R . . . . . 
H261 H 0.7628 0.2194 0.3653 0.0234 1.0000 Uiso R . . . . . 
H271 H 0.6774 0.3418 0.3536 0.0377 1.0000 Uiso R . . . . . 
H272 H 0.6910 0.3756 0.3888 0.0377 1.0000 Uiso R . . . . . 
H273 H 0.7757 0.3667 0.3649 0.0376 1.0000 Uiso R . . . . . 
H281 H 0.8593 0.2814 0.4072 0.0378 1.0000 Uiso R . . . . . 
H282 H 0.8219 0.1954 0.4189 0.0377 1.0000 Uiso R . . . . . 
H283 H 0.7757 0.2782 0.4317 0.0383 1.0000 Uiso R . . . . . 
H301 H 0.4342 0.5124 0.3174 0.0200 1.0000 Uiso R . . . . . 
H321 H 0.4947 0.7310 0.3203 0.0465 1.0000 Uiso R . . . . . 
H322 H 0.4747 0.6558 0.2954 0.0463 1.0000 Uiso R . . . . . 
H323 H 0.3942 0.6961 0.3162 0.0465 1.0000 Uiso R . . . . . 
H331 H 0.5267 0.6961 0.3779 0.0241 1.0000 Uiso R . . . . . 
H351 H 0.5372 0.6545 0.4403 0.0415 1.0000 Uiso R . . . . . 
H352 H 0.6324 0.6223 0.4286 0.0421 1.0000 Uiso R . . . . . 
H353 H 0.5642 0.5613 0.4460 0.0420 1.0000 Uiso R . . . . . 
H361 H 0.5158 0.4576 0.4089 0.0174 1.0000 Uiso R . . . . . 
H371 H 0.4283 0.4006 0.2758 0.0249 1.0000 Uiso R . . . . . 
H381 H 0.5840 0.3216 0.3044 0.0407 1.0000 Uiso R . . . . . 
H382 H 0.5690 0.4184 0.3035 0.0405 1.0000 Uiso R . . . . . 
H383 H 0.5886 0.3678 0.2711 0.0405 1.0000 Uiso R . . . . . 
H391 H 0.4679 0.2250 0.2753 0.0487 1.0000 Uiso R . . . . . 
H392 H 0.4631 0.2828 0.2448 0.0483 1.0000 Uiso R . . . . . 
H393 H 0.3728 0.2602 0.2634 0.0488 1.0000 Uiso R . . . . . 
H401 H 0.2961 0.4503 0.3121 0.0238 1.0000 Uiso R . . . . . 
H411 H 0.1748 0.4384 0.3503 0.0377 1.0000 Uiso R . . . . . 
H412 H 0.2201 0.3536 0.3634 0.0365 1.0000 Uiso R . . . . . 
H413 H 0.2711 0.4421 0.3683 0.0371 1.0000 Uiso R . . . . . 
H421 H 0.2055 0.2924 0.3041 0.0443 1.0000 Uiso R . . . . . 
H422 H 0.2470 0.3457 0.2757 0.0451 1.0000 Uiso R . . . . . 
H423 H 0.1609 0.3777 0.2940 0.0445 1.0000 Uiso R . . . . . 
H1021 H 0.1836 0.7806 0.3139 0.0266 1.0000 Uiso R . . . . . 
H1041 H 0.2626 0.8278 0.2651 0.0730 1.0000 Uiso R . . . . . 
H1042 H 0.1890 0.8199 0.2371 0.0731 1.0000 Uiso R . . . . . 
H1043 H 0.2275 0.9083 0.2473 0.0728 1.0000 Uiso R . . . . . 
H1051 H 0.0560 0.9467 0.2543 0.0404 1.0000 Uiso R . . . . . 
H1071 H -0.1260 0.9722 0.2719 0.0803 1.0000 Uiso R . . . . . 
H1072 H -0.1364 0.9868 0.3091 0.0799 1.0000 Uiso R . . . . . 
H1073 H -0.0704 1.0438 0.2888 0.0795 1.0000 Uiso R . . . . . 
H1081 H -0.0587 0.8899 0.3426 0.0287 1.0000 Uiso R . . . . . 
H1091 H 0.2667 0.7563 0.3677 0.0229 1.0000 Uiso R . . . . . 
H1101 H 0.1812 0.6327 0.3554 0.0398 1.0000 Uiso R . . . . . 
H1102 H 0.1931 0.6023 0.3909 0.0402 1.0000 Uiso R . . . . . 
H1103 H 0.2800 0.6087 0.3678 0.0396 1.0000 Uiso R . . . . . 
H1111 H 0.3199 0.7826 0.4209 0.0358 1.0000 Uiso R . . . . . 
H1112 H 0.3582 0.6952 0.4092 0.0365 1.0000 Uiso R . . . . . 
H1113 H 0.2746 0.6974 0.4334 0.0350 1.0000 Uiso R . . . . . 
H1121 H 0.0941 0.9177 0.3981 0.0198 1.0000 Uiso R . . . . . 
H1131 H 0.2360 0.9822 0.3859 0.0338 1.0000 Uiso R . . . . . 
H1132 H 0.2874 0.8953 0.3857 0.0337 1.0000 Uiso R . . . . . 
H1133 H 0.2147 0.9175 0.3589 0.0339 1.0000 Uiso R . . . . . 
H1141 H 0.1264 0.8796 0.4535 0.0371 1.0000 Uiso R . . . . . 
H1142 H 0.1713 0.9646 0.4434 0.0366 1.0000 Uiso R . . . . . 
H1143 H 0.2311 0.8828 0.4458 0.0371 1.0000 Uiso R . . . . . 
H1161 H -0.1980 0.7992 0.3433 0.0206 1.0000 Uiso R . . . . . 
H1181 H -0.3927 0.8578 0.3015 0.0469 1.0000 Uiso R . . . . . 
H1182 H -0.3290 0.9330 0.3079 0.0458 1.0000 Uiso R . . . . . 
H1183 H -0.2864 0.8490 0.2983 0.0462 1.0000 Uiso R . . . . . 
H1191 H -0.4551 0.8913 0.3613 0.0264 1.0000 Uiso R . . . . . 
H1211 H -0.5161 0.8972 0.4155 0.0436 1.0000 Uiso R . . . . . 
H1212 H -0.4481 0.8894 0.4452 0.0440 1.0000 Uiso R . . . . . 
H1213 H -0.4982 0.8102 0.4317 0.0442 1.0000 Uiso R . . . . . 
H1221 H -0.3024 0.7952 0.4352 0.0195 1.0000 Uiso R . . . . . 
H1231 H -0.1843 0.8407 0.4721 0.0273 1.0000 Uiso R . . . . . 
H1241 H -0.0436 0.9126 0.4327 0.0387 1.0000 Uiso R . . . . . 
H1242 H -0.1484 0.9172 0.4242 0.0390 1.0000 Uiso R . . . . . 
H1243 H -0.1094 0.9677 0.4542 0.0391 1.0000 Uiso R . . . . . 
H1251 H -0.0692 0.8924 0.5053 0.0529 1.0000 Uiso R . . . . . 
H1252 H -0.0703 0.7952 0.5081 0.0530 1.0000 Uiso R . . . . . 
H1253 H 0.0064 0.8398 0.4869 0.0524 1.0000 Uiso R . . . . . 
H1261 H -0.2446 0.6791 0.4585 0.0266 1.0000 Uiso R . . . . . 
H1271 H -0.2134 0.5375 0.4518 0.0439 1.0000 Uiso R . . . . . 
H1272 H -0.1812 0.5816 0.4203 0.0438 1.0000 Uiso R . . . . . 
H1273 H -0.1080 0.5533 0.4464 0.0442 1.0000 Uiso R . . . . . 
H1281 H -0.0941 0.6386 0.5008 0.0638 1.0000 Uiso R . . . . . 
H1282 H -0.1932 0.6029 0.5060 0.0636 1.0000 Uiso R . . . . . 
H1283 H -0.1769 0.6996 0.5098 0.0633 1.0000 Uiso R . . . . . 
H1301 H -0.0672 0.4590 0.3185 0.0198 1.0000 Uiso R . . . . . 
H1321 H -0.1075 0.2781 0.3178 0.0417 1.0000 Uiso R . . . . . 
H1322 H -0.0258 0.3147 0.2969 0.0424 1.0000 Uiso R . . . . . 
H1323 H -0.0075 0.2424 0.3221 0.0425 1.0000 Uiso R . . . . . 
H1331 H 0.0290 0.2787 0.3781 0.0228 1.0000 Uiso R . . . . . 
H1351 H 0.0362 0.3243 0.4413 0.0456 1.0000 Uiso R . . . . . 
H1352 H 0.0803 0.4137 0.4457 0.0455 1.0000 Uiso R . . . . . 
H1353 H 0.1320 0.3426 0.4268 0.0457 1.0000 Uiso R . . . . . 
H1361 H 0.0183 0.5163 0.4091 0.0187 1.0000 Uiso R . . . . . 
H1371 H -0.2034 0.5232 0.3111 0.0217 1.0000 Uiso R . . . . . 
H1381 H -0.2768 0.6209 0.3627 0.0351 1.0000 Uiso R . . . . . 
H1382 H -0.2301 0.5309 0.3665 0.0356 1.0000 Uiso R . . . . . 
H1383 H -0.3267 0.5406 0.3487 0.0358 1.0000 Uiso R . . . . . 
H1391 H -0.3370 0.5993 0.2930 0.0472 1.0000 Uiso R . . . . . 
H1392 H -0.2892 0.6807 0.3026 0.0471 1.0000 Uiso R . . . . . 
H1393 H -0.2491 0.6280 0.2748 0.0470 1.0000 Uiso R . . . . . 
H1401 H -0.0671 0.5719 0.2758 0.0252 1.0000 Uiso R . . . . . 
H1411 H 0.0946 0.5994 0.2730 0.0425 1.0000 Uiso R . . . . . 
H1412 H 0.0876 0.6478 0.3063 0.0426 1.0000 Uiso R . . . . . 
H1413 H 0.0689 0.5501 0.3050 0.0428 1.0000 Uiso R . . . . . 
H1421 H -0.1202 0.7065 0.2610 0.0517 1.0000 Uiso R . . . . . 
H1422 H -0.0237 0.6879 0.2453 0.0521 1.0000 Uiso R . . . . . 
H1423 H -0.0291 0.7478 0.2754 0.0518 1.0000 Uiso R . . . . . 
loop_
_atom_site_aniso_label
_atom_site_aniso_U_11
_atom_site_aniso_U_22
_atom_site_aniso_U_33
_atom_site_aniso_U_23
_atom_site_aniso_U_13
_atom_site_aniso_U_12
Co1 0.0115(2) 0.0159(3) 0.0121(2) -0.00080(18) -0.0002(2) -0.00163(19) 
Co101 0.0122(2) 0.0171(3) 0.0129(2) 0.00238(18) -0.0008(2) 0.00278(19) 
Ti1 0.0105(3) 0.0122(3) 0.0101(3) 0.0014(2) 0.0008(3) 0.0001(2) 
Ti101 0.0105(3) 0.0114(3) 0.0115(3) 0.0009(2) 0.0005(3) 0.0002(2) 
I1 0.02604(14) 0.03653(15) 0.02406(14) -0.01018(11) -0.00587(14) -0.00533(12) 
I101 0.03033(15) 0.04008(16) 0.02368(14) 0.01207(11) -0.00564(15) 0.00858(12) 
P1 0.0119(5) 0.0171(5) 0.0114(4) 0.0013(3) 0.0014(4) -0.0014(4) 
P2 0.0103(4) 0.0137(4) 0.0139(4) 0.0012(3) -0.0008(4) 0.0000(4) 
P3 0.0158(5) 0.0120(4) 0.0118(4) 0.0013(3) 0.0005(4) 0.0007(4) 
P101 0.0103(4) 0.0151(4) 0.0158(4) 0.0007(3) -0.0018(4) -0.0002(4) 
P102 0.0141(5) 0.0185(5) 0.0111(4) 0.0010(3) 0.0000(4) 0.0023(4) 
P103 0.0142(5) 0.0129(5) 0.0140(4) 0.0002(3) -0.0011(4) -0.0015(4) 
N1 0.0128(15) 0.0120(15) 0.0149(15) 0.0008(11) 0.0002(12) -0.0002(11) 
N2 0.0133(16) 0.0164(16) 0.0132(15) -0.0013(11) 0.0001(13) 0.0034(12) 
N3 0.0131(15) 0.0156(16) 0.0100(14) 0.0015(11) 0.0003(13) 0.0002(12) 
N101 0.0133(16) 0.0184(16) 0.0120(15) 0.0022(11) -0.0018(13) -0.0035(12) 
N102 0.0122(15) 0.0141(15) 0.0113(15) -0.0007(11) -0.0021(12) 0.0035(11) 
N103 0.0117(16) 0.0098(15) 0.0185(16) 0.0001(11) 0.0014(13) 0.0007(12) 
C1 0.0143(18) 0.0088(17) 0.0197(19) 0.0036(13) -0.0047(16) 0.0005(13) 
C2 0.0139(19) 0.017(2) 0.022(2) 0.0037(15) 0.0012(16) 0.0006(15) 
C3 0.0111(18) 0.0128(17) 0.028(2) 0.0068(14) -0.0021(16) 0.0000(14) 
C4 0.0143(19) 0.024(2) 0.045(3) 0.0030(18) 0.003(2) -0.0014(16) 
C5 0.018(2) 0.0108(19) 0.034(2) 0.0036(15) -0.0057(18) -0.0009(14) 
C6 0.024(2) 0.015(2) 0.023(2) 0.0009(15) -0.0112(17) -0.0003(16) 
C7 0.037(3) 0.028(2) 0.026(2) -0.0045(17) -0.010(2) -0.0062(19) 
C8 0.0165(19) 0.0123(18) 0.0179(19) 0.0028(14) -0.0017(15) -0.0025(14) 
C9 0.0165(19) 0.024(2) 0.019(2) -0.0091(15) 0.0059(16) -0.0016(15) 
C10 0.037(3) 0.023(2) 0.036(3) -0.0050(18) 0.015(2) 0.0058(19) 
C11 0.044(3) 0.051(3) 0.024(2) -0.010(2) 0.008(2) 0.002(2) 
C12 0.0164(18) 0.024(2) 0.0200(19) 0.0109(14) 0.0013(18) -0.0018(17) 
C13 0.024(2) 0.019(2) 0.033(2) 0.0097(16) -0.0050(19) -0.0023(16) 
C14 0.037(3) 0.045(3) 0.020(2) 0.0113(19) -0.001(2) 0.003(2) 
C15 0.019(2) 0.0175(19) 0.0126(18) -0.0020(13) -0.0036(15) 0.0098(15) 
C16 0.022(2) 0.025(2) 0.022(2) -0.0039(16) -0.0023(17) 0.0082(16) 
C17 0.036(3) 0.025(2) 0.031(2) -0.0095(18) -0.008(2) 0.0120(19) 
C18 0.044(3) 0.038(3) 0.065(4) -0.024(2) -0.019(3) 0.004(2) 
C19 0.050(3) 0.031(3) 0.020(2) -0.0082(17) -0.008(2) 0.017(2) 
C20 0.030(2) 0.034(2) 0.020(2) 0.0005(16) 0.002(2) 0.021(2) 
C21 0.055(4) 0.062(4) 0.018(2) 0.006(2) 0.014(2) 0.030(3) 
C22 0.022(2) 0.027(2) 0.0179(19) 0.0033(15) 0.0011(18) 0.0088(17) 
C23 0.0172(19) 0.0112(18) 0.025(2) 0.0029(14) -0.0039(16) -0.0036(14) 
C24 0.023(2) 0.023(2) 0.028(2) -0.0052(17) -0.0067(19) 0.0072(17) 
C25 0.026(2) 0.026(2) 0.026(2) 0.0082(17) -0.0038(19) 0.0002(17) 
C26 0.0138(18) 0.019(2) 0.027(2) 0.0012(16) 0.0005(17) -0.0065(15) 
C27 0.023(2) 0.018(2) 0.035(3) 0.0055(17) 0.0042(19) -0.0059(16) 
C28 0.016(2) 0.030(2) 0.030(2) 0.0014(17) 0.0012(18) -0.0032(17) 
C29 0.0087(17) 0.0141(19) 0.0191(19) 0.0003(13) 0.0055(15) -0.0023(14) 
C30 0.0121(18) 0.019(2) 0.0190(19) 0.0026(14) 0.0023(16) -0.0026(15) 
C31 0.018(2) 0.012(2) 0.025(2) 0.0043(14) 0.0042(17) -0.0003(15) 
C32 0.033(2) 0.023(2) 0.036(3) 0.0091(18) -0.004(2) -0.0044(19) 
C33 0.0167(19) 0.012(2) 0.031(2) -0.0018(15) 0.0075(17) -0.0007(14) 
C34 0.0139(19) 0.016(2) 0.021(2) -0.0050(14) 0.0069(16) -0.0042(15) 
C35 0.031(2) 0.027(2) 0.024(2) -0.0077(17) 0.0012(19) -0.0068(17) 
C36 0.0131(18) 0.0148(19) 0.0169(19) 0.0030(14) 0.0044(15) 0.0001(14) 
C37 0.029(2) 0.024(2) 0.0113(18) 0.0034(14) 0.0061(18) 0.0118(17) 
C38 0.028(2) 0.029(2) 0.026(2) 0.0080(17) 0.0136(19) 0.0091(18) 
C39 0.051(3) 0.030(2) 0.016(2) -0.0026(16) -0.001(2) 0.019(2) 
C40 0.020(2) 0.016(2) 0.023(2) 0.0066(15) -0.0017(17) 0.0044(15) 
C41 0.016(2) 0.025(2) 0.035(2) 0.0034(18) 0.0020(19) 0.0034(16) 
C42 0.020(2) 0.034(3) 0.035(3) 0.0016(19) -0.012(2) 0.0001(18) 
C101 0.022(2) 0.017(2) 0.018(2) 0.0005(14) -0.0044(16) -0.0055(15) 
C102 0.023(2) 0.026(2) 0.0181(19) -0.0013(15) 0.0034(17) -0.0130(17) 
C103 0.040(3) 0.029(2) 0.020(2) 0.0001(16) 0.001(2) -0.023(2) 
C104 0.048(3) 0.070(4) 0.027(3) 0.004(2) 0.010(2) -0.033(3) 
C105 0.056(3) 0.027(2) 0.017(2) 0.0104(17) -0.011(2) -0.029(2) 
C106 0.040(3) 0.023(2) 0.032(2) 0.0103(18) -0.018(2) -0.013(2) 
C107 0.062(4) 0.042(3) 0.057(4) 0.027(3) -0.024(3) 0.000(3) 
C108 0.025(2) 0.021(2) 0.026(2) 0.0025(16) -0.0056(18) -0.0060(16) 
C109 0.0107(18) 0.024(2) 0.024(2) -0.0004(16) 0.0046(16) 0.0001(15) 
C110 0.017(2) 0.023(2) 0.040(3) -0.0077(18) 0.0037(19) 0.0001(17) 
C111 0.015(2) 0.023(2) 0.033(2) 0.0022(17) -0.0038(18) 0.0083(16) 
C112 0.0120(18) 0.016(2) 0.022(2) -0.0038(14) -0.0058(15) 0.0009(14) 
C113 0.020(2) 0.015(2) 0.032(2) 0.0002(16) 0.0001(18) -0.0038(15) 
C114 0.022(2) 0.031(2) 0.021(2) -0.0048(17) -0.0101(18) -0.0009(17) 
C115 0.0106(17) 0.0091(17) 0.0201(19) -0.0020(13) -0.0011(15) 0.0005(13) 
C116 0.019(2) 0.0106(18) 0.022(2) -0.0037(14) -0.0037(16) 0.0013(14) 
C117 0.025(2) 0.012(2) 0.025(2) -0.0035(15) -0.0084(18) 0.0008(16) 
C118 0.037(3) 0.024(2) 0.032(3) 0.0020(18) -0.014(2) 0.0096(19) 
C119 0.016(2) 0.0148(19) 0.037(2) 0.0003(16) -0.0146(18) 0.0039(14) 
C120 0.0168(19) 0.0095(17) 0.036(2) -0.0037(14) -0.0017(19) -0.0027(15) 
C121 0.016(2) 0.028(2) 0.045(3) -0.0089(19) 0.000(2) 0.0048(17) 
C122 0.0167(19) 0.0154(19) 0.0163(19) -0.0028(14) 0.0002(15) -0.0011(14) 
C123 0.0168(19) 0.029(2) 0.022(2) -0.0090(15) 0.0014(18) 0.0026(17) 
C124 0.022(2) 0.023(2) 0.033(2) -0.0048(17) -0.007(2) 0.0017(17) 
C125 0.041(3) 0.047(3) 0.017(2) -0.0087(19) -0.008(2) -0.001(2) 
C126 0.016(2) 0.023(2) 0.027(2) 0.0061(16) 0.0065(17) 0.0029(16) 
C127 0.036(3) 0.021(2) 0.031(2) 0.0051(17) 0.003(2) -0.0035(18) 
C128 0.059(4) 0.051(3) 0.018(2) 0.011(2) 0.015(2) -0.005(3) 
C129 0.0097(17) 0.0147(19) 0.022(2) 0.0000(14) 0.0058(16) 0.0022(13) 
C130 0.0166(19) 0.0120(19) 0.022(2) 0.0012(14) -0.0022(17) -0.0002(15) 
C131 0.014(2) 0.019(2) 0.025(2) -0.0016(15) 0.0025(17) 0.0000(15) 
C132 0.035(2) 0.013(2) 0.035(2) -0.0051(16) -0.002(2) 0.0025(18) 
C133 0.0168(19) 0.015(2) 0.027(2) 0.0046(15) 0.0064(16) 0.0076(15) 
C134 0.0130(18) 0.023(2) 0.021(2) 0.0048(15) 0.0067(17) 0.0015(15) 
C135 0.041(3) 0.023(2) 0.026(2) 0.0030(17) -0.002(2) 0.0097(19) 
C136 0.0134(19) 0.019(2) 0.0156(19) -0.0050(14) 0.0016(15) 0.0014(14) 
C137 0.0112(18) 0.0159(19) 0.028(2) -0.0048(15) -0.0037(16) -0.0013(14) 
C138 0.017(2) 0.022(2) 0.033(2) -0.0033(17) 0.0033(19) -0.0049(16) 
C139 0.026(2) 0.033(3) 0.035(3) 0.0003(19) -0.012(2) -0.0013(19) 
C140 0.031(2) 0.021(2) 0.0141(19) -0.0062(14) 0.0036(18) -0.0107(17) 
C141 0.027(2) 0.029(2) 0.029(2) -0.0083(18) 0.016(2) -0.0059(18) 
C142 0.054(3) 0.035(3) 0.015(2) 0.0043(17) -0.006(2) -0.018(2) 

_refine_ls_extinction_method 
    'None'
_oxford_refine_ls_scale 0.046739(3) 
loop_
 _geom_bond_atom_site_label_1
 _geom_bond_site_symmetry_1
 _geom_bond_atom_site_label_2
 _geom_bond_site_symmetry_2
 _geom_bond_distance
 _geom_bond_publ_flag
Co1 . Ti1 . 2.2735(8)    yes
Co1 . I1 . 2.5227(5)    yes
Co1 . P1 . 2.2474(11)    yes
Co1 . P2 . 2.2552(10)    yes
Co101 . Ti101 . 2.2734(8)    yes
Co101 . I101 . 2.5227(5)    yes
Co101 . P101 . 2.2512(10)    yes
Co101 . P102 . 2.2483(11)    yes
Ti1 . P1 . 2.6471(11)    yes
Ti1 . P2 . 2.6688(12)    yes
Ti1 . P3 . 2.6096(11)    yes
Ti1 . N1 . 1.996(3)    yes
Ti1 . N2 . 1.972(3)    yes
Ti1 . N3 . 1.991(3)    yes
Ti101 . P101 . 2.6602(12)    yes
Ti101 . P102 . 2.6457(11)    yes
Ti101 . P103 . 2.6123(11)    yes
Ti101 . N101 . 1.968(3)    yes
Ti101 . N102 . 1.995(3)    yes
Ti101 . N103 . 1.986(3)    yes
P1 . N1 . 1.671(3)    yes
P1 . C9 . 1.845(4)    yes
P1 . C12 . 1.850(3)    yes
P2 . N2 . 1.668(3)    yes
P2 . C23 . 1.859(4)    yes
P2 . C26 . 1.857(4)    yes
P3 . N3 . 1.681(3)    yes
P3 . C37 . 1.862(4)    yes
P3 . C40 . 1.855(4)    yes
P101 . N101 . 1.665(3)    yes
P101 . C109 . 1.848(4)    yes
P101 . C112 . 1.852(4)    yes
P102 . N102 . 1.681(3)    yes
P102 . C123 . 1.848(4)    yes
P102 . C126 . 1.858(4)    yes
P103 . N103 . 1.684(3)    yes
P103 . C137 . 1.868(4)    yes
P103 . C140 . 1.861(4)    yes
N1 . C1 . 1.422(4)    yes
N2 . C15 . 1.413(4)    yes
N3 . C29 . 1.402(5)    yes
N101 . C101 . 1.407(5)    yes
N102 . C115 . 1.414(4)    yes
N103 . C129 . 1.419(4)    yes
C1 . C2 . 1.387(5)    yes
C1 . C8 . 1.406(5)    yes
C2 . C3 . 1.396(5)    yes
C2 . H21 . 0.914    no
C3 . C4 . 1.496(5)    yes
C3 . C5 . 1.387(6)    yes
C4 . H41 . 0.943    no
C4 . H42 . 0.934    no
C4 . H43 . 0.945    no
C5 . C6 . 1.386(6)    yes
C5 . H51 . 0.926    no
C6 . C7 . 1.507(6)    yes
C6 . C8 . 1.391(5)    yes
C7 . H71 . 0.946    no
C7 . H72 . 0.976    no
C7 . H73 . 0.946    no
C8 . H81 . 0.934    no
C9 . C10 . 1.516(6)    yes
C9 . C11 . 1.535(6)    yes
C9 . H91 . 0.982    no
C10 . H101 . 0.970    no
C10 . H102 . 0.964    no
C10 . H103 . 0.960    no
C11 . H111 . 0.954    no
C11 . H112 . 0.980    no
C11 . H113 . 0.964    no
C12 . C13 . 1.519(5)    yes
C12 . C14 . 1.543(6)    yes
C12 . H121 . 0.979    no
C13 . H131 . 0.950    no
C13 . H132 . 0.968    no
C13 . H133 . 0.964    no
C14 . H141 . 0.965    no
C14 . H142 . 0.969    no
C14 . H143 . 0.956    no
C15 . C16 . 1.390(6)    yes
C15 . C22 . 1.397(5)    yes
C16 . C17 . 1.384(6)    yes
C16 . H161 . 0.947    no
C17 . C18 . 1.512(7)    yes
C17 . C19 . 1.386(7)    yes
C18 . H181 . 0.952    no
C18 . H182 . 0.953    no
C18 . H183 . 0.944    no
C19 . C20 . 1.375(7)    yes
C19 . H191 . 0.930    no
C20 . C21 . 1.512(6)    yes
C20 . C22 . 1.394(5)    yes
C21 . H211 . 0.948    no
C21 . H212 . 0.956    no
C21 . H213 . 0.963    no
C22 . H221 . 0.940    no
C23 . C24 . 1.532(5)    yes
C23 . C25 . 1.519(5)    yes
C23 . H231 . 0.986    no
C24 . H241 . 0.963    no
C24 . H242 . 0.961    no
C24 . H243 . 0.958    no
C25 . H251 . 0.960    no
C25 . H252 . 0.941    no
C25 . H253 . 0.948    no
C26 . C27 . 1.523(5)    yes
C26 . C28 . 1.521(6)    yes
C26 . H261 . 0.982    no
C27 . H271 . 0.942    no
C27 . H272 . 0.960    no
C27 . H273 . 0.958    no
C28 . H281 . 0.955    no
C28 . H282 . 0.958    no
C28 . H283 . 0.965    no
C29 . C30 . 1.408(5)    yes
C29 . C36 . 1.394(5)    yes
C30 . C31 . 1.381(5)    yes
C30 . H301 . 0.945    no
C31 . C32 . 1.509(5)    yes
C31 . C33 . 1.399(6)    yes
C32 . H321 . 0.961    no
C32 . H322 . 0.975    no
C32 . H323 . 0.970    no
C33 . C34 . 1.390(5)    yes
C33 . H331 . 0.915    no
C34 . C35 . 1.500(5)    yes
C34 . C36 . 1.398(5)    yes
C35 . H351 . 0.948    no
C35 . H352 . 0.937    no
C35 . H353 . 0.948    no
C36 . H361 . 0.902    no
C37 . C38 . 1.530(6)    yes
C37 . C39 . 1.538(6)    yes
C37 . H371 . 0.973    no
C38 . H381 . 0.950    no
C38 . H382 . 0.954    no
C38 . H383 . 0.953    no
C39 . H391 . 0.947    no
C39 . H392 . 0.942    no
C39 . H393 . 0.955    no
C40 . C41 . 1.509(6)    yes
C40 . C42 . 1.530(6)    yes
C40 . H401 . 0.965    no
C41 . H411 . 0.961    no
C41 . H412 . 0.976    no
C41 . H413 . 0.965    no
C42 . H421 . 0.956    no
C42 . H422 . 0.947    no
C42 . H423 . 0.948    no
C101 . C102 . 1.400(5)    yes
C101 . C108 . 1.393(6)    yes
C102 . C103 . 1.406(5)    yes
C102 . H1021 . 0.930    no
C103 . C104 . 1.502(7)    yes
C103 . C105 . 1.383(7)    yes
C104 . H1041 . 0.961    no
C104 . H1042 . 0.952    no
C104 . H1043 . 0.956    no
C105 . C106 . 1.398(7)    yes
C105 . H1051 . 0.930    no
C106 . C107 . 1.511(7)    yes
C106 . C108 . 1.390(6)    yes
C107 . H1071 . 0.939    no
C107 . H1072 . 0.950    no
C107 . H1073 . 0.952    no
C108 . H1081 . 0.960    no
C109 . C110 . 1.518(5)    yes
C109 . C111 . 1.525(6)    yes
C109 . H1091 . 0.967    no
C110 . H1101 . 0.944    no
C110 . H1102 . 0.943    no
C110 . H1103 . 0.959    no
C111 . H1111 . 0.961    no
C111 . H1112 . 0.950    no
C111 . H1113 . 0.972    no
C112 . C113 . 1.536(5)    yes
C112 . C114 . 1.529(5)    yes
C112 . H1121 . 0.978    no
C113 . H1131 . 0.947    no
C113 . H1132 . 0.968    no
C113 . H1133 . 0.940    no
C114 . H1141 . 0.938    no
C114 . H1142 . 0.959    no
C114 . H1143 . 0.953    no
C115 . C116 . 1.388(5)    yes
C115 . C122 . 1.408(5)    yes
C116 . C117 . 1.391(5)    yes
C116 . H1161 . 0.943    no
C117 . C118 . 1.499(6)    yes
C117 . C119 . 1.396(6)    yes
C118 . H1181 . 0.940    no
C118 . H1182 . 0.944    no
C118 . H1183 . 0.957    no
C119 . C120 . 1.387(6)    yes
C119 . H1191 . 0.940    no
C120 . C121 . 1.513(6)    yes
C120 . C122 . 1.387(5)    yes
C121 . H1211 . 0.951    no
C121 . H1212 . 0.951    no
C121 . H1213 . 0.955    no
C122 . H1221 . 0.917    no
C123 . C124 . 1.531(6)    yes
C123 . C125 . 1.510(6)    yes
C123 . H1231 . 0.962    no
C124 . H1241 . 0.956    no
C124 . H1242 . 0.948    no
C124 . H1243 . 0.961    no
C125 . H1251 . 0.939    no
C125 . H1252 . 0.959    no
C125 . H1253 . 0.967    no
C126 . C127 . 1.527(6)    yes
C126 . C128 . 1.525(6)    yes
C126 . H1261 . 0.966    no
C127 . H1271 . 0.937    no
C127 . H1272 . 0.951    no
C127 . H1273 . 0.949    no
C128 . H1281 . 0.954    no
C128 . H1282 . 0.963    no
C128 . H1283 . 0.965    no
C129 . C130 . 1.387(5)    yes
C129 . C136 . 1.397(5)    yes
C130 . C131 . 1.402(5)    yes
C130 . H1301 . 0.922    no
C131 . C132 . 1.511(5)    yes
C131 . C133 . 1.372(5)    yes
C132 . H1321 . 0.958    no
C132 . H1322 . 0.956    no
C132 . H1323 . 0.950    no
C133 . C134 . 1.391(6)    yes
C133 . H1331 . 0.920    no
C134 . C135 . 1.508(6)    yes
C134 . C136 . 1.376(5)    yes
C135 . H1351 . 0.947    no
C135 . H1352 . 0.950    no
C135 . H1353 . 0.935    no
C136 . H1361 . 0.905    no
C137 . C138 . 1.516(5)    yes
C137 . C139 . 1.520(6)    yes
C137 . H1371 . 0.975    no
C138 . H1381 . 0.957    no
C138 . H1382 . 0.956    no
C138 . H1383 . 0.960    no
C139 . H1391 . 0.948    no
C139 . H1392 . 0.921    no
C139 . H1393 . 0.942    no
C140 . C141 . 1.529(6)    yes
C140 . C142 . 1.524(6)    yes
C140 . H1401 . 0.972    no
C141 . H1411 . 0.954    no
C141 . H1412 . 0.955    no
C141 . H1413 . 0.969    no
C142 . H1421 . 0.963    no
C142 . H1422 . 0.949    no
C142 . H1423 . 0.956    no
loop_
 _geom_angle_atom_site_label_1
 _geom_angle_site_symmetry_1
 _geom_angle_atom_site_label_2
 _geom_angle_site_symmetry_2
 _geom_angle_atom_site_label_3
 _geom_angle_site_symmetry_3
 _geom_angle
 _geom_angle_publ_flag
Ti1 . Co1 . I1 . 148.56(3)    yes
Ti1 . Co1 . P1 . 71.68(3)    yes
I1 . Co1 . P1 . 118.18(3)    yes
Ti1 . Co1 . P2 . 72.22(3)    yes
I1 . Co1 . P2 . 119.72(3)    yes
P1 . Co1 . P2 . 116.93(4)    yes
Ti101 . Co101 . I101 . 149.12(3)    yes
Ti101 . Co101 . P101 . 72.02(3)    yes
I101 . Co101 . P101 . 120.09(3)    yes
Ti101 . Co101 . P102 . 71.62(3)    yes
I101 . Co101 . P102 . 117.72(3)    yes
P101 . Co101 . P102 . 116.87(4)    yes
Co1 . Ti1 . P1 . 53.70(3)    yes
Co1 . Ti1 . P2 . 53.57(3)    yes
P1 . Ti1 . P2 . 92.43(3)    yes
Co1 . Ti1 . P3 . 155.34(4)    yes
P1 . Ti1 . P3 . 134.87(4)    yes
P2 . Ti1 . P3 . 132.02(4)    yes
Co1 . Ti1 . N1 . 92.45(9)    yes
P1 . Ti1 . N1 . 39.11(9)    yes
P2 . Ti1 . N1 . 116.61(9)    yes
P3 . Ti1 . N1 . 101.74(9)    yes
Co1 . Ti1 . N2 . 92.03(9)    yes
P1 . Ti1 . N2 . 118.17(9)    yes
P2 . Ti1 . N2 . 38.58(9)    yes
P3 . Ti1 . N2 . 98.69(9)    yes
N1 . Ti1 . N2 . 118.23(12)    yes
Co1 . Ti1 . N3 . 115.24(9)    yes
P1 . Ti1 . N3 . 127.31(9)    yes
P2 . Ti1 . N3 . 122.98(9)    yes
P3 . Ti1 . N3 . 40.10(9)    yes
N1 . Ti1 . N3 . 119.76(12)    yes
N2 . Ti1 . N3 . 113.20(12)    yes
Co101 . Ti101 . P101 . 53.60(3)    yes
Co101 . Ti101 . P102 . 53.75(3)    yes
P101 . Ti101 . P102 . 92.53(4)    yes
Co101 . Ti101 . P103 . 155.41(4)    yes
P101 . Ti101 . P103 . 132.30(4)    yes
P102 . Ti101 . P103 . 134.47(4)    yes
Co101 . Ti101 . N101 . 92.18(9)    yes
P101 . Ti101 . N101 . 38.65(9)    yes
P102 . Ti101 . N101 . 118.99(9)    yes
P103 . Ti101 . N101 . 98.49(9)    yes
Co101 . Ti101 . N102 . 92.66(9)    yes
P101 . Ti101 . N102 . 115.98(9)    yes
P102 . Ti101 . N102 . 39.42(8)    yes
P103 . Ti101 . N102 . 101.60(9)    yes
N101 . Ti101 . N102 . 118.03(12)    yes
Co101 . Ti101 . N103 . 115.27(9)    yes
P101 . Ti101 . N103 . 124.15(10)    yes
P102 . Ti101 . N103 . 126.08(9)    yes
P103 . Ti101 . N103 . 40.14(9)    yes
N101 . Ti101 . N103 . 113.67(13)    yes
N102 . Ti101 . N103 . 119.26(13)    yes
Ti1 . P1 . Co1 . 54.62(3)    yes
Ti1 . P1 . N1 . 48.89(10)    yes
Co1 . P1 . N1 . 103.06(11)    yes
Ti1 . P1 . C9 . 118.07(13)    yes
Co1 . P1 . C9 . 113.16(13)    yes
N1 . P1 . C9 . 107.58(17)    yes
Ti1 . P1 . C12 . 133.99(13)    yes
Co1 . P1 . C12 . 116.76(14)    yes
N1 . P1 . C12 . 109.14(16)    yes
C9 . P1 . C12 . 106.74(18)    yes
Ti1 . P2 . Co1 . 54.21(3)    yes
Ti1 . P2 . N2 . 47.49(10)    yes
Co1 . P2 . N2 . 101.54(11)    yes
Ti1 . P2 . C23 . 130.95(13)    yes
Co1 . P2 . C23 . 120.48(13)    yes
N2 . P2 . C23 . 106.26(16)    yes
Ti1 . P2 . C26 . 120.69(13)    yes
Co1 . P2 . C26 . 112.05(13)    yes
N2 . P2 . C26 . 109.51(17)    yes
C23 . P2 . C26 . 106.44(18)    yes
Ti1 . P3 . N3 . 49.74(10)    yes
Ti1 . P3 . C37 . 127.17(14)    yes
N3 . P3 . C37 . 111.23(17)    yes
Ti1 . P3 . C40 . 129.26(13)    yes
N3 . P3 . C40 . 108.38(16)    yes
C37 . P3 . C40 . 102.81(18)    yes
Ti101 . P101 . Co101 . 54.38(3)    yes
Ti101 . P101 . N101 . 47.58(10)    yes
Co101 . P101 . N101 . 101.87(11)    yes
Ti101 . P101 . C109 . 121.71(13)    yes
Co101 . P101 . C109 . 112.00(13)    yes
N101 . P101 . C109 . 109.65(17)    yes
Ti101 . P101 . C112 . 130.02(12)    yes
Co101 . P101 . C112 . 120.85(13)    yes
N101 . P101 . C112 . 105.67(16)    yes
C109 . P101 . C112 . 106.24(17)    yes
Ti101 . P102 . Co101 . 54.63(3)    yes
Ti101 . P102 . N102 . 48.93(10)    yes
Co101 . P102 . N102 . 102.93(11)    yes
Ti101 . P102 . C123 . 135.73(13)    yes
Co101 . P102 . C123 . 116.18(14)    yes
N102 . P102 . C123 . 110.39(16)    yes
Ti101 . P102 . C126 . 117.34(14)    yes
Co101 . P102 . C126 . 113.46(13)    yes
N102 . P102 . C126 . 107.70(17)    yes
C123 . P102 . C126 . 105.95(19)    yes
Ti101 . P103 . N103 . 49.48(10)    yes
Ti101 . P103 . C137 . 129.74(13)    yes
N103 . P103 . C137 . 108.52(16)    yes
Ti101 . P103 . C140 . 126.39(14)    yes
N103 . P103 . C140 . 111.53(18)    yes
C137 . P103 . C140 . 103.15(18)    yes
P1 . N1 . Ti1 . 91.99(14)    yes
P1 . N1 . C1 . 128.8(2)    yes
Ti1 . N1 . C1 . 139.2(2)    yes
P2 . N2 . Ti1 . 93.93(14)    yes
P2 . N2 . C15 . 130.2(2)    yes
Ti1 . N2 . C15 . 135.0(2)    yes
P3 . N3 . Ti1 . 90.16(13)    yes
P3 . N3 . C29 . 128.3(2)    yes
Ti1 . N3 . C29 . 141.3(2)    yes
P101 . N101 . Ti101 . 93.77(14)    yes
P101 . N101 . C101 . 130.2(3)    yes
Ti101 . N101 . C101 . 135.0(3)    yes
P102 . N102 . Ti101 . 91.65(13)    yes
P102 . N102 . C115 . 128.9(2)    yes
Ti101 . N102 . C115 . 139.5(2)    yes
P103 . N103 . Ti101 . 90.38(13)    yes
P103 . N103 . C129 . 127.9(3)    yes
Ti101 . N103 . C129 . 141.7(3)    yes
N1 . C1 . C2 . 124.0(3)    yes
N1 . C1 . C8 . 117.9(3)    yes
C2 . C1 . C8 . 118.0(3)    yes
C1 . C2 . C3 . 121.7(4)    yes
C1 . C2 . H21 . 118.7    no
C3 . C2 . H21 . 119.6    no
C2 . C3 . C4 . 119.6(4)    yes
C2 . C3 . C5 . 119.0(4)    yes
C4 . C3 . C5 . 121.4(4)    yes
C3 . C4 . H41 . 110.3    no
C3 . C4 . H42 . 112.6    no
H41 . C4 . H42 . 107.7    no
C3 . C4 . H43 . 109.3    no
H41 . C4 . H43 . 109.3    no
H42 . C4 . H43 . 107.5    no
C3 . C5 . C6 . 120.7(4)    yes
C3 . C5 . H51 . 121.0    no
C6 . C5 . H51 . 118.3    no
C5 . C6 . C7 . 120.7(4)    yes
C5 . C6 . C8 . 119.6(4)    yes
C7 . C6 . C8 . 119.6(4)    yes
C6 . C7 . H71 . 109.5    no
C6 . C7 . H72 . 111.0    no
H71 . C7 . H72 . 107.5    no
C6 . C7 . H73 . 111.4    no
H71 . C7 . H73 . 108.2    no
H72 . C7 . H73 . 109.2    no
C1 . C8 . C6 . 120.9(4)    yes
C1 . C8 . H81 . 119.5    no
C6 . C8 . H81 . 119.6    no
P1 . C9 . C10 . 110.8(3)    yes
P1 . C9 . C11 . 112.9(3)    yes
C10 . C9 . C11 . 109.4(4)    yes
P1 . C9 . H91 . 106.6    no
C10 . C9 . H91 . 109.3    no
C11 . C9 . H91 . 107.8    no
C9 . C10 . H101 . 110.6    no
C9 . C10 . H102 . 110.4    no
H101 . C10 . H102 . 110.0    no
C9 . C10 . H103 . 109.2    no
H101 . C10 . H103 . 107.7    no
H102 . C10 . H103 . 108.9    no
C9 . C11 . H111 . 110.4    no
C9 . C11 . H112 . 109.2    no
H111 . C11 . H112 . 107.2    no
C9 . C11 . H113 . 110.9    no
H111 . C11 . H113 . 109.9    no
H112 . C11 . H113 . 109.1    no
P1 . C12 . C13 . 110.1(3)    yes
P1 . C12 . C14 . 111.5(3)    yes
C13 . C12 . C14 . 110.0(3)    yes
P1 . C12 . H121 . 107.5    no
C13 . C12 . H121 . 108.7    no
C14 . C12 . H121 . 109.1    no
C12 . C13 . H131 . 108.3    no
C12 . C13 . H132 . 109.6    no
H131 . C13 . H132 . 108.4    no
C12 . C13 . H133 . 112.9    no
H131 . C13 . H133 . 107.7    no
H132 . C13 . H133 . 109.9    no
C12 . C14 . H141 . 111.1    no
C12 . C14 . H142 . 111.3    no
H141 . C14 . H142 . 109.8    no
C12 . C14 . H143 . 109.9    no
H141 . C14 . H143 . 107.3    no
H142 . C14 . H143 . 107.4    no
N2 . C15 . C16 . 118.5(3)    yes
N2 . C15 . C22 . 122.3(4)    yes
C16 . C15 . C22 . 119.1(4)    yes
C15 . C16 . C17 . 121.0(4)    yes
C15 . C16 . H161 . 119.4    no
C17 . C16 . H161 . 119.6    no
C16 . C17 . C18 . 120.2(4)    yes
C16 . C17 . C19 . 118.5(4)    yes
C18 . C17 . C19 . 121.2(4)    yes
C17 . C18 . H181 . 111.4    no
C17 . C18 . H182 . 109.9    no
H181 . C18 . H182 . 108.7    no
C17 . C18 . H183 . 111.3    no
H181 . C18 . H183 . 107.2    no
H182 . C18 . H183 . 108.3    no
C17 . C19 . C20 . 122.2(4)    yes
C17 . C19 . H191 . 119.8    no
C20 . C19 . H191 . 118.0    no
C19 . C20 . C21 . 121.8(4)    yes
C19 . C20 . C22 . 118.7(4)    yes
C21 . C20 . C22 . 119.6(5)    yes
C20 . C21 . H211 . 110.4    no
C20 . C21 . H212 . 108.7    no
H211 . C21 . H212 . 108.5    no
C20 . C21 . H213 . 110.6    no
H211 . C21 . H213 . 109.3    no
H212 . C21 . H213 . 109.3    no
C15 . C22 . C20 . 120.4(4)    yes
C15 . C22 . H221 . 120.7    no
C20 . C22 . H221 . 118.9    no
P2 . C23 . C24 . 113.6(3)    yes
P2 . C23 . C25 . 114.0(3)    yes
C24 . C23 . C25 . 110.3(3)    yes
P2 . C23 . H231 . 104.7    no
C24 . C23 . H231 . 106.8    no
C25 . C23 . H231 . 106.8    no
C23 . C24 . H241 . 110.2    no
C23 . C24 . H242 . 110.0    no
H241 . C24 . H242 . 108.4    no
C23 . C24 . H243 . 110.6    no
H241 . C24 . H243 . 108.9    no
H242 . C24 . H243 . 108.6    no
C23 . C25 . H251 . 107.4    no
C23 . C25 . H252 . 111.8    no
H251 . C25 . H252 . 109.1    no
C23 . C25 . H253 . 110.0    no
H251 . C25 . H253 . 108.3    no
H252 . C25 . H253 . 110.0    no
P2 . C26 . C27 . 110.5(3)    yes
P2 . C26 . C28 . 111.4(3)    yes
C27 . C26 . C28 . 110.5(3)    yes
P2 . C26 . H261 . 106.8    no
C27 . C26 . H261 . 107.8    no
C28 . C26 . H261 . 109.7    no
C26 . C27 . H271 . 111.1    no
C26 . C27 . H272 . 111.8    no
H271 . C27 . H272 . 107.5    no
C26 . C27 . H273 . 110.1    no
H271 . C27 . H273 . 107.5    no
H272 . C27 . H273 . 108.8    no
C26 . C28 . H281 . 110.5    no
C26 . C28 . H282 . 112.0    no
H281 . C28 . H282 . 107.0    no
C26 . C28 . H283 . 110.5    no
H281 . C28 . H283 . 108.4    no
H282 . C28 . H283 . 108.3    no
N3 . C29 . C30 . 123.7(3)    yes
N3 . C29 . C36 . 118.5(3)    yes
C30 . C29 . C36 . 117.8(3)    yes
C29 . C30 . C31 . 121.5(4)    yes
C29 . C30 . H301 . 117.2    no
C31 . C30 . H301 . 121.3    no
C30 . C31 . C32 . 120.4(4)    yes
C30 . C31 . C33 . 119.6(3)    yes
C32 . C31 . C33 . 120.0(3)    yes
C31 . C32 . H321 . 112.2    no
C31 . C32 . H322 . 109.3    no
H321 . C32 . H322 . 110.2    no
C31 . C32 . H323 . 110.8    no
H321 . C32 . H323 . 107.0    no
H322 . C32 . H323 . 107.1    no
C31 . C33 . C34 . 120.2(3)    yes
C31 . C33 . H331 . 120.3    no
C34 . C33 . H331 . 119.5    no
C33 . C34 . C35 . 120.3(3)    yes
C33 . C34 . C36 . 119.5(4)    yes
C35 . C34 . C36 . 120.2(4)    yes
C34 . C35 . H351 . 111.5    no
C34 . C35 . H352 . 110.3    no
H351 . C35 . H352 . 108.6    no
C34 . C35 . H353 . 107.6    no
H351 . C35 . H353 . 109.0    no
H352 . C35 . H353 . 109.7    no
C34 . C36 . C29 . 121.3(3)    yes
C34 . C36 . H361 . 120.2    no
C29 . C36 . H361 . 118.5    no
P3 . C37 . C38 . 111.5(3)    yes
P3 . C37 . C39 . 108.8(3)    yes
C38 . C37 . C39 . 110.1(3)    yes
P3 . C37 . H371 . 109.8    no
C38 . C37 . H371 . 107.3    no
C39 . C37 . H371 . 109.3    no
C37 . C38 . H381 . 109.6    no
C37 . C38 . H382 . 111.1    no
H381 . C38 . H382 . 109.0    no
C37 . C38 . H383 . 109.9    no
H381 . C38 . H383 . 107.4    no
H382 . C38 . H383 . 109.8    no
C37 . C39 . H391 . 110.8    no
C37 . C39 . H392 . 108.1    no
H391 . C39 . H392 . 109.0    no
C37 . C39 . H393 . 111.5    no
H391 . C39 . H393 . 109.0    no
H392 . C39 . H393 . 108.5    no
P3 . C40 . C41 . 110.3(3)    yes
P3 . C40 . C42 . 110.8(3)    yes
C41 . C40 . C42 . 110.9(3)    yes
P3 . C40 . H401 . 108.1    no
C41 . C40 . H401 . 107.7    no
C42 . C40 . H401 . 108.9    no
C40 . C41 . H411 . 109.9    no
C40 . C41 . H412 . 108.1    no
H411 . C41 . H412 . 109.7    no
C40 . C41 . H413 . 110.3    no
H411 . C41 . H413 . 108.5    no
H412 . C41 . H413 . 110.3    no
C40 . C42 . H421 . 111.3    no
C40 . C42 . H422 . 110.1    no
H421 . C42 . H422 . 108.5    no
C40 . C42 . H423 . 110.5    no
H421 . C42 . H423 . 109.0    no
H422 . C42 . H423 . 107.3    no
N101 . C101 . C102 . 122.1(4)    yes
N101 . C101 . C108 . 118.6(4)    yes
C102 . C101 . C108 . 119.2(4)    yes
C101 . C102 . C103 . 120.2(4)    yes
C101 . C102 . H1021 . 119.8    no
C103 . C102 . H1021 . 120.0    no
C102 . C103 . C104 . 120.1(5)    yes
C102 . C103 . C105 . 119.1(4)    yes
C104 . C103 . C105 . 120.7(4)    yes
C103 . C104 . H1041 . 110.2    no
C103 . C104 . H1042 . 111.6    no
H1041 . C104 . H1042 . 108.5    no
C103 . C104 . H1043 . 109.0    no
H1041 . C104 . H1043 . 107.8    no
H1042 . C104 . H1043 . 109.6    no
C103 . C105 . C106 . 121.5(4)    yes
C103 . C105 . H1051 . 118.7    no
C106 . C105 . H1051 . 119.8    no
C105 . C106 . C107 . 121.6(4)    yes
C105 . C106 . C108 . 118.6(4)    yes
C107 . C106 . C108 . 119.8(5)    yes
C106 . C107 . H1071 . 109.3    no
C106 . C107 . H1072 . 110.5    no
H1071 . C107 . H1072 . 108.5    no
C106 . C107 . H1073 . 110.1    no
H1071 . C107 . H1073 . 109.8    no
H1072 . C107 . H1073 . 108.7    no
C101 . C108 . C106 . 121.3(4)    yes
C101 . C108 . H1081 . 119.8    no
C106 . C108 . H1081 . 118.9    no
P101 . C109 . C110 . 110.0(3)    yes
P101 . C109 . C111 . 111.3(3)    yes
C110 . C109 . C111 . 110.4(3)    yes
P101 . C109 . H1091 . 107.5    no
C110 . C109 . H1091 . 110.2    no
C111 . C109 . H1091 . 107.4    no
C109 . C110 . H1101 . 110.3    no
C109 . C110 . H1102 . 110.1    no
H1101 . C110 . H1102 . 107.8    no
C109 . C110 . H1103 . 109.5    no
H1101 . C110 . H1103 . 108.9    no
H1102 . C110 . H1103 . 110.2    no
C109 . C111 . H1111 . 111.8    no
C109 . C111 . H1112 . 108.2    no
H1111 . C111 . H1112 . 109.6    no
C109 . C111 . H1113 . 109.9    no
H1111 . C111 . H1113 . 109.8    no
H1112 . C111 . H1113 . 107.4    no
P101 . C112 . C113 . 113.8(3)    yes
P101 . C112 . C114 . 113.1(3)    yes
C113 . C112 . C114 . 110.8(3)    yes
P101 . C112 . H1121 . 105.2    no
C113 . C112 . H1121 . 107.1    no
C114 . C112 . H1121 . 106.2    no
C112 . C113 . H1131 . 109.6    no
C112 . C113 . H1132 . 110.2    no
H1131 . C113 . H1132 . 109.2    no
C112 . C113 . H1133 . 111.3    no
H1131 . C113 . H1133 . 108.2    no
H1132 . C113 . H1133 . 108.3    no
C112 . C114 . H1141 . 111.2    no
C112 . C114 . H1142 . 108.8    no
H1141 . C114 . H1142 . 109.3    no
C112 . C114 . H1143 . 110.2    no
H1141 . C114 . H1143 . 108.4    no
H1142 . C114 . H1143 . 109.0    no
N102 . C115 . C116 . 118.5(3)    yes
N102 . C115 . C122 . 123.3(3)    yes
C116 . C115 . C122 . 118.2(3)    yes
C115 . C116 . C117 . 121.9(4)    yes
C115 . C116 . H1161 . 118.6    no
C117 . C116 . H1161 . 119.5    no
C116 . C117 . C118 . 120.1(4)    yes
C116 . C117 . C119 . 118.6(4)    yes
C118 . C117 . C119 . 121.3(4)    yes
C117 . C118 . H1181 . 112.3    no
C117 . C118 . H1182 . 112.1    no
H1181 . C118 . H1182 . 107.8    no
C117 . C118 . H1183 . 110.5    no
H1181 . C118 . H1183 . 108.0    no
H1182 . C118 . H1183 . 105.7    no
C117 . C119 . C120 . 120.7(4)    yes
C117 . C119 . H1191 . 119.6    no
C120 . C119 . H1191 . 119.7    no
C119 . C120 . C121 . 119.9(4)    yes
C119 . C120 . C122 . 119.8(4)    yes
C121 . C120 . C122 . 120.2(4)    yes
C120 . C121 . H1211 . 110.5    no
C120 . C121 . H1212 . 110.7    no
H1211 . C121 . H1212 . 109.5    no
C120 . C121 . H1213 . 109.3    no
H1211 . C121 . H1213 . 108.5    no
H1212 . C121 . H1213 . 108.3    no
C115 . C122 . C120 . 120.6(4)    yes
C115 . C122 . H1221 . 119.3    no
C120 . C122 . H1221 . 120.0    no
P102 . C123 . C124 . 110.3(3)    yes
P102 . C123 . C125 . 112.9(3)    yes
C124 . C123 . C125 . 110.2(4)    yes
P102 . C123 . H1231 . 108.0    no
C124 . C123 . H1231 . 108.6    no
C125 . C123 . H1231 . 106.6    no
C123 . C124 . H1241 . 108.8    no
C123 . C124 . H1242 . 110.8    no
H1241 . C124 . H1242 . 108.2    no
C123 . C124 . H1243 . 111.7    no
H1241 . C124 . H1243 . 108.0    no
H1242 . C124 . H1243 . 109.2    no
C123 . C125 . H1251 . 109.2    no
C123 . C125 . H1252 . 110.6    no
H1251 . C125 . H1252 . 108.7    no
C123 . C125 . H1253 . 110.1    no
H1251 . C125 . H1253 . 109.6    no
H1252 . C125 . H1253 . 108.6    no
P102 . C126 . C127 . 109.4(3)    yes
P102 . C126 . C128 . 113.5(3)    yes
C127 . C126 . C128 . 109.6(4)    yes
P102 . C126 . H1261 . 106.1    no
C127 . C126 . H1261 . 109.7    no
C128 . C126 . H1261 . 108.5    no
C126 . C127 . H1271 . 108.4    no
C126 . C127 . H1272 . 109.6    no
H1271 . C127 . H1272 . 107.7    no
C126 . C127 . H1273 . 111.2    no
H1271 . C127 . H1273 . 110.2    no
H1272 . C127 . H1273 . 109.7    no
C126 . C128 . H1281 . 111.2    no
C126 . C128 . H1282 . 109.0    no
H1281 . C128 . H1282 . 107.1    no
C126 . C128 . H1283 . 111.6    no
H1281 . C128 . H1283 . 110.1    no
H1282 . C128 . H1283 . 107.7    no
N103 . C129 . C130 . 123.3(3)    yes
N103 . C129 . C136 . 118.0(3)    yes
C130 . C129 . C136 . 118.7(3)    yes
C129 . C130 . C131 . 120.8(4)    yes
C129 . C130 . H1301 . 119.6    no
C131 . C130 . H1301 . 119.6    no
C130 . C131 . C132 . 120.1(4)    yes
C130 . C131 . C133 . 118.8(4)    yes
C132 . C131 . C133 . 121.0(4)    yes
C131 . C132 . H1321 . 110.5    no
C131 . C132 . H1322 . 109.3    no
H1321 . C132 . H1322 . 108.8    no
C131 . C132 . H1323 . 110.1    no
H1321 . C132 . H1323 . 108.7    no
H1322 . C132 . H1323 . 109.5    no
C131 . C133 . C134 . 121.6(4)    yes
C131 . C133 . H1331 . 119.3    no
C134 . C133 . H1331 . 119.1    no
C133 . C134 . C135 . 120.2(3)    yes
C133 . C134 . C136 . 118.9(4)    yes
C135 . C134 . C136 . 120.8(4)    yes
C134 . C135 . H1351 . 109.3    no
C134 . C135 . H1352 . 110.0    no
H1351 . C135 . H1352 . 110.7    no
C134 . C135 . H1353 . 108.2    no
H1351 . C135 . H1353 . 107.9    no
H1352 . C135 . H1353 . 110.6    no
C129 . C136 . C134 . 121.2(3)    yes
C129 . C136 . H1361 . 118.2    no
C134 . C136 . H1361 . 120.6    no
P103 . C137 . C138 . 109.6(3)    yes
P103 . C137 . C139 . 110.7(3)    yes
C138 . C137 . C139 . 111.4(3)    yes
P103 . C137 . H1371 . 108.3    no
C138 . C137 . H1371 . 108.0    no
C139 . C137 . H1371 . 108.8    no
C137 . C138 . H1381 . 108.5    no
C137 . C138 . H1382 . 108.6    no
H1381 . C138 . H1382 . 111.5    no
C137 . C138 . H1383 . 108.5    no
H1381 . C138 . H1383 . 109.6    no
H1382 . C138 . H1383 . 110.0    no
C137 . C139 . H1391 . 110.9    no
C137 . C139 . H1392 . 111.0    no
H1391 . C139 . H1392 . 107.9    no
C137 . C139 . H1393 . 110.1    no
H1391 . C139 . H1393 . 108.0    no
H1392 . C139 . H1393 . 108.8    no
P103 . C140 . C141 . 111.2(3)    yes
P103 . C140 . C142 . 109.5(3)    yes
C141 . C140 . C142 . 110.9(4)    yes
P103 . C140 . H1401 . 109.8    no
C141 . C140 . H1401 . 107.2    no
C142 . C140 . H1401 . 108.3    no
C140 . C141 . H1411 . 110.7    no
C140 . C141 . H1412 . 109.3    no
H1411 . C141 . H1412 . 109.3    no
C140 . C141 . H1413 . 109.7    no
H1411 . C141 . H1413 . 108.3    no
H1412 . C141 . H1413 . 109.6    no
C140 . C142 . H1421 . 110.1    no
C140 . C142 . H1422 . 107.7    no
H1421 . C142 . H1422 . 108.2    no
C140 . C142 . H1423 . 112.1    no
H1421 . C142 . H1423 . 110.1    no
H1422 . C142 . H1423 . 108.4    no


_iucr_refine_instructions_details
;
#
# Punched on 26/02/14 at 20:04:45
#
#LIST     12                                                                    
BLOCK SCALE X'S  U'S 
RIDE C   (   2,X'S) H   (  21,X'S) 
RIDE C   (   4,X'S) H   (  41,X'S) H   (  42,X'S) H   (  43,X'S) 
RIDE C   (   5,X'S) H   (  51,X'S) 
RIDE C   (   7,X'S) H   (  71,X'S) H   (  72,X'S) H   (  73,X'S) 
RIDE C   (   8,X'S) H   (  81,X'S) 
RIDE C   (   9,X'S) H   (  91,X'S) 
RIDE C   (  10,X'S) H   ( 101,X'S) H   ( 102,X'S) H   ( 103,X'S) 
RIDE C   (  11,X'S) H   ( 111,X'S) H   ( 112,X'S) H   ( 113,X'S) 
RIDE C   (  12,X'S) H   ( 121,X'S) 
RIDE C   (  13,X'S) H   ( 131,X'S) H   ( 132,X'S) H   ( 133,X'S) 
RIDE C   (  14,X'S) H   ( 141,X'S) H   ( 142,X'S) H   ( 143,X'S) 
RIDE C   (  16,X'S) H   ( 161,X'S) 
RIDE C   (  18,X'S) H   ( 181,X'S) H   ( 182,X'S) H   ( 183,X'S) 
RIDE C   (  19,X'S) H   ( 191,X'S) 
RIDE C   (  21,X'S) H   ( 211,X'S) H   ( 212,X'S) H   ( 213,X'S) 
RIDE C   (  22,X'S) H   ( 221,X'S) 
RIDE C   (  23,X'S) H   ( 231,X'S) 
RIDE C   (  24,X'S) H   ( 241,X'S) H   ( 242,X'S) H   ( 243,X'S) 
RIDE C   (  25,X'S) H   ( 251,X'S) H   ( 252,X'S) H   ( 253,X'S) 
RIDE C   (  26,X'S) H   ( 261,X'S) 
RIDE C   (  27,X'S) H   ( 271,X'S) H   ( 272,X'S) H   ( 273,X'S) 
RIDE C   (  28,X'S) H   ( 281,X'S) H   ( 282,X'S) H   ( 283,X'S) 
RIDE C   (  30,X'S) H   ( 301,X'S) 
RIDE C   (  32,X'S) H   ( 321,X'S) H   ( 322,X'S) H   ( 323,X'S) 
RIDE C   (  33,X'S) H   ( 331,X'S) 
RIDE C   (  35,X'S) H   ( 351,X'S) H   ( 352,X'S) H   ( 353,X'S) 
RIDE C   (  36,X'S) H   ( 361,X'S) 
RIDE C   (  37,X'S) H   ( 371,X'S) 
RIDE C   (  38,X'S) H   ( 381,X'S) H   ( 382,X'S) H   ( 383,X'S) 
RIDE C   (  39,X'S) H   ( 391,X'S) H   ( 392,X'S) H   ( 393,X'S) 
RIDE C   (  40,X'S) H   ( 401,X'S) 
RIDE C   (  41,X'S) H   ( 411,X'S) H   ( 412,X'S) H   ( 413,X'S) 
RIDE C   (  42,X'S) H   ( 421,X'S) H   ( 422,X'S) H   ( 423,X'S) 
RIDE C   ( 102,X'S) H   (1021,X'S) 
RIDE C   ( 104,X'S) H   (1041,X'S) H   (1042,X'S) H   (1043,X'S) 
RIDE C   ( 105,X'S) H   (1051,X'S) 
RIDE C   ( 107,X'S) H   (1071,X'S) H   (1072,X'S) H   (1073,X'S) 
RIDE C   ( 108,X'S) H   (1081,X'S) 
RIDE C   ( 109,X'S) H   (1091,X'S) 
RIDE C   ( 110,X'S) H   (1101,X'S) H   (1102,X'S) H   (1103,X'S) 
RIDE C   ( 111,X'S) H   (1111,X'S) H   (1112,X'S) H   (1113,X'S) 
RIDE C   ( 112,X'S) H   (1121,X'S) 
RIDE C   ( 113,X'S) H   (1131,X'S) H   (1132,X'S) H   (1133,X'S) 
RIDE C   ( 114,X'S) H   (1141,X'S) H   (1142,X'S) H   (1143,X'S) 
RIDE C   ( 116,X'S) H   (1161,X'S) 
RIDE C   ( 118,X'S) H   (1181,X'S) H   (1182,X'S) H   (1183,X'S) 
RIDE C   ( 119,X'S) H   (1191,X'S) 
RIDE C   ( 121,X'S) H   (1211,X'S) H   (1212,X'S) H   (1213,X'S) 
RIDE C   ( 122,X'S) H   (1221,X'S) 
RIDE C   ( 123,X'S) H   (1231,X'S) 
RIDE C   ( 124,X'S) H   (1241,X'S) H   (1242,X'S) H   (1243,X'S) 
RIDE C   ( 125,X'S) H   (1251,X'S) H   (1252,X'S) H   (1253,X'S) 
RIDE C   ( 126,X'S) H   (1261,X'S) 
RIDE C   ( 127,X'S) H   (1271,X'S) H   (1272,X'S) H   (1273,X'S) 
RIDE C   ( 128,X'S) H   (1281,X'S) H   (1282,X'S) H   (1283,X'S) 
RIDE C   ( 130,X'S) H   (1301,X'S) 
RIDE C   ( 132,X'S) H   (1321,X'S) H   (1322,X'S) H   (1323,X'S) 
RIDE C   ( 133,X'S) H   (1331,X'S) 
RIDE C   ( 135,X'S) H   (1351,X'S) H   (1352,X'S) H   (1353,X'S) 
RIDE C   ( 136,X'S) H   (1361,X'S) 
RIDE C   ( 137,X'S) H   (1371,X'S) 
RIDE C   ( 138,X'S) H   (1381,X'S) H   (1382,X'S) H   (1383,X'S) 
RIDE C   ( 139,X'S) H   (1391,X'S) H   (1392,X'S) H   (1393,X'S) 
RIDE C   ( 140,X'S) H   (1401,X'S) 
RIDE C   ( 141,X'S) H   (1411,X'S) H   (1412,X'S) H   (1413,X'S) 
RIDE C   ( 142,X'S) H   (1421,X'S) H   (1422,X'S) H   (1423,X'S) 
END                                                                             
#
# Punched on 26/02/14 at 20:04:45
#
#LIST     16                                                                    
NO 
REM   HREST   START (DO NOT REMOVE THIS LINE) 
REM   HREST   END (DO NOT REMOVE THIS LINE) 
END                                                                             
;

####

data_4
_audit_creation_date        "2014-01-28"
_audit_creation_method CRYSTALS_ver_14.43

_oxford_structure_analysis_title  'bw_305_0m in P-1'
_chemical_name_systematic         ?
_chemical_melting_point           ?

_vrf_PLAT201_4
;
PROBLEM: Isotropic non-H Atoms in Main Residue(s) .......          4     
         
RESPONSE: This flag arises due to partially disordered
isopropyl groups located on two of the ligands which were refined by 
using isotropic displacement parameters. 
;
_cell_length_a                    12.5760(3)
_cell_length_b                    19.1361(5)
_cell_length_c                    23.3330(5)
_cell_angle_alpha                 104.5924(12)
_cell_angle_beta                  91.5782(12)
_cell_angle_gamma                 93.0024(12)
_cell_volume                      5421.8(2)
 
_symmetry_cell_setting            'triclinic' 
_symmetry_space_group_name_H-M    'P -1 ' 
_symmetry_space_group_name_Hall   '-P 1 ' 
loop_
 _symmetry_equiv_pos_as_xyz
 'x,y,z'
 '-x,-y,-z'

loop_
_atom_type_symbol
_atom_type_scat_dispersion_real
_atom_type_scat_dispersion_imag
_atom_type_scat_Cromer_Mann_a1
_atom_type_scat_Cromer_Mann_b1
_atom_type_scat_Cromer_Mann_a2
_atom_type_scat_Cromer_Mann_b2
_atom_type_scat_Cromer_Mann_a3
_atom_type_scat_Cromer_Mann_b3
_atom_type_scat_Cromer_Mann_a4
_atom_type_scat_Cromer_Mann_b4
_atom_type_scat_Cromer_Mann_c
_atom_type_scat_source  
 C       0.0033   0.0016   2.3100  20.8439   1.0200  10.2075   1.5886   0.5687
   0.8650  51.6512   0.2156 'International Tables Vol C 4.2.6.8 and 6.1.1.4'
 H       0.0000   0.0000   0.4930  10.5109   0.3229  26.1257   0.1402   3.1424
   0.0408  57.7998   0.0030 'International Tables Vol C 4.2.6.8 and 6.1.1.4'
 N       0.0061   0.0033  12.2126   0.0057   3.1322   9.8933   2.0125  28.9975
   1.1663   0.5826 -11.5290 'International Tables Vol C 4.2.6.8 and 6.1.1.4'
 O       0.0106   0.0060   3.0485  13.2771   2.2868   5.7011   1.5463   0.3239
   0.8670  32.9089   0.2508 'International Tables Vol C 4.2.6.8 and 6.1.1.4'
 P       0.1023   0.0942   6.4345   1.9067   4.1791  27.1570   1.7800   0.5260
   1.4908  68.1645   1.1149 'International Tables Vol C 4.2.6.8 and 6.1.1.4'
 Ti      0.2776   0.4457   9.7595   7.8508   7.3558   0.5000   1.6991  35.6338
   1.9021 116.1050   1.2807 'International Tables Vol C 4.2.6.8 and 6.1.1.4'
 Co      0.3494   0.9721  12.2841   4.2791   7.3409   0.2784   4.0034  13.5359
   2.3488  71.1692   1.0118 'International Tables Vol C 4.2.6.8 and 6.1.1.4'
 
 
_cell_formula_units_Z                    4

# Given Formula = C50 H87 Co1 N5 O2 P3 Ti1 
# Dc =      1.21 Fooo =   2128.00 Mu =      5.82 M =   1980.06
# Found Formula = C50 H87 Co1 N5 O2 P3 Ti1 
# Dc =      1.21 FOOO =   2128.00 Mu =      5.82 M =   1980.05

_chemical_formula_sum             'C50 H87 Co1 N5 O2 P3 Ti1'
_chemical_formula_moiety          'C50 H87 Co1 N5 O2 P3 Ti1'
_chemical_compound_source                ?
_chemical_formula_weight            990.03
 
 
_cell_measurement_reflns_used         9699
_cell_measurement_theta_min              3
_cell_measurement_theta_max             30
_cell_measurement_temperature          120
 
_exptl_crystal_description        'prism' 
_exptl_crystal_colour             'red' 
_exptl_crystal_size_min           0.140 
_exptl_crystal_size_mid           0.190 
_exptl_crystal_size_max           0.430 
 
_exptl_crystal_density_diffrn     1.213 
_exptl_crystal_density_meas       ? 
_exptl_crystal_density_method     'not measured' 
# Non-dispersive F(000): 
_exptl_crystal_F_000              2128 
_exptl_absorpt_coefficient_mu     0.582 
 
# Sheldrick geometric approximatio 0.90 0.92 
_exptl_absorpt_correction_type    numerical 
_exptl_absorpt_process_details 
; 
 Analytical Absorption (De Meulenaer & Tompa, 1965) 
; 
_exptl_absorpt_correction_T_min   0.90 
_exptl_absorpt_correction_T_max   0.92 
_diffrn_measurement_device_type   'Bruker Kappa Apex2' 
_diffrn_measurement_device        'Area' 
_diffrn_radiation_monochromator   'graphite' 
_diffrn_radiation_type            'Mo K\a'
_diffrn_radiation_wavelength           0.71073
_diffrn_measurement_method        '\f & \w scans' 
 
# If a reference occurs more than once, delete the author 
# and date from subsequent references. 
_computing_data_collection        'Apex2 (Bruker AXS, 2006)' 
_computing_cell_refinement        'Apex2 (Bruker AXS, 2006)' 
_computing_data_reduction         'Apex2 (Bruker AXS, 2006)' 
_computing_structure_solution     'Superflip (Palatinus & Chapuis, 2007)' 
_computing_structure_refinement   'CRYSTALS (Betteridge et al., 2003)' 
_computing_publication_material   'CRYSTALS (Betteridge et al., 2003)' 
_computing_molecular_graphics     'CAMERON (Watkin et al., 1996)' 
 
_diffrn_standards_interval_time   . 
_diffrn_standards_interval_count  . 
_diffrn_standards_number          0 
_diffrn_standards_decay_%         ? 
 
_diffrn_ambient_temperature        120
_diffrn_reflns_number             139225 
_reflns_number_total              31584 
_diffrn_reflns_av_R_equivalents   0.050 
# Number of reflections without Friedels Law is 0 
# Number of reflections with Friedels Law is 31584 
# Theoretical number of reflections is about 63367 
 
 
_diffrn_reflns_theta_min          1.824 
_diffrn_reflns_theta_max          30.019 
_diffrn_measured_fraction_theta_max 0.997 
 
_diffrn_reflns_theta_full         30.019 
_diffrn_measured_fraction_theta_full 0.997 
 
 
_diffrn_reflns_limit_h_min        -17 
_diffrn_reflns_limit_h_max        17 
_diffrn_reflns_limit_k_min        -26 
_diffrn_reflns_limit_k_max        26 
_diffrn_reflns_limit_l_min        -32 
_diffrn_reflns_limit_l_max        32 
_reflns_limit_h_min               -17 
_reflns_limit_h_max               17 
_reflns_limit_k_min               -26 
_reflns_limit_k_max               26 
_reflns_limit_l_min               0 
_reflns_limit_l_max               32 
 
_oxford_diffrn_Wilson_B_factor    0.00 
_oxford_diffrn_Wilson_scale       0.00 
 
_atom_sites_solution_primary      Other  #heavy,direct,difmap,geom
# _atom_sites_solution_secondary  difmap
_atom_sites_solution_hydrogens    difmap
 
_refine_diff_density_min          -0.77 
_refine_diff_density_max          1.31 
 
 
# The current dictionary definitions do not cover the 
# situation where the reflections used for refinement were 
# selected by a user-defined sigma threshold 
 
 
# The values actually used during refinement 
_oxford_reflns_threshold_expression_ref     I>-10.0\s(I)
_refine_ls_number_reflns          31584 
_refine_ls_number_restraints      0 
_refine_ls_number_parameters      1115 
_oxford_refine_ls_R_factor_ref    0.0569 
_refine_ls_wR_factor_ref          0.0926 
_refine_ls_goodness_of_fit_ref    1.0000 
_refine_ls_shift/su_max           0.0100444 
_refine_ls_shift/su_mean          0.0004005 
 
 
# The values computed with all filters except I/sigma 
_oxford_reflns_number_all         31584 
_refine_ls_R_factor_all           0.0569 
_refine_ls_wR_factor_all          0.0926 
 
# The values computed with a 2 sigma cutoff - a la SHELX 
_reflns_threshold_expression      I>2.0\s(I)
_reflns_number_gt                 23301 
_refine_ls_R_factor_gt            0.0373 
_refine_ls_wR_factor_gt           0.0837 
 
# choose from: rm (reference molecule of known chirality), 
# ad (anomolous dispersion - Flack), rmad (rm and ad), 
# syn (from synthesis), unk (unknown) or . (not applicable). 
_chemical_absolute_configuration  '.' 
 
 
_refine_ls_structure_factor_coef  Fsqd 
_refine_ls_matrix_type            full
_refine_ls_hydrogen_treatment     constr         #undef, noref, refall,
                                                 # refxyz, refU, constr or mixed
_refine_ls_weighting_scheme       calc 
_refine_ls_weighting_details 
;
 Method= Modified Sheldrick 
 w=1/[\s^2^(F^2^) + ( 0.04P)^2^ + 4.09P] 
 ,where P=(max(Fo^2^,0) + 2Fc^2^)/3 
;
# Insert your own references if required - in alphabetical order 
_publ_section_references 
; 
Betteridge, P.W., Carruthers, J.R., Cooper, R.I., 
Prout, K. & Watkin, D.J. (2003). J. Appl. Cryst. 36, 1487. 
 
Bruker Analytical X-ray Systems, Inc., 2006. <i>Apex2</i>, 
Version 2 User Manual, M86-E01078, Madison, WI. 
 
De Meulenaer, J. & Tompa, H. (1965). Acta Cryst. 19, 1014. 
 
Palatinus, L. & Chapuis, G. (2007). J. Appl. Cryst. 40, 786-790. 
 
Watkin, D.J., Prout, C.K. & Pearce, L.J. (1996). CAMERON, Chemical 
Crystallography Laboratory, Oxford, UK. 
; 

# Uequiv = arithmetic mean of Ui i.e. Ueqiv = (U1+U2+U3)/3

# Replace last . with number of unfound hydrogen atoms attached to an atom.

# ..._refinement_flags_... 
# . no refinement constraints           S special position constraint on site
# G rigid group refinement of site      R riding atom
# D distance or angle restraint on site T thermal displacement constraints
# U Uiso or Uij restraint (rigid bond)  P partial occupancy constraint


loop_
_atom_site_label
_atom_site_type_symbol
_atom_site_fract_x
_atom_site_fract_y
_atom_site_fract_z
_atom_site_U_iso_or_equiv
_atom_site_occupancy
_atom_site_adp_type
_atom_site_refinement_flags_posn
_atom_site_refinement_flags_adp
_atom_site_refinement_flags_occupancy
_atom_site_disorder_assembly
_atom_site_disorder_group
_atom_site_attached_hydrogens
Co1 Co 0.756248(16) 0.779017(11) 0.332036(9) 0.0131 1.0000 Uani . . . . . . 
Co101 Co 0.190249(16) 0.304191(11) 0.300178(9) 0.0137 1.0000 Uani . . . . . . 
Ti1 Ti 0.62149(2) 0.830299(15) 0.297014(12) 0.0120 1.0000 Uani . . . . . . 
Ti101 Ti 0.20835(2) 0.270585(15) 0.202564(12) 0.0133 1.0000 Uani . . . . . . 
P1 P 0.76305(3) 0.89340(2) 0.384622(18) 0.0143 1.0000 Uani . . . . . . 
P2 P 0.79047(3) 0.77547(2) 0.238644(18) 0.0147 1.0000 Uani . . . . . . 
P3 P 0.61158(3) 0.71414(2) 0.343334(18) 0.0139 1.0000 Uani . . . . . . 
P101 P 0.17905(3) 0.18469(2) 0.273925(19) 0.0158 1.0000 Uani . . . . . . 
P102 P 0.05079(3) 0.34619(2) 0.262457(17) 0.0136 1.0000 Uani . . . . . . 
P103 P 0.34753(3) 0.35257(2) 0.285097(19) 0.0168 1.0000 Uani . . . . . . 
O1 O 0.47601(9) 0.87635(6) 0.26196(5) 0.0205 1.0000 Uani . . . . . . 
O2 O 0.80368(19) 0.37340(13) 0.47704(8) 0.0727 1.0000 Uani . . . . . . 
O3 O 0.27802(12) 0.57295(8) 0.06914(7) 0.0368 1.0000 Uani . . . . . . 
O101 O 0.23348(10) 0.25140(7) 0.10370(5) 0.0218 1.0000 Uani . . . . . . 
N1 N 0.66077(10) 0.92615(7) 0.35233(6) 0.0151 1.0000 Uani . . . . . . 
N2 N 0.68196(10) 0.81185(7) 0.21690(6) 0.0154 1.0000 Uani . . . . . . 
N3 N 0.51705(10) 0.75869(7) 0.31712(6) 0.0149 1.0000 Uani . . . . . . 
N4 N 0.86520(11) 0.73448(8) 0.36295(7) 0.0218 1.0000 Uani . . . . . . 
N5 N 0.92245(12) 0.70836(9) 0.38235(7) 0.0254 1.0000 Uani . . . . . . 
N101 N 0.18235(11) 0.16719(7) 0.19908(6) 0.0168 1.0000 Uani . . . . . . 
N102 N 0.08154(10) 0.32607(7) 0.19046(6) 0.0157 1.0000 Uani . . . . . . 
N103 N 0.36073(11) 0.31119(7) 0.21329(7) 0.0198 1.0000 Uani . . . . . . 
N104 N 0.17601(12) 0.32896(8) 0.38257(7) 0.0226 1.0000 Uani . . . . . . 
N105 N 0.16755(13) 0.34162(10) 0.42946(7) 0.0309 1.0000 Uani . . . . . . 
C1 C 0.65801(12) 0.99899(9) 0.34968(7) 0.0165 1.0000 Uani . . . . . . 
C2 C 0.69476(13) 1.01938(9) 0.30014(8) 0.0204 1.0000 Uani . . . . . . 
C3 C 0.69535(15) 1.09074(10) 0.29622(8) 0.0264 1.0000 Uani . . . . . . 
C4 C 0.7343(2) 1.11147(12) 0.24213(10) 0.0415 1.0000 Uani . . . . . . 
C5 C 0.65880(15) 1.14233(10) 0.34356(9) 0.0286 1.0000 Uani . . . . . . 
C6 C 0.62057(14) 1.12406(10) 0.39328(9) 0.0249 1.0000 Uani . . . . . . 
C7 C 0.58018(17) 1.18125(11) 0.44394(10) 0.0378 1.0000 Uani . . . . . . 
C8 C 0.61956(13) 1.05200(9) 0.39594(8) 0.0202 1.0000 Uani . . . . . . 
C9 C 0.74510(13) 0.92828(10) 0.46556(7) 0.0201 1.0000 Uani . . . . . . 
C10 C 0.63558(14) 0.90977(10) 0.48574(8) 0.0253 1.0000 Uani . . . . . . 
C11 C 0.83296(15) 0.90605(11) 0.50276(8) 0.0289 1.0000 Uani . . . . . . 
C12 C 0.88436(12) 0.95055(9) 0.37621(7) 0.0179 1.0000 Uani . . . . . . 
C13 C 0.89803(14) 1.02754(9) 0.41623(8) 0.0228 1.0000 Uani . . . . . . 
C14 C 0.98695(13) 0.91164(10) 0.37893(8) 0.0243 1.0000 Uani . . . . . . 
C15 C 0.63713(12) 0.81100(9) 0.16046(7) 0.0157 1.0000 Uani . . . . . . 
C16 C 0.58730(13) 0.74823(9) 0.12317(7) 0.0181 1.0000 Uani . . . . . . 
C17 C 0.53510(13) 0.74942(10) 0.07016(7) 0.0207 1.0000 Uani . . . . . . 
C18 C 0.47936(16) 0.68159(11) 0.03123(8) 0.0297 1.0000 Uani . . . . . . 
C19 C 0.53309(14) 0.81424(10) 0.05376(8) 0.0246 1.0000 Uani . . . . . . 
C20 C 0.58156(14) 0.87765(10) 0.08993(8) 0.0248 1.0000 Uani . . . . . . 
C21 C 0.5802(2) 0.94787(12) 0.07173(11) 0.0424 1.0000 Uani . . . . . . 
C22 C 0.63265(13) 0.87548(9) 0.14301(8) 0.0204 1.0000 Uani . . . . . . 
C23 C 0.90870(12) 0.83266(10) 0.22741(8) 0.0201 1.0000 Uani . . . . . . 
C24 C 0.91119(15) 0.86055(11) 0.17142(9) 0.0290 1.0000 Uani . . . . . . 
C25 C 1.01254(14) 0.79828(11) 0.23744(9) 0.0291 1.0000 Uani . . . . . . 
C26 C 0.80157(13) 0.68573(9) 0.18553(7) 0.0194 1.0000 Uani . . . . . . 
C27 C 0.84013(15) 0.68603(10) 0.12398(8) 0.0258 1.0000 Uani . . . . . . 
C28 C 0.86331(15) 0.63395(10) 0.21227(8) 0.0257 1.0000 Uani . . . . . . 
C29 C 0.40959(12) 0.75913(8) 0.33312(7) 0.0149 1.0000 Uani . . . . . . 
C30 C 0.37683(13) 0.81727(9) 0.37644(8) 0.0201 1.0000 Uani . . . . . . 
C31 C 0.27208(14) 0.81985(10) 0.39401(8) 0.0242 1.0000 Uani . . . . . . 
C32 C 0.24023(16) 0.88374(12) 0.44119(10) 0.0393 1.0000 Uani . . . . . . 
C33 C 0.19931(13) 0.76297(10) 0.36742(8) 0.0220 1.0000 Uani . . . . . . 
C34 C 0.22960(12) 0.70420(9) 0.32392(7) 0.0177 1.0000 Uani . . . . . . 
C35 C 0.15007(14) 0.64246(10) 0.29652(9) 0.0268 1.0000 Uani . . . . . . 
C36 C 0.33476(12) 0.70313(9) 0.30665(7) 0.0160 1.0000 Uani . . . . . . 
C37 C 0.58121(13) 0.61689(9) 0.30566(7) 0.0182 1.0000 Uani . . . . . . 
C38 C 0.66270(15) 0.56930(10) 0.32457(9) 0.0280 1.0000 Uani . . . . . . 
C39 C 0.57190(14) 0.60216(10) 0.23833(8) 0.0225 1.0000 Uani . . . . . . 
C40 C 0.57722(13) 0.71670(9) 0.42131(7) 0.0185 1.0000 Uani . . . . . . 
C41 C 0.67463(14) 0.71106(11) 0.46004(8) 0.0252 1.0000 Uani . . . . . . 
C42 C 0.48585(14) 0.66497(10) 0.43026(8) 0.0234 1.0000 Uani . . . . . . 
C43 C 0.42548(16) 0.94221(11) 0.28826(13) 0.0459 1.0000 Uani . . . . . . 
C44 C 0.31229(16) 0.93194(12) 0.26226(12) 0.0402 1.0000 Uani . . . . . . 
C45 C 0.29477(14) 0.85193(11) 0.23384(9) 0.0301 1.0000 Uani . . . . . . 
C46 C 0.40472(13) 0.83151(11) 0.21570(8) 0.0247 1.0000 Uani . . . . . . 
C47 C 0.7272(4) 0.4789(2) 0.4650(2) 0.1289 1.0000 Uani . . . . . . 
C48 C 0.7965(4) 0.4459(2) 0.49608(16) 0.1129 1.0000 Uani . . . . . . 
C49 C 0.8735(4) 0.3399(3) 0.50541(18) 0.1145 1.0000 Uani . . . . . . 
C50 C 0.8790(3) 0.2652(2) 0.48327(14) 0.0830 1.0000 Uani . . . . . . 
C51 C 0.2256(2) 0.67369(13) 0.14186(11) 0.0480 1.0000 Uani . . . . . . 
C52 C 0.2774(2) 0.60321(14) 0.13115(10) 0.0457 1.0000 Uani . . . . . . 
C53 C 0.3208(2) 0.50416(15) 0.05336(14) 0.0600 1.0000 Uani . . . . . . 
C54 C 0.3280(3) 0.48202(16) -0.01272(15) 0.0668 1.0000 Uani . . . . . . 
C101 C 0.14764(13) 0.10116(9) 0.15877(7) 0.0180 1.0000 Uani . . . . . . 
C102 C 0.04283(14) 0.08931(10) 0.13611(8) 0.0229 1.0000 Uani . . . . . . 
C103 C 0.00655(16) 0.02371(11) 0.09787(8) 0.0289 1.0000 Uani . . . . . . 
C104 C -0.10828(18) 0.01083(14) 0.07571(11) 0.0445 1.0000 Uani . . . . . . 
C105 C 0.07791(18) -0.03011(11) 0.08129(9) 0.0337 1.0000 Uani . . . . . . 
C106 C 0.18380(17) -0.01937(11) 0.10209(9) 0.0324 1.0000 Uani . . . . . . 
C107 C 0.2613(2) -0.07809(13) 0.08334(12) 0.0538 1.0000 Uani . . . . . . 
C108 C 0.21774(15) 0.04624(9) 0.14050(8) 0.0233 1.0000 Uani . . . . . . 
C109 C 0.28182(15) 0.12876(10) 0.29583(9) 0.0270 1.0000 Uani . . . . . . 
C110 C 0.38976(14) 0.13960(10) 0.27088(9) 0.0271 1.0000 Uani . . . . . . 
C112 C 0.05291(14) 0.13706(9) 0.28808(8) 0.0211 1.0000 Uani . . . . . . 
C113 C 0.05129(16) 0.05424(10) 0.27685(9) 0.0292 1.0000 Uani . . . . . . 
C114 C 0.01058(15) 0.17063(10) 0.34878(9) 0.0270 1.0000 Uani . . . . . . 
C115 C 0.03484(12) 0.34503(9) 0.14111(7) 0.0159 1.0000 Uani . . . . . . 
C116 C 0.04331(13) 0.41582(9) 0.13520(7) 0.0180 1.0000 Uani . . . . . . 
C117 C -0.00246(13) 0.43423(9) 0.08641(7) 0.0199 1.0000 Uani . . . . . . 
C118 C 0.00800(17) 0.51148(10) 0.08197(8) 0.0287 1.0000 Uani . . . . . . 
C119 C -0.05675(14) 0.38069(10) 0.04245(7) 0.0221 1.0000 Uani . . . . . . 
C120 C -0.06372(14) 0.30914(10) 0.04620(7) 0.0223 1.0000 Uani . . . . . . 
C121 C -0.12024(17) 0.25111(11) -0.00258(8) 0.0328 1.0000 Uani . . . . . . 
C122 C -0.01750(13) 0.29189(9) 0.09515(7) 0.0195 1.0000 Uani . . . . . . 
C123 C -0.08084(13) 0.29843(9) 0.26651(7) 0.0181 1.0000 Uani . . . . . . 
C124 C -0.16750(14) 0.29943(10) 0.21960(8) 0.0253 1.0000 Uani . . . . . . 
C125 C -0.12453(14) 0.32043(10) 0.32859(8) 0.0249 1.0000 Uani . . . . . . 
C126 C 0.02723(13) 0.44482(9) 0.28865(7) 0.0182 1.0000 Uani . . . . . . 
C127 C -0.07267(14) 0.47248(10) 0.26491(8) 0.0244 1.0000 Uani . . . . . . 
C128 C 0.03360(15) 0.47138(10) 0.35649(8) 0.0255 1.0000 Uani . . . . . . 
C129 C 0.45311(13) 0.30248(9) 0.18000(8) 0.0194 1.0000 Uani . . . . . . 
C130 C 0.47733(14) 0.23294(10) 0.14956(8) 0.0215 1.0000 Uani . . . . . . 
C131 C 0.56736(15) 0.22088(11) 0.11607(8) 0.0258 1.0000 Uani . . . . . . 
C132 C 0.59536(19) 0.14479(12) 0.08687(9) 0.0380 1.0000 Uani . . . . . . 
C133 C 0.63336(14) 0.27972(12) 0.11155(8) 0.0283 1.0000 Uani . . . . . . 
C134 C 0.61135(14) 0.34948(11) 0.14093(9) 0.0271 1.0000 Uani . . . . . . 
C135 C 0.68301(17) 0.41305(13) 0.13625(11) 0.0421 1.0000 Uani . . . . . . 
C136 C 0.52169(14) 0.36033(10) 0.17505(9) 0.0246 1.0000 Uani . . . . . . 
C137 C 0.37033(13) 0.45155(9) 0.29142(8) 0.0202 1.0000 Uani . . . . . . 
C138 C 0.32866(19) 0.49628(11) 0.34907(9) 0.0356 1.0000 Uani . . . . . . 
C139 C 0.31713(14) 0.47173(10) 0.23878(8) 0.0236 1.0000 Uani . . . . . . 
C143 C 0.23076(18) 0.18826(11) 0.05460(8) 0.0326 1.0000 Uani . . . . . . 
C144 C 0.19351(17) 0.21393(11) 0.00119(8) 0.0311 1.0000 Uani . . . . . . 
C145 C 0.22275(15) 0.29597(11) 0.01840(8) 0.0283 1.0000 Uani . . . . . . 
C146 C 0.27322(16) 0.31023(10) 0.08016(8) 0.0259 1.0000 Uani . . . . . . 
C211 C 0.3031(4) 0.1599(4) 0.3681(2) 0.0275(15) 0.432(12) Uiso . . P 1 3 . 
C212 C 0.2828(3) 0.1283(3) 0.35761(18) 0.0320(12) 0.568(12) Uiso . . P 1 4 . 
C240 C 0.4519(3) 0.3764(2) 0.40066(18) 0.0329(11) 0.498(6) Uiso . . P 1 1 . 
C241 C 0.4568(3) 0.3349(2) 0.3366(2) 0.0171(9) 0.498(6) Uiso . . P 1 1 . 
C242 C 0.5707(3) 0.3417(3) 0.31484(17) 0.0230(9) 0.498(6) Uiso . . P 1 1 . 
C243 C 0.4469(3) 0.3279(2) 0.38466(18) 0.0309(11) 0.502(6) Uiso . . P 1 2 . 
C244 C 0.4708(3) 0.3296(2) 0.3208(2) 0.0189(9) 0.502(6) Uiso . . P 1 2 . 
C245 C 0.5730(3) 0.3759(3) 0.32170(18) 0.0273(9) 0.502(6) Uiso . . P 1 2 . 
H21 H 0.7210 0.9847 0.2695 0.0251 1.0000 Uiso R . . . . . 
H41 H 0.6800 1.1350 0.2267 0.0630 1.0000 Uiso R . . . . . 
H42 H 0.7953 1.1443 0.2510 0.0626 1.0000 Uiso R . . . . . 
H43 H 0.7499 1.0711 0.2127 0.0631 1.0000 Uiso R . . . . . 
H51 H 0.6589 1.1908 0.3416 0.0341 1.0000 Uiso R . . . . . 
H71 H 0.5759 1.1656 0.4795 0.0584 1.0000 Uiso R . . . . . 
H72 H 0.5105 1.1920 0.4344 0.0590 1.0000 Uiso R . . . . . 
H73 H 0.6242 1.2248 0.4521 0.0581 1.0000 Uiso R . . . . . 
H81 H 0.5918 1.0391 0.4292 0.0232 1.0000 Uiso R . . . . . 
H91 H 0.7519 0.9810 0.4712 0.0234 1.0000 Uiso R . . . . . 
H101 H 0.5799 0.9159 0.4585 0.0377 1.0000 Uiso R . . . . . 
H102 H 0.6330 0.8607 0.4888 0.0375 1.0000 Uiso R . . . . . 
H103 H 0.6255 0.9411 0.5244 0.0380 1.0000 Uiso R . . . . . 
H111 H 0.8321 0.8543 0.4968 0.0408 1.0000 Uiso R . . . . . 
H112 H 0.8252 0.9272 0.5443 0.0435 1.0000 Uiso R . . . . . 
H113 H 0.9027 0.9220 0.4948 0.0428 1.0000 Uiso R . . . . . 
H121 H 0.8754 0.9547 0.3359 0.0206 1.0000 Uiso R . . . . . 
H131 H 0.8376 1.0549 0.4138 0.0329 1.0000 Uiso R . . . . . 
H132 H 0.9093 1.0250 0.4567 0.0329 1.0000 Uiso R . . . . . 
H133 H 0.9602 1.0516 0.4041 0.0341 1.0000 Uiso R . . . . . 
H141 H 1.0444 0.9357 0.3629 0.0382 1.0000 Uiso R . . . . . 
H142 H 1.0067 0.9137 0.4196 0.0365 1.0000 Uiso R . . . . . 
H143 H 0.9770 0.8621 0.3571 0.0353 1.0000 Uiso R . . . . . 
H161 H 0.5869 0.7045 0.1350 0.0212 1.0000 Uiso R . . . . . 
H181 H 0.5118 0.6674 -0.0052 0.0460 1.0000 Uiso R . . . . . 
H182 H 0.4076 0.6874 0.0235 0.0465 1.0000 Uiso R . . . . . 
H183 H 0.4817 0.6433 0.0494 0.0453 1.0000 Uiso R . . . . . 
H191 H 0.4979 0.8140 0.0177 0.0299 1.0000 Uiso R . . . . . 
H211 H 0.5223 0.9467 0.0456 0.0635 1.0000 Uiso R . . . . . 
H212 H 0.5755 0.9869 0.1042 0.0642 1.0000 Uiso R . . . . . 
H213 H 0.6406 0.9552 0.0520 0.0642 1.0000 Uiso R . . . . . 
H221 H 0.6632 0.9183 0.1683 0.0251 1.0000 Uiso R . . . . . 
H231 H 0.9056 0.8755 0.2597 0.0223 1.0000 Uiso R . . . . . 
H241 H 0.9691 0.8977 0.1765 0.0437 1.0000 Uiso R . . . . . 
H242 H 0.9243 0.8225 0.1372 0.0440 1.0000 Uiso R . . . . . 
H243 H 0.8459 0.8818 0.1652 0.0438 1.0000 Uiso R . . . . . 
H251 H 1.0708 0.8351 0.2458 0.0433 1.0000 Uiso R . . . . . 
H252 H 1.0078 0.7763 0.2709 0.0430 1.0000 Uiso R . . . . . 
H253 H 1.0280 0.7612 0.2023 0.0439 1.0000 Uiso R . . . . . 
H261 H 0.7291 0.6662 0.1801 0.0229 1.0000 Uiso R . . . . . 
H271 H 0.8266 0.6383 0.0979 0.0390 1.0000 Uiso R . . . . . 
H272 H 0.8016 0.7206 0.1077 0.0371 1.0000 Uiso R . . . . . 
H273 H 0.9155 0.6979 0.1255 0.0385 1.0000 Uiso R . . . . . 
H281 H 0.9399 0.6461 0.2136 0.0378 1.0000 Uiso R . . . . . 
H282 H 0.8497 0.5849 0.1870 0.0385 1.0000 Uiso R . . . . . 
H283 H 0.8402 0.6345 0.2515 0.0380 1.0000 Uiso R . . . . . 
H301 H 0.4265 0.8549 0.3945 0.0234 1.0000 Uiso R . . . . . 
H321 H 0.2939 0.9001 0.4715 0.0603 1.0000 Uiso R . . . . . 
H322 H 0.1786 0.8714 0.4589 0.0591 1.0000 Uiso R . . . . . 
H323 H 0.2229 0.9230 0.4246 0.0599 1.0000 Uiso R . . . . . 
H331 H 0.1289 0.7642 0.3783 0.0257 1.0000 Uiso R . . . . . 
H351 H 0.1572 0.6024 0.3129 0.0431 1.0000 Uiso R . . . . . 
H352 H 0.1574 0.6241 0.2555 0.0431 1.0000 Uiso R . . . . . 
H353 H 0.0786 0.6549 0.3022 0.0423 1.0000 Uiso R . . . . . 
H361 H 0.3561 0.6637 0.2767 0.0197 1.0000 Uiso R . . . . . 
H371 H 0.5111 0.6046 0.3191 0.0217 1.0000 Uiso R . . . . . 
H381 H 0.6581 0.5686 0.3654 0.0413 1.0000 Uiso R . . . . . 
H382 H 0.6529 0.5202 0.3011 0.0408 1.0000 Uiso R . . . . . 
H383 H 0.7326 0.5865 0.3194 0.0421 1.0000 Uiso R . . . . . 
H391 H 0.5372 0.6401 0.2259 0.0332 1.0000 Uiso R . . . . . 
H392 H 0.6405 0.5985 0.2214 0.0335 1.0000 Uiso R . . . . . 
H393 H 0.5327 0.5571 0.2221 0.0345 1.0000 Uiso R . . . . . 
H401 H 0.5534 0.7660 0.4347 0.0214 1.0000 Uiso R . . . . . 
H411 H 0.7319 0.7441 0.4561 0.0379 1.0000 Uiso R . . . . . 
H412 H 0.6998 0.6629 0.4499 0.0377 1.0000 Uiso R . . . . . 
H413 H 0.6569 0.7222 0.5003 0.0379 1.0000 Uiso R . . . . . 
H421 H 0.4224 0.6694 0.4073 0.0335 1.0000 Uiso R . . . . . 
H422 H 0.5051 0.6152 0.4184 0.0339 1.0000 Uiso R . . . . . 
H423 H 0.4701 0.6773 0.4723 0.0345 1.0000 Uiso R . . . . . 
H431 H 0.4273 0.9484 0.3313 0.0554 1.0000 Uiso R . . . . . 
H432 H 0.4641 0.9829 0.2800 0.0556 1.0000 Uiso R . . . . . 
H441 H 0.3028 0.9598 0.2319 0.0495 1.0000 Uiso R . . . . . 
H442 H 0.2661 0.9458 0.2944 0.0467 1.0000 Uiso R . . . . . 
H451 H 0.2433 0.8433 0.1994 0.0357 1.0000 Uiso R . . . . . 
H452 H 0.2673 0.8250 0.2636 0.0362 1.0000 Uiso R . . . . . 
H461 H 0.4146 0.7799 0.2137 0.0305 1.0000 Uiso R . . . . . 
H462 H 0.4213 0.8417 0.1784 0.0301 1.0000 Uiso R . . . . . 
H471 H 0.7340 0.4634 0.4234 0.1924 1.0000 Uiso R . . . . . 
H472 H 0.6564 0.4643 0.4737 0.1929 1.0000 Uiso R . . . . . 
H473 H 0.7323 0.5302 0.4777 0.1926 1.0000 Uiso R . . . . . 
H481 H 0.7873 0.4597 0.5385 0.1347 1.0000 Uiso R . . . . . 
H482 H 0.8669 0.4656 0.4897 0.1367 1.0000 Uiso R . . . . . 
H491 H 0.9409 0.3613 0.4970 0.1386 1.0000 Uiso R . . . . . 
H492 H 0.8680 0.3552 0.5481 0.1366 1.0000 Uiso R . . . . . 
H501 H 0.9394 0.2459 0.4990 0.1239 1.0000 Uiso R . . . . . 
H502 H 0.8736 0.2499 0.4410 0.1241 1.0000 Uiso R . . . . . 
H503 H 0.8167 0.2441 0.4973 0.1249 1.0000 Uiso R . . . . . 
H511 H 0.1535 0.6668 0.1262 0.0717 1.0000 Uiso R . . . . . 
H512 H 0.2653 0.7061 0.1228 0.0715 1.0000 Uiso R . . . . . 
H513 H 0.2263 0.6954 0.1841 0.0712 1.0000 Uiso R . . . . . 
H521 H 0.3509 0.6094 0.1473 0.0560 1.0000 Uiso R . . . . . 
H522 H 0.2386 0.5688 0.1493 0.0551 1.0000 Uiso R . . . . . 
H531 H 0.2747 0.4699 0.0669 0.0725 1.0000 Uiso R . . . . . 
H532 H 0.3914 0.5061 0.0724 0.0719 1.0000 Uiso R . . . . . 
H541 H 0.3806 0.5140 -0.0259 0.0995 1.0000 Uiso R . . . . . 
H542 H 0.2575 0.4846 -0.0305 0.0999 1.0000 Uiso R . . . . . 
H543 H 0.3488 0.4319 -0.0245 0.1000 1.0000 Uiso R . . . . . 
H1021 H -0.0039 0.1259 0.1473 0.0273 1.0000 Uiso R . . . . . 
H1041 H -0.1158 -0.0099 0.0348 0.0676 1.0000 Uiso R . . . . . 
H1042 H -0.1444 0.0538 0.0825 0.0671 1.0000 Uiso R . . . . . 
H1043 H -0.1484 -0.0195 0.0944 0.0679 1.0000 Uiso R . . . . . 
H1051 H 0.0536 -0.0757 0.0553 0.0401 1.0000 Uiso R . . . . . 
H1071 H 0.2327 -0.1242 0.0866 0.0809 1.0000 Uiso R . . . . . 
H1072 H 0.3277 -0.0652 0.1055 0.0813 1.0000 Uiso R . . . . . 
H1073 H 0.2739 -0.0818 0.0432 0.0814 1.0000 Uiso R . . . . . 
H1081 H 0.2894 0.0543 0.1540 0.0276 1.0000 Uiso R . . . . . 
H1091 H 0.2569 0.0783 0.2854 0.0319 0.432(12) Uiso R . P 1 3 . 
H1092 H 0.2565 0.0799 0.2753 0.0317 0.568(12) Uiso R . P 1 4 . 
H1101 H 0.4247 0.1836 0.2920 0.0457 1.0000 Uiso R . . . . . 
H1102 H 0.3875 0.1397 0.2306 0.0444 1.0000 Uiso R . . . . . 
H1103 H 0.4368 0.1050 0.2758 0.0436 1.0000 Uiso R . . . . . 
H1121 H 0.0038 0.1468 0.2587 0.0243 1.0000 Uiso R . . . . . 
H1131 H -0.0223 0.0363 0.2773 0.0442 1.0000 Uiso R . . . . . 
H1132 H 0.0784 0.0315 0.2395 0.0427 1.0000 Uiso R . . . . . 
H1133 H 0.0907 0.0412 0.3090 0.0433 1.0000 Uiso R . . . . . 
H1141 H 0.0105 0.2224 0.3555 0.0403 1.0000 Uiso R . . . . . 
H1142 H 0.0518 0.1589 0.3803 0.0402 1.0000 Uiso R . . . . . 
H1143 H -0.0625 0.1524 0.3506 0.0406 1.0000 Uiso R . . . . . 
H1161 H 0.0799 0.4516 0.1651 0.0220 1.0000 Uiso R . . . . . 
H1181 H -0.0508 0.5214 0.0591 0.0432 1.0000 Uiso R . . . . . 
H1182 H 0.0713 0.5198 0.0631 0.0434 1.0000 Uiso R . . . . . 
H1183 H 0.0097 0.5432 0.1194 0.0437 1.0000 Uiso R . . . . . 
H1191 H -0.0910 0.3931 0.0103 0.0270 1.0000 Uiso R . . . . . 
H1211 H -0.1336 0.2080 0.0100 0.0499 1.0000 Uiso R . . . . . 
H1212 H -0.1870 0.2650 -0.0139 0.0501 1.0000 Uiso R . . . . . 
H1213 H -0.0794 0.2395 -0.0367 0.0496 1.0000 Uiso R . . . . . 
H1221 H -0.0225 0.2427 0.0981 0.0222 1.0000 Uiso R . . . . . 
H1231 H -0.0610 0.2490 0.2607 0.0218 1.0000 Uiso R . . . . . 
H1241 H -0.2286 0.2693 0.2250 0.0379 1.0000 Uiso R . . . . . 
H1242 H -0.1449 0.2802 0.1808 0.0390 1.0000 Uiso R . . . . . 
H1243 H -0.1896 0.3469 0.2226 0.0376 1.0000 Uiso R . . . . . 
H1251 H -0.1763 0.2830 0.3328 0.0362 1.0000 Uiso R . . . . . 
H1252 H -0.0693 0.3269 0.3590 0.0361 1.0000 Uiso R . . . . . 
H1253 H -0.1583 0.3661 0.3339 0.0359 1.0000 Uiso R . . . . . 
H1261 H 0.0881 0.4680 0.2745 0.0209 1.0000 Uiso R . . . . . 
H1271 H -0.1352 0.4568 0.2823 0.0359 1.0000 Uiso R . . . . . 
H1272 H -0.0667 0.5240 0.2761 0.0369 1.0000 Uiso R . . . . . 
H1273 H -0.0816 0.4567 0.2229 0.0356 1.0000 Uiso R . . . . . 
H1281 H -0.0313 0.4582 0.3723 0.0383 1.0000 Uiso R . . . . . 
H1282 H 0.0913 0.4518 0.3735 0.0373 1.0000 Uiso R . . . . . 
H1283 H 0.0434 0.5235 0.3678 0.0380 1.0000 Uiso R . . . . . 
H1301 H 0.4322 0.1935 0.1526 0.0267 1.0000 Uiso R . . . . . 
H1321 H 0.5314 0.1134 0.0779 0.0579 1.0000 Uiso R . . . . . 
H1322 H 0.6408 0.1272 0.1127 0.0572 1.0000 Uiso R . . . . . 
H1323 H 0.6296 0.1421 0.0503 0.0570 1.0000 Uiso R . . . . . 
H1331 H 0.6931 0.2717 0.0883 0.0346 1.0000 Uiso R . . . . . 
H1351 H 0.7409 0.3977 0.1138 0.0645 1.0000 Uiso R . . . . . 
H1352 H 0.7077 0.4413 0.1749 0.0645 1.0000 Uiso R . . . . . 
H1353 H 0.6456 0.4435 0.1182 0.0625 1.0000 Uiso R . . . . . 
H1361 H 0.5074 0.4075 0.1948 0.0304 1.0000 Uiso R . . . . . 
H1371 H 0.4471 0.4627 0.2916 0.0232 1.0000 Uiso R . . . . . 
H1381 H 0.3352 0.5480 0.3509 0.0533 1.0000 Uiso R . . . . . 
H1382 H 0.2532 0.4830 0.3524 0.0543 1.0000 Uiso R . . . . . 
H1383 H 0.3683 0.4882 0.3818 0.0532 1.0000 Uiso R . . . . . 
H1391 H 0.3225 0.5231 0.2440 0.0349 1.0000 Uiso R . . . . . 
H1392 H 0.2437 0.4562 0.2359 0.0352 1.0000 Uiso R . . . . . 
H1393 H 0.3478 0.4479 0.2016 0.0355 1.0000 Uiso R . . . . . 
H1431 H 0.3031 0.1707 0.0491 0.0402 1.0000 Uiso R . . . . . 
H1432 H 0.1816 0.1515 0.0623 0.0395 1.0000 Uiso R . . . . . 
H1441 H 0.2291 0.1891 -0.0334 0.0378 1.0000 Uiso R . . . . . 
H1442 H 0.1167 0.2042 -0.0048 0.0378 1.0000 Uiso R . . . . . 
H1451 H 0.1590 0.3235 0.0188 0.0345 1.0000 Uiso R . . . . . 
H1452 H 0.2727 0.3106 -0.0084 0.0344 1.0000 Uiso R . . . . . 
H1461 H 0.2540 0.3557 0.1066 0.0313 1.0000 Uiso R . . . . . 
H1462 H 0.3498 0.3103 0.0787 0.0308 1.0000 Uiso R . . . . . 
H2111 H 0.3291 0.2090 0.3789 0.0446 0.432(12) Uiso R . P 1 3 . 
H2112 H 0.3554 0.1313 0.3808 0.0451 0.432(12) Uiso R . P 1 3 . 
H2113 H 0.2373 0.1555 0.3868 0.0449 0.432(12) Uiso R . P 1 3 . 
H2121 H 0.2177 0.1080 0.3673 0.0466 0.568(12) Uiso R . P 1 4 . 
H2122 H 0.3398 0.0998 0.3664 0.0466 0.568(12) Uiso R . P 1 4 . 
H2123 H 0.2940 0.1779 0.3824 0.0455 0.568(12) Uiso R . P 1 4 . 
H2401 H 0.5008 0.3555 0.4241 0.0497 0.498(6) Uiso R . P 1 1 . 
H2402 H 0.4728 0.4256 0.4045 0.0490 0.498(6) Uiso R . P 1 1 . 
H2403 H 0.3808 0.3727 0.4147 0.0500 0.498(6) Uiso R . P 1 1 . 
H2411 H 0.4436 0.2843 0.3360 0.0209 0.498(6) Uiso R . P 1 1 . 
H2421 H 0.5849 0.3898 0.3093 0.0339 0.498(6) Uiso R . P 1 1 . 
H2422 H 0.5794 0.3063 0.2781 0.0341 0.498(6) Uiso R . P 1 1 . 
H2423 H 0.6213 0.3338 0.3443 0.0340 0.498(6) Uiso R . P 1 1 . 
H2431 H 0.3885 0.2930 0.3843 0.0468 0.502(6) Uiso R . P 1 2 . 
H2432 H 0.4295 0.3749 0.4073 0.0468 0.502(6) Uiso R . P 1 2 . 
H2433 H 0.5093 0.3141 0.4039 0.0471 0.502(6) Uiso R . P 1 2 . 
H2441 H 0.4834 0.2809 0.2987 0.0233 0.502(6) Uiso R . P 1 2 . 
H2451 H 0.6297 0.3575 0.3425 0.0420 0.502(6) Uiso R . P 1 2 . 
H2452 H 0.5936 0.3734 0.2817 0.0418 0.502(6) Uiso R . P 1 2 . 
H2453 H 0.5643 0.4248 0.3429 0.0415 0.502(6) Uiso R . P 1 2 . 
loop_
_atom_site_aniso_label
_atom_site_aniso_U_11
_atom_site_aniso_U_22
_atom_site_aniso_U_33
_atom_site_aniso_U_23
_atom_site_aniso_U_13
_atom_site_aniso_U_12
Co1 0.00956(9) 0.01577(10) 0.01498(10) 0.00605(8) -0.00130(7) -0.00008(7) 
Co101 0.01449(10) 0.01294(10) 0.01431(10) 0.00518(8) -0.00168(8) -0.00080(8) 
Ti1 0.00957(12) 0.01298(13) 0.01362(13) 0.00404(10) -0.00138(9) -0.00048(9) 
Ti101 0.01391(12) 0.01157(13) 0.01474(13) 0.00438(10) 0.00042(10) -0.00027(10) 
P1 0.01215(17) 0.01709(19) 0.01379(18) 0.00491(15) -0.00223(14) -0.00256(14) 
P2 0.01133(17) 0.0185(2) 0.01511(19) 0.00580(15) 0.00009(14) 0.00187(14) 
P3 0.01174(17) 0.01384(18) 0.01692(19) 0.00566(15) -0.00068(14) 0.00011(14) 
P101 0.01735(19) 0.01363(19) 0.01814(19) 0.00731(16) 0.00030(15) 0.00014(15) 
P102 0.01366(18) 0.01406(18) 0.01355(18) 0.00432(15) 0.00005(14) 0.00082(14) 
P103 0.01410(18) 0.01436(19) 0.0219(2) 0.00576(16) -0.00283(15) -0.00170(15) 
O1 0.0139(5) 0.0204(6) 0.0279(6) 0.0080(5) -0.0051(5) 0.0002(4) 
O2 0.0949(17) 0.0794(16) 0.0350(10) -0.0004(10) -0.0094(10) 0.0064(13) 
O3 0.0394(8) 0.0312(8) 0.0413(9) 0.0130(7) -0.0021(7) -0.0015(6) 
O101 0.0295(6) 0.0208(6) 0.0155(6) 0.0052(5) 0.0046(5) 0.0000(5) 
N1 0.0147(6) 0.0142(6) 0.0161(6) 0.0041(5) -0.0027(5) -0.0008(5) 
N2 0.0143(6) 0.0186(7) 0.0142(6) 0.0051(5) -0.0012(5) 0.0033(5) 
N3 0.0106(6) 0.0146(6) 0.0203(7) 0.0064(5) -0.0006(5) -0.0006(5) 
N4 0.0153(6) 0.0264(8) 0.0247(7) 0.0089(6) 0.0026(6) -0.0020(6) 
N5 0.0237(7) 0.0327(9) 0.0259(8) 0.0197(7) -0.0035(6) -0.0009(6) 
N101 0.0192(6) 0.0130(6) 0.0177(6) 0.0034(5) -0.0002(5) -0.0012(5) 
N102 0.0172(6) 0.0169(6) 0.0136(6) 0.0052(5) -0.0010(5) 0.0021(5) 
N103 0.0159(6) 0.0154(7) 0.0265(7) 0.0025(6) 0.0037(5) -0.0013(5) 
N104 0.0215(7) 0.0228(7) 0.0236(8) 0.0067(6) -0.0033(6) 0.0002(6) 
N105 0.0332(9) 0.0412(10) 0.0201(8) 0.0120(7) -0.0032(6) 0.0010(7) 
C1 0.0139(7) 0.0160(7) 0.0189(8) 0.0042(6) -0.0051(6) -0.0010(6) 
C2 0.0207(8) 0.0201(8) 0.0192(8) 0.0045(7) -0.0041(6) -0.0033(6) 
C3 0.0277(9) 0.0249(9) 0.0286(9) 0.0128(8) -0.0078(7) -0.0062(7) 
C4 0.0582(15) 0.0353(12) 0.0365(12) 0.0231(10) -0.0041(10) -0.0125(10) 
C5 0.0270(9) 0.0177(8) 0.0426(11) 0.0124(8) -0.0097(8) -0.0019(7) 
C6 0.0190(8) 0.0196(8) 0.0332(10) 0.0017(7) -0.0072(7) 0.0030(6) 
C7 0.0359(11) 0.0246(10) 0.0470(13) -0.0031(9) -0.0023(9) 0.0106(8) 
C8 0.0163(7) 0.0213(8) 0.0219(8) 0.0035(7) -0.0024(6) 0.0006(6) 
C9 0.0211(8) 0.0224(8) 0.0155(7) 0.0042(6) -0.0018(6) -0.0053(6) 
C10 0.0260(9) 0.0274(9) 0.0209(8) 0.0044(7) 0.0030(7) -0.0057(7) 
C11 0.0265(9) 0.0401(11) 0.0209(9) 0.0120(8) -0.0073(7) -0.0081(8) 
C12 0.0146(7) 0.0210(8) 0.0185(8) 0.0069(6) -0.0026(6) -0.0038(6) 
C13 0.0205(8) 0.0214(8) 0.0250(9) 0.0055(7) -0.0036(7) -0.0079(6) 
C14 0.0150(8) 0.0300(10) 0.0287(9) 0.0101(8) -0.0026(7) -0.0031(7) 
C15 0.0138(7) 0.0209(8) 0.0131(7) 0.0049(6) 0.0006(5) 0.0029(6) 
C16 0.0161(7) 0.0190(8) 0.0199(8) 0.0062(6) 0.0008(6) 0.0017(6) 
C17 0.0163(7) 0.0264(9) 0.0178(8) 0.0033(7) -0.0013(6) -0.0009(6) 
C18 0.0288(10) 0.0316(10) 0.0246(9) 0.0016(8) -0.0075(7) -0.0044(8) 
C19 0.0234(8) 0.0330(10) 0.0194(8) 0.0115(7) -0.0064(7) -0.0008(7) 
C20 0.0257(9) 0.0256(9) 0.0258(9) 0.0126(7) -0.0044(7) -0.0003(7) 
C21 0.0521(14) 0.0349(12) 0.0458(13) 0.0252(10) -0.0211(11) -0.0078(10) 
C22 0.0214(8) 0.0202(8) 0.0208(8) 0.0078(7) -0.0031(6) -0.0004(6) 
C23 0.0134(7) 0.0257(9) 0.0210(8) 0.0059(7) 0.0032(6) -0.0011(6) 
C24 0.0261(9) 0.0360(11) 0.0270(9) 0.0130(8) 0.0045(7) -0.0057(8) 
C25 0.0132(8) 0.0413(11) 0.0317(10) 0.0074(9) 0.0021(7) 0.0016(7) 
C26 0.0186(8) 0.0190(8) 0.0205(8) 0.0042(7) 0.0005(6) 0.0037(6) 
C27 0.0296(9) 0.0273(9) 0.0190(8) 0.0024(7) 0.0011(7) 0.0064(7) 
C28 0.0278(9) 0.0244(9) 0.0268(9) 0.0082(7) 0.0013(7) 0.0101(7) 
C29 0.0111(7) 0.0173(7) 0.0177(7) 0.0074(6) -0.0008(5) 0.0006(5) 
C30 0.0139(7) 0.0191(8) 0.0238(8) -0.0004(7) -0.0049(6) 0.0011(6) 
C31 0.0176(8) 0.0300(9) 0.0212(8) -0.0015(7) -0.0025(6) 0.0075(7) 
C32 0.0234(9) 0.0462(13) 0.0354(11) -0.0152(10) -0.0044(8) 0.0125(9) 
C33 0.0128(7) 0.0309(9) 0.0225(8) 0.0065(7) 0.0008(6) 0.0042(6) 
C34 0.0127(7) 0.0190(8) 0.0227(8) 0.0084(6) -0.0017(6) -0.0014(6) 
C35 0.0147(8) 0.0230(9) 0.0413(11) 0.0064(8) 0.0007(7) -0.0037(7) 
C36 0.0140(7) 0.0146(7) 0.0197(8) 0.0049(6) 0.0001(6) 0.0006(6) 
C37 0.0181(7) 0.0143(7) 0.0226(8) 0.0053(6) 0.0014(6) 0.0005(6) 
C38 0.0289(9) 0.0191(9) 0.0377(11) 0.0097(8) 0.0009(8) 0.0051(7) 
C39 0.0231(8) 0.0190(8) 0.0233(8) 0.0020(7) 0.0025(7) -0.0021(6) 
C40 0.0185(8) 0.0193(8) 0.0187(8) 0.0072(6) 0.0005(6) -0.0011(6) 
C41 0.0246(9) 0.0309(10) 0.0217(9) 0.0107(7) -0.0038(7) -0.0019(7) 
C42 0.0239(8) 0.0247(9) 0.0234(9) 0.0103(7) 0.0028(7) -0.0047(7) 
C43 0.0250(10) 0.0182(9) 0.0877(19) 0.0020(11) -0.0174(11) 0.0053(8) 
C44 0.0215(9) 0.0327(11) 0.0639(15) 0.0073(10) -0.0070(9) 0.0091(8) 
C45 0.0162(8) 0.0371(11) 0.0354(10) 0.0068(9) -0.0027(7) 0.0019(7) 
C46 0.0155(8) 0.0344(10) 0.0239(9) 0.0078(8) -0.0048(6) 0.0011(7) 
C47 0.177(5) 0.085(3) 0.098(3) -0.024(2) -0.077(3) 0.037(3) 
C48 0.184(5) 0.093(3) 0.0446(19) -0.0171(19) -0.022(2) 0.035(3) 
C49 0.167(5) 0.103(3) 0.064(2) 0.004(2) -0.036(3) 0.024(3) 
C50 0.097(3) 0.112(3) 0.0407(16) 0.0174(19) 0.0083(17) 0.022(2) 
C51 0.0607(16) 0.0441(14) 0.0350(12) 0.0051(10) -0.0041(11) -0.0077(12) 
C52 0.0426(13) 0.0604(16) 0.0382(12) 0.0219(12) -0.0051(10) -0.0008(11) 
C53 0.0578(17) 0.0473(16) 0.085(2) 0.0314(15) 0.0175(15) 0.0171(13) 
C54 0.0645(19) 0.0443(16) 0.083(2) -0.0013(15) 0.0059(16) 0.0084(14) 
C101 0.0233(8) 0.0133(7) 0.0170(7) 0.0045(6) -0.0002(6) -0.0040(6) 
C102 0.0238(8) 0.0220(9) 0.0235(9) 0.0077(7) -0.0005(7) -0.0021(7) 
C103 0.0306(10) 0.0315(10) 0.0233(9) 0.0075(8) -0.0038(7) -0.0112(8) 
C104 0.0327(11) 0.0544(15) 0.0417(13) 0.0089(11) -0.0118(9) -0.0178(10) 
C105 0.0446(12) 0.0242(10) 0.0254(10) -0.0029(8) -0.0016(8) -0.0133(8) 
C106 0.0411(11) 0.0227(9) 0.0286(10) -0.0024(8) 0.0058(8) -0.0009(8) 
C107 0.0602(16) 0.0307(12) 0.0563(16) -0.0171(11) 0.0042(13) 0.0108(11) 
C108 0.0242(8) 0.0199(8) 0.0235(9) 0.0016(7) 0.0011(7) -0.0005(7) 
C109 0.0262(9) 0.0251(9) 0.0368(10) 0.0198(8) 0.0020(8) 0.0066(7) 
C110 0.0243(9) 0.0232(9) 0.0341(10) 0.0078(8) -0.0048(7) 0.0036(7) 
C112 0.0218(8) 0.0168(8) 0.0269(9) 0.0095(7) 0.0035(7) -0.0013(6) 
C113 0.0344(10) 0.0186(9) 0.0358(11) 0.0094(8) 0.0104(8) -0.0037(7) 
C114 0.0288(9) 0.0234(9) 0.0309(10) 0.0103(8) 0.0103(8) -0.0010(7) 
C115 0.0155(7) 0.0186(8) 0.0146(7) 0.0060(6) 0.0013(6) 0.0020(6) 
C116 0.0210(8) 0.0166(8) 0.0166(7) 0.0047(6) 0.0010(6) 0.0002(6) 
C117 0.0224(8) 0.0210(8) 0.0194(8) 0.0097(7) 0.0046(6) 0.0054(6) 
C118 0.0402(11) 0.0257(9) 0.0244(9) 0.0129(8) 0.0038(8) 0.0076(8) 
C119 0.0243(8) 0.0286(9) 0.0160(8) 0.0095(7) 0.0000(6) 0.0071(7) 
C120 0.0219(8) 0.0279(9) 0.0158(8) 0.0033(7) -0.0016(6) 0.0007(7) 
C121 0.0383(11) 0.0354(11) 0.0210(9) 0.0027(8) -0.0107(8) -0.0031(9) 
C122 0.0230(8) 0.0185(8) 0.0174(8) 0.0053(6) 0.0001(6) 0.0009(6) 
C123 0.0159(7) 0.0189(8) 0.0205(8) 0.0073(6) -0.0003(6) -0.0002(6) 
C124 0.0185(8) 0.0303(10) 0.0291(9) 0.0128(8) -0.0038(7) -0.0030(7) 
C125 0.0209(8) 0.0303(10) 0.0256(9) 0.0109(8) 0.0044(7) 0.0000(7) 
C126 0.0189(8) 0.0145(7) 0.0208(8) 0.0037(6) 0.0015(6) 0.0017(6) 
C127 0.0233(8) 0.0219(9) 0.0296(9) 0.0083(7) 0.0022(7) 0.0076(7) 
C128 0.0310(9) 0.0210(9) 0.0216(9) -0.0002(7) 0.0013(7) 0.0023(7) 
C129 0.0147(7) 0.0212(8) 0.0224(8) 0.0059(7) 0.0008(6) 0.0014(6) 
C130 0.0226(8) 0.0218(8) 0.0207(8) 0.0061(7) -0.0004(6) 0.0037(7) 
C131 0.0274(9) 0.0336(10) 0.0177(8) 0.0068(7) 0.0002(7) 0.0137(8) 
C132 0.0492(13) 0.0399(12) 0.0259(10) 0.0050(9) 0.0051(9) 0.0250(10) 
C133 0.0195(8) 0.0475(12) 0.0209(9) 0.0122(8) 0.0027(7) 0.0104(8) 
C134 0.0158(8) 0.0381(11) 0.0300(10) 0.0136(8) 0.0024(7) -0.0009(7) 
C135 0.0234(10) 0.0544(14) 0.0546(14) 0.0255(12) 0.0095(9) -0.0049(9) 
C136 0.0196(8) 0.0207(8) 0.0336(10) 0.0070(7) 0.0041(7) -0.0001(7) 
C137 0.0172(7) 0.0156(8) 0.0269(9) 0.0049(7) -0.0006(6) -0.0033(6) 
C138 0.0507(13) 0.0233(10) 0.0269(10) -0.0021(8) 0.0037(9) -0.0112(9) 
C139 0.0212(8) 0.0193(8) 0.0325(10) 0.0105(7) 0.0021(7) 0.0001(7) 
C143 0.0487(12) 0.0263(10) 0.0211(9) 0.0028(8) 0.0059(8) 0.0003(9) 
C144 0.0331(10) 0.0384(11) 0.0192(9) 0.0027(8) 0.0032(7) 0.0013(8) 
C145 0.0269(9) 0.0398(11) 0.0218(9) 0.0144(8) 0.0042(7) 0.0019(8) 
C146 0.0338(10) 0.0252(9) 0.0210(9) 0.0105(7) 0.0035(7) -0.0023(7) 

_refine_ls_extinction_method 
    'None'
_oxford_refine_ls_scale 0.091383(9) 
loop_
 _geom_bond_atom_site_label_1
 _geom_bond_site_symmetry_1
 _geom_bond_atom_site_label_2
 _geom_bond_site_symmetry_2
 _geom_bond_distance
 _geom_bond_publ_flag
Co1 . Ti1 . 2.2371(3)    yes
Co1 . P1 . 2.2193(5)    yes
Co1 . P2 . 2.2178(5)    yes
Co1 . P3 . 2.2081(4)    yes
Co1 . N4 . 1.8713(15)    yes
Co101 . Ti101 . 2.2268(3)    yes
Co101 . P101 . 2.2092(5)    yes
Co101 . P102 . 2.2172(4)    yes
Co101 . P103 . 2.2145(5)    yes
Co101 . N104 . 1.8765(15)    yes
Ti1 . P1 . 2.6714(5)    yes
Ti1 . P2 . 2.6730(5)    yes
Ti1 . P3 . 2.7044(5)    yes
Ti1 . O1 . 2.2897(11)    yes
Ti1 . N1 . 1.9877(13)    yes
Ti1 . N2 . 1.9928(13)    yes
Ti1 . N3 . 1.9980(13)    yes
Ti101 . P101 . 2.6381(5)    yes
Ti101 . P102 . 2.7215(5)    yes
Ti101 . P103 . 2.6903(5)    yes
Ti101 . O101 . 2.2764(12)    yes
Ti101 . N101 . 1.9693(13)    yes
Ti101 . N102 . 2.0133(13)    yes
Ti101 . N103 . 2.0145(14)    yes
P1 . N1 . 1.6982(13)    yes
P1 . C9 . 1.8621(17)    yes
P1 . C12 . 1.8740(16)    yes
P2 . N2 . 1.6864(13)    yes
P2 . C23 . 1.8636(17)    yes
P2 . C26 . 1.8618(17)    yes
P3 . N3 . 1.6862(13)    yes
P3 . C37 . 1.8612(17)    yes
P3 . C40 . 1.8708(17)    yes
P101 . N101 . 1.6953(14)    yes
P101 . C109 . 1.8604(17)    yes
P101 . C112 . 1.8668(17)    yes
P102 . N102 . 1.6868(14)    yes
P102 . C123 . 1.8650(16)    yes
P102 . C126 . 1.8737(16)    yes
P103 . N103 . 1.6799(15)    yes
P103 . C137 . 1.8686(17)    yes
P103 . C241 . 1.900(4)    yes
P103 . N103 . 1.6799(15)    yes
P103 . C137 . 1.8686(17)    yes
P103 . C244 . 1.864(4)    yes
O1 . C43 . 1.444(2)    yes
O1 . C46 . 1.451(2)    yes
O2 . C48 . 1.355(4)    yes
O2 . C49 . 1.364(5)    yes
O3 . C52 . 1.417(3)    yes
O3 . C53 . 1.414(3)    yes
O101 . C143 . 1.438(2)    yes
O101 . C146 . 1.444(2)    yes
N1 . C1 . 1.413(2)    yes
N2 . C15 . 1.4141(19)    yes
N3 . C29 . 1.4119(19)    yes
N4 . N5 . 1.052(2)    yes
N101 . C101 . 1.412(2)    yes
N102 . C115 . 1.4136(19)    yes
N103 . C129 . 1.409(2)    yes
N104 . N105 . 1.069(2)    yes
C1 . C2 . 1.393(2)    yes
C1 . C8 . 1.399(2)    yes
C2 . C3 . 1.391(2)    yes
C2 . H21 . 0.925    no
C3 . C4 . 1.502(3)    yes
C3 . C5 . 1.390(3)    yes
C4 . H41 . 0.948    no
C4 . H42 . 0.949    no
C4 . H43 . 0.928    no
C5 . C6 . 1.384(3)    yes
C5 . H51 . 0.941    no
C6 . C7 . 1.514(3)    yes
C6 . C8 . 1.395(2)    yes
C7 . H71 . 0.953    no
C7 . H72 . 0.944    no
C7 . H73 . 0.951    no
C8 . H81 . 0.941    no
C9 . C10 . 1.521(2)    yes
C9 . C11 . 1.529(2)    yes
C9 . H91 . 0.984    no
C10 . H101 . 0.964    no
C10 . H102 . 0.959    no
C10 . H103 . 0.964    no
C11 . H111 . 0.964    no
C11 . H112 . 0.961    no
C11 . H113 . 0.953    no
C12 . C13 . 1.531(2)    yes
C12 . C14 . 1.531(2)    yes
C12 . H121 . 0.969    no
C13 . H131 . 0.954    no
C13 . H132 . 0.965    no
C13 . H133 . 0.971    no
C14 . H141 . 0.970    no
C14 . H142 . 0.964    no
C14 . H143 . 0.956    no
C15 . C16 . 1.399(2)    yes
C15 . C22 . 1.397(2)    yes
C16 . C17 . 1.390(2)    yes
C16 . H161 . 0.945    no
C17 . C18 . 1.509(2)    yes
C17 . C19 . 1.388(2)    yes
C18 . H181 . 0.936    no
C18 . H182 . 0.934    no
C18 . H183 . 0.936    no
C19 . C20 . 1.391(3)    yes
C19 . H191 . 0.939    no
C20 . C21 . 1.509(3)    yes
C20 . C22 . 1.390(2)    yes
C21 . H211 . 0.932    no
C21 . H212 . 0.927    no
C21 . H213 . 0.922    no
C22 . H221 . 0.936    no
C23 . C24 . 1.531(2)    yes
C23 . C25 . 1.531(2)    yes
C23 . H231 . 0.966    no
C24 . H241 . 0.974    no
C24 . H242 . 0.961    no
C24 . H243 . 0.959    no
C25 . H251 . 0.970    no
C25 . H252 . 0.978    no
C25 . H253 . 0.971    no
C26 . C27 . 1.530(2)    yes
C26 . C28 . 1.530(2)    yes
C26 . H261 . 0.959    no
C27 . H271 . 0.964    no
C27 . H272 . 0.983    no
C27 . H273 . 0.961    no
C28 . H281 . 0.977    no
C28 . H282 . 0.978    no
C28 . H283 . 0.966    no
C29 . C30 . 1.391(2)    yes
C29 . C36 . 1.394(2)    yes
C30 . C31 . 1.390(2)    yes
C30 . H301 . 0.934    no
C31 . C32 . 1.505(3)    yes
C31 . C33 . 1.390(2)    yes
C32 . H321 . 0.945    no
C32 . H322 . 0.936    no
C32 . H323 . 0.959    no
C33 . C34 . 1.390(2)    yes
C33 . H331 . 0.928    no
C34 . C35 . 1.505(2)    yes
C34 . C36 . 1.393(2)    yes
C35 . H351 . 0.946    no
C35 . H352 . 0.941    no
C35 . H353 . 0.946    no
C36 . H361 . 0.946    no
C37 . C38 . 1.533(2)    yes
C37 . C39 . 1.525(2)    yes
C37 . H371 . 0.980    no
C38 . H381 . 0.959    no
C38 . H382 . 0.961    no
C38 . H383 . 0.944    no
C39 . H391 . 0.968    no
C39 . H392 . 0.957    no
C39 . H393 . 0.955    no
C40 . C41 . 1.527(2)    yes
C40 . C42 . 1.530(2)    yes
C40 . H401 . 0.981    no
C41 . H411 . 0.956    no
C41 . H412 . 0.964    no
C41 . H413 . 0.946    no
C42 . H421 . 0.968    no
C42 . H422 . 0.969    no
C42 . H423 . 0.978    no
C43 . C44 . 1.515(3)    yes
C43 . H431 . 0.981    no
C43 . H432 . 0.959    no
C44 . C45 . 1.509(3)    yes
C44 . H441 . 0.995    no
C44 . H442 . 0.954    no
C45 . C46 . 1.500(2)    yes
C45 . H451 . 0.992    no
C45 . H452 . 1.021    no
C46 . H461 . 0.992    no
C46 . H462 . 0.965    no
C47 . C48 . 1.392(5)    yes
C47 . H471 . 0.949    no
C47 . H472 . 0.962    no
C47 . H473 . 0.951    no
C48 . H481 . 0.971    no
C48 . H482 . 0.974    no
C49 . C50 . 1.398(5)    yes
C49 . H491 . 0.969    no
C49 . H492 . 0.970    no
C50 . H501 . 0.964    no
C50 . H502 . 0.955    no
C50 . H503 . 0.965    no
C51 . C52 . 1.495(4)    yes
C51 . H511 . 0.959    no
C51 . H512 . 0.974    no
C51 . H513 . 0.968    no
C52 . H521 . 0.979    no
C52 . H522 . 0.984    no
C53 . C54 . 1.499(4)    yes
C53 . H531 . 0.971    no
C53 . H532 . 0.976    no
C54 . H541 . 0.984    no
C54 . H542 . 0.977    no
C54 . H543 . 0.981    no
C101 . C102 . 1.392(2)    yes
C101 . C108 . 1.398(2)    yes
C102 . C103 . 1.390(3)    yes
C102 . H1021 . 0.930    no
C103 . C104 . 1.507(3)    yes
C103 . C105 . 1.390(3)    yes
C104 . H1041 . 0.938    no
C104 . H1042 . 0.940    no
C104 . H1043 . 0.943    no
C105 . C106 . 1.392(3)    yes
C105 . H1051 . 0.957    no
C106 . C107 . 1.515(3)    yes
C106 . C108 . 1.385(3)    yes
C107 . H1071 . 0.958    no
C107 . H1072 . 0.957    no
C107 . H1073 . 0.940    no
C108 . H1081 . 0.938    no
C109 . C110 . 1.516(3)    yes
C109 . C211 . 1.649(6)    yes
C109 . H1091 . 0.968    no
C109 . C110 . 1.516(3)    yes
C109 . C212 . 1.444(4)    yes
C109 . H1092 . 0.970    no
C110 . H1101 . 0.941    no
C110 . H1102 . 0.940    no
C110 . H1103 . 0.936    no
C112 . C113 . 1.539(2)    yes
C112 . C114 . 1.524(3)    yes
C112 . H1121 . 0.969    no
C113 . H1131 . 0.971    no
C113 . H1132 . 0.952    no
C113 . H1133 . 0.979    no
C114 . H1141 . 0.964    no
C114 . H1142 . 0.966    no
C114 . H1143 . 0.971    no
C115 . C116 . 1.395(2)    yes
C115 . C122 . 1.400(2)    yes
C116 . C117 . 1.392(2)    yes
C116 . H1161 . 0.937    no
C117 . C118 . 1.507(2)    yes
C117 . C119 . 1.388(2)    yes
C118 . H1181 . 0.955    no
C118 . H1182 . 0.945    no
C118 . H1183 . 0.929    no
C119 . C120 . 1.392(3)    yes
C119 . H1191 . 0.941    no
C120 . C121 . 1.507(2)    yes
C120 . C122 . 1.387(2)    yes
C121 . H1211 . 0.952    no
C121 . H1212 . 0.944    no
C121 . H1213 . 0.945    no
C122 . H1221 . 0.959    no
C123 . C124 . 1.527(2)    yes
C123 . C125 . 1.529(2)    yes
C123 . H1231 . 0.967    no
C124 . H1241 . 0.968    no
C124 . H1242 . 0.945    no
C124 . H1243 . 0.950    no
C125 . H1251 . 0.968    no
C125 . H1252 . 0.960    no
C125 . H1253 . 0.973    no
C126 . C127 . 1.531(2)    yes
C126 . C128 . 1.534(2)    yes
C126 . H1261 . 0.972    no
C127 . H1271 . 0.964    no
C127 . H1272 . 0.952    no
C127 . H1273 . 0.952    no
C128 . H1281 . 0.952    no
C128 . H1282 . 0.954    no
C128 . H1283 . 0.965    no
C129 . C130 . 1.395(2)    yes
C129 . C136 . 1.397(2)    yes
C130 . C131 . 1.390(2)    yes
C130 . H1301 . 0.938    no
C131 . C132 . 1.508(3)    yes
C131 . C133 . 1.391(3)    yes
C132 . H1321 . 0.964    no
C132 . H1322 . 0.953    no
C132 . H1323 . 0.957    no
C133 . C134 . 1.384(3)    yes
C133 . H1331 . 0.935    no
C134 . C135 . 1.504(3)    yes
C134 . C136 . 1.392(2)    yes
C135 . H1351 . 0.926    no
C135 . H1352 . 0.962    no
C135 . H1353 . 0.939    no
C136 . H1361 . 0.933    no
C137 . C138 . 1.524(3)    yes
C137 . C139 . 1.525(2)    yes
C137 . H1371 . 0.978    no
C138 . H1381 . 0.978    no
C138 . H1382 . 0.980    no
C138 . H1383 . 0.951    no
C139 . H1391 . 0.958    no
C139 . H1392 . 0.950    no
C139 . H1393 . 0.973    no
C143 . C144 . 1.521(3)    yes
C143 . H1431 . 0.987    no
C143 . H1432 . 0.967    no
C144 . C145 . 1.541(3)    yes
C144 . H1441 . 0.962    no
C144 . H1442 . 0.973    no
C145 . C146 . 1.513(2)    yes
C145 . H1451 . 0.982    no
C145 . H1452 . 0.977    no
C146 . H1461 . 0.977    no
C146 . H1462 . 0.965    no
C211 . H2111 . 0.946    no
C211 . H2112 . 0.965    no
C211 . H2113 . 0.956    no
C212 . H2121 . 0.945    no
C212 . H2122 . 0.970    no
C212 . H2123 . 0.981    no
C240 . C241 . 1.510(6)    yes
C240 . H2401 . 0.977    no
C240 . H2402 . 0.946    no
C240 . H2403 . 0.966    no
C241 . C242 . 1.542(6)    yes
C241 . H2411 . 0.970    no
C242 . H2421 . 0.970    no
C242 . H2422 . 0.963    no
C242 . H2423 . 0.970    no
C243 . C244 . 1.536(6)    yes
C243 . H2431 . 0.965    no
C243 . H2432 . 0.960    no
C243 . H2433 . 0.974    no
C244 . C245 . 1.520(6)    yes
C244 . H2441 . 0.968    no
C245 . H2451 . 0.982    no
C245 . H2452 . 0.966    no
C245 . H2453 . 0.954    no
loop_
 _geom_angle_atom_site_label_1
 _geom_angle_site_symmetry_1
 _geom_angle_atom_site_label_2
 _geom_angle_site_symmetry_2
 _geom_angle_atom_site_label_3
 _geom_angle_site_symmetry_3
 _geom_angle
 _geom_angle_publ_flag
Ti1 . Co1 . P1 . 73.659(14)    yes
Ti1 . Co1 . P2 . 73.739(14)    yes
P1 . Co1 . P2 . 109.234(17)    yes
Ti1 . Co1 . P3 . 74.942(14)    yes
P1 . Co1 . P3 . 114.553(17)    yes
P2 . Co1 . P3 . 114.631(17)    yes
Ti1 . Co1 . N4 . 177.79(5)    yes
P1 . Co1 . N4 . 106.78(5)    yes
P2 . Co1 . N4 . 107.99(5)    yes
P3 . Co1 . N4 . 102.98(5)    yes
Ti101 . Co101 . P101 . 72.982(14)    yes
Ti101 . Co101 . P102 . 75.526(14)    yes
P101 . Co101 . P102 . 109.961(17)    yes
Ti101 . Co101 . P103 . 74.566(15)    yes
P101 . Co101 . P103 . 113.674(18)    yes
P102 . Co101 . P103 . 115.399(17)    yes
Ti101 . Co101 . N104 . 177.85(5)    yes
P101 . Co101 . N104 . 104.95(5)    yes
P102 . Co101 . N104 . 105.92(5)    yes
P103 . Co101 . N104 . 106.00(5)    yes
Co1 . Ti1 . P1 . 52.865(12)    yes
Co1 . Ti1 . P2 . 52.798(11)    yes
P1 . Ti1 . P2 . 85.202(15)    yes
Co1 . Ti1 . P3 . 52.041(11)    yes
P1 . Ti1 . P3 . 87.714(14)    yes
P2 . Ti1 . P3 . 87.691(15)    yes
Co1 . Ti1 . O1 . 176.08(3)    yes
P1 . Ti1 . O1 . 129.53(3)    yes
P2 . Ti1 . O1 . 128.76(3)    yes
P3 . Ti1 . O1 . 124.07(3)    yes
Co1 . Ti1 . N1 . 92.26(4)    yes
P1 . Ti1 . N1 . 39.42(4)    yes
P2 . Ti1 . N1 . 110.91(4)    yes
P3 . Ti1 . N1 . 117.25(4)    yes
O1 . Ti1 . N1 . 90.28(5)    yes
Co1 . Ti1 . N2 . 91.82(4)    yes
P1 . Ti1 . N2 . 113.34(4)    yes
P2 . Ti1 . N2 . 39.06(4)    yes
P3 . Ti1 . N2 . 114.37(4)    yes
O1 . Ti1 . N2 . 89.71(5)    yes
Co1 . Ti1 . N3 . 90.49(4)    yes
P1 . Ti1 . N3 . 114.45(4)    yes
P2 . Ti1 . N3 . 115.92(4)    yes
P3 . Ti1 . N3 . 38.46(4)    yes
O1 . Ti1 . N3 . 85.63(5)    yes
N1 . Ti1 . N2 . 116.56(6)    yes
N1 . Ti1 . N3 . 122.36(6)    yes
N2 . Ti1 . N3 . 120.87(6)    yes
Co101 . Ti101 . P101 . 53.200(12)    yes
Co101 . Ti101 . P102 . 52.076(11)    yes
P101 . Ti101 . P102 . 85.103(15)    yes
Co101 . Ti101 . P103 . 52.508(12)    yes
P101 . Ti101 . P103 . 88.044(15)    yes
P102 . Ti101 . P103 . 87.601(15)    yes
Co101 . Ti101 . O101 . 172.62(3)    yes
P101 . Ti101 . O101 . 134.02(3)    yes
P102 . Ti101 . O101 . 125.66(3)    yes
P103 . Ti101 . O101 . 122.31(3)    yes
Co101 . Ti101 . N101 . 92.97(4)    yes
P101 . Ti101 . N101 . 39.96(4)    yes
P102 . Ti101 . N101 . 109.33(4)    yes
P103 . Ti101 . N101 . 119.53(4)    yes
O101 . Ti101 . N101 . 94.36(5)    yes
Co101 . Ti101 . N102 . 89.95(4)    yes
P101 . Ti101 . N102 . 114.91(4)    yes
P102 . Ti101 . N102 . 38.18(4)    yes
P103 . Ti101 . N102 . 111.00(4)    yes
O101 . Ti101 . N102 . 87.48(5)    yes
Co101 . Ti101 . N103 . 90.34(4)    yes
P101 . Ti101 . N103 . 108.59(4)    yes
P102 . Ti101 . N103 . 120.86(4)    yes
P103 . Ti101 . N103 . 38.58(4)    yes
O101 . Ti101 . N103 . 85.48(5)    yes
N101 . Ti101 . N102 . 117.46(6)    yes
N101 . Ti101 . N103 . 117.39(6)    yes
N102 . Ti101 . N103 . 125.04(6)    yes
Ti1 . P1 . Co1 . 53.476(11)    yes
Ti1 . P1 . N1 . 48.02(5)    yes
Co1 . P1 . N1 . 101.46(5)    yes
Ti1 . P1 . C9 . 130.32(5)    yes
Co1 . P1 . C9 . 127.88(6)    yes
N1 . P1 . C9 . 104.12(7)    yes
Ti1 . P1 . C12 . 124.80(5)    yes
Co1 . P1 . C12 . 115.99(6)    yes
N1 . P1 . C12 . 105.35(7)    yes
C9 . P1 . C12 . 99.79(7)    yes
Ti1 . P2 . Co1 . 53.463(12)    yes
Ti1 . P2 . N2 . 48.13(5)    yes
Co1 . P2 . N2 . 101.54(5)    yes
Ti1 . P2 . C23 . 122.89(6)    yes
Co1 . P2 . C23 . 115.91(6)    yes
N2 . P2 . C23 . 106.89(7)    yes
Ti1 . P2 . C26 . 129.21(6)    yes
Co1 . P2 . C26 . 118.59(6)    yes
N2 . P2 . C26 . 107.27(7)    yes
C23 . P2 . C26 . 105.74(8)    yes
Ti1 . P3 . Co1 . 53.017(11)    yes
Ti1 . P3 . N3 . 47.47(5)    yes
Co1 . P3 . N3 . 100.47(5)    yes
Ti1 . P3 . C37 . 129.48(5)    yes
Co1 . P3 . C37 . 125.37(6)    yes
N3 . P3 . C37 . 105.28(7)    yes
Ti1 . P3 . C40 . 124.78(6)    yes
Co1 . P3 . C40 . 116.47(5)    yes
N3 . P3 . C40 . 105.94(7)    yes
C37 . P3 . C40 . 101.50(7)    yes
Ti101 . P101 . Co101 . 53.817(12)    yes
Ti101 . P101 . N101 . 48.26(5)    yes
Co101 . P101 . N101 . 101.84(5)    yes
Ti101 . P101 . C109 . 125.23(6)    yes
Co101 . P101 . C109 . 123.24(7)    yes
N101 . P101 . C109 . 105.10(8)    yes
Ti101 . P101 . C112 . 128.61(6)    yes
Co101 . P101 . C112 . 117.94(6)    yes
N101 . P101 . C112 . 104.88(7)    yes
C109 . P101 . C112 . 101.90(8)    yes
Ti101 . P102 . Co101 . 52.398(12)    yes
Ti101 . P102 . N102 . 47.54(4)    yes
Co101 . P102 . N102 . 99.57(5)    yes
Ti101 . P102 . C123 . 119.21(6)    yes
Co101 . P102 . C123 . 116.02(5)    yes
N102 . P102 . C123 . 106.95(7)    yes
Ti101 . P102 . C126 . 134.08(6)    yes
Co101 . P102 . C126 . 118.80(5)    yes
N102 . P102 . C126 . 109.87(7)    yes
C123 . P102 . C126 . 104.98(8)    yes
Ti101 . P103 . Co101 . 52.927(12)    yes
Ti101 . P103 . N103 . 48.40(5)    yes
Co101 . P103 . N103 . 100.41(5)    yes
Ti101 . P103 . C137 . 120.63(5)    yes
Co101 . P103 . C137 . 121.91(6)    yes
N103 . P103 . C137 . 105.95(8)    yes
Ti101 . P103 . C241 . 135.83(12)    yes
Co101 . P103 . C241 . 112.20(13)    yes
N103 . P103 . C241 . 114.09(15)    yes
C137 . P103 . C241 . 102.61(13)    yes
Ti101 . P103 . Co101 . 52.927(12)    yes
Ti101 . P103 . N103 . 48.40(5)    yes
Co101 . P103 . N103 . 100.41(5)    yes
Ti101 . P103 . C137 . 120.63(5)    yes
Co101 . P103 . C137 . 121.91(6)    yes
N103 . P103 . C137 . 105.95(8)    yes
Ti101 . P103 . C244 . 131.17(13)    yes
Co101 . P103 . C244 . 120.14(13)    yes
N103 . P103 . C244 . 102.42(16)    yes
C137 . P103 . C244 . 103.39(13)    yes
Ti1 . O1 . C43 . 128.58(12)    yes
Ti1 . O1 . C46 . 121.07(10)    yes
C43 . O1 . C46 . 108.71(13)    yes
C48 . O2 . C49 . 119.5(3)    yes
C52 . O3 . C53 . 113.67(19)    yes
Ti101 . O101 . C143 . 134.48(11)    yes
Ti101 . O101 . C146 . 119.97(10)    yes
C143 . O101 . C146 . 105.11(13)    yes
P1 . N1 . Ti1 . 92.56(6)    yes
P1 . N1 . C1 . 123.69(10)    yes
Ti1 . N1 . C1 . 135.53(10)    yes
P2 . N2 . Ti1 . 92.81(6)    yes
P2 . N2 . C15 . 132.70(11)    yes
Ti1 . N2 . C15 . 132.47(10)    yes
P3 . N3 . Ti1 . 94.07(6)    yes
P3 . N3 . C29 . 124.74(11)    yes
Ti1 . N3 . C29 . 135.19(10)    yes
Co1 . N4 . N5 . 175.89(15)    yes
P101 . N101 . Ti101 . 91.78(6)    yes
P101 . N101 . C101 . 125.44(11)    yes
Ti101 . N101 . C101 . 140.60(11)    yes
P102 . N102 . Ti101 . 94.29(6)    yes
P102 . N102 . C115 . 131.35(11)    yes
Ti101 . N102 . C115 . 134.33(11)    yes
P103 . N103 . Ti101 . 93.03(7)    yes
P103 . N103 . C129 . 129.57(12)    yes
Ti101 . N103 . C129 . 136.74(11)    yes
Co101 . N104 . N105 . 178.52(16)    yes
N1 . C1 . C2 . 119.80(15)    yes
N1 . C1 . C8 . 121.68(15)    yes
C2 . C1 . C8 . 118.52(15)    yes
C1 . C2 . C3 . 121.66(17)    yes
C1 . C2 . H21 . 119.0    no
C3 . C2 . H21 . 119.3    no
C2 . C3 . C4 . 120.82(19)    yes
C2 . C3 . C5 . 118.33(17)    yes
C4 . C3 . C5 . 120.85(18)    yes
C3 . C4 . H41 . 108.9    no
C3 . C4 . H42 . 112.0    no
H41 . C4 . H42 . 107.2    no
C3 . C4 . H43 . 111.5    no
H41 . C4 . H43 . 107.8    no
H42 . C4 . H43 . 109.2    no
C3 . C5 . C6 . 121.72(17)    yes
C3 . C5 . H51 . 119.3    no
C6 . C5 . H51 . 119.0    no
C5 . C6 . C7 . 120.61(17)    yes
C5 . C6 . C8 . 118.96(17)    yes
C7 . C6 . C8 . 120.44(18)    yes
C6 . C7 . H71 . 112.5    no
C6 . C7 . H72 . 110.0    no
H71 . C7 . H72 . 106.4    no
C6 . C7 . H73 . 111.6    no
H71 . C7 . H73 . 108.1    no
H72 . C7 . H73 . 108.1    no
C1 . C8 . C6 . 120.80(17)    yes
C1 . C8 . H81 . 120.0    no
C6 . C8 . H81 . 119.2    no
P1 . C9 . C10 . 114.44(11)    yes
P1 . C9 . C11 . 112.00(13)    yes
C10 . C9 . C11 . 110.81(14)    yes
P1 . C9 . H91 . 102.8    no
C10 . C9 . H91 . 107.2    no
C11 . C9 . H91 . 109.0    no
C9 . C10 . H101 . 111.3    no
C9 . C10 . H102 . 108.5    no
H101 . C10 . H102 . 110.2    no
C9 . C10 . H103 . 108.8    no
H101 . C10 . H103 . 109.3    no
H102 . C10 . H103 . 108.7    no
C9 . C11 . H111 . 111.9    no
C9 . C11 . H112 . 110.9    no
H111 . C11 . H112 . 107.8    no
C9 . C11 . H113 . 113.3    no
H111 . C11 . H113 . 107.3    no
H112 . C11 . H113 . 105.1    no
P1 . C12 . C13 . 117.84(12)    yes
P1 . C12 . C14 . 112.06(12)    yes
C13 . C12 . C14 . 109.71(13)    yes
P1 . C12 . H121 . 102.8    no
C13 . C12 . H121 . 107.0    no
C14 . C12 . H121 . 106.4    no
C12 . C13 . H131 . 112.5    no
C12 . C13 . H132 . 108.9    no
H131 . C13 . H132 . 108.9    no
C12 . C13 . H133 . 108.1    no
H131 . C13 . H133 . 108.9    no
H132 . C13 . H133 . 109.4    no
C12 . C14 . H141 . 109.6    no
C12 . C14 . H142 . 109.9    no
H141 . C14 . H142 . 107.9    no
C12 . C14 . H143 . 110.4    no
H141 . C14 . H143 . 110.1    no
H142 . C14 . H143 . 109.0    no
N2 . C15 . C16 . 121.87(14)    yes
N2 . C15 . C22 . 119.87(14)    yes
C16 . C15 . C22 . 117.98(14)    yes
C15 . C16 . C17 . 121.40(15)    yes
C15 . C16 . H161 . 119.2    no
C17 . C16 . H161 . 119.3    no
C16 . C17 . C18 . 120.69(16)    yes
C16 . C17 . C19 . 119.21(16)    yes
C18 . C17 . C19 . 120.09(15)    yes
C17 . C18 . H181 . 111.2    no
C17 . C18 . H182 . 112.3    no
H181 . C18 . H182 . 107.9    no
C17 . C18 . H183 . 110.7    no
H181 . C18 . H183 . 107.6    no
H182 . C18 . H183 . 106.9    no
C17 . C19 . C20 . 120.81(15)    yes
C17 . C19 . H191 . 118.1    no
C20 . C19 . H191 . 121.1    no
C19 . C20 . C21 . 120.72(16)    yes
C19 . C20 . C22 . 119.13(16)    yes
C21 . C20 . C22 . 120.15(17)    yes
C20 . C21 . H211 . 110.2    no
C20 . C21 . H212 . 111.5    no
H211 . C21 . H212 . 108.4    no
C20 . C21 . H213 . 111.0    no
H211 . C21 . H213 . 106.7    no
H212 . C21 . H213 . 108.8    no
C15 . C22 . C20 . 121.47(16)    yes
C15 . C22 . H221 . 118.9    no
C20 . C22 . H221 . 119.6    no
P2 . C23 . C24 . 118.90(12)    yes
P2 . C23 . C25 . 111.13(12)    yes
C24 . C23 . C25 . 111.32(14)    yes
P2 . C23 . H231 . 102.7    no
C24 . C23 . H231 . 104.9    no
C25 . C23 . H231 . 106.5    no
C23 . C24 . H241 . 108.3    no
C23 . C24 . H242 . 111.2    no
H241 . C24 . H242 . 108.1    no
C23 . C24 . H243 . 111.1    no
H241 . C24 . H243 . 108.2    no
H242 . C24 . H243 . 109.8    no
C23 . C25 . H251 . 109.5    no
C23 . C25 . H252 . 110.9    no
H251 . C25 . H252 . 108.7    no
C23 . C25 . H253 . 110.4    no
H251 . C25 . H253 . 108.6    no
H252 . C25 . H253 . 108.7    no
P2 . C26 . C27 . 116.80(12)    yes
P2 . C26 . C28 . 112.68(12)    yes
C27 . C26 . C28 . 110.97(14)    yes
P2 . C26 . H261 . 102.6    no
C27 . C26 . H261 . 106.7    no
C28 . C26 . H261 . 105.9    no
C26 . C27 . H271 . 109.0    no
C26 . C27 . H272 . 110.3    no
H271 . C27 . H272 . 108.7    no
C26 . C27 . H273 . 110.8    no
H271 . C27 . H273 . 107.9    no
H272 . C27 . H273 . 110.0    no
C26 . C28 . H281 . 110.8    no
C26 . C28 . H282 . 108.5    no
H281 . C28 . H282 . 108.0    no
C26 . C28 . H283 . 111.1    no
H281 . C28 . H283 . 110.2    no
H282 . C28 . H283 . 108.2    no
N3 . C29 . C30 . 119.19(14)    yes
N3 . C29 . C36 . 122.08(14)    yes
C30 . C29 . C36 . 118.73(14)    yes
C29 . C30 . C31 . 121.28(15)    yes
C29 . C30 . H301 . 119.3    no
C31 . C30 . H301 . 119.4    no
C30 . C31 . C32 . 119.47(17)    yes
C30 . C31 . C33 . 118.88(16)    yes
C32 . C31 . C33 . 121.65(16)    yes
C31 . C32 . H321 . 112.2    no
C31 . C32 . H322 . 110.3    no
H321 . C32 . H322 . 107.5    no
C31 . C32 . H323 . 111.2    no
H321 . C32 . H323 . 109.4    no
H322 . C32 . H323 . 106.0    no
C31 . C33 . C34 . 121.17(15)    yes
C31 . C33 . H331 . 119.9    no
C34 . C33 . H331 . 118.9    no
C33 . C34 . C35 . 120.34(15)    yes
C33 . C34 . C36 . 118.92(15)    yes
C35 . C34 . C36 . 120.73(15)    yes
C34 . C35 . H351 . 112.3    no
C34 . C35 . H352 . 113.1    no
H351 . C35 . H352 . 105.0    no
C34 . C35 . H353 . 113.0    no
H351 . C35 . H353 . 105.4    no
H352 . C35 . H353 . 107.3    no
C29 . C36 . C34 . 121.01(15)    yes
C29 . C36 . H361 . 119.3    no
C34 . C36 . H361 . 119.7    no
P3 . C37 . C38 . 111.20(12)    yes
P3 . C37 . C39 . 113.13(11)    yes
C38 . C37 . C39 . 110.80(14)    yes
P3 . C37 . H371 . 105.4    no
C38 . C37 . H371 . 108.6    no
C39 . C37 . H371 . 107.3    no
C37 . C38 . H381 . 112.6    no
C37 . C38 . H382 . 111.0    no
H381 . C38 . H382 . 107.6    no
C37 . C38 . H383 . 110.3    no
H381 . C38 . H383 . 107.4    no
H382 . C38 . H383 . 107.7    no
C37 . C39 . H391 . 111.8    no
C37 . C39 . H392 . 111.4    no
H391 . C39 . H392 . 107.4    no
C37 . C39 . H393 . 109.7    no
H391 . C39 . H393 . 109.3    no
H392 . C39 . H393 . 107.0    no
P3 . C40 . C41 . 112.47(12)    yes
P3 . C40 . C42 . 117.45(12)    yes
C41 . C40 . C42 . 110.08(14)    yes
P3 . C40 . H401 . 101.0    no
C41 . C40 . H401 . 107.7    no
C42 . C40 . H401 . 107.2    no
C40 . C41 . H411 . 111.4    no
C40 . C41 . H412 . 111.4    no
H411 . C41 . H412 . 108.2    no
C40 . C41 . H413 . 109.8    no
H411 . C41 . H413 . 107.9    no
H412 . C41 . H413 . 108.0    no
C40 . C42 . H421 . 111.2    no
C40 . C42 . H422 . 111.1    no
H421 . C42 . H422 . 108.2    no
C40 . C42 . H423 . 108.2    no
H421 . C42 . H423 . 108.9    no
H422 . C42 . H423 . 109.3    no
O1 . C43 . C44 . 106.15(16)    yes
O1 . C43 . H431 . 107.9    no
C44 . C43 . H431 . 111.7    no
O1 . C43 . H432 . 110.1    no
C44 . C43 . H432 . 112.4    no
H431 . C43 . H432 . 108.5    no
C43 . C44 . C45 . 105.31(15)    yes
C43 . C44 . H441 . 111.4    no
C45 . C44 . H441 . 110.0    no
C43 . C44 . H442 . 107.3    no
C45 . C44 . H442 . 110.0    no
H441 . C44 . H442 . 112.6    no
C44 . C45 . C46 . 102.11(16)    yes
C44 . C45 . H451 . 110.3    no
C46 . C45 . H451 . 112.3    no
C44 . C45 . H452 . 111.0    no
C46 . C45 . H452 . 111.3    no
H451 . C45 . H452 . 109.6    no
C45 . C46 . O1 . 105.21(15)    yes
C45 . C46 . H461 . 111.5    no
O1 . C46 . H461 . 109.0    no
C45 . C46 . H462 . 112.0    no
O1 . C46 . H462 . 108.9    no
H461 . C46 . H462 . 110.0    no
C48 . C47 . H471 . 112.5    no
C48 . C47 . H472 . 106.2    no
H471 . C47 . H472 . 108.0    no
C48 . C47 . H473 . 113.7    no
H471 . C47 . H473 . 110.4    no
H472 . C47 . H473 . 105.6    no
C47 . C48 . O2 . 118.2(3)    yes
C47 . C48 . H481 . 112.7    no
O2 . C48 . H481 . 110.3    no
C47 . C48 . H482 . 104.1    no
O2 . C48 . H482 . 103.8    no
H481 . C48 . H482 . 106.5    no
O2 . C49 . C50 . 117.2(3)    yes
O2 . C49 . H491 . 100.9    no
C50 . C49 . H491 . 105.8    no
O2 . C49 . H492 . 111.5    no
C50 . C49 . H492 . 113.9    no
H491 . C49 . H492 . 105.8    no
C49 . C50 . H501 . 113.8    no
C49 . C50 . H502 . 113.3    no
H501 . C50 . H502 . 111.6    no
C49 . C50 . H503 . 105.0    no
H501 . C50 . H503 . 106.0    no
H502 . C50 . H503 . 106.4    no
C52 . C51 . H511 . 111.0    no
C52 . C51 . H512 . 109.5    no
H511 . C51 . H512 . 108.9    no
C52 . C51 . H513 . 108.9    no
H511 . C51 . H513 . 109.4    no
H512 . C51 . H513 . 109.1    no
C51 . C52 . O3 . 108.32(18)    yes
C51 . C52 . H521 . 111.8    no
O3 . C52 . H521 . 108.6    no
C51 . C52 . H522 . 111.7    no
O3 . C52 . H522 . 108.7    no
H521 . C52 . H522 . 107.6    no
O3 . C53 . C54 . 108.3(2)    yes
O3 . C53 . H531 . 109.0    no
C54 . C53 . H531 . 110.9    no
O3 . C53 . H532 . 110.3    no
C54 . C53 . H532 . 110.0    no
H531 . C53 . H532 . 108.3    no
C53 . C54 . H541 . 110.6    no
C53 . C54 . H542 . 108.2    no
H541 . C54 . H542 . 110.4    no
C53 . C54 . H543 . 108.8    no
H541 . C54 . H543 . 109.9    no
H542 . C54 . H543 . 108.9    no
N101 . C101 . C102 . 120.73(15)    yes
N101 . C101 . C108 . 120.82(15)    yes
C102 . C101 . C108 . 118.45(15)    yes
C101 . C102 . C103 . 121.40(17)    yes
C101 . C102 . H1021 . 119.1    no
C103 . C102 . H1021 . 119.5    no
C102 . C103 . C104 . 120.64(19)    yes
C102 . C103 . C105 . 118.64(17)    yes
C104 . C103 . C105 . 120.70(19)    yes
C103 . C104 . H1041 . 112.8    no
C103 . C104 . H1042 . 112.6    no
H1041 . C104 . H1042 . 105.7    no
C103 . C104 . H1043 . 113.1    no
H1041 . C104 . H1043 . 107.1    no
H1042 . C104 . H1043 . 105.0    no
C103 . C105 . C106 . 121.35(18)    yes
C103 . C105 . H1051 . 119.4    no
C106 . C105 . H1051 . 119.3    no
C105 . C106 . C107 . 121.00(19)    yes
C105 . C106 . C108 . 118.88(19)    yes
C107 . C106 . C108 . 120.1(2)    yes
C106 . C107 . H1071 . 112.3    no
C106 . C107 . H1072 . 110.9    no
H1071 . C107 . H1072 . 110.5    no
C106 . C107 . H1073 . 106.8    no
H1071 . C107 . H1073 . 107.9    no
H1072 . C107 . H1073 . 108.3    no
C101 . C108 . C106 . 121.24(17)    yes
C101 . C108 . H1081 . 119.3    no
C106 . C108 . H1081 . 119.4    no
P101 . C109 . C110 . 113.28(12)    yes
P101 . C109 . C211 . 106.2(2)    yes
C110 . C109 . C211 . 103.8(2)    yes
P101 . C109 . H1091 . 110.3    no
C110 . C109 . H1091 . 111.5    no
C211 . C109 . H1091 . 111.5    no
P101 . C109 . C110 . 113.28(12)    yes
P101 . C109 . C212 . 114.3(2)    yes
C110 . C109 . C212 . 115.8(2)    yes
P101 . C109 . H1092 . 102.9    no
C110 . C109 . H1092 . 104.9    no
C212 . C109 . H1092 . 103.8    no
C109 . C110 . H1101 . 110.8    no
C109 . C110 . H1102 . 114.6    no
H1101 . C110 . H1102 . 107.2    no
C109 . C110 . H1103 . 112.4    no
H1101 . C110 . H1103 . 103.3    no
H1102 . C110 . H1103 . 107.8    no
P101 . C112 . C113 . 117.31(12)    yes
P101 . C112 . C114 . 112.61(12)    yes
C113 . C112 . C114 . 110.38(14)    yes
P101 . C112 . H1121 . 101.9    no
C113 . C112 . H1121 . 106.4    no
C114 . C112 . H1121 . 107.2    no
C112 . C113 . H1131 . 107.8    no
C112 . C113 . H1132 . 112.6    no
H1131 . C113 . H1132 . 108.1    no
C112 . C113 . H1133 . 110.0    no
H1131 . C113 . H1133 . 107.3    no
H1132 . C113 . H1133 . 110.7    no
C112 . C114 . H1141 . 110.3    no
C112 . C114 . H1142 . 111.9    no
H1141 . C114 . H1142 . 109.5    no
C112 . C114 . H1143 . 109.7    no
H1141 . C114 . H1143 . 107.6    no
H1142 . C114 . H1143 . 107.6    no
N102 . C115 . C116 . 121.64(14)    yes
N102 . C115 . C122 . 120.30(14)    yes
C116 . C115 . C122 . 118.00(14)    yes
C115 . C116 . C117 . 121.46(15)    yes
C115 . C116 . H1161 . 118.8    no
C117 . C116 . H1161 . 119.8    no
C116 . C117 . C118 . 119.73(16)    yes
C116 . C117 . C119 . 119.15(15)    yes
C118 . C117 . C119 . 121.12(15)    yes
C117 . C118 . H1181 . 110.3    no
C117 . C118 . H1182 . 110.3    no
H1181 . C118 . H1182 . 108.0    no
C117 . C118 . H1183 . 110.5    no
H1181 . C118 . H1183 . 108.8    no
H1182 . C118 . H1183 . 108.9    no
C117 . C119 . C120 . 120.71(15)    yes
C117 . C119 . H1191 . 119.6    no
C120 . C119 . H1191 . 119.6    no
C119 . C120 . C121 . 120.28(16)    yes
C119 . C120 . C122 . 119.25(16)    yes
C121 . C120 . C122 . 120.47(17)    yes
C120 . C121 . H1211 . 110.7    no
C120 . C121 . H1212 . 112.0    no
H1211 . C121 . H1212 . 106.7    no
C120 . C121 . H1213 . 111.6    no
H1211 . C121 . H1213 . 107.8    no
H1212 . C121 . H1213 . 107.8    no
C115 . C122 . C120 . 121.37(16)    yes
C115 . C122 . H1221 . 119.0    no
C120 . C122 . H1221 . 119.6    no
P102 . C123 . C124 . 117.90(12)    yes
P102 . C123 . C125 . 111.88(12)    yes
C124 . C123 . C125 . 110.51(14)    yes
P102 . C123 . H1231 . 101.3    no
C124 . C123 . H1231 . 107.8    no
C125 . C123 . H1231 . 106.4    no
C123 . C124 . H1241 . 108.8    no
C123 . C124 . H1242 . 111.8    no
H1241 . C124 . H1242 . 107.0    no
C123 . C124 . H1243 . 111.8    no
H1241 . C124 . H1243 . 108.4    no
H1242 . C124 . H1243 . 108.8    no
C123 . C125 . H1251 . 108.5    no
C123 . C125 . H1252 . 112.0    no
H1251 . C125 . H1252 . 109.2    no
C123 . C125 . H1253 . 109.7    no
H1251 . C125 . H1253 . 109.8    no
H1252 . C125 . H1253 . 107.6    no
P102 . C126 . C127 . 118.38(12)    yes
P102 . C126 . C128 . 112.14(12)    yes
C127 . C126 . C128 . 108.91(14)    yes
P102 . C126 . H1261 . 103.1    no
C127 . C126 . H1261 . 106.8    no
C128 . C126 . H1261 . 106.6    no
C126 . C127 . H1271 . 110.3    no
C126 . C127 . H1272 . 108.3    no
H1271 . C127 . H1272 . 108.1    no
C126 . C127 . H1273 . 112.6    no
H1271 . C127 . H1273 . 108.9    no
H1272 . C127 . H1273 . 108.6    no
C126 . C128 . H1281 . 110.1    no
C126 . C128 . H1282 . 111.8    no
H1281 . C128 . H1282 . 109.0    no
C126 . C128 . H1283 . 109.3    no
H1281 . C128 . H1283 . 107.9    no
H1282 . C128 . H1283 . 108.7    no
N103 . C129 . C130 . 118.90(15)    yes
N103 . C129 . C136 . 123.31(15)    yes
C130 . C129 . C136 . 117.78(16)    yes
C129 . C130 . C131 . 121.57(17)    yes
C129 . C130 . H1301 . 118.8    no
C131 . C130 . H1301 . 119.6    no
C130 . C131 . C132 . 120.39(19)    yes
C130 . C131 . C133 . 119.17(17)    yes
C132 . C131 . C133 . 120.40(18)    yes
C131 . C132 . H1321 . 109.7    no
C131 . C132 . H1322 . 110.4    no
H1321 . C132 . H1322 . 108.4    no
C131 . C132 . H1323 . 111.8    no
H1321 . C132 . H1323 . 107.2    no
H1322 . C132 . H1323 . 109.2    no
C131 . C133 . C134 . 120.73(17)    yes
C131 . C133 . H1331 . 119.3    no
C134 . C133 . H1331 . 120.0    no
C133 . C134 . C135 . 120.70(18)    yes
C133 . C134 . C136 . 119.21(18)    yes
C135 . C134 . C136 . 120.09(19)    yes
C134 . C135 . H1351 . 110.7    no
C134 . C135 . H1352 . 110.7    no
H1351 . C135 . H1352 . 109.6    no
C134 . C135 . H1353 . 110.2    no
H1351 . C135 . H1353 . 108.4    no
H1352 . C135 . H1353 . 107.2    no
C129 . C136 . C134 . 121.52(17)    yes
C129 . C136 . H1361 . 119.8    no
C134 . C136 . H1361 . 118.7    no
P103 . C137 . C138 . 111.12(12)    yes
P103 . C137 . C139 . 110.61(12)    yes
C138 . C137 . C139 . 109.86(15)    yes
P103 . C137 . H1371 . 108.1    no
C138 . C137 . H1371 . 108.2    no
C139 . C137 . H1371 . 108.9    no
C137 . C138 . H1381 . 111.1    no
C137 . C138 . H1382 . 110.7    no
H1381 . C138 . H1382 . 107.7    no
C137 . C138 . H1383 . 109.7    no
H1381 . C138 . H1383 . 108.6    no
H1382 . C138 . H1383 . 109.0    no
C137 . C139 . H1391 . 110.7    no
C137 . C139 . H1392 . 109.1    no
H1391 . C139 . H1392 . 108.2    no
C137 . C139 . H1393 . 111.6    no
H1391 . C139 . H1393 . 109.8    no
H1392 . C139 . H1393 . 107.2    no
O101 . C143 . C144 . 105.04(15)    yes
O101 . C143 . H1431 . 109.4    no
C144 . C143 . H1431 . 110.4    no
O101 . C143 . H1432 . 109.3    no
C144 . C143 . H1432 . 111.6    no
H1431 . C143 . H1432 . 111.0    no
C143 . C144 . C145 . 104.55(15)    yes
C143 . C144 . H1441 . 109.8    no
C145 . C144 . H1441 . 112.3    no
C143 . C144 . H1442 . 108.8    no
C145 . C144 . H1442 . 110.9    no
H1441 . C144 . H1442 . 110.3    no
C144 . C145 . C146 . 103.99(15)    yes
C144 . C145 . H1451 . 111.1    no
C146 . C145 . H1451 . 110.5    no
C144 . C145 . H1452 . 112.7    no
C146 . C145 . H1452 . 110.5    no
H1451 . C145 . H1452 . 108.1    no
C145 . C146 . O101 . 105.74(15)    yes
C145 . C146 . H1461 . 113.4    no
O101 . C146 . H1461 . 108.4    no
C145 . C146 . H1462 . 110.5    no
O101 . C146 . H1462 . 109.7    no
H1461 . C146 . H1462 . 108.9    no
C109 . C211 . H2111 . 112.5    no
C109 . C211 . H2112 . 108.1    no
H2111 . C211 . H2112 . 108.4    no
C109 . C211 . H2113 . 108.3    no
H2111 . C211 . H2113 . 108.9    no
H2112 . C211 . H2113 . 110.5    no
C109 . C212 . H2121 . 111.2    no
C109 . C212 . H2122 . 110.1    no
H2121 . C212 . H2122 . 108.2    no
C109 . C212 . H2123 . 109.7    no
H2121 . C212 . H2123 . 108.5    no
H2122 . C212 . H2123 . 109.2    no
C241 . C240 . H2401 . 107.8    no
C241 . C240 . H2402 . 109.3    no
H2401 . C240 . H2402 . 110.0    no
C241 . C240 . H2403 . 111.1    no
H2401 . C240 . H2403 . 109.1    no
H2402 . C240 . H2403 . 109.4    no
P103 . C241 . C240 . 115.1(3)    yes
P103 . C241 . C242 . 114.6(3)    yes
C240 . C241 . C242 . 110.4(3)    yes
P103 . C241 . H2411 . 104.0    no
C240 . C241 . H2411 . 105.9    no
C242 . C241 . H2411 . 105.8    no
C241 . C242 . H2421 . 109.6    no
C241 . C242 . H2422 . 110.9    no
H2421 . C242 . H2422 . 109.4    no
C241 . C242 . H2423 . 109.1    no
H2421 . C242 . H2423 . 109.2    no
H2422 . C242 . H2423 . 108.5    no
C244 . C243 . H2431 . 109.7    no
C244 . C243 . H2432 . 110.6    no
H2431 . C243 . H2432 . 109.9    no
C244 . C243 . H2433 . 110.0    no
H2431 . C243 . H2433 . 108.7    no
H2432 . C243 . H2433 . 107.9    no
C243 . C244 . P103 . 108.3(3)    yes
C243 . C244 . C245 . 108.8(3)    yes
P103 . C244 . C245 . 118.8(3)    yes
C243 . C244 . H2441 . 108.2    no
P103 . C244 . H2441 . 104.8    no
C245 . C244 . H2441 . 107.4    no
C244 . C245 . H2451 . 108.8    no
C244 . C245 . H2452 . 110.0    no
H2451 . C245 . H2452 . 109.0    no
C244 . C245 . H2453 . 110.5    no
H2451 . C245 . H2453 . 107.7    no
H2452 . C245 . H2453 . 110.9    no


_iucr_refine_instructions_details_constraints
;
#
# Punched on 28/01/14 at 14:59:10
#
#LIST     12                                                                    
BLOCK 
CONT SCALE 
CONT CO   (    1 ,X'S,U'S)  UNTIL C    (  146 ) 
CONT C    (  211 ,X'S,U[ISO])  UNTIL C    (  245 ) 
SUMFIX PART(1001,OCC) AND PART(1002, OCC) 
SUMFIX PART(1003,OCC) AND PART(1004, OCC) 
RIDE C   (   2,X'S) H   (  21,X'S) 
RIDE C   (   4,X'S) H   (  41,X'S) H   (  42,X'S) H   (  43,X'S) 
RIDE C   (   5,X'S) H   (  51,X'S) 
RIDE C   (   7,X'S) H   (  71,X'S) H   (  72,X'S) H   (  73,X'S) 
RIDE C   (   8,X'S) H   (  81,X'S) 
RIDE C   (   9,X'S) H   (  91,X'S) 
RIDE C   (  10,X'S) H   ( 101,X'S) H   ( 102,X'S) H   ( 103,X'S) 
RIDE C   (  11,X'S) H   ( 111,X'S) H   ( 112,X'S) H   ( 113,X'S) 
RIDE C   (  12,X'S) H   ( 121,X'S) 
RIDE C   (  13,X'S) H   ( 131,X'S) H   ( 132,X'S) H   ( 133,X'S) 
RIDE C   (  14,X'S) H   ( 141,X'S) H   ( 142,X'S) H   ( 143,X'S) 
RIDE C   (  16,X'S) H   ( 161,X'S) 
RIDE C   (  18,X'S) H   ( 181,X'S) H   ( 182,X'S) H   ( 183,X'S) 
RIDE C   (  19,X'S) H   ( 191,X'S) 
RIDE C   (  21,X'S) H   ( 211,X'S) H   ( 212,X'S) H   ( 213,X'S) 
RIDE C   (  22,X'S) H   ( 221,X'S) 
RIDE C   (  23,X'S) H   ( 231,X'S) 
RIDE C   (  24,X'S) H   ( 241,X'S) H   ( 242,X'S) H   ( 243,X'S) 
RIDE C   (  25,X'S) H   ( 251,X'S) H   ( 252,X'S) H   ( 253,X'S) 
RIDE C   (  26,X'S) H   ( 261,X'S) 
RIDE C   (  27,X'S) H   ( 271,X'S) H   ( 272,X'S) H   ( 273,X'S) 
RIDE C   (  28,X'S) H   ( 281,X'S) H   ( 282,X'S) H   ( 283,X'S) 
RIDE C   (  30,X'S) H   ( 301,X'S) 
RIDE C   (  32,X'S) H   ( 321,X'S) H   ( 322,X'S) H   ( 323,X'S) 
RIDE C   (  33,X'S) H   ( 331,X'S) 
RIDE C   (  35,X'S) H   ( 351,X'S) H   ( 352,X'S) H   ( 353,X'S) 
RIDE C   (  36,X'S) H   ( 361,X'S) 
RIDE C   (  37,X'S) H   ( 371,X'S) 
RIDE C   (  38,X'S) H   ( 381,X'S) H   ( 382,X'S) H   ( 383,X'S) 
RIDE C   (  39,X'S) H   ( 391,X'S) H   ( 392,X'S) H   ( 393,X'S) 
RIDE C   (  40,X'S) H   ( 401,X'S) 
RIDE C   (  41,X'S) H   ( 411,X'S) H   ( 412,X'S) H   ( 413,X'S) 
RIDE C   (  42,X'S) H   ( 421,X'S) H   ( 422,X'S) H   ( 423,X'S) 
RIDE C   (  43,X'S) H   ( 431,X'S) H   ( 432,X'S) 
RIDE C   (  44,X'S) H   ( 441,X'S) H   ( 442,X'S) 
RIDE C   (  45,X'S) H   ( 451,X'S) H   ( 452,X'S) 
RIDE C   (  46,X'S) H   ( 461,X'S) H   ( 462,X'S) 
RIDE C   (  47,X'S) H   ( 471,X'S) H   ( 472,X'S) H   ( 473,X'S) 
RIDE C   (  48,X'S) H   ( 481,X'S) H   ( 482,X'S) 
RIDE C   (  49,X'S) H   ( 491,X'S) H   ( 492,X'S) 
RIDE C   (  50,X'S) H   ( 501,X'S) H   ( 502,X'S) H   ( 503,X'S) 
RIDE C   (  51,X'S) H   ( 511,X'S) H   ( 512,X'S) H   ( 513,X'S) 
RIDE C   (  52,X'S) H   ( 521,X'S) H   ( 522,X'S) 
RIDE C   (  53,X'S) H   ( 531,X'S) H   ( 532,X'S) 
RIDE C   (  54,X'S) H   ( 541,X'S) H   ( 542,X'S) H   ( 543,X'S) 
RIDE C   ( 102,X'S) H   (1021,X'S) 
RIDE C   ( 104,X'S) H   (1041,X'S) H   (1042,X'S) H   (1043,X'S) 
RIDE C   ( 105,X'S) H   (1051,X'S) 
RIDE C   ( 107,X'S) H   (1071,X'S) H   (1072,X'S) H   (1073,X'S) 
RIDE C   ( 108,X'S) H   (1081,X'S) 
RIDE C   ( 109,X'S) H   (1091,X'S) H   (1092,X'S) 
RIDE C   ( 110,X'S) H   (1101,X'S) H   (1102,X'S) H   (1103,X'S) 
RIDE C   ( 112,X'S) H   (1121,X'S) 
RIDE C   ( 113,X'S) H   (1131,X'S) H   (1132,X'S) H   (1133,X'S) 
RIDE C   ( 114,X'S) H   (1141,X'S) H   (1142,X'S) H   (1143,X'S) 
RIDE C   ( 116,X'S) H   (1161,X'S) 
RIDE C   ( 118,X'S) H   (1181,X'S) H   (1182,X'S) H   (1183,X'S) 
RIDE C   ( 119,X'S) H   (1191,X'S) 
RIDE C   ( 121,X'S) H   (1211,X'S) H   (1212,X'S) H   (1213,X'S) 
RIDE C   ( 122,X'S) H   (1221,X'S) 
RIDE C   ( 123,X'S) H   (1231,X'S) 
RIDE C   ( 124,X'S) H   (1241,X'S) H   (1242,X'S) H   (1243,X'S) 
RIDE C   ( 125,X'S) H   (1251,X'S) H   (1252,X'S) H   (1253,X'S) 
RIDE C   ( 126,X'S) H   (1261,X'S) 
RIDE C   ( 127,X'S) H   (1271,X'S) H   (1272,X'S) H   (1273,X'S) 
RIDE C   ( 128,X'S) H   (1281,X'S) H   (1282,X'S) H   (1283,X'S) 
RIDE C   ( 130,X'S) H   (1301,X'S) 
RIDE C   ( 132,X'S) H   (1321,X'S) H   (1322,X'S) H   (1323,X'S) 
RIDE C   ( 133,X'S) H   (1331,X'S) 
RIDE C   ( 135,X'S) H   (1351,X'S) H   (1352,X'S) H   (1353,X'S) 
RIDE C   ( 136,X'S) H   (1361,X'S) 
RIDE C   ( 137,X'S) H   (1371,X'S) 
RIDE C   ( 138,X'S) H   (1381,X'S) H   (1382,X'S) H   (1383,X'S) 
RIDE C   ( 139,X'S) H   (1391,X'S) H   (1392,X'S) H   (1393,X'S) 
RIDE C   ( 143,X'S) H   (1431,X'S) H   (1432,X'S) 
RIDE C   ( 144,X'S) H   (1441,X'S) H   (1442,X'S) 
RIDE C   ( 145,X'S) H   (1451,X'S) H   (1452,X'S) 
RIDE C   ( 146,X'S) H   (1461,X'S) H   (1462,X'S) 
RIDE C   ( 211,X'S) H   (2111,X'S) H   (2112,X'S) H   (2113,X'S) 
RIDE C   ( 212,X'S) H   (2121,X'S) H   (2122,X'S) H   (2123,X'S) 
RIDE C   ( 240,X'S) H   (2401,X'S) H   (2402,X'S) H   (2403,X'S) 
RIDE C   ( 241,X'S) H   (2411,X'S) 
RIDE C   ( 242,X'S) H   (2421,X'S) H   (2422,X'S) H   (2423,X'S) 
RIDE C   ( 243,X'S) H   (2431,X'S) H   (2432,X'S) H   (2433,X'S) 
RIDE C   ( 244,X'S) H   (2441,X'S) 
RIDE C   ( 245,X'S) H   (2451,X'S) H   (2452,X'S) H   (2453,X'S) 
END                                                                             
;


_iucr_refine_instructions_details_restraints
;
#
# Punched on 28/01/14 at 14:59:10
#
#LIST     16                                                                    
NO 
REM   HREST   START (DO NOT REMOVE THIS LINE) 
REM   HREST   END (DO NOT REMOVE THIS LINE) 
END                                                                             
;

####

data_5 
_audit_creation_date        "2014-02-25"
_audit_creation_method CRYSTALS_ver_14.43

_oxford_structure_analysis_title  'bw_306_0m in P-1'
_chemical_name_systematic         ?
_chemical_melting_point           ?

_vrf_PLAT201_5
;
PROBLEM: Isotropic non-H Atoms in Main Residue(s) .......          6     
         
RESPONSE: C atoms on two partially disordered
isopropyl groups of the ligands were refined by 
using isotropic displacement parameters. 
;

_cell_length_a                    10.2861(7)
_cell_length_b                    22.3494(15)
_cell_length_c                    23.0140(16)
_cell_angle_alpha                 114.859(3)
_cell_angle_beta                  95.714(4)
_cell_angle_gamma                 96.367(4)
_cell_volume                      4707.7(6)
 
_symmetry_cell_setting            'triclinic' 
_symmetry_space_group_name_H-M    'P -1 ' 
_symmetry_space_group_name_Hall   '-P 1 ' 
loop_
 _symmetry_equiv_pos_as_xyz
 'x,y,z'
 '-x,-y,-z'

loop_
_atom_type_symbol
_atom_type_scat_dispersion_real
_atom_type_scat_dispersion_imag
_atom_type_scat_Cromer_Mann_a1
_atom_type_scat_Cromer_Mann_b1
_atom_type_scat_Cromer_Mann_a2
_atom_type_scat_Cromer_Mann_b2
_atom_type_scat_Cromer_Mann_a3
_atom_type_scat_Cromer_Mann_b3
_atom_type_scat_Cromer_Mann_a4
_atom_type_scat_Cromer_Mann_b4
_atom_type_scat_Cromer_Mann_c
_atom_type_scat_source  
 C       0.0033   0.0016   2.3100  20.8439   1.0200  10.2075   1.5886   0.5687
   0.8650  51.6512   0.2156 'International Tables Vol C 4.2.6.8 and 6.1.1.4'
 H       0.0000   0.0000   0.4930  10.5109   0.3229  26.1257   0.1402   3.1424
   0.0408  57.7998   0.0030 'International Tables Vol C 4.2.6.8 and 6.1.1.4'
 N       0.0061   0.0033  12.2126   0.0057   3.1322   9.8933   2.0125  28.9975
   1.1663   0.5826 -11.5290 'International Tables Vol C 4.2.6.8 and 6.1.1.4'
 O       0.0106   0.0060   3.0485  13.2771   2.2868   5.7011   1.5463   0.3239
   0.8670  32.9089   0.2508 'International Tables Vol C 4.2.6.8 and 6.1.1.4'
 P       0.1023   0.0942   6.4345   1.9067   4.1791  27.1570   1.7800   0.5260
   1.4908  68.1645   1.1149 'International Tables Vol C 4.2.6.8 and 6.1.1.4'
 Ti      0.2776   0.4457   9.7595   7.8508   7.3558   0.5000   1.6991  35.6338
   1.9021 116.1050   1.2807 'International Tables Vol C 4.2.6.8 and 6.1.1.4'
 Co      0.3494   0.9721  12.2841   4.2791   7.3409   0.2784   4.0034  13.5359
   2.3488  71.1692   1.0118 'International Tables Vol C 4.2.6.8 and 6.1.1.4'
 
 
_cell_formula_units_Z                    4

# Given Formula = C46 H77 Co1 N3 O1 P3 Ti1 
# Dc =      1.25 Fooo =   1904.00 Mu =      6.60 M =   1775.78
# Found Formula = C46 H77 Co1 N3 O1 P3 Ti1 
# Dc =      1.25 FOOO =   1904.00 Mu =      6.60 M =   1775.78

_chemical_formula_sum             'C46 H77 Co1 N3 O1 P3 Ti1'
_chemical_formula_moiety          'C46 H77 Co1 N3 O1 P3 Ti1'
_chemical_compound_source                ?
_chemical_formula_weight            887.89
 
 
_cell_measurement_reflns_used         9996
_cell_measurement_theta_min              2
_cell_measurement_theta_max             28
_cell_measurement_temperature          120
 
_exptl_crystal_description        'prism' 
_exptl_crystal_colour             'green' 
_exptl_crystal_size_min           0.130 
_exptl_crystal_size_mid           0.240 
_exptl_crystal_size_max           0.330 
 
_exptl_crystal_density_diffrn     1.253 
_exptl_crystal_density_meas       ? 
_exptl_crystal_density_method     'not measured' 
# Non-dispersive F(000): 
_exptl_crystal_F_000              1904 
_exptl_absorpt_coefficient_mu     0.660 
 
# Sheldrick geometric approximatio 0.85 0.92 
_exptl_absorpt_correction_type    numerical 
_exptl_absorpt_process_details 
; 
 Analytical Absorption (De Meulenaer & Tompa, 1965) 
; 
_exptl_absorpt_correction_T_min   0.85 
_exptl_absorpt_correction_T_max   0.92 
_diffrn_measurement_device_type   'Bruker Kappa Apex2' 
_diffrn_measurement_device        'Area' 
_diffrn_radiation_monochromator   'graphite' 
_diffrn_radiation_type            'Mo K\a'
_diffrn_radiation_wavelength           0.71073
_diffrn_measurement_method        '\f & \w scans' 
 
# If a reference occurs more than once, delete the author 
# and date from subsequent references. 
_computing_data_collection        'Apex2 (Bruker AXS, 2006)' 
_computing_cell_refinement        'Apex2 (Bruker AXS, 2006)' 
_computing_data_reduction         'Apex2 (Bruker AXS, 2006)' 
_computing_structure_solution     'SIR92 (Altomare et al., 1994)' 
_computing_structure_refinement   'CRYSTALS (Betteridge et al., 2003)' 
_computing_publication_material   'CRYSTALS (Betteridge et al., 2003)' 
_computing_molecular_graphics     'CAMERON (Watkin et al., 1996)' 
 
_diffrn_standards_interval_time   . 
_diffrn_standards_interval_count  . 
_diffrn_standards_number          0 
_diffrn_standards_decay_%         ? 
 
_diffrn_ambient_temperature        120
_diffrn_reflns_number             82034 
_reflns_number_total              22714 
_diffrn_reflns_av_R_equivalents   0.052 
# Number of reflections without Friedels Law is 0 
# Number of reflections with Friedels Law is 22714 
# Theoretical number of reflections is about 45655 
 
 
_diffrn_reflns_theta_min          1.701 
_diffrn_reflns_theta_max          28.042 
_diffrn_measured_fraction_theta_max 0.994 
 
_diffrn_reflns_theta_full         27.481 
_diffrn_measured_fraction_theta_full 0.999 
 
 
_diffrn_reflns_limit_h_min        -13 
_diffrn_reflns_limit_h_max        13 
_diffrn_reflns_limit_k_min        -28 
_diffrn_reflns_limit_k_max        29 
_diffrn_reflns_limit_l_min        -30 
_diffrn_reflns_limit_l_max        30 
_reflns_limit_h_min               -13 
_reflns_limit_h_max               13 
_reflns_limit_k_min               -29 
_reflns_limit_k_max               26 
_reflns_limit_l_min               0 
_reflns_limit_l_max               30 
 
_oxford_diffrn_Wilson_B_factor    1.14 
_oxford_diffrn_Wilson_scale       194.51 
 
_atom_sites_solution_primary      direct #heavy,direct,difmap,geom
# _atom_sites_solution_secondary  difmap
_atom_sites_solution_hydrogens    difmap
 
_refine_diff_density_min          -0.76 
_refine_diff_density_max          1.21 
 
 
# The current dictionary definitions do not cover the 
# situation where the reflections used for refinement were 
# selected by a user-defined sigma threshold 
 
 
# The values actually used during refinement 
_oxford_reflns_threshold_expression_ref     I>-10.0\s(I)
_refine_ls_number_reflns          22714 
_refine_ls_number_restraints      0 
_refine_ls_number_parameters      987 
_oxford_refine_ls_R_factor_ref    0.0691 
_refine_ls_wR_factor_ref          0.0926 
_refine_ls_goodness_of_fit_ref    1.0000 
_refine_ls_shift/su_max           0.0034300 
_refine_ls_shift/su_mean          0.0001937 
 
 
# The values computed with all filters except I/sigma 
_oxford_reflns_number_all         22714 
_refine_ls_R_factor_all           0.0691 
_refine_ls_wR_factor_all          0.0926 
 
# The values computed with a 2 sigma cutoff - a la SHELX 
_reflns_threshold_expression      I>2.0\s(I)
_reflns_number_gt                 15270 
_refine_ls_R_factor_gt            0.0382 
_refine_ls_wR_factor_gt           0.0803 
 
# choose from: rm (reference molecule of known chirality), 
# ad (anomolous dispersion - Flack), rmad (rm and ad), 
# syn (from synthesis), unk (unknown) or . (not applicable). 
_chemical_absolute_configuration  '.' 
 
 
_refine_ls_structure_factor_coef  Fsqd 
_refine_ls_matrix_type            full
_refine_ls_hydrogen_treatment     constr         #undef, noref, refall,
                                                 # refxyz, refU, constr or mixed
_refine_ls_weighting_scheme       calc 
_refine_ls_weighting_details 
;
 Method= Modified Sheldrick 
 w=1/[\s^2^(F^2^) + ( 0.03P)^2^ + 3.82P] 
 ,where P=(max(Fo^2^,0) + 2Fc^2^)/3 
;
# Insert your own references if required - in alphabetical order 
_publ_section_references 
; 
Altomare, A., Cascarano, G., Giacovazzo, C., Guagliardi, A., Burla, M.C., 
Polidori, G. & Camalli, M. (1994). J. Appl. Cryst. 27, 435. 
 
Betteridge, P.W., Carruthers, J.R., Cooper, R.I., 
Prout, K. & Watkin, D.J. (2003). J. Appl. Cryst. 36, 1487. 
 
Bruker Analytical X-ray Systems, Inc., 2006. <i>Apex2</i>, 
Version 2 User Manual, M86-E01078, Madison, WI. 
 
De Meulenaer, J. & Tompa, H. (1965). Acta Cryst. 19, 1014. 
 
Watkin, D.J., Prout, C.K. & Pearce, L.J. (1996). CAMERON, Chemical 
Crystallography Laboratory, Oxford, UK. 
; 

# Uequiv = arithmetic mean of Ui i.e. Ueqiv = (U1+U2+U3)/3

# Replace last . with number of unfound hydrogen atoms attached to an atom.

# ..._refinement_flags_... 
# . no refinement constraints           S special position constraint on site
# G rigid group refinement of site      R riding atom
# D distance or angle restraint on site T thermal displacement constraints
# U Uiso or Uij restraint (rigid bond)  P partial occupancy constraint


loop_
_atom_site_label
_atom_site_type_symbol
_atom_site_fract_x
_atom_site_fract_y
_atom_site_fract_z
_atom_site_U_iso_or_equiv
_atom_site_occupancy
_atom_site_adp_type
_atom_site_refinement_flags_posn
_atom_site_refinement_flags_adp
_atom_site_refinement_flags_occupancy
_atom_site_disorder_assembly
_atom_site_disorder_group
_atom_site_attached_hydrogens
Co1 Co 0.59097(3) 0.489846(13) 0.755289(13) 0.0121 1.0000 Uani . . . . . . 
Co101 Co 1.40433(3) 0.996360(13) 0.741712(13) 0.0126 1.0000 Uani . . . . . . 
Ti1 Ti 0.78974(4) 0.492811(18) 0.766327(17) 0.0118 1.0000 Uani . . . . . . 
Ti101 Ti 1.20452(4) 0.989948(18) 0.730217(18) 0.0121 1.0000 Uani . . . . . . 
P1 P 0.66185(5) 0.59374(3) 0.83453(3) 0.0142 1.0000 Uani . . . . . . 
P2 P 0.62700(5) 0.47910(3) 0.65740(3) 0.0135 1.0000 Uani . . . . . . 
P3 P 0.60340(5) 0.40048(3) 0.77501(3) 0.0149 1.0000 Uani . . . . . . 
P101 P 1.34112(6) 0.88927(3) 0.66898(3) 0.0195 1.0000 Uani . . . . . . 
P102 P 1.38074(5) 1.07555(3) 0.70832(3) 0.0147 1.0000 Uani . . . . . . 
P103 P 1.37142(5) 1.01771(3) 0.84251(3) 0.0134 1.0000 Uani . . . . . . 
O1 O 1.01160(14) 0.47892(7) 0.76401(7) 0.0173 1.0000 Uani . . . . . . 
O101 O 0.97972(14) 0.99750(7) 0.72908(7) 0.0176 1.0000 Uani . . . . . . 
N1 N 0.82317(17) 0.58927(8) 0.83260(9) 0.0165 1.0000 Uani . . . . . . 
N2 N 0.78497(17) 0.47042(9) 0.67044(8) 0.0156 1.0000 Uani . . . . . . 
N3 N 0.76849(17) 0.41917(8) 0.79657(9) 0.0154 1.0000 Uani . . . . . . 
N101 N 1.17949(18) 0.89164(9) 0.67250(9) 0.0183 1.0000 Uani . . . . . . 
N102 N 1.21600(17) 1.05351(9) 0.68761(9) 0.0160 1.0000 Uani . . . . . . 
N103 N 1.21124(17) 1.02155(9) 0.82744(8) 0.0153 1.0000 Uani . . . . . . 
C1 C 0.9422(2) 0.63500(10) 0.86523(10) 0.0159 1.0000 Uani . . . . . . 
C2 C 1.0099(2) 0.63758(11) 0.92201(11) 0.0196 1.0000 Uani . . . . . . 
C3 C 1.1339(2) 0.67734(11) 0.95064(11) 0.0230 1.0000 Uani . . . . . . 
C4 C 1.2065(3) 0.67867(14) 1.01151(12) 0.0358 1.0000 Uani . . . . . . 
C5 C 1.1898(2) 0.71507(11) 0.92147(11) 0.0239 1.0000 Uani . . . . . . 
C6 C 1.1236(2) 0.71491(11) 0.86601(12) 0.0225 1.0000 Uani . . . . . . 
C7 C 1.1819(3) 0.75849(12) 0.83641(14) 0.0338 1.0000 Uani . . . . . . 
C8 C 1.0005(2) 0.67406(10) 0.83787(11) 0.0189 1.0000 Uani . . . . . . 
C9 C 0.6346(2) 0.61356(11) 0.91910(10) 0.0212 1.0000 Uani . . . . . . 
C10 C 0.6965(3) 0.68204(12) 0.97333(12) 0.0323 1.0000 Uani . . . . . . 
C11 C 0.4873(2) 0.59729(14) 0.92210(12) 0.0312 1.0000 Uani . . . . . . 
C12 C 0.6236(2) 0.66527(10) 0.81798(11) 0.0181 1.0000 Uani . . . . . . 
C13 C 0.7032(2) 0.73529(11) 0.85949(12) 0.0263 1.0000 Uani . . . . . . 
C14 C 0.4750(2) 0.66820(12) 0.81419(12) 0.0256 1.0000 Uani . . . . . . 
C15 C 0.8871(2) 0.47647(11) 0.63544(10) 0.0176 1.0000 Uani . . . . . . 
C16 C 0.9717(2) 0.53726(11) 0.65651(11) 0.0204 1.0000 Uani . . . . . . 
C17 C 1.0719(2) 0.54472(13) 0.62224(12) 0.0251 1.0000 Uani . . . . . . 
C18 C 1.1622(3) 0.61121(14) 0.64699(14) 0.0373 1.0000 Uani . . . . . . 
C19 C 1.0868(2) 0.49027(13) 0.56673(12) 0.0279 1.0000 Uani . . . . . . 
C20 C 1.0065(2) 0.42862(13) 0.54551(11) 0.0262 1.0000 Uani . . . . . . 
C21 C 1.0279(3) 0.36927(15) 0.48609(13) 0.0420 1.0000 Uani . . . . . . 
C22 C 0.9084(2) 0.42180(12) 0.58052(11) 0.0216 1.0000 Uani . . . . . . 
C23 C 0.6314(2) 0.55290(11) 0.63894(10) 0.0171 1.0000 Uani . . . . . . 
C24 C 0.6794(2) 0.54766(12) 0.57623(11) 0.0242 1.0000 Uani . . . . . . 
C25 C 0.5006(2) 0.58009(12) 0.64460(12) 0.0234 1.0000 Uani . . . . . . 
C26 C 0.5316(2) 0.40588(11) 0.58379(10) 0.0188 1.0000 Uani . . . . . . 
C27 C 0.5728(2) 0.38601(13) 0.51698(11) 0.0288 1.0000 Uani . . . . . . 
C28 C 0.3849(2) 0.41172(12) 0.57965(12) 0.0256 1.0000 Uani . . . . . . 
C29 C 0.8552(2) 0.39404(11) 0.82807(10) 0.0167 1.0000 Uani . . . . . . 
C30 C 0.8481(2) 0.32600(11) 0.81316(11) 0.0187 1.0000 Uani . . . . . . 
C31 C 0.9436(2) 0.30357(11) 0.84236(12) 0.0227 1.0000 Uani . . . . . . 
C32 C 0.9363(3) 0.23021(12) 0.82465(14) 0.0335 1.0000 Uani . . . . . . 
C33 C 1.0471(2) 0.34997(12) 0.88840(11) 0.0234 1.0000 Uani . . . . . . 
C34 C 1.0551(2) 0.41803(12) 0.90577(11) 0.0219 1.0000 Uani . . . . . . 
C35 C 1.1650(3) 0.46840(13) 0.95721(12) 0.0324 1.0000 Uani . . . . . . 
C36 C 0.9594(2) 0.43912(11) 0.87556(10) 0.0187 1.0000 Uani . . . . . . 
C37 C 0.5625(2) 0.31364(10) 0.70642(11) 0.0188 1.0000 Uani . . . . . . 
C38 C 0.6682(2) 0.30137(11) 0.66256(11) 0.0227 1.0000 Uani . . . . . . 
C39 C 0.4250(2) 0.30185(11) 0.66761(12) 0.0251 1.0000 Uani . . . . . . 
C40 C 0.5369(2) 0.38349(11) 0.83991(12) 0.0239 1.0000 Uani . . . . . . 
C41 C 0.5938(3) 0.43856(14) 0.90676(12) 0.0331 1.0000 Uani . . . . . . 
C42 C 0.3862(3) 0.37232(16) 0.83081(14) 0.0452 1.0000 Uani . . . . . . 
C43 C 1.1411(2) 0.51868(12) 0.79352(12) 0.0254 1.0000 Uani . . . . . . 
C44 C 1.2317(2) 0.48969(12) 0.74400(12) 0.0275 1.0000 Uani . . . . . . 
C45 C 1.1595(2) 0.41949(12) 0.69854(12) 0.0251 1.0000 Uani . . . . . . 
C46 C 1.0344(2) 0.41117(11) 0.72618(11) 0.0210 1.0000 Uani . . . . . . 
C101 C 1.0637(2) 0.84240(10) 0.64481(11) 0.0189 1.0000 Uani . . . . . . 
C102 C 1.0129(2) 0.80960(11) 0.67969(11) 0.0219 1.0000 Uani . . . . . . 
C103 C 0.8907(2) 0.76733(11) 0.65764(12) 0.0257 1.0000 Uani . . . . . . 
C104 C 0.8394(3) 0.73207(13) 0.69602(14) 0.0350 1.0000 Uani . . . . . . 
C105 C 0.8179(2) 0.75885(11) 0.59995(12) 0.0256 1.0000 Uani . . . . . . 
C106 C 0.8661(2) 0.78972(12) 0.56331(12) 0.0272 1.0000 Uani . . . . . . 
C107 C 0.7882(3) 0.77875(14) 0.49968(13) 0.0402 1.0000 Uani . . . . . . 
C108 C 0.9895(2) 0.83115(11) 0.58625(11) 0.0241 1.0000 Uani . . . . . . 
C109 C 1.3881(3) 0.82327(15) 0.69640(17) 0.0200(7) 0.744(4) Uiso . . P 1 1 . 
C110 C 1.3213(3) 0.75145(16) 0.65185(16) 0.0273(8) 0.744(4) Uiso . . P 1 1 . 
C111 C 1.5375(3) 0.82657(18) 0.71174(18) 0.0334(9) 0.744(4) Uiso . . P 1 1 . 
C112 C 1.3577(4) 0.8476(2) 0.58383(19) 0.0209(9) 0.608(4) Uiso . . P 1 3 . 
C113 C 1.3096(4) 0.8875(2) 0.5489(2) 0.0253(10) 0.608(4) Uiso . . P 1 3 . 
C114 C 1.4915(5) 0.8309(2) 0.5691(2) 0.0386(12) 0.608(4) Uiso . . P 1 3 . 
C115 C 1.1233(2) 1.07117(11) 0.65142(10) 0.0172 1.0000 Uani . . . . . . 
C116 C 1.0233(2) 1.02041(11) 0.60595(10) 0.0190 1.0000 Uani . . . . . . 
C117 C 0.9217(2) 1.03382(12) 0.57162(11) 0.0226 1.0000 Uani . . . . . . 
C118 C 0.8166(2) 0.97726(13) 0.52333(12) 0.0295 1.0000 Uani . . . . . . 
C119 C 0.9192(2) 1.09987(13) 0.58236(12) 0.0258 1.0000 Uani . . . . . . 
C120 C 1.0179(2) 1.15159(12) 0.62612(12) 0.0233 1.0000 Uani . . . . . . 
C121 C 1.0130(3) 1.22334(13) 0.63915(14) 0.0340 1.0000 Uani . . . . . . 
C122 C 1.1194(2) 1.13670(11) 0.65992(11) 0.0193 1.0000 Uani . . . . . . 
C123 C 1.4515(2) 1.07025(11) 0.63525(11) 0.0214 1.0000 Uani . . . . . . 
C124 C 1.4387(3) 1.12527(12) 0.61424(12) 0.0282 1.0000 Uani . . . . . . 
C125 C 1.5959(3) 1.0596(2) 0.64021(18) 0.0651 1.0000 Uani . . . . . . 
C126 C 1.4174(2) 1.16701(10) 0.76433(11) 0.0197 1.0000 Uani . . . . . . 
C127 C 1.3199(2) 1.18513(11) 0.81265(11) 0.0249 1.0000 Uani . . . . . . 
C128 C 1.5609(2) 1.18619(12) 0.79908(13) 0.0320 1.0000 Uani . . . . . . 
C129 C 1.1118(2) 1.02376(10) 0.86626(10) 0.0142 1.0000 Uani . . . . . . 
C130 C 1.0890(2) 1.08405(11) 0.91310(10) 0.0179 1.0000 Uani . . . . . . 
C131 C 0.9918(2) 1.08626(11) 0.95126(11) 0.0210 1.0000 Uani . . . . . . 
C132 C 0.9667(3) 1.15218(13) 1.00060(13) 0.0362 1.0000 Uani . . . . . . 
C133 C 0.9162(2) 1.02641(12) 0.94221(11) 0.0229 1.0000 Uani . . . . . . 
C134 C 0.9342(2) 0.96527(11) 0.89440(11) 0.0205 1.0000 Uani . . . . . . 
C135 C 0.8509(2) 0.90069(13) 0.88422(14) 0.0313 1.0000 Uani . . . . . . 
C136 C 1.0312(2) 0.96485(11) 0.85667(11) 0.0180 1.0000 Uani . . . . . . 
C137 C 1.4607(2) 1.09763(11) 0.91075(10) 0.0184 1.0000 Uani . . . . . . 
C138 C 1.4267(2) 1.11916(13) 0.97917(11) 0.0282 1.0000 Uani . . . . . . 
C139 C 1.6103(2) 1.10126(13) 0.91348(12) 0.0294 1.0000 Uani . . . . . . 
C140 C 1.3778(2) 0.95083(11) 0.87037(10) 0.0190 1.0000 Uani . . . . . . 
C141 C 1.3241(2) 0.95867(13) 0.93224(11) 0.0255 1.0000 Uani . . . . . . 
C142 C 1.5156(2) 0.93204(13) 0.87237(12) 0.0295 1.0000 Uani . . . . . . 
C143 C 0.8524(2) 0.95427(11) 0.70289(12) 0.0236 1.0000 Uani . . . . . . 
C144 C 0.7637(2) 0.98546(12) 0.75297(12) 0.0238 1.0000 Uani . . . . . . 
C145 C 0.8264(2) 1.05965(12) 0.78794(12) 0.0241 1.0000 Uani . . . . . . 
C146 C 0.9496(2) 1.06472(11) 0.75788(11) 0.0213 1.0000 Uani . . . . . . 
C209 C 1.3643(8) 0.8103(4) 0.6606(5) 0.0168(19) 0.256(4) Uiso . . P 1 2 . 
C210 C 1.3422(9) 0.8019(5) 0.7202(4) 0.024(2) 0.256(4) Uiso . . P 1 2 . 
C211 C 1.5072(10) 0.7995(5) 0.6486(5) 0.035(3) 0.256(4) Uiso . . P 1 2 . 
C212 C 1.3471(7) 0.8740(4) 0.5779(3) 0.0291(16) 0.392(4) Uiso . . P 1 4 . 
C213 C 1.2818(7) 0.8050(4) 0.5252(4) 0.0394(19) 0.392(4) Uiso . . P 1 4 . 
C214 C 1.4890(8) 0.8941(4) 0.5706(4) 0.052(2) 0.392(4) Uiso . . P 1 4 . 
H21 H 0.9716 0.6115 0.9408 0.0247 1.0000 Uiso R . . . . . 
H41 H 1.1555 0.6900 1.0450 0.0555 1.0000 Uiso R . . . . . 
H42 H 1.2312 0.6377 1.0046 0.0551 1.0000 Uiso R . . . . . 
H43 H 1.2839 0.7096 1.0260 0.0548 1.0000 Uiso R . . . . . 
H51 H 1.2743 0.7427 0.9409 0.0280 1.0000 Uiso R . . . . . 
H71 H 1.1779 0.7346 0.7903 0.0510 1.0000 Uiso R . . . . . 
H72 H 1.2727 0.7751 0.8549 0.0501 1.0000 Uiso R . . . . . 
H73 H 1.1379 0.7966 0.8441 0.0509 1.0000 Uiso R . . . . . 
H81 H 0.9542 0.6726 0.7991 0.0222 1.0000 Uiso R . . . . . 
H91 H 0.6779 0.5811 0.9280 0.0247 1.0000 Uiso R . . . . . 
H101 H 0.6965 0.6812 1.0146 0.0493 1.0000 Uiso R . . . . . 
H102 H 0.6465 0.7157 0.9720 0.0485 1.0000 Uiso R . . . . . 
H103 H 0.7870 0.6948 0.9698 0.0486 1.0000 Uiso R . . . . . 
H111 H 0.4428 0.6320 0.9204 0.0456 1.0000 Uiso R . . . . . 
H112 H 0.4776 0.5949 0.9629 0.0456 1.0000 Uiso R . . . . . 
H113 H 0.4478 0.5542 0.8866 0.0455 1.0000 Uiso R . . . . . 
H121 H 0.6438 0.6523 0.7742 0.0227 1.0000 Uiso R . . . . . 
H131 H 0.7960 0.7344 0.8660 0.0389 1.0000 Uiso R . . . . . 
H132 H 0.6890 0.7633 0.8380 0.0393 1.0000 Uiso R . . . . . 
H133 H 0.6768 0.7553 0.9013 0.0388 1.0000 Uiso R . . . . . 
H141 H 0.4543 0.6940 0.7913 0.0382 1.0000 Uiso R . . . . . 
H142 H 0.4538 0.6882 0.8582 0.0376 1.0000 Uiso R . . . . . 
H143 H 0.4247 0.6243 0.7909 0.0372 1.0000 Uiso R . . . . . 
H161 H 0.9598 0.5733 0.6938 0.0242 1.0000 Uiso R . . . . . 
H181 H 1.2222 0.6200 0.6855 0.0563 1.0000 Uiso R . . . . . 
H182 H 1.2103 0.6105 0.6133 0.0562 1.0000 Uiso R . . . . . 
H183 H 1.1103 0.6468 0.6559 0.0557 1.0000 Uiso R . . . . . 
H191 H 1.1524 0.4955 0.5434 0.0326 1.0000 Uiso R . . . . . 
H211 H 1.0597 0.3831 0.4556 0.0628 1.0000 Uiso R . . . . . 
H212 H 0.9477 0.3379 0.4657 0.0623 1.0000 Uiso R . . . . . 
H213 H 1.0903 0.3468 0.4979 0.0631 1.0000 Uiso R . . . . . 
H221 H 0.8537 0.3798 0.5678 0.0257 1.0000 Uiso R . . . . . 
H231 H 0.6997 0.5861 0.6741 0.0211 1.0000 Uiso R . . . . . 
H241 H 0.6128 0.5200 0.5399 0.0365 1.0000 Uiso R . . . . . 
H242 H 0.6963 0.5912 0.5782 0.0362 1.0000 Uiso R . . . . . 
H243 H 0.7583 0.5286 0.5705 0.0365 1.0000 Uiso R . . . . . 
H251 H 0.5166 0.6260 0.6507 0.0346 1.0000 Uiso R . . . . . 
H252 H 0.4385 0.5542 0.6063 0.0348 1.0000 Uiso R . . . . . 
H253 H 0.4641 0.5796 0.6819 0.0343 1.0000 Uiso R . . . . . 
H261 H 0.5405 0.3691 0.5941 0.0223 1.0000 Uiso R . . . . . 
H271 H 0.5320 0.3403 0.4879 0.0430 1.0000 Uiso R . . . . . 
H272 H 0.6672 0.3899 0.5185 0.0437 1.0000 Uiso R . . . . . 
H273 H 0.5432 0.4144 0.4981 0.0428 1.0000 Uiso R . . . . . 
H281 H 0.3582 0.4271 0.6213 0.0382 1.0000 Uiso R . . . . . 
H282 H 0.3683 0.4429 0.5624 0.0380 1.0000 Uiso R . . . . . 
H283 H 0.3293 0.3693 0.5516 0.0379 1.0000 Uiso R . . . . . 
H301 H 0.7770 0.2954 0.7829 0.0222 1.0000 Uiso R . . . . . 
H321 H 1.0152 0.2207 0.8428 0.0497 1.0000 Uiso R . . . . . 
H322 H 0.9217 0.2051 0.7788 0.0501 1.0000 Uiso R . . . . . 
H323 H 0.8644 0.2150 0.8410 0.0494 1.0000 Uiso R . . . . . 
H331 H 1.1120 0.3357 0.9082 0.0272 1.0000 Uiso R . . . . . 
H351 H 1.1324 0.5038 0.9892 0.0499 1.0000 Uiso R . . . . . 
H352 H 1.2144 0.4488 0.9780 0.0489 1.0000 Uiso R . . . . . 
H353 H 1.2254 0.4877 0.9389 0.0496 1.0000 Uiso R . . . . . 
H361 H 0.9651 0.4843 0.8865 0.0221 1.0000 Uiso R . . . . . 
H371 H 0.5616 0.2830 0.7265 0.0226 1.0000 Uiso R . . . . . 
H381 H 0.6380 0.2598 0.6243 0.0339 1.0000 Uiso R . . . . . 
H382 H 0.7501 0.2994 0.6849 0.0323 1.0000 Uiso R . . . . . 
H383 H 0.6824 0.3369 0.6496 0.0337 1.0000 Uiso R . . . . . 
H391 H 0.4149 0.3384 0.6568 0.0366 1.0000 Uiso R . . . . . 
H392 H 0.4127 0.2615 0.6277 0.0372 1.0000 Uiso R . . . . . 
H393 H 0.3561 0.2960 0.6914 0.0373 1.0000 Uiso R . . . . . 
H401 H 0.5681 0.3424 0.8364 0.0286 1.0000 Uiso R . . . . . 
H411 H 0.5663 0.4256 0.9396 0.0506 1.0000 Uiso R . . . . . 
H412 H 0.5588 0.4791 0.9122 0.0493 1.0000 Uiso R . . . . . 
H413 H 0.6881 0.4474 0.9138 0.0503 1.0000 Uiso R . . . . . 
H421 H 0.3568 0.4120 0.8315 0.0665 1.0000 Uiso R . . . . . 
H422 H 0.3577 0.3653 0.8661 0.0668 1.0000 Uiso R . . . . . 
H423 H 0.3489 0.3341 0.7906 0.0672 1.0000 Uiso R . . . . . 
H431 H 1.1366 0.5648 0.8037 0.0310 1.0000 Uiso R . . . . . 
H432 H 1.1723 0.5138 0.8333 0.0300 1.0000 Uiso R . . . . . 
H441 H 1.2414 0.5156 0.7187 0.0345 1.0000 Uiso R . . . . . 
H442 H 1.3189 0.4895 0.7641 0.0334 1.0000 Uiso R . . . . . 
H451 H 1.2120 0.3861 0.6981 0.0302 1.0000 Uiso R . . . . . 
H452 H 1.1378 0.4158 0.6552 0.0304 1.0000 Uiso R . . . . . 
H461 H 1.0465 0.3895 0.7540 0.0252 1.0000 Uiso R . . . . . 
H462 H 0.9591 0.3860 0.6926 0.0255 1.0000 Uiso R . . . . . 
H1021 H 1.0630 0.8171 0.7194 0.0254 1.0000 Uiso R . . . . . 
H1041 H 0.7452 0.7237 0.6882 0.0531 1.0000 Uiso R . . . . . 
H1042 H 0.8682 0.6901 0.6835 0.0529 1.0000 Uiso R . . . . . 
H1043 H 0.8695 0.7579 0.7410 0.0537 1.0000 Uiso R . . . . . 
H1051 H 0.7342 0.7315 0.5856 0.0309 1.0000 Uiso R . . . . . 
H1071 H 0.8032 0.8178 0.4924 0.0581 1.0000 Uiso R . . . . . 
H1072 H 0.6953 0.7668 0.4972 0.0591 1.0000 Uiso R . . . . . 
H1073 H 0.8159 0.7431 0.4646 0.0593 1.0000 Uiso R . . . . . 
H1081 H 1.0206 0.8529 0.5619 0.0285 1.0000 Uiso R . . . . . 
H1091 H 1.3575 0.8356 0.7385 0.0230 0.744(4) Uiso R . P 1 1 . 
H1101 H 1.3392 0.7236 0.6729 0.0408 0.744(4) Uiso R . P 1 1 . 
H1102 H 1.2274 0.7480 0.6421 0.0408 0.744(4) Uiso R . P 1 1 . 
H1103 H 1.3544 0.7357 0.6115 0.0400 0.744(4) Uiso R . P 1 1 . 
H1111 H 1.5555 0.8026 0.7377 0.0499 0.744(4) Uiso R . P 1 1 . 
H1112 H 1.5722 0.8086 0.6727 0.0490 0.744(4) Uiso R . P 1 1 . 
H1113 H 1.5817 0.8724 0.7359 0.0499 0.744(4) Uiso R . P 1 1 . 
H1121 H 1.2959 0.8040 0.5642 0.0266 0.608(4) Uiso R . P 1 3 . 
H1131 H 1.2380 0.9080 0.5673 0.0378 0.608(4) Uiso R . P 1 3 . 
H1132 H 1.3808 0.9212 0.5537 0.0377 0.608(4) Uiso R . P 1 3 . 
H1133 H 1.2815 0.8586 0.5039 0.0375 0.608(4) Uiso R . P 1 3 . 
H1141 H 1.5156 0.7987 0.5846 0.0589 0.608(4) Uiso R . P 1 3 . 
H1142 H 1.5528 0.8734 0.5895 0.0564 0.608(4) Uiso R . P 1 3 . 
H1143 H 1.4878 0.8132 0.5220 0.0592 0.608(4) Uiso R . P 1 3 . 
H1161 H 1.0247 0.9764 0.5986 0.0227 1.0000 Uiso R . . . . . 
H1181 H 0.8545 0.9450 0.4899 0.0440 1.0000 Uiso R . . . . . 
H1182 H 0.7680 0.9549 0.5441 0.0443 1.0000 Uiso R . . . . . 
H1183 H 0.7542 0.9937 0.5019 0.0441 1.0000 Uiso R . . . . . 
H1191 H 0.8493 1.1106 0.5594 0.0310 1.0000 Uiso R . . . . . 
H1211 H 1.0984 1.2475 0.6453 0.0509 1.0000 Uiso R . . . . . 
H1212 H 0.9743 1.2450 0.6769 0.0513 1.0000 Uiso R . . . . . 
H1213 H 0.9621 1.2251 0.6029 0.0512 1.0000 Uiso R . . . . . 
H1221 H 1.1843 1.1714 0.6892 0.0223 1.0000 Uiso R . . . . . 
H1231 H 1.4020 1.0294 0.6002 0.0255 1.0000 Uiso R . . . . . 
H1241 H 1.4663 1.1136 0.5728 0.0410 1.0000 Uiso R . . . . . 
H1242 H 1.4968 1.1672 0.6458 0.0420 1.0000 Uiso R . . . . . 
H1243 H 1.3479 1.1325 0.6100 0.0420 1.0000 Uiso R . . . . . 
H1251 H 1.6033 1.0253 0.6542 0.0958 1.0000 Uiso R . . . . . 
H1252 H 1.6488 1.1010 0.6706 0.0964 1.0000 Uiso R . . . . . 
H1253 H 1.6213 1.0469 0.5975 0.0956 1.0000 Uiso R . . . . . 
H1261 H 1.4054 1.1914 0.7380 0.0232 1.0000 Uiso R . . . . . 
H1271 H 1.2332 1.1832 0.7912 0.0369 1.0000 Uiso R . . . . . 
H1272 H 1.3119 1.1541 0.8320 0.0364 1.0000 Uiso R . . . . . 
H1273 H 1.3493 1.2293 0.8464 0.0375 1.0000 Uiso R . . . . . 
H1281 H 1.5777 1.2324 0.8296 0.0481 1.0000 Uiso R . . . . . 
H1282 H 1.6213 1.1787 0.7685 0.0478 1.0000 Uiso R . . . . . 
H1283 H 1.5752 1.1597 0.8228 0.0474 1.0000 Uiso R . . . . . 
H1301 H 1.1406 1.1239 0.9182 0.0215 1.0000 Uiso R . . . . . 
H1321 H 0.9100 1.1453 1.0282 0.0544 1.0000 Uiso R . . . . . 
H1322 H 1.0460 1.1797 1.0286 0.0537 1.0000 Uiso R . . . . . 
H1323 H 0.9258 1.1750 0.9790 0.0542 1.0000 Uiso R . . . . . 
H1331 H 0.8529 1.0264 0.9686 0.0278 1.0000 Uiso R . . . . . 
H1351 H 0.7792 0.8870 0.8494 0.0474 1.0000 Uiso R . . . . . 
H1352 H 0.8147 0.9048 0.9221 0.0471 1.0000 Uiso R . . . . . 
H1353 H 0.9035 0.8652 0.8735 0.0475 1.0000 Uiso R . . . . . 
H1361 H 1.0457 0.9237 0.8253 0.0208 1.0000 Uiso R . . . . . 
H1371 H 1.4369 1.1306 0.8965 0.0227 1.0000 Uiso R . . . . . 
H1381 H 1.3321 1.1126 0.9784 0.0418 1.0000 Uiso R . . . . . 
H1382 H 1.4658 1.0928 0.9994 0.0418 1.0000 Uiso R . . . . . 
H1383 H 1.4627 1.1667 1.0064 0.0422 1.0000 Uiso R . . . . . 
H1391 H 1.6579 1.1470 0.9374 0.0435 1.0000 Uiso R . . . . . 
H1392 H 1.6322 1.0841 0.8707 0.0434 1.0000 Uiso R . . . . . 
H1393 H 1.6423 1.0744 0.9342 0.0428 1.0000 Uiso R . . . . . 
H1401 H 1.3207 0.9131 0.8359 0.0233 1.0000 Uiso R . . . . . 
H1411 H 1.3096 0.9156 0.9329 0.0379 1.0000 Uiso R . . . . . 
H1412 H 1.3873 0.9899 0.9697 0.0378 1.0000 Uiso R . . . . . 
H1413 H 1.2405 0.9749 0.9344 0.0364 1.0000 Uiso R . . . . . 
H1421 H 1.5529 0.9298 0.8345 0.0427 1.0000 Uiso R . . . . . 
H1422 H 1.5740 0.9655 0.9105 0.0423 1.0000 Uiso R . . . . . 
H1423 H 1.5107 0.8880 0.8729 0.0423 1.0000 Uiso R . . . . . 
H1431 H 0.8191 0.9541 0.6610 0.0295 1.0000 Uiso R . . . . . 
H1432 H 0.8630 0.9093 0.6972 0.0287 1.0000 Uiso R . . . . . 
H1441 H 0.7640 0.9663 0.7837 0.0295 1.0000 Uiso R . . . . . 
H1442 H 0.6737 0.9785 0.7308 0.0293 1.0000 Uiso R . . . . . 
H1451 H 0.8509 1.0738 0.8337 0.0288 1.0000 Uiso R . . . . . 
H1452 H 0.7678 1.0878 0.7809 0.0282 1.0000 Uiso R . . . . . 
H1461 H 1.0240 1.0940 0.7899 0.0235 1.0000 Uiso R . . . . . 
H1462 H 0.9320 1.0804 0.7243 0.0254 1.0000 Uiso R . . . . . 
H2091 H 1.3013 0.7753 0.6232 0.0210 0.256(4) Uiso R . P 1 2 . 
H2101 H 1.2616 0.8172 0.7341 0.0380 0.256(4) Uiso R . P 1 2 . 
H2102 H 1.4152 0.8276 0.7545 0.0381 0.256(4) Uiso R . P 1 2 . 
H2103 H 1.3365 0.7552 0.7109 0.0381 0.256(4) Uiso R . P 1 2 . 
H2111 H 1.5166 0.7927 0.6052 0.0529 0.256(4) Uiso R . P 1 2 . 
H2112 H 1.5692 0.8376 0.6791 0.0527 0.256(4) Uiso R . P 1 2 . 
H2113 H 1.5262 0.7609 0.6541 0.0530 0.256(4) Uiso R . P 1 2 . 
H2121 H 1.2975 0.9058 0.5701 0.0340 0.392(4) Uiso R . P 1 4 . 
H2131 H 1.1963 0.7922 0.5340 0.0571 0.392(4) Uiso R . P 1 4 . 
H2132 H 1.2734 0.8075 0.4846 0.0571 0.392(4) Uiso R . P 1 4 . 
H2133 H 1.3371 0.7734 0.5247 0.0569 0.392(4) Uiso R . P 1 4 . 
H2141 H 1.5473 0.8696 0.5821 0.0684 0.392(4) Uiso R . P 1 4 . 
H2142 H 1.4917 0.8881 0.5270 0.0702 0.392(4) Uiso R . P 1 4 . 
H2143 H 1.5183 0.9402 0.5993 0.0702 0.392(4) Uiso R . P 1 4 . 
loop_
_atom_site_aniso_label
_atom_site_aniso_U_11
_atom_site_aniso_U_22
_atom_site_aniso_U_33
_atom_site_aniso_U_23
_atom_site_aniso_U_13
_atom_site_aniso_U_12
Co1 0.01014(14) 0.01126(14) 0.01371(14) 0.00415(11) 0.00245(11) 0.00241(10) 
Co101 0.01146(14) 0.01290(14) 0.01280(14) 0.00475(11) 0.00325(11) 0.00210(11) 
Ti1 0.01041(18) 0.01080(18) 0.01251(18) 0.00322(15) 0.00201(14) 0.00244(14) 
Ti101 0.01086(18) 0.01205(18) 0.01240(18) 0.00436(15) 0.00246(14) 0.00124(14) 
P1 0.0142(3) 0.0121(3) 0.0144(3) 0.0033(2) 0.0040(2) 0.0038(2) 
P2 0.0109(3) 0.0147(3) 0.0130(3) 0.0040(2) 0.0017(2) 0.0033(2) 
P3 0.0119(3) 0.0135(3) 0.0193(3) 0.0071(2) 0.0026(2) 0.0019(2) 
P101 0.0174(3) 0.0139(3) 0.0221(3) 0.0019(2) 0.0096(2) 0.0016(2) 
P102 0.0128(3) 0.0142(3) 0.0178(3) 0.0075(2) 0.0040(2) 0.0017(2) 
P103 0.0104(3) 0.0163(3) 0.0119(3) 0.0044(2) 0.0021(2) 0.0022(2) 
O1 0.0120(7) 0.0161(8) 0.0220(8) 0.0059(6) 0.0034(6) 0.0047(6) 
O101 0.0127(7) 0.0172(8) 0.0223(8) 0.0075(7) 0.0043(6) 0.0031(6) 
N1 0.0133(9) 0.0111(9) 0.0190(9) 0.0013(7) 0.0023(7) 0.0003(7) 
N2 0.0111(9) 0.0217(9) 0.0133(9) 0.0061(8) 0.0028(7) 0.0058(7) 
N3 0.0128(9) 0.0148(9) 0.0192(9) 0.0087(8) 0.0008(7) 0.0007(7) 
N101 0.0151(9) 0.0126(9) 0.0215(10) 0.0021(8) 0.0044(8) 0.0006(7) 
N102 0.0122(9) 0.0186(9) 0.0181(9) 0.0092(8) 0.0016(7) 0.0017(7) 
N103 0.0106(9) 0.0214(9) 0.0139(9) 0.0071(8) 0.0033(7) 0.0033(7) 
C1 0.0132(10) 0.0097(10) 0.0174(11) -0.0018(8) 0.0042(8) 0.0028(8) 
C2 0.0179(11) 0.0174(11) 0.0181(11) 0.0024(9) 0.0045(9) 0.0025(9) 
C3 0.0199(12) 0.0204(12) 0.0185(11) -0.0019(9) 0.0028(9) 0.0059(9) 
C4 0.0238(13) 0.0468(17) 0.0245(13) 0.0057(12) -0.0037(11) 0.0048(12) 
C5 0.0132(11) 0.0174(11) 0.0260(13) -0.0044(10) 0.0039(9) 0.0000(9) 
C6 0.0207(12) 0.0123(10) 0.0299(13) 0.0023(10) 0.0128(10) 0.0054(9) 
C7 0.0265(14) 0.0233(13) 0.0486(17) 0.0121(12) 0.0140(12) 0.0006(10) 
C8 0.0187(11) 0.0156(11) 0.0196(11) 0.0038(9) 0.0046(9) 0.0062(9) 
C9 0.0257(12) 0.0227(12) 0.0159(11) 0.0068(9) 0.0076(9) 0.0097(9) 
C10 0.0418(16) 0.0295(14) 0.0192(12) 0.0028(11) 0.0048(11) 0.0131(12) 
C11 0.0290(14) 0.0439(16) 0.0297(14) 0.0202(12) 0.0181(11) 0.0126(12) 
C12 0.0187(11) 0.0140(10) 0.0202(11) 0.0050(9) 0.0056(9) 0.0055(8) 
C13 0.0279(13) 0.0134(11) 0.0329(14) 0.0049(10) 0.0064(11) 0.0047(9) 
C14 0.0210(12) 0.0242(12) 0.0342(14) 0.0133(11) 0.0070(10) 0.0090(10) 
C15 0.0124(11) 0.0264(12) 0.0156(11) 0.0091(9) 0.0028(8) 0.0093(9) 
C16 0.0160(11) 0.0258(12) 0.0172(11) 0.0057(10) 0.0053(9) 0.0082(9) 
C17 0.0152(11) 0.0379(14) 0.0276(13) 0.0187(11) 0.0032(10) 0.0073(10) 
C18 0.0209(13) 0.0449(17) 0.0494(18) 0.0242(14) 0.0085(12) 0.0008(12) 
C19 0.0156(12) 0.0513(16) 0.0237(13) 0.0195(12) 0.0098(10) 0.0136(11) 
C20 0.0200(12) 0.0410(15) 0.0171(12) 0.0090(11) 0.0045(9) 0.0182(11) 
C21 0.0339(16) 0.0577(19) 0.0238(14) 0.0030(13) 0.0092(12) 0.0228(14) 
C22 0.0161(11) 0.0265(12) 0.0192(11) 0.0065(10) 0.0009(9) 0.0080(9) 
C23 0.0147(11) 0.0190(11) 0.0171(11) 0.0076(9) 0.0022(9) 0.0025(8) 
C24 0.0250(13) 0.0294(13) 0.0232(12) 0.0158(11) 0.0044(10) 0.0055(10) 
C25 0.0217(12) 0.0231(12) 0.0269(13) 0.0115(10) 0.0048(10) 0.0072(9) 
C26 0.0190(11) 0.0174(11) 0.0155(11) 0.0036(9) -0.0003(9) 0.0032(9) 
C27 0.0235(13) 0.0341(14) 0.0179(12) 0.0009(11) 0.0016(10) 0.0063(10) 
C28 0.0176(12) 0.0272(13) 0.0232(12) 0.0049(10) -0.0009(10) -0.0019(9) 
C29 0.0132(10) 0.0205(11) 0.0187(11) 0.0095(9) 0.0048(8) 0.0061(8) 
C30 0.0135(10) 0.0188(11) 0.0229(12) 0.0089(9) 0.0013(9) 0.0015(8) 
C31 0.0208(12) 0.0227(12) 0.0302(13) 0.0147(10) 0.0078(10) 0.0090(9) 
C32 0.0276(14) 0.0253(13) 0.0522(17) 0.0209(13) 0.0017(12) 0.0101(11) 
C33 0.0183(12) 0.0312(13) 0.0277(13) 0.0184(11) 0.0035(10) 0.0091(10) 
C34 0.0173(11) 0.0286(13) 0.0184(11) 0.0094(10) 0.0016(9) 0.0032(9) 
C35 0.0265(14) 0.0366(15) 0.0267(13) 0.0099(12) -0.0083(11) 0.0035(11) 
C36 0.0190(11) 0.0171(11) 0.0175(11) 0.0052(9) 0.0023(9) 0.0032(9) 
C37 0.0176(11) 0.0133(10) 0.0227(12) 0.0067(9) -0.0017(9) 0.0007(8) 
C38 0.0217(12) 0.0168(11) 0.0233(12) 0.0032(10) 0.0008(10) 0.0039(9) 
C39 0.0198(12) 0.0206(12) 0.0324(14) 0.0123(11) -0.0050(10) -0.0011(9) 
C40 0.0279(13) 0.0181(11) 0.0304(13) 0.0131(10) 0.0115(10) 0.0057(10) 
C41 0.0321(15) 0.0444(16) 0.0240(13) 0.0166(12) 0.0061(11) 0.0031(12) 
C42 0.0296(15) 0.0564(19) 0.0340(16) 0.0077(14) 0.0137(12) -0.0113(13) 
C43 0.0143(11) 0.0247(12) 0.0293(13) 0.0053(10) 0.0020(10) 0.0012(9) 
C44 0.0141(11) 0.0319(14) 0.0340(14) 0.0118(11) 0.0040(10) 0.0040(10) 
C45 0.0167(12) 0.0287(13) 0.0276(13) 0.0088(11) 0.0064(10) 0.0064(10) 
C46 0.0173(11) 0.0159(11) 0.0270(12) 0.0055(10) 0.0065(9) 0.0051(9) 
C101 0.0169(11) 0.0121(10) 0.0191(11) -0.0017(9) 0.0062(9) 0.0015(8) 
C102 0.0223(12) 0.0167(11) 0.0218(12) 0.0030(9) 0.0067(10) 0.0031(9) 
C103 0.0250(13) 0.0134(11) 0.0320(14) 0.0014(10) 0.0153(11) 0.0017(9) 
C104 0.0332(15) 0.0284(14) 0.0421(16) 0.0140(12) 0.0141(12) -0.0018(11) 
C105 0.0190(12) 0.0160(11) 0.0290(13) -0.0019(10) 0.0075(10) -0.0025(9) 
C106 0.0243(13) 0.0199(12) 0.0229(13) -0.0040(10) 0.0043(10) 0.0014(10) 
C107 0.0356(16) 0.0391(16) 0.0299(15) 0.0048(13) -0.0055(12) -0.0047(12) 
C108 0.0261(13) 0.0193(12) 0.0200(12) 0.0016(10) 0.0080(10) 0.0012(9) 
C115 0.0142(10) 0.0237(11) 0.0174(11) 0.0115(9) 0.0059(9) 0.0047(9) 
C116 0.0166(11) 0.0227(11) 0.0188(11) 0.0104(9) 0.0053(9) 0.0007(9) 
C117 0.0161(11) 0.0351(14) 0.0154(11) 0.0100(10) 0.0052(9) 0.0020(10) 
C118 0.0196(12) 0.0422(15) 0.0215(12) 0.0100(11) 0.0019(10) 0.0018(11) 
C119 0.0161(11) 0.0414(15) 0.0255(13) 0.0186(11) 0.0042(10) 0.0095(10) 
C120 0.0210(12) 0.0304(13) 0.0283(13) 0.0190(11) 0.0106(10) 0.0109(10) 
C121 0.0316(14) 0.0379(15) 0.0444(16) 0.0267(13) 0.0079(12) 0.0154(12) 
C122 0.0154(11) 0.0227(12) 0.0215(12) 0.0111(10) 0.0044(9) 0.0025(9) 
C123 0.0216(12) 0.0216(12) 0.0239(12) 0.0117(10) 0.0083(10) 0.0033(9) 
C124 0.0365(15) 0.0263(13) 0.0263(13) 0.0145(11) 0.0108(11) 0.0058(11) 
C125 0.0443(19) 0.128(3) 0.084(3) 0.088(3) 0.0453(19) 0.052(2) 
C126 0.0194(11) 0.0139(10) 0.0254(12) 0.0087(9) 0.0020(9) 0.0021(8) 
C127 0.0303(13) 0.0199(12) 0.0213(12) 0.0053(10) 0.0041(10) 0.0068(10) 
C128 0.0236(13) 0.0198(12) 0.0464(16) 0.0131(12) -0.0077(12) -0.0032(10) 
C129 0.0107(10) 0.0206(11) 0.0107(10) 0.0055(8) 0.0024(8) 0.0051(8) 
C130 0.0156(11) 0.0181(11) 0.0164(11) 0.0049(9) 0.0010(9) 0.0013(8) 
C131 0.0176(11) 0.0265(12) 0.0150(11) 0.0042(9) 0.0016(9) 0.0088(9) 
C132 0.0312(15) 0.0360(15) 0.0279(14) -0.0014(12) 0.0087(12) 0.0128(12) 
C133 0.0157(11) 0.0398(14) 0.0176(11) 0.0141(11) 0.0076(9) 0.0101(10) 
C134 0.0137(11) 0.0264(12) 0.0251(12) 0.0147(10) 0.0039(9) 0.0034(9) 
C135 0.0203(13) 0.0332(14) 0.0465(16) 0.0235(13) 0.0087(12) 0.0011(10) 
C136 0.0168(11) 0.0181(11) 0.0182(11) 0.0066(9) 0.0032(9) 0.0058(9) 
C137 0.0173(11) 0.0183(11) 0.0159(11) 0.0045(9) 0.0006(9) 0.0032(9) 
C138 0.0230(13) 0.0321(14) 0.0184(12) 0.0010(10) 0.0021(10) 0.0038(10) 
C139 0.0174(12) 0.0333(14) 0.0269(13) 0.0052(11) 0.0009(10) -0.0028(10) 
C140 0.0198(11) 0.0206(11) 0.0154(11) 0.0071(9) 0.0015(9) 0.0024(9) 
C141 0.0222(12) 0.0373(14) 0.0224(12) 0.0177(11) 0.0051(10) 0.0060(10) 
C142 0.0295(14) 0.0405(15) 0.0305(14) 0.0228(12) 0.0106(11) 0.0180(11) 
C143 0.0143(11) 0.0229(12) 0.0303(13) 0.0096(10) 0.0020(10) -0.0001(9) 
C144 0.0159(11) 0.0308(13) 0.0289(13) 0.0166(11) 0.0054(10) 0.0039(10) 
C145 0.0159(11) 0.0303(13) 0.0252(12) 0.0100(11) 0.0048(10) 0.0079(10) 
C146 0.0201(12) 0.0196(11) 0.0264(12) 0.0107(10) 0.0063(10) 0.0067(9) 

_refine_ls_extinction_method 
    'None'
_oxford_refine_ls_scale 0.072066(7) 
loop_
 _geom_bond_atom_site_label_1
 _geom_bond_site_symmetry_1
 _geom_bond_atom_site_label_2
 _geom_bond_site_symmetry_2
 _geom_bond_distance
 _geom_bond_publ_flag
Co1 . Ti1 . 2.0252(5)    yes
Co1 . P1 . 2.2469(6)    yes
Co1 . P2 . 2.2363(6)    yes
Co1 . P3 . 2.2402(6)    yes
Co101 . Ti101 . 2.0271(5)    yes
Co101 . P101 . 2.2411(6)    yes
Co101 . P102 . 2.2324(6)    yes
Co101 . P103 . 2.2327(6)    yes
Ti1 . P1 . 2.7157(7)    yes
Ti1 . P2 . 2.7541(7)    yes
Ti1 . P3 . 2.7419(7)    yes
Ti1 . O1 . 2.3398(15)    yes
Ti1 . N1 . 2.0146(17)    yes
Ti1 . N2 . 2.0413(17)    yes
Ti1 . N3 . 2.0383(17)    yes
Ti101 . P101 . 2.7299(7)    yes
Ti101 . P102 . 2.7245(7)    yes
Ti101 . P103 . 2.7465(7)    yes
Ti101 . O101 . 2.3354(15)    yes
Ti101 . N101 . 2.0028(18)    yes
Ti101 . N102 . 2.0373(18)    yes
Ti101 . N103 . 2.0347(17)    yes
P1 . N1 . 1.6772(18)    yes
P1 . C9 . 1.864(2)    yes
P1 . C12 . 1.865(2)    yes
P2 . N2 . 1.6702(18)    yes
P2 . C23 . 1.865(2)    yes
P2 . C26 . 1.869(2)    yes
P3 . N3 . 1.6749(18)    yes
P3 . C37 . 1.883(2)    yes
P3 . C40 . 1.862(2)    yes
P101 . N101 . 1.6781(19)    yes
P101 . C109 . 1.920(3)    yes
P101 . N101 . 1.6781(19)    yes
P101 . C209 . 1.740(8)    yes
P101 . N101 . 1.6781(19)    yes
P101 . C112 . 1.818(4)    yes
P101 . N101 . 1.6781(19)    yes
P101 . C212 . 1.987(7)    yes
P102 . N102 . 1.6727(18)    yes
P102 . C123 . 1.862(2)    yes
P102 . C126 . 1.870(2)    yes
P103 . N103 . 1.6688(18)    yes
P103 . C137 . 1.868(2)    yes
P103 . C140 . 1.862(2)    yes
O1 . C43 . 1.440(3)    yes
O1 . C46 . 1.455(2)    yes
O101 . C143 . 1.444(2)    yes
O101 . C146 . 1.449(2)    yes
N1 . C1 . 1.415(3)    yes
N2 . C15 . 1.414(3)    yes
N3 . C29 . 1.400(3)    yes
N101 . C101 . 1.416(3)    yes
N102 . C115 . 1.400(3)    yes
N103 . C129 . 1.415(3)    yes
C1 . C2 . 1.394(3)    yes
C1 . C8 . 1.393(3)    yes
C2 . C3 . 1.392(3)    yes
C2 . H21 . 0.937    no
C3 . C4 . 1.507(3)    yes
C3 . C5 . 1.392(3)    yes
C4 . H41 . 0.938    no
C4 . H42 . 0.930    no
C4 . H43 . 0.925    no
C5 . C6 . 1.384(3)    yes
C5 . H51 . 0.953    no
C6 . C7 . 1.511(3)    yes
C6 . C8 . 1.393(3)    yes
C7 . H71 . 0.960    no
C7 . H72 . 0.950    no
C7 . H73 . 0.968    no
C8 . H81 . 0.953    no
C9 . C10 . 1.525(3)    yes
C9 . C11 . 1.534(3)    yes
C9 . H91 . 0.972    no
C10 . H101 . 0.958    no
C10 . H102 . 0.965    no
C10 . H103 . 0.965    no
C11 . H111 . 0.956    no
C11 . H112 . 0.977    no
C11 . H113 . 0.973    no
C12 . C13 . 1.528(3)    yes
C12 . C14 . 1.533(3)    yes
C12 . H121 . 0.976    no
C13 . H131 . 0.956    no
C13 . H132 . 0.961    no
C13 . H133 . 0.958    no
C14 . H141 . 0.957    no
C14 . H142 . 0.979    no
C14 . H143 . 0.952    no
C15 . C16 . 1.392(3)    yes
C15 . C22 . 1.398(3)    yes
C16 . C17 . 1.395(3)    yes
C16 . H161 . 0.929    no
C17 . C18 . 1.507(3)    yes
C17 . C19 . 1.382(3)    yes
C18 . H181 . 0.962    no
C18 . H182 . 0.956    no
C18 . H183 . 0.968    no
C19 . C20 . 1.386(4)    yes
C19 . H191 . 0.930    no
C20 . C21 . 1.509(3)    yes
C20 . C22 . 1.386(3)    yes
C21 . H211 . 0.949    no
C21 . H212 . 0.955    no
C21 . H213 . 0.943    no
C22 . H221 . 0.950    no
C23 . C24 . 1.534(3)    yes
C23 . C25 . 1.531(3)    yes
C23 . H231 . 0.982    no
C24 . H241 . 0.953    no
C24 . H242 . 0.950    no
C24 . H243 . 0.953    no
C25 . H251 . 0.966    no
C25 . H252 . 0.947    no
C25 . H253 . 0.974    no
C26 . C27 . 1.529(3)    yes
C26 . C28 . 1.526(3)    yes
C26 . H261 . 0.958    no
C27 . H271 . 0.971    no
C27 . H272 . 0.961    no
C27 . H273 . 0.966    no
C28 . H281 . 0.954    no
C28 . H282 . 0.958    no
C28 . H283 . 0.967    no
C29 . C30 . 1.403(3)    yes
C29 . C36 . 1.400(3)    yes
C30 . C31 . 1.389(3)    yes
C30 . H301 . 0.935    no
C31 . C32 . 1.505(3)    yes
C31 . C33 . 1.392(3)    yes
C32 . H321 . 0.961    no
C32 . H322 . 0.951    no
C32 . H323 . 0.953    no
C33 . C34 . 1.391(3)    yes
C33 . H331 . 0.928    no
C34 . C35 . 1.509(3)    yes
C34 . C36 . 1.385(3)    yes
C35 . H351 . 0.948    no
C35 . H352 . 0.926    no
C35 . H353 . 0.946    no
C36 . H361 . 0.925    no
C37 . C38 . 1.526(3)    yes
C37 . C39 . 1.529(3)    yes
C37 . H371 . 0.975    no
C38 . H381 . 0.963    no
C38 . H382 . 0.958    no
C38 . H383 . 0.961    no
C39 . H391 . 0.962    no
C39 . H392 . 0.964    no
C39 . H393 . 0.968    no
C40 . C41 . 1.514(3)    yes
C40 . C42 . 1.521(3)    yes
C40 . H401 . 0.980    no
C41 . H411 . 0.971    no
C41 . H412 . 0.975    no
C41 . H413 . 0.952    no
C42 . H421 . 0.963    no
C42 . H422 . 0.958    no
C42 . H423 . 0.962    no
C43 . C44 . 1.521(3)    yes
C43 . H431 . 0.963    no
C43 . H432 . 0.992    no
C44 . C45 . 1.521(3)    yes
C44 . H441 . 0.984    no
C44 . H442 . 0.968    no
C45 . C46 . 1.519(3)    yes
C45 . H451 . 0.966    no
C45 . H452 . 0.967    no
C46 . H461 . 0.958    no
C46 . H462 . 0.965    no
C101 . C102 . 1.396(3)    yes
C101 . C108 . 1.389(3)    yes
C102 . C103 . 1.391(3)    yes
C102 . H1021 . 0.942    no
C103 . C104 . 1.505(3)    yes
C103 . C105 . 1.385(4)    yes
C104 . H1041 . 0.950    no
C104 . H1042 . 0.949    no
C104 . H1043 . 0.946    no
C105 . C106 . 1.389(3)    yes
C105 . H1051 . 0.938    no
C106 . C107 . 1.506(4)    yes
C106 . C108 . 1.393(3)    yes
C107 . H1071 . 0.956    no
C107 . H1072 . 0.953    no
C107 . H1073 . 0.962    no
C108 . H1081 . 0.938    no
C109 . C110 . 1.527(4)    yes
C109 . C111 . 1.528(4)    yes
C109 . H1091 . 0.984    no
C110 . H1101 . 0.958    no
C110 . H1102 . 0.956    no
C110 . H1103 . 0.957    no
C111 . H1111 . 0.973    no
C111 . H1112 . 0.942    no
C111 . H1113 . 0.965    no
C112 . C113 . 1.517(6)    yes
C112 . C114 . 1.499(6)    yes
C112 . H1121 . 0.997    no
C113 . H1131 . 0.952    no
C113 . H1132 . 0.953    no
C113 . H1133 . 0.954    no
C114 . H1141 . 0.972    no
C114 . H1142 . 0.976    no
C114 . H1143 . 0.980    no
C115 . C116 . 1.403(3)    yes
C115 . C122 . 1.400(3)    yes
C116 . C117 . 1.382(3)    yes
C116 . H1161 . 0.928    no
C117 . C118 . 1.509(3)    yes
C117 . C119 . 1.394(3)    yes
C118 . H1181 . 0.959    no
C118 . H1182 . 0.960    no
C118 . H1183 . 0.965    no
C119 . C120 . 1.392(3)    yes
C119 . H1191 . 0.961    no
C120 . C121 . 1.510(3)    yes
C120 . C122 . 1.392(3)    yes
C121 . H1211 . 0.943    no
C121 . H1212 . 0.952    no
C121 . H1213 . 0.957    no
C122 . H1221 . 0.926    no
C123 . C124 . 1.512(3)    yes
C123 . C125 . 1.532(4)    yes
C123 . H1231 . 0.969    no
C124 . H1241 . 0.959    no
C124 . H1242 . 0.990    no
C124 . H1243 . 0.967    no
C125 . H1251 . 0.956    no
C125 . H1252 . 0.952    no
C125 . H1253 . 0.975    no
C126 . C127 . 1.530(3)    yes
C126 . C128 . 1.529(3)    yes
C126 . H1261 . 0.979    no
C127 . H1271 . 0.962    no
C127 . H1272 . 0.969    no
C127 . H1273 . 0.955    no
C128 . H1281 . 0.957    no
C128 . H1282 . 0.960    no
C128 . H1283 . 0.973    no
C129 . C130 . 1.390(3)    yes
C129 . C136 . 1.395(3)    yes
C130 . C131 . 1.387(3)    yes
C130 . H1301 . 0.940    no
C131 . C132 . 1.504(3)    yes
C131 . C133 . 1.393(3)    yes
C132 . H1321 . 0.951    no
C132 . H1322 . 0.954    no
C132 . H1323 . 0.950    no
C133 . C134 . 1.395(3)    yes
C133 . H1331 . 0.934    no
C134 . C135 . 1.508(3)    yes
C134 . C136 . 1.384(3)    yes
C135 . H1351 . 0.952    no
C135 . H1352 . 0.955    no
C135 . H1353 . 0.970    no
C136 . H1361 . 0.940    no
C137 . C138 . 1.531(3)    yes
C137 . C139 . 1.526(3)    yes
C137 . H1371 . 0.969    no
C138 . H1381 . 0.965    no
C138 . H1382 . 0.985    no
C138 . H1383 . 0.982    no
C139 . H1391 . 0.975    no
C139 . H1392 . 0.956    no
C139 . H1393 . 0.974    no
C140 . C141 . 1.527(3)    yes
C140 . C142 . 1.524(3)    yes
C140 . H1401 . 0.959    no
C141 . H1411 . 0.964    no
C141 . H1412 . 0.967    no
C141 . H1413 . 0.967    no
C142 . H1421 . 0.971    no
C142 . H1422 . 0.967    no
C142 . H1423 . 0.984    no
C143 . C144 . 1.523(3)    yes
C143 . H1431 . 0.988    no
C143 . H1432 . 0.977    no
C144 . C145 . 1.533(3)    yes
C144 . H1441 . 0.969    no
C144 . H1442 . 0.974    no
C145 . C146 . 1.519(3)    yes
C145 . H1451 . 0.960    no
C145 . H1452 . 0.968    no
C146 . H1461 . 0.963    no
C146 . H1462 . 0.982    no
C209 . C210 . 1.495(13)    yes
C209 . C211 . 1.549(13)    yes
C209 . H2091 . 0.991    no
C210 . H2101 . 0.965    no
C210 . H2102 . 0.959    no
C210 . H2103 . 0.966    no
C211 . H2111 . 0.961    no
C211 . H2112 . 0.955    no
C211 . H2113 . 0.963    no
C212 . C213 . 1.529(10)    yes
C212 . C214 . 1.526(10)    yes
C212 . H2121 . 0.983    no
C213 . H2131 . 0.961    no
C213 . H2132 . 0.955    no
C213 . H2133 . 0.953    no
C214 . H2141 . 0.946    no
C214 . H2142 . 0.958    no
C214 . H2143 . 0.952    no
loop_
 _geom_angle_atom_site_label_1
 _geom_angle_site_symmetry_1
 _geom_angle_atom_site_label_2
 _geom_angle_site_symmetry_2
 _geom_angle_atom_site_label_3
 _geom_angle_site_symmetry_3
 _geom_angle
 _geom_angle_publ_flag
Ti1 . Co1 . P1 . 78.75(2)    yes
Ti1 . Co1 . P2 . 80.36(2)    yes
P1 . Co1 . P2 . 113.36(2)    yes
Ti1 . Co1 . P3 . 79.83(2)    yes
P1 . Co1 . P3 . 120.53(2)    yes
P2 . Co1 . P3 . 116.60(2)    yes
Ti101 . Co101 . P101 . 79.35(2)    yes
Ti101 . Co101 . P102 . 79.37(2)    yes
P101 . Co101 . P102 . 117.97(3)    yes
Ti101 . Co101 . P103 . 80.13(2)    yes
P101 . Co101 . P103 . 114.77(2)    yes
P102 . Co101 . P103 . 117.72(2)    yes
Co1 . Ti1 . P1 . 54.242(17)    yes
Co1 . Ti1 . P2 . 53.180(16)    yes
P1 . Ti1 . P2 . 86.45(2)    yes
Co1 . Ti1 . P3 . 53.534(16)    yes
P1 . Ti1 . P3 . 91.11(2)    yes
P2 . Ti1 . P3 . 87.74(2)    yes
Co1 . Ti1 . O1 . 170.47(4)    yes
P1 . Ti1 . O1 . 135.22(4)    yes
P2 . Ti1 . O1 . 121.27(4)    yes
P3 . Ti1 . O1 . 121.62(4)    yes
Co1 . Ti1 . N1 . 92.11(5)    yes
P1 . Ti1 . N1 . 38.01(5)    yes
P2 . Ti1 . N1 . 109.36(5)    yes
P3 . Ti1 . N1 . 120.94(5)    yes
O1 . Ti1 . N1 . 97.28(6)    yes
Co1 . Ti1 . N2 . 89.79(5)    yes
P1 . Ti1 . N2 . 116.20(5)    yes
P2 . Ti1 . N2 . 37.15(5)    yes
P3 . Ti1 . N2 . 107.94(5)    yes
O1 . Ti1 . N2 . 84.14(6)    yes
Co1 . Ti1 . N3 . 90.22(5)    yes
P1 . Ti1 . N3 . 110.82(5)    yes
P2 . Ti1 . N3 . 119.57(5)    yes
P3 . Ti1 . N3 . 37.50(5)    yes
O1 . Ti1 . N3 . 86.65(6)    yes
N1 . Ti1 . N2 . 119.53(7)    yes
N1 . Ti1 . N3 . 119.35(7)    yes
N2 . Ti1 . N3 . 121.07(7)    yes
Co101 . Ti101 . P101 . 53.785(17)    yes
Co101 . Ti101 . P102 . 53.639(17)    yes
P101 . Ti101 . P102 . 89.32(2)    yes
Co101 . Ti101 . P103 . 53.219(16)    yes
P101 . Ti101 . P103 . 86.96(2)    yes
P102 . Ti101 . P103 . 88.62(2)    yes
Co101 . Ti101 . O101 . 171.98(4)    yes
P101 . Ti101 . O101 . 134.15(4)    yes
P102 . Ti101 . O101 . 122.87(4)    yes
P103 . Ti101 . O101 . 121.83(4)    yes
Co101 . Ti101 . N101 . 91.24(5)    yes
P101 . Ti101 . N101 . 37.74(5)    yes
P102 . Ti101 . N101 . 119.36(6)    yes
P103 . Ti101 . N101 . 108.83(6)    yes
O101 . Ti101 . N101 . 96.58(6)    yes
Co101 . Ti101 . N102 . 90.56(5)    yes
P101 . Ti101 . N102 . 108.59(5)    yes
P102 . Ti101 . N102 . 37.77(5)    yes
P103 . Ti101 . N102 . 120.96(5)    yes
O101 . Ti101 . N102 . 87.42(6)    yes
Co101 . Ti101 . N103 . 90.00(5)    yes
P101 . Ti101 . N103 . 116.82(5)    yes
P102 . Ti101 . N103 . 109.58(5)    yes
P103 . Ti101 . N103 . 37.24(5)    yes
O101 . Ti101 . N103 . 84.63(6)    yes
N101 . Ti101 . N102 . 117.78(8)    yes
N101 . Ti101 . N103 . 119.03(8)    yes
N102 . Ti101 . N103 . 123.16(7)    yes
Ti1 . P1 . Co1 . 47.005(15)    yes
Ti1 . P1 . N1 . 47.71(6)    yes
Co1 . P1 . N1 . 94.56(6)    yes
Ti1 . P1 . C9 . 122.48(7)    yes
Co1 . P1 . C9 . 119.78(8)    yes
N1 . P1 . C9 . 106.98(10)    yes
Ti1 . P1 . C12 . 128.84(7)    yes
Co1 . P1 . C12 . 117.71(7)    yes
N1 . P1 . C12 . 109.02(9)    yes
C9 . P1 . C12 . 107.16(10)    yes
Ti1 . P2 . Co1 . 46.465(15)    yes
Ti1 . P2 . N2 . 47.56(6)    yes
Co1 . P2 . N2 . 93.43(6)    yes
Ti1 . P2 . C23 . 118.04(7)    yes
Co1 . P2 . C23 . 119.53(7)    yes
N2 . P2 . C23 . 105.74(9)    yes
Ti1 . P2 . C26 . 134.13(7)    yes
Co1 . P2 . C26 . 118.73(7)    yes
N2 . P2 . C26 . 111.41(9)    yes
C23 . P2 . C26 . 106.46(10)    yes
Ti1 . P3 . Co1 . 46.636(15)    yes
Ti1 . P3 . N3 . 47.81(6)    yes
Co1 . P3 . N3 . 93.54(6)    yes
Ti1 . P3 . C37 . 118.80(7)    yes
Co1 . P3 . C37 . 120.24(7)    yes
N3 . P3 . C37 . 107.59(9)    yes
Ti1 . P3 . C40 . 137.82(8)    yes
Co1 . P3 . C40 . 127.53(8)    yes
N3 . P3 . C40 . 106.36(10)    yes
C37 . P3 . C40 . 99.46(10)    yes
Ti101 . P101 . Co101 . 46.866(15)    yes
Ti101 . P101 . N101 . 46.92(6)    yes
Co101 . P101 . N101 . 93.48(6)    yes
Ti101 . P101 . C109 . 127.09(10)    yes
Co101 . P101 . C109 . 116.20(11)    yes
N101 . P101 . C109 . 107.49(11)    yes
Ti101 . P101 . Co101 . 46.866(15)    yes
Ti101 . P101 . N101 . 46.92(6)    yes
Co101 . P101 . N101 . 93.48(6)    yes
Ti101 . P101 . C209 . 142.0(3)    yes
Co101 . P101 . C209 . 138.5(3)    yes
N101 . P101 . C209 . 105.9(3)    yes
Ti101 . P101 . Co101 . 46.866(15)    yes
Ti101 . P101 . N101 . 46.92(6)    yes
Co101 . P101 . N101 . 93.48(6)    yes
Ti101 . P101 . C112 . 129.80(14)    yes
Co101 . P101 . C112 . 130.57(14)    yes
N101 . P101 . C112 . 107.45(14)    yes
Ti101 . P101 . Co101 . 46.866(15)    yes
Ti101 . P101 . N101 . 46.92(6)    yes
Co101 . P101 . N101 . 93.48(6)    yes
Ti101 . P101 . C212 . 111.6(2)    yes
Co101 . P101 . C212 . 113.9(2)    yes
N101 . P101 . C212 . 101.1(2)    yes
Ti101 . P102 . Co101 . 46.992(15)    yes
Ti101 . P102 . N102 . 48.24(6)    yes
Co101 . P102 . N102 . 94.29(6)    yes
Ti101 . P102 . C123 . 133.26(8)    yes
Co101 . P102 . C123 . 118.58(7)    yes
N102 . P102 . C123 . 108.27(10)    yes
Ti101 . P102 . C126 . 121.16(7)    yes
Co101 . P102 . C126 . 123.06(8)    yes
N102 . P102 . C126 . 107.56(9)    yes
C123 . P102 . C126 . 103.55(10)    yes
Ti101 . P103 . Co101 . 46.650(15)    yes
Ti101 . P103 . N103 . 47.54(6)    yes
Co101 . P103 . N103 . 93.69(6)    yes
Ti101 . P103 . C137 . 132.78(7)    yes
Co101 . P103 . C137 . 118.44(7)    yes
N103 . P103 . C137 . 110.54(9)    yes
Ti101 . P103 . C140 . 118.65(7)    yes
Co101 . P103 . C140 . 119.18(7)    yes
N103 . P103 . C140 . 106.18(10)    yes
C137 . P103 . C140 . 107.17(10)    yes
Ti1 . O1 . C43 . 138.13(13)    yes
Ti1 . O1 . C46 . 116.03(12)    yes
C43 . O1 . C46 . 105.70(16)    yes
Ti101 . O101 . C143 . 139.07(13)    yes
Ti101 . O101 . C146 . 115.64(12)    yes
C143 . O101 . C146 . 105.05(16)    yes
P1 . N1 . Ti1 . 94.27(8)    yes
P1 . N1 . C1 . 134.18(14)    yes
Ti1 . N1 . C1 . 131.55(14)    yes
P2 . N2 . Ti1 . 95.29(8)    yes
P2 . N2 . C15 . 127.97(14)    yes
Ti1 . N2 . C15 . 131.18(14)    yes
P3 . N3 . Ti1 . 94.69(8)    yes
P3 . N3 . C29 . 130.62(14)    yes
Ti1 . N3 . C29 . 134.58(14)    yes
P101 . N101 . Ti101 . 95.34(8)    yes
P101 . N101 . C101 . 133.33(15)    yes
Ti101 . N101 . C101 . 131.33(14)    yes
P102 . N102 . Ti101 . 93.99(8)    yes
P102 . N102 . C115 . 131.80(15)    yes
Ti101 . N102 . C115 . 134.15(14)    yes
P103 . N103 . Ti101 . 95.22(8)    yes
P103 . N103 . C129 . 128.96(14)    yes
Ti101 . N103 . C129 . 132.70(13)    yes
N1 . C1 . C2 . 121.00(19)    yes
N1 . C1 . C8 . 120.3(2)    yes
C2 . C1 . C8 . 118.4(2)    yes
C1 . C2 . C3 . 121.3(2)    yes
C1 . C2 . H21 . 119.1    no
C3 . C2 . H21 . 119.6    no
C2 . C3 . C4 . 120.5(2)    yes
C2 . C3 . C5 . 118.6(2)    yes
C4 . C3 . C5 . 120.9(2)    yes
C3 . C4 . H41 . 112.2    no
C3 . C4 . H42 . 112.3    no
H41 . C4 . H42 . 107.5    no
C3 . C4 . H43 . 110.0    no
H41 . C4 . H43 . 108.2    no
H42 . C4 . H43 . 106.4    no
C3 . C5 . C6 . 121.5(2)    yes
C3 . C5 . H51 . 119.2    no
C6 . C5 . H51 . 119.3    no
C5 . C6 . C7 . 121.2(2)    yes
C5 . C6 . C8 . 118.8(2)    yes
C7 . C6 . C8 . 120.1(2)    yes
C6 . C7 . H71 . 112.7    no
C6 . C7 . H72 . 109.4    no
H71 . C7 . H72 . 107.2    no
C6 . C7 . H73 . 112.5    no
H71 . C7 . H73 . 107.1    no
H72 . C7 . H73 . 107.7    no
C6 . C8 . C1 . 121.4(2)    yes
C6 . C8 . H81 . 120.0    no
C1 . C8 . H81 . 118.7    no
P1 . C9 . C10 . 118.86(17)    yes
P1 . C9 . C11 . 111.36(16)    yes
C10 . C9 . C11 . 110.58(19)    yes
P1 . C9 . H91 . 102.2    no
C10 . C9 . H91 . 106.3    no
C11 . C9 . H91 . 106.4    no
C9 . C10 . H101 . 109.8    no
C9 . C10 . H102 . 110.3    no
H101 . C10 . H102 . 108.6    no
C9 . C10 . H103 . 111.6    no
H101 . C10 . H103 . 107.9    no
H102 . C10 . H103 . 108.5    no
C9 . C11 . H111 . 109.5    no
C9 . C11 . H112 . 109.9    no
H111 . C11 . H112 . 108.3    no
C9 . C11 . H113 . 110.1    no
H111 . C11 . H113 . 110.9    no
H112 . C11 . H113 . 108.2    no
P1 . C12 . C13 . 119.81(16)    yes
P1 . C12 . C14 . 110.93(15)    yes
C13 . C12 . C14 . 109.68(18)    yes
P1 . C12 . H121 . 102.3    no
C13 . C12 . H121 . 106.2    no
C14 . C12 . H121 . 106.8    no
C12 . C13 . H131 . 111.5    no
C12 . C13 . H132 . 109.3    no
H131 . C13 . H132 . 108.3    no
C12 . C13 . H133 . 111.6    no
H131 . C13 . H133 . 107.7    no
H132 . C13 . H133 . 108.3    no
C12 . C14 . H141 . 108.4    no
C12 . C14 . H142 . 109.2    no
H141 . C14 . H142 . 111.4    no
C12 . C14 . H143 . 110.2    no
H141 . C14 . H143 . 108.5    no
H142 . C14 . H143 . 109.2    no
N2 . C15 . C16 . 120.12(19)    yes
N2 . C15 . C22 . 121.4(2)    yes
C16 . C15 . C22 . 118.4(2)    yes
C15 . C16 . C17 . 121.2(2)    yes
C15 . C16 . H161 . 118.7    no
C17 . C16 . H161 . 120.1    no
C16 . C17 . C18 . 119.5(2)    yes
C16 . C17 . C19 . 118.8(2)    yes
C18 . C17 . C19 . 121.7(2)    yes
C17 . C18 . H181 . 111.4    no
C17 . C18 . H182 . 108.0    no
H181 . C18 . H182 . 110.4    no
C17 . C18 . H183 . 110.1    no
H181 . C18 . H183 . 109.6    no
H182 . C18 . H183 . 107.1    no
C17 . C19 . C20 . 121.4(2)    yes
C17 . C19 . H191 . 118.7    no
C20 . C19 . H191 . 119.8    no
C19 . C20 . C21 . 120.4(2)    yes
C19 . C20 . C22 . 119.1(2)    yes
C21 . C20 . C22 . 120.4(2)    yes
C20 . C21 . H211 . 110.7    no
C20 . C21 . H212 . 111.1    no
H211 . C21 . H212 . 108.8    no
C20 . C21 . H213 . 110.0    no
H211 . C21 . H213 . 108.8    no
H212 . C21 . H213 . 107.3    no
C15 . C22 . C20 . 121.0(2)    yes
C15 . C22 . H221 . 118.2    no
C20 . C22 . H221 . 120.8    no
P2 . C23 . C24 . 118.38(15)    yes
P2 . C23 . C25 . 112.43(15)    yes
C24 . C23 . C25 . 109.85(18)    yes
P2 . C23 . H231 . 101.8    no
C24 . C23 . H231 . 105.0    no
C25 . C23 . H231 . 108.3    no
C23 . C24 . H241 . 109.7    no
C23 . C24 . H242 . 108.9    no
H241 . C24 . H242 . 109.5    no
C23 . C24 . H243 . 111.4    no
H241 . C24 . H243 . 108.2    no
H242 . C24 . H243 . 109.1    no
C23 . C25 . H251 . 109.2    no
C23 . C25 . H252 . 110.1    no
H251 . C25 . H252 . 109.3    no
C23 . C25 . H253 . 111.0    no
H251 . C25 . H253 . 107.7    no
H252 . C25 . H253 . 109.5    no
P2 . C26 . C27 . 121.47(16)    yes
P2 . C26 . C28 . 109.08(15)    yes
C27 . C26 . C28 . 109.83(18)    yes
P2 . C26 . H261 . 102.8    no
C27 . C26 . H261 . 105.9    no
C28 . C26 . H261 . 106.5    no
C26 . C27 . H271 . 110.1    no
C26 . C27 . H272 . 112.9    no
H271 . C27 . H272 . 108.8    no
C26 . C27 . H273 . 110.3    no
H271 . C27 . H273 . 107.5    no
H272 . C27 . H273 . 107.0    no
C26 . C28 . H281 . 111.5    no
C26 . C28 . H282 . 109.8    no
H281 . C28 . H282 . 108.1    no
C26 . C28 . H283 . 111.7    no
H281 . C28 . H283 . 107.8    no
H282 . C28 . H283 . 107.8    no
N3 . C29 . C30 . 124.21(19)    yes
N3 . C29 . C36 . 118.19(19)    yes
C30 . C29 . C36 . 117.54(19)    yes
C29 . C30 . C31 . 121.5(2)    yes
C29 . C30 . H301 . 118.7    no
C31 . C30 . H301 . 119.9    no
C30 . C31 . C32 . 120.8(2)    yes
C30 . C31 . C33 . 119.1(2)    yes
C32 . C31 . C33 . 120.1(2)    yes
C31 . C32 . H321 . 112.3    no
C31 . C32 . H322 . 110.1    no
H321 . C32 . H322 . 109.2    no
C31 . C32 . H323 . 110.2    no
H321 . C32 . H323 . 106.8    no
H322 . C32 . H323 . 108.1    no
C31 . C33 . C34 . 121.0(2)    yes
C31 . C33 . H331 . 120.1    no
C34 . C33 . H331 . 118.9    no
C33 . C34 . C35 . 120.9(2)    yes
C33 . C34 . C36 . 118.9(2)    yes
C35 . C34 . C36 . 120.3(2)    yes
C34 . C35 . H351 . 112.2    no
C34 . C35 . H352 . 111.7    no
H351 . C35 . H352 . 107.9    no
C34 . C35 . H353 . 111.2    no
H351 . C35 . H353 . 107.4    no
H352 . C35 . H353 . 106.1    no
C29 . C36 . C34 . 122.0(2)    yes
C29 . C36 . H361 . 118.8    no
C34 . C36 . H361 . 119.2    no
P3 . C37 . C38 . 110.64(14)    yes
P3 . C37 . C39 . 111.09(15)    yes
C38 . C37 . C39 . 111.00(19)    yes
P3 . C37 . H371 . 106.1    no
C38 . C37 . H371 . 109.5    no
C39 . C37 . H371 . 108.3    no
C37 . C38 . H381 . 108.9    no
C37 . C38 . H382 . 110.4    no
H381 . C38 . H382 . 109.9    no
C37 . C38 . H383 . 109.9    no
H381 . C38 . H383 . 108.8    no
H382 . C38 . H383 . 109.0    no
C37 . C39 . H391 . 110.5    no
C37 . C39 . H392 . 110.3    no
H391 . C39 . H392 . 108.0    no
C37 . C39 . H393 . 111.1    no
H391 . C39 . H393 . 110.2    no
H392 . C39 . H393 . 106.7    no
P3 . C40 . C41 . 111.61(16)    yes
P3 . C40 . C42 . 112.81(18)    yes
C41 . C40 . C42 . 110.0(2)    yes
P3 . C40 . H401 . 104.7    no
C41 . C40 . H401 . 108.0    no
C42 . C40 . H401 . 109.5    no
C40 . C41 . H411 . 109.6    no
C40 . C41 . H412 . 109.2    no
H411 . C41 . H412 . 107.9    no
C40 . C41 . H413 . 112.3    no
H411 . C41 . H413 . 107.8    no
H412 . C41 . H413 . 109.9    no
C40 . C42 . H421 . 108.5    no
C40 . C42 . H422 . 109.2    no
H421 . C42 . H422 . 108.5    no
C40 . C42 . H423 . 110.9    no
H421 . C42 . H423 . 110.4    no
H422 . C42 . H423 . 109.4    no
O1 . C43 . C44 . 105.75(18)    yes
O1 . C43 . H431 . 109.2    no
C44 . C43 . H431 . 112.4    no
O1 . C43 . H432 . 109.7    no
C44 . C43 . H432 . 108.9    no
H431 . C43 . H432 . 110.8    no
C43 . C44 . C45 . 105.07(18)    yes
C43 . C44 . H441 . 110.0    no
C45 . C44 . H441 . 108.3    no
C43 . C44 . H442 . 112.4    no
C45 . C44 . H442 . 112.2    no
H441 . C44 . H442 . 108.8    no
C44 . C45 . C46 . 104.89(18)    yes
C44 . C45 . H451 . 111.3    no
C46 . C45 . H451 . 109.7    no
C44 . C45 . H452 . 110.0    no
C46 . C45 . H452 . 110.7    no
H451 . C45 . H452 . 110.2    no
C45 . C46 . O1 . 105.07(17)    yes
C45 . C46 . H461 . 111.1    no
O1 . C46 . H461 . 109.4    no
C45 . C46 . H462 . 112.2    no
O1 . C46 . H462 . 110.0    no
H461 . C46 . H462 . 108.9    no
N101 . C101 . C102 . 120.2(2)    yes
N101 . C101 . C108 . 121.2(2)    yes
C102 . C101 . C108 . 118.2(2)    yes
C101 . C102 . C103 . 121.7(2)    yes
C101 . C102 . H1021 . 118.4    no
C103 . C102 . H1021 . 119.9    no
C102 . C103 . C104 . 120.4(2)    yes
C102 . C103 . C105 . 118.4(2)    yes
C104 . C103 . C105 . 121.1(2)    yes
C103 . C104 . H1041 . 110.0    no
C103 . C104 . H1042 . 110.9    no
H1041 . C104 . H1042 . 107.5    no
C103 . C104 . H1043 . 111.2    no
H1041 . C104 . H1043 . 109.1    no
H1042 . C104 . H1043 . 108.0    no
C103 . C105 . C106 . 121.5(2)    yes
C103 . C105 . H1051 . 118.7    no
C106 . C105 . H1051 . 119.8    no
C105 . C106 . C107 . 121.3(2)    yes
C105 . C106 . C108 . 118.8(2)    yes
C107 . C106 . C108 . 120.0(2)    yes
C106 . C107 . H1071 . 111.2    no
C106 . C107 . H1072 . 112.5    no
H1071 . C107 . H1072 . 108.4    no
C106 . C107 . H1073 . 109.8    no
H1071 . C107 . H1073 . 107.3    no
H1072 . C107 . H1073 . 107.5    no
C106 . C108 . C101 . 121.4(2)    yes
C106 . C108 . H1081 . 118.5    no
C101 . C108 . H1081 . 120.1    no
P101 . C109 . C110 . 115.1(2)    yes
P101 . C109 . C111 . 113.9(2)    yes
C110 . C109 . C111 . 110.2(3)    yes
P101 . C109 . H1091 . 104.9    no
C110 . C109 . H1091 . 107.3    no
C111 . C109 . H1091 . 104.4    no
C109 . C110 . H1101 . 108.9    no
C109 . C110 . H1102 . 111.7    no
H1101 . C110 . H1102 . 108.9    no
C109 . C110 . H1103 . 110.4    no
H1101 . C110 . H1103 . 109.5    no
H1102 . C110 . H1103 . 107.4    no
C109 . C111 . H1111 . 110.0    no
C109 . C111 . H1112 . 109.5    no
H1111 . C111 . H1112 . 111.2    no
C109 . C111 . H1113 . 110.7    no
H1111 . C111 . H1113 . 108.4    no
H1112 . C111 . H1113 . 107.0    no
P101 . C112 . C113 . 109.7(3)    yes
P101 . C112 . C114 . 116.8(3)    yes
C113 . C112 . C114 . 110.7(3)    yes
P101 . C112 . H1121 . 107.4    no
C113 . C112 . H1121 . 105.9    no
C114 . C112 . H1121 . 105.7    no
C112 . C113 . H1131 . 109.8    no
C112 . C113 . H1132 . 108.8    no
H1131 . C113 . H1132 . 109.4    no
C112 . C113 . H1133 . 109.8    no
H1131 . C113 . H1133 . 109.9    no
H1132 . C113 . H1133 . 109.1    no
C112 . C114 . H1141 . 111.0    no
C112 . C114 . H1142 . 106.0    no
H1141 . C114 . H1142 . 112.8    no
C112 . C114 . H1143 . 107.6    no
H1141 . C114 . H1143 . 111.1    no
H1142 . C114 . H1143 . 108.1    no
N102 . C115 . C116 . 117.98(19)    yes
N102 . C115 . C122 . 124.4(2)    yes
C116 . C115 . C122 . 117.6(2)    yes
C115 . C116 . C117 . 122.1(2)    yes
C115 . C116 . H1161 . 119.4    no
C117 . C116 . H1161 . 118.5    no
C116 . C117 . C118 . 119.8(2)    yes
C116 . C117 . C119 . 118.8(2)    yes
C118 . C117 . C119 . 121.3(2)    yes
C117 . C118 . H1181 . 111.4    no
C117 . C118 . H1182 . 111.3    no
H1181 . C118 . H1182 . 108.8    no
C117 . C118 . H1183 . 110.8    no
H1181 . C118 . H1183 . 106.5    no
H1182 . C118 . H1183 . 107.9    no
C117 . C119 . C120 . 121.0(2)    yes
C117 . C119 . H1191 . 120.5    no
C120 . C119 . H1191 . 118.6    no
C119 . C120 . C121 . 121.0(2)    yes
C119 . C120 . C122 . 119.0(2)    yes
C121 . C120 . C122 . 120.0(2)    yes
C120 . C121 . H1211 . 111.5    no
C120 . C121 . H1212 . 110.3    no
H1211 . C121 . H1212 . 108.5    no
C120 . C121 . H1213 . 110.3    no
H1211 . C121 . H1213 . 106.9    no
H1212 . C121 . H1213 . 109.2    no
C115 . C122 . C120 . 121.5(2)    yes
C115 . C122 . H1221 . 119.9    no
C120 . C122 . H1221 . 118.6    no
P102 . C123 . C124 . 118.18(16)    yes
P102 . C123 . C125 . 111.26(17)    yes
C124 . C123 . C125 . 109.8(2)    yes
P102 . C123 . H1231 . 104.4    no
C124 . C123 . H1231 . 106.4    no
C125 . C123 . H1231 . 105.9    no
C123 . C124 . H1241 . 110.3    no
C123 . C124 . H1242 . 109.8    no
H1241 . C124 . H1242 . 107.7    no
C123 . C124 . H1243 . 111.4    no
H1241 . C124 . H1243 . 107.5    no
H1242 . C124 . H1243 . 110.1    no
C123 . C125 . H1251 . 109.1    no
C123 . C125 . H1252 . 107.8    no
H1251 . C125 . H1252 . 111.0    no
C123 . C125 . H1253 . 107.7    no
H1251 . C125 . H1253 . 111.1    no
H1252 . C125 . H1253 . 109.9    no
P102 . C126 . C127 . 110.56(15)    yes
P102 . C126 . C128 . 109.88(16)    yes
C127 . C126 . C128 . 111.5(2)    yes
P102 . C126 . H1261 . 107.7    no
C127 . C126 . H1261 . 108.0    no
C128 . C126 . H1261 . 109.2    no
C126 . C127 . H1271 . 110.6    no
C126 . C127 . H1272 . 110.7    no
H1271 . C127 . H1272 . 107.9    no
C126 . C127 . H1273 . 110.3    no
H1271 . C127 . H1273 . 108.6    no
H1272 . C127 . H1273 . 108.7    no
C126 . C128 . H1281 . 109.7    no
C126 . C128 . H1282 . 110.6    no
H1281 . C128 . H1282 . 109.4    no
C126 . C128 . H1283 . 109.6    no
H1281 . C128 . H1283 . 108.1    no
H1282 . C128 . H1283 . 109.5    no
N103 . C129 . C130 . 121.42(19)    yes
N103 . C129 . C136 . 120.14(18)    yes
C130 . C129 . C136 . 118.40(19)    yes
C129 . C130 . C131 . 121.5(2)    yes
C129 . C130 . H1301 . 118.4    no
C131 . C130 . H1301 . 120.1    no
C130 . C131 . C132 . 120.6(2)    yes
C130 . C131 . C133 . 118.8(2)    yes
C132 . C131 . C133 . 120.7(2)    yes
C131 . C132 . H1321 . 110.4    no
C131 . C132 . H1322 . 112.3    no
H1321 . C132 . H1322 . 105.6    no
C131 . C132 . H1323 . 109.6    no
H1321 . C132 . H1323 . 108.9    no
H1322 . C132 . H1323 . 110.0    no
C131 . C133 . C134 . 121.1(2)    yes
C131 . C133 . H1331 . 120.5    no
C134 . C133 . H1331 . 118.4    no
C133 . C134 . C135 . 120.9(2)    yes
C133 . C134 . C136 . 118.7(2)    yes
C135 . C134 . C136 . 120.4(2)    yes
C134 . C135 . H1351 . 110.9    no
C134 . C135 . H1352 . 111.9    no
H1351 . C135 . H1352 . 108.0    no
C134 . C135 . H1353 . 110.6    no
H1351 . C135 . H1353 . 107.6    no
H1352 . C135 . H1353 . 107.7    no
C129 . C136 . C134 . 121.5(2)    yes
C129 . C136 . H1361 . 119.3    no
C134 . C136 . H1361 . 119.1    no
P103 . C137 . C138 . 120.28(16)    yes
P103 . C137 . C139 . 110.47(15)    yes
C138 . C137 . C139 . 109.62(19)    yes
P103 . C137 . H1371 . 102.1    no
C138 . C137 . H1371 . 106.8    no
C139 . C137 . H1371 . 106.4    no
C137 . C138 . H1381 . 111.4    no
C137 . C138 . H1382 . 109.9    no
H1381 . C138 . H1382 . 108.4    no
C137 . C138 . H1383 . 110.4    no
H1381 . C138 . H1383 . 108.4    no
H1382 . C138 . H1383 . 108.3    no
C137 . C139 . H1391 . 112.0    no
C137 . C139 . H1392 . 110.5    no
H1391 . C139 . H1392 . 107.6    no
C137 . C139 . H1393 . 110.2    no
H1391 . C139 . H1393 . 108.6    no
H1392 . C139 . H1393 . 107.8    no
P103 . C140 . C141 . 119.37(16)    yes
P103 . C140 . C142 . 111.50(16)    yes
C141 . C140 . C142 . 109.97(19)    yes
P103 . C140 . H1401 . 102.7    no
C141 . C140 . H1401 . 105.4    no
C142 . C140 . H1401 . 106.7    no
C140 . C141 . H1411 . 108.9    no
C140 . C141 . H1412 . 109.6    no
H1411 . C141 . H1412 . 109.9    no
C140 . C141 . H1413 . 111.9    no
H1411 . C141 . H1413 . 107.9    no
H1412 . C141 . H1413 . 108.5    no
C140 . C142 . H1421 . 110.5    no
C140 . C142 . H1422 . 110.0    no
H1421 . C142 . H1422 . 107.9    no
C140 . C142 . H1423 . 110.1    no
H1421 . C142 . H1423 . 108.5    no
H1422 . C142 . H1423 . 109.8    no
O101 . C143 . C144 . 105.02(18)    yes
O101 . C143 . H1431 . 108.7    no
C144 . C143 . H1431 . 111.0    no
O101 . C143 . H1432 . 108.8    no
C144 . C143 . H1432 . 112.1    no
H1431 . C143 . H1432 . 111.0    no
C143 . C144 . C145 . 104.24(18)    yes
C143 . C144 . H1441 . 111.2    no
C145 . C144 . H1441 . 109.8    no
C143 . C144 . H1442 . 109.3    no
C145 . C144 . H1442 . 112.4    no
H1441 . C144 . H1442 . 109.8    no
C144 . C145 . C146 . 104.75(18)    yes
C144 . C145 . H1451 . 111.3    no
C146 . C145 . H1451 . 109.8    no
C144 . C145 . H1452 . 111.8    no
C146 . C145 . H1452 . 109.5    no
H1451 . C145 . H1452 . 109.6    no
C145 . C146 . O101 . 105.48(17)    yes
C145 . C146 . H1461 . 112.0    no
O101 . C146 . H1461 . 109.0    no
C145 . C146 . H1462 . 110.4    no
O101 . C146 . H1462 . 110.2    no
H1461 . C146 . H1462 . 109.7    no
P101 . C209 . C210 . 111.2(6)    yes
P101 . C209 . C211 . 110.2(6)    yes
C210 . C209 . C211 . 108.5(8)    yes
P101 . C209 . H2091 . 110.0    no
C210 . C209 . H2091 . 108.5    no
C211 . C209 . H2091 . 108.4    no
C209 . C210 . H2101 . 110.4    no
C209 . C210 . H2102 . 109.6    no
H2101 . C210 . H2102 . 108.8    no
C209 . C210 . H2103 . 109.2    no
H2101 . C210 . H2103 . 109.7    no
H2102 . C210 . H2103 . 109.1    no
C209 . C211 . H2111 . 110.2    no
C209 . C211 . H2112 . 109.8    no
H2111 . C211 . H2112 . 109.6    no
C209 . C211 . H2113 . 109.8    no
H2111 . C211 . H2113 . 109.0    no
H2112 . C211 . H2113 . 108.4    no
P101 . C212 . C213 . 116.3(5)    yes
P101 . C212 . C214 . 109.6(5)    yes
C213 . C212 . C214 . 112.7(6)    yes
P101 . C212 . H2121 . 107.0    no
C213 . C212 . H2121 . 105.4    no
C214 . C212 . H2121 . 104.8    no
C212 . C213 . H2131 . 110.1    no
C212 . C213 . H2132 . 107.7    no
H2131 . C213 . H2132 . 110.7    no
C212 . C213 . H2133 . 108.7    no
H2131 . C213 . H2133 . 109.5    no
H2132 . C213 . H2133 . 110.1    no
C212 . C214 . H2141 . 111.3    no
C212 . C214 . H2142 . 109.8    no
H2141 . C214 . H2142 . 110.8    no
C212 . C214 . H2143 . 108.7    no
H2141 . C214 . H2143 . 107.3    no
H2142 . C214 . H2143 . 108.7    no


_iucr_refine_instructions_details_constraints
;
#
# Punched on 25/02/14 at 15:56:13
#
#LIST     12                                                                    
BLOCK 
CONT SCALE 
CONT CO   (    1 ,X'S,U'S)  UNTIL C    (  108 ) 
CONT C    (  109 ,X'S,U[ISO])  UNTIL C    (  114 ) 
CONT C    (  115 ,X'S,U'S)  UNTIL C    (  146 ) 
CONT C    (  209 ,X'S,U[ISO])  UNTIL C    (  214 ) 
EQUIVALENCE PART(1001, OCC) 
CONTINUE    PART(1002, OCC) 
WEIGHT -1   PART(1002, OCC) 
EQUIVALENCE PART(1003, OCC) 
CONTINUE    PART(1004, OCC) 
WEIGHT -1   PART(1004, OCC) 
RIDE C   (   2,X'S) H   (  21,X'S) 
RIDE C   (   4,X'S) H   (  41,X'S) H   (  42,X'S) H   (  43,X'S) 
RIDE C   (   5,X'S) H   (  51,X'S) 
RIDE C   (   7,X'S) H   (  71,X'S) H   (  72,X'S) H   (  73,X'S) 
RIDE C   (   8,X'S) H   (  81,X'S) 
RIDE C   (   9,X'S) H   (  91,X'S) 
RIDE C   (  10,X'S) H   ( 101,X'S) H   ( 102,X'S) H   ( 103,X'S) 
RIDE C   (  11,X'S) H   ( 111,X'S) H   ( 112,X'S) H   ( 113,X'S) 
RIDE C   (  12,X'S) H   ( 121,X'S) 
RIDE C   (  13,X'S) H   ( 131,X'S) H   ( 132,X'S) H   ( 133,X'S) 
RIDE C   (  14,X'S) H   ( 141,X'S) H   ( 142,X'S) H   ( 143,X'S) 
RIDE C   (  16,X'S) H   ( 161,X'S) 
RIDE C   (  18,X'S) H   ( 181,X'S) H   ( 182,X'S) H   ( 183,X'S) 
RIDE C   (  19,X'S) H   ( 191,X'S) 
RIDE C   (  21,X'S) H   ( 211,X'S) H   ( 212,X'S) H   ( 213,X'S) 
RIDE C   (  22,X'S) H   ( 221,X'S) 
RIDE C   (  23,X'S) H   ( 231,X'S) 
RIDE C   (  24,X'S) H   ( 241,X'S) H   ( 242,X'S) H   ( 243,X'S) 
RIDE C   (  25,X'S) H   ( 251,X'S) H   ( 252,X'S) H   ( 253,X'S) 
RIDE C   (  26,X'S) H   ( 261,X'S) 
RIDE C   (  27,X'S) H   ( 271,X'S) H   ( 272,X'S) H   ( 273,X'S) 
RIDE C   (  28,X'S) H   ( 281,X'S) H   ( 282,X'S) H   ( 283,X'S) 
RIDE C   (  30,X'S) H   ( 301,X'S) 
RIDE C   (  32,X'S) H   ( 321,X'S) H   ( 322,X'S) H   ( 323,X'S) 
RIDE C   (  33,X'S) H   ( 331,X'S) 
RIDE C   (  35,X'S) H   ( 351,X'S) H   ( 352,X'S) H   ( 353,X'S) 
RIDE C   (  36,X'S) H   ( 361,X'S) 
RIDE C   (  37,X'S) H   ( 371,X'S) 
RIDE C   (  38,X'S) H   ( 381,X'S) H   ( 382,X'S) H   ( 383,X'S) 
RIDE C   (  39,X'S) H   ( 391,X'S) H   ( 392,X'S) H   ( 393,X'S) 
RIDE C   (  40,X'S) H   ( 401,X'S) 
RIDE C   (  41,X'S) H   ( 411,X'S) H   ( 412,X'S) H   ( 413,X'S) 
RIDE C   (  42,X'S) H   ( 421,X'S) H   ( 422,X'S) H   ( 423,X'S) 
RIDE C   (  43,X'S) H   ( 431,X'S) H   ( 432,X'S) 
RIDE C   (  44,X'S) H   ( 441,X'S) H   ( 442,X'S) 
RIDE C   (  45,X'S) H   ( 451,X'S) H   ( 452,X'S) 
RIDE C   (  46,X'S) H   ( 461,X'S) H   ( 462,X'S) 
RIDE C   ( 102,X'S) H   (1021,X'S) 
RIDE C   ( 104,X'S) H   (1041,X'S) H   (1042,X'S) H   (1043,X'S) 
RIDE C   ( 105,X'S) H   (1051,X'S) 
RIDE C   ( 107,X'S) H   (1071,X'S) H   (1072,X'S) H   (1073,X'S) 
RIDE C   ( 108,X'S) H   (1081,X'S) 
RIDE C   ( 109,X'S) H   (1091,X'S) 
RIDE C   ( 110,X'S) H   (1101,X'S) H   (1102,X'S) H   (1103,X'S) 
RIDE C   ( 111,X'S) H   (1111,X'S) H   (1112,X'S) H   (1113,X'S) 
RIDE C   ( 112,X'S) H   (1121,X'S) 
RIDE C   ( 113,X'S) H   (1131,X'S) H   (1132,X'S) H   (1133,X'S) 
RIDE C   ( 114,X'S) H   (1141,X'S) H   (1142,X'S) H   (1143,X'S) 
RIDE C   ( 116,X'S) H   (1161,X'S) 
RIDE C   ( 118,X'S) H   (1181,X'S) H   (1182,X'S) H   (1183,X'S) 
RIDE C   ( 119,X'S) H   (1191,X'S) 
RIDE C   ( 121,X'S) H   (1211,X'S) H   (1212,X'S) H   (1213,X'S) 
RIDE C   ( 122,X'S) H   (1221,X'S) 
RIDE C   ( 123,X'S) H   (1231,X'S) 
RIDE C   ( 124,X'S) H   (1241,X'S) H   (1242,X'S) H   (1243,X'S) 
RIDE C   ( 125,X'S) H   (1251,X'S) H   (1252,X'S) H   (1253,X'S) 
RIDE C   ( 126,X'S) H   (1261,X'S) 
RIDE C   ( 127,X'S) H   (1271,X'S) H   (1272,X'S) H   (1273,X'S) 
RIDE C   ( 128,X'S) H   (1281,X'S) H   (1282,X'S) H   (1283,X'S) 
RIDE C   ( 130,X'S) H   (1301,X'S) 
RIDE C   ( 132,X'S) H   (1321,X'S) H   (1322,X'S) H   (1323,X'S) 
RIDE C   ( 133,X'S) H   (1331,X'S) 
RIDE C   ( 135,X'S) H   (1351,X'S) H   (1352,X'S) H   (1353,X'S) 
RIDE C   ( 136,X'S) H   (1361,X'S) 
RIDE C   ( 137,X'S) H   (1371,X'S) 
RIDE C   ( 138,X'S) H   (1381,X'S) H   (1382,X'S) H   (1383,X'S) 
RIDE C   ( 139,X'S) H   (1391,X'S) H   (1392,X'S) H   (1393,X'S) 
RIDE C   ( 140,X'S) H   (1401,X'S) 
RIDE C   ( 141,X'S) H   (1411,X'S) H   (1412,X'S) H   (1413,X'S) 
RIDE C   ( 142,X'S) H   (1421,X'S) H   (1422,X'S) H   (1423,X'S) 
RIDE C   ( 143,X'S) H   (1431,X'S) H   (1432,X'S) 
RIDE C   ( 144,X'S) H   (1441,X'S) H   (1442,X'S) 
RIDE C   ( 145,X'S) H   (1451,X'S) H   (1452,X'S) 
RIDE C   ( 146,X'S) H   (1461,X'S) H   (1462,X'S) 
RIDE C   ( 209,X'S) H   (2091,X'S) 
RIDE C   ( 210,X'S) H   (2101,X'S) H   (2102,X'S) H   (2103,X'S) 
RIDE C   ( 211,X'S) H   (2111,X'S) H   (2112,X'S) H   (2113,X'S) 
RIDE C   ( 212,X'S) H   (2121,X'S) 
RIDE C   ( 213,X'S) H   (2131,X'S) H   (2132,X'S) H   (2133,X'S) 
RIDE C   ( 214,X'S) H   (2141,X'S) H   (2142,X'S) H   (2143,X'S) 
END                                                                             
;


_iucr_refine_instructions_details_restraints
;
#
# Punched on 25/02/14 at 15:56:13
#
#LIST     16                                                                    
NO 
REM   HREST   START (DO NOT REMOVE THIS LINE) 
REM   HREST   END (DO NOT REMOVE THIS LINE) 
END                                                                             
;

####

data_6 
_audit_creation_date        "2015-07-15"
_audit_creation_method CRYSTALS_ver_14.61

_vrf_PLAT201_6
;
PROBLEM: Isotropic non-H Atoms in Main Residue(s) .......          2      
         
RESPONSE: Disordored N2 molecules were refined by using 
isotropic displacement parameters.
;

_oxford_structure_analysis_title  'bw_413_0m in P-1'
_chemical_name_systematic         ?
_chemical_melting_point           ?

_cell_length_a                    10.8726(4)
_cell_length_b                    11.7445(4)
_cell_length_c                    18.6225(6)
_cell_angle_alpha                 91.1046(18)
_cell_angle_beta                  105.3493(17)
_cell_angle_gamma                 96.8835(18)
_cell_volume                      2273.38(14)
 
_symmetry_cell_setting            'triclinic' 
_symmetry_space_group_name_H-M    'P -1 ' 
_symmetry_space_group_name_Hall   '-P 1'
loop_
 _symmetry_equiv_pos_as_xyz
 'x,y,z'
 '-x,-y,-z'

loop_
_atom_type_symbol
_atom_type_scat_dispersion_real
_atom_type_scat_dispersion_imag
_atom_type_scat_Cromer_Mann_a1
_atom_type_scat_Cromer_Mann_b1
_atom_type_scat_Cromer_Mann_a2
_atom_type_scat_Cromer_Mann_b2
_atom_type_scat_Cromer_Mann_a3
_atom_type_scat_Cromer_Mann_b3
_atom_type_scat_Cromer_Mann_a4
_atom_type_scat_Cromer_Mann_b4
_atom_type_scat_Cromer_Mann_c
_atom_type_scat_source  
 C       0.0033   0.0016   2.3100  20.8439   1.0200  10.2075   1.5886   0.5687
   0.8650  51.6512   0.2156 'International Tables Vol C 4.2.6.8 and 6.1.1.4'
 H       0.0000   0.0000   0.4930  10.5109   0.3229  26.1257   0.1402   3.1424
   0.0408  57.7998   0.0030 'International Tables Vol C 4.2.6.8 and 6.1.1.4'
 N       0.0061   0.0033  12.2126   0.0057   3.1322   9.8933   2.0125  28.9975
   1.1663   0.5826 -11.5290 'International Tables Vol C 4.2.6.8 and 6.1.1.4'
 P       0.1023   0.0942   6.4345   1.9067   4.1791  27.1570   1.7800   0.5260
   1.4908  68.1645   1.1149 'International Tables Vol C 4.2.6.8 and 6.1.1.4'
 Ti      0.2776   0.4457   9.7595   7.8508   7.3558   0.5000   1.6991  35.6338
   1.9021 116.1050   1.2807 'International Tables Vol C 4.2.6.8 and 6.1.1.4'
 Co      0.3494   0.9721  12.2841   4.2791   7.3409   0.2784   4.0034  13.5359
   2.3488  71.1692   1.0118 'International Tables Vol C 4.2.6.8 and 6.1.1.4'
 
 
_cell_formula_units_Z                    2

# Given Formula = C42 H72 Co1 N6 P3 Ti1 
# Dc =      1.26 Fooo =    920.00 Mu =      6.81 M =    860.83
# Found Formula = C42 H72 Co1 N6 P3 Ti1 
# Dc =      1.26 FOOO =    920.00 Mu =      6.81 M =    860.83

_chemical_formula_sum             'C42 H72 Co1 N6 P3 Ti1'
_chemical_formula_moiety          'C42 H72 Co1 N6 P3 Ti1'
_chemical_compound_source                ?
_chemical_formula_weight            860.83
 
 
_cell_measurement_reflns_used         9907
_cell_measurement_theta_min              3
_cell_measurement_theta_max             30
_cell_measurement_temperature          120
 
_exptl_crystal_description        'prism' 
_exptl_crystal_colour             'red' 
_exptl_crystal_size_min           0.160 
_exptl_crystal_size_mid           0.330 
_exptl_crystal_size_max           0.350 
 
_exptl_crystal_density_diffrn     1.257 
_exptl_crystal_density_meas       ? 
_exptl_crystal_density_method     'not measured' 
# Non-dispersive F(000): 
_exptl_crystal_F_000              920 
_exptl_absorpt_coefficient_mu     0.681 
 
# Sheldrick geometric approximatio 0.80 0.90 
_exptl_absorpt_correction_type    numerical 
_exptl_absorpt_process_details 
; 
 Analytical Absorption (De Meulenaer & Tompa, 1965) 
; 
_exptl_absorpt_correction_T_min   0.80 
_exptl_absorpt_correction_T_max   0.90 
_diffrn_measurement_device_type   'Bruker Kappa Apex2' 
_diffrn_measurement_device        'Area' 
_diffrn_radiation_monochromator   'graphite' 
_diffrn_radiation_type            'Mo K\a'
_diffrn_radiation_wavelength           0.71073
_diffrn_measurement_method        '\f & \w scans' 
 
# If a reference occurs more than once, delete the author 
# and date from subsequent references. 
_computing_data_collection        'Apex2 (Bruker AXS, 2006)' 
_computing_cell_refinement        'Apex2 (Bruker AXS, 2006)' 
_computing_data_reduction         'Apex2 (Bruker AXS, 2006)' 
_computing_structure_solution     'Superflip (Palatinus & Chapuis, 2007)' 
_computing_structure_refinement   'CRYSTALS (Betteridge et al., 2003)' 
_computing_publication_material   'CRYSTALS (Betteridge et al., 2003)' 
_computing_molecular_graphics     'CAMERON (Watkin et al., 1996)' 
 
_diffrn_standards_interval_time   . 
_diffrn_standards_interval_count  . 
_diffrn_standards_number          0 
_diffrn_standards_decay_%         ? 
 
_diffrn_ambient_temperature        120
_diffrn_reflns_number             48567 
_reflns_number_total              13213 
_diffrn_reflns_av_R_equivalents   0.036 
# Number of reflections without Friedels Law is 0 
# Number of reflections with Friedels Law is 13213 
# Theoretical number of reflections is about 26551 
 
 
_diffrn_reflns_theta_min          1.135 
_diffrn_reflns_theta_max          30.011 
_diffrn_measured_fraction_theta_max 0.995 
 
_diffrn_reflns_theta_full         29.411 
_diffrn_measured_fraction_theta_full 0.996 
 
 
_diffrn_reflns_limit_h_min        -15 
_diffrn_reflns_limit_h_max        15 
_diffrn_reflns_limit_k_min        -16 
_diffrn_reflns_limit_k_max        16 
_diffrn_reflns_limit_l_min        -26 
_diffrn_reflns_limit_l_max        26 
_reflns_limit_h_min               -15 
_reflns_limit_h_max               14 
_reflns_limit_k_min               -16 
_reflns_limit_k_max               16 
_reflns_limit_l_min               0 
_reflns_limit_l_max               26 
 
_oxford_diffrn_Wilson_B_factor    0.00 
_oxford_diffrn_Wilson_scale       0.00 
 
_atom_sites_solution_primary      Other  #heavy,direct,difmap,geom,iterative
# _atom_sites_solution_secondary  difmap
_atom_sites_solution_hydrogens    difmap
 
_refine_diff_density_min          -0.50 
_refine_diff_density_max          0.92 
 
 
# The current dictionary definitions do not cover the 
# situation where the reflections used for refinement were 
# selected by a user-defined sigma threshold 
 
 
# The values actually used during refinement 
_oxford_reflns_threshold_expression_ref     I>-10.0\s(I)
_refine_ls_number_reflns          13213 
_refine_ls_number_restraints      12 
_refine_ls_number_parameters      489 
_oxford_refine_ls_R_factor_ref    0.0470 
_refine_ls_wR_factor_ref          0.0912 
_refine_ls_goodness_of_fit_ref    1.0057 
_refine_ls_shift/su_max           0.0155869 
_refine_ls_shift/su_mean          0.0002855 
 
 
# The values computed with all filters except I/sigma 
_oxford_reflns_number_all         13213 
_refine_ls_R_factor_all           0.0470 
_refine_ls_wR_factor_all          0.0912 
 
# The values computed with a 2 sigma cutoff - a la SHELX 
_reflns_threshold_expression      I>2.0\s(I)
_reflns_number_gt                 10289 
_refine_ls_R_factor_gt            0.0333 
_refine_ls_wR_factor_gt           0.0812 
 
# choose from: rm (reference molecule of known chirality), 
# ad (anomolous dispersion - Flack), rmad (rm and ad), 
# syn (from synthesis), unk (unknown) or . (not applicable). 
_chemical_absolute_configuration  '.' 
 
 
_refine_ls_structure_factor_coef  Fsqd 
_refine_ls_matrix_type            full
_refine_ls_hydrogen_treatment     mixed          #undef, noref, refall,
                                                 # refxyz, refU, constr or mixed
_refine_ls_weighting_scheme       calc 
_refine_ls_weighting_details 
;
 Method= Modified Sheldrick 
 w=1/[\s^2^(F^2^) + ( 0.04P)^2^ + 1.42P] 
 ,where P=(max(Fo^2^,0) + 2Fc^2^)/3 
;
# Insert your own references if required - in alphabetical order 
_publ_section_references 
; 
Betteridge, P.W., Carruthers, J.R., Cooper, R.I., 
Prout, K. & Watkin, D.J. (2003). J. Appl. Cryst. 36, 1487. 
 
Bruker Analytical X-ray Systems, Inc., 2006. <i>Apex2</i>, 
Version 2 User Manual, M86-E01078, Madison, WI. 
 
De Meulenaer, J. & Tompa, H. (1965). Acta Cryst. 19, 1014. 
 
Palatinus, L. & Chapuis, G. (2007). J. Appl. Cryst. 40, 786-790. 
 
Watkin, D.J., Prout, C.K. & Pearce, L.J. (1996). CAMERON, Chemical 
Crystallography Laboratory, Oxford, UK. 
; 

# Uequiv = arithmetic mean of Ui i.e. Ueqiv = (U1+U2+U3)/3

# Replace last . with number of unfound hydrogen atoms attached to an atom.

# ..._refinement_flags_... 
# . no refinement constraints           S special position constraint on site
# G rigid group refinement of site      R riding atom
# D distance or angle restraint on site T thermal displacement constraints
# U Uiso or Uij restraint (rigid bond)  P partial occupancy constraint


loop_
_atom_site_label
_atom_site_type_symbol
_atom_site_fract_x
_atom_site_fract_y
_atom_site_fract_z
_atom_site_U_iso_or_equiv
_atom_site_occupancy
_atom_site_adp_type
_atom_site_refinement_flags_posn
_atom_site_refinement_flags_adp
_atom_site_refinement_flags_occupancy
_atom_site_disorder_assembly
_atom_site_disorder_group
_atom_site_attached_hydrogens
Co1 Co 0.291253(19) 0.235458(17) 0.257329(11) 0.0132 1.0000 Uani . . . . . . 
Ti1 Ti 0.09351(2) 0.24703(2) 0.270354(14) 0.0121 1.0000 Uani D . . . . . 
P1 P 0.31598(4) 0.31139(3) 0.37132(2) 0.0148 1.0000 Uani . . . . . . 
P2 P 0.18469(4) 0.05930(3) 0.23327(2) 0.0138 1.0000 Uani . . . . . . 
P3 P 0.20149(4) 0.34751(3) 0.16900(2) 0.0139 1.0000 Uani . . . . . . 
N1 N 0.16333(12) 0.29784(12) 0.37787(7) 0.0161 1.0000 Uani . . . . . . 
N2 N 0.03943(12) 0.08196(11) 0.24156(7) 0.0159 1.0000 Uani . . . . . . 
N3 N 0.06349(12) 0.36074(11) 0.19058(7) 0.0155 1.0000 Uani . . . . . . 
N4 N -0.11579(13) 0.26191(13) 0.27795(8) 0.0186 1.0000 Uani D . . . . . 
N5 N 0.4562(8) 0.2329(14) 0.2471(6) 0.015(2) 0.40(9) Uiso . . P 1 1 . 
N6 N 0.5514(7) 0.2249(10) 0.2351(16) 0.028(3) 0.40(9) Uiso . . P 1 1 . 
N7 N 0.4571(6) 0.2211(11) 0.2502(4) 0.0238(18) 0.60(9) Uiso . . P 1 2 . 
N8 N 0.5534(5) 0.2172(7) 0.2492(11) 0.0309(16) 0.60(9) Uiso . . P 1 2 . 
C1 C 0.11482(15) 0.30165(13) 0.44045(8) 0.0163 1.0000 Uani . . . . . . 
C2 C 0.15270(16) 0.39025(14) 0.49645(8) 0.0190 1.0000 Uani . . . . . . 
C3 C 0.09321(16) 0.39335(15) 0.55403(8) 0.0205 1.0000 Uani . . . . . . 
C4 C 0.13250(19) 0.49158(16) 0.61213(10) 0.0276 1.0000 Uani . . . . . . 
C5 C -0.00364(16) 0.30601(15) 0.55675(9) 0.0217 1.0000 Uani . . . . . . 
C6 C -0.04056(16) 0.21451(14) 0.50370(9) 0.0200 1.0000 Uani . . . . . . 
C7 C -0.14032(18) 0.11710(16) 0.50806(10) 0.0273 1.0000 Uani . . . . . . 
C8 C 0.01964(15) 0.21356(14) 0.44643(8) 0.0179 1.0000 Uani . . . . . . 
C9 C 0.38259(16) 0.46692(14) 0.39292(9) 0.0212 1.0000 Uani . . . . . . 
C10 C 0.27931(18) 0.54516(15) 0.36373(10) 0.0261 1.0000 Uani . . . . . . 
C11 C 0.50024(17) 0.49824(17) 0.36337(10) 0.0295 1.0000 Uani . . . . . . 
C12 C 0.40707(16) 0.24981(15) 0.45827(9) 0.0214 1.0000 Uani . . . . . . 
C13 C 0.35046(18) 0.12783(16) 0.46644(10) 0.0257 1.0000 Uani . . . . . . 
C14 C 0.54992(17) 0.25478(18) 0.46351(11) 0.0330 1.0000 Uani . . . . . . 
C15 C -0.08159(14) 0.01603(13) 0.23226(8) 0.0151 1.0000 Uani . . . . . . 
C16 C -0.11260(15) -0.04212(13) 0.29100(8) 0.0167 1.0000 Uani . . . . . . 
C17 C -0.23691(15) -0.09606(14) 0.28433(9) 0.0187 1.0000 Uani . . . . . . 
C18 C -0.27018(18) -0.15805(18) 0.34803(11) 0.0298 1.0000 Uani . . . . . . 
C19 C -0.33032(15) -0.09196(14) 0.21713(9) 0.0195 1.0000 Uani . . . . . . 
C20 C -0.30175(15) -0.03570(14) 0.15742(9) 0.0186 1.0000 Uani . . . . . . 
C21 C -0.40274(17) -0.03247(18) 0.08480(10) 0.0306 1.0000 Uani . . . . . . 
C22 C -0.17780(15) 0.01837(13) 0.16578(8) 0.0172 1.0000 Uani . . . . . . 
C23 C 0.23560(16) -0.05547(14) 0.29794(9) 0.0190 1.0000 Uani . . . . . . 
C24 C 0.15898(18) -0.17507(14) 0.27816(10) 0.0249 1.0000 Uani . . . . . . 
C25 C 0.38028(17) -0.06313(17) 0.31610(10) 0.0280 1.0000 Uani . . . . . . 
C26 C 0.16389(15) -0.00272(14) 0.13708(9) 0.0184 1.0000 Uani . . . . . . 
C27 C 0.05668(18) -0.10151(16) 0.10491(10) 0.0267 1.0000 Uani . . . . . . 
C28 C 0.29166(18) -0.03303(16) 0.12740(10) 0.0262 1.0000 Uani . . . . . . 
C29 C -0.05226(14) 0.40316(13) 0.15502(8) 0.0149 1.0000 Uani . . . . . . 
C30 C -0.14857(15) 0.33584(13) 0.10061(9) 0.0172 1.0000 Uani . . . . . . 
C31 C -0.26923(15) 0.37121(14) 0.07229(9) 0.0193 1.0000 Uani . . . . . . 
C32 C -0.37375(17) 0.29359(17) 0.01705(11) 0.0285 1.0000 Uani . . . . . . 
C33 C -0.29195(16) 0.47655(15) 0.09750(10) 0.0218 1.0000 Uani . . . . . . 
C34 C -0.19833(16) 0.54590(14) 0.15103(10) 0.0212 1.0000 Uani . . . . . . 
C35 C -0.2239(2) 0.66038(16) 0.17727(13) 0.0345 1.0000 Uani . . . . . . 
C36 C -0.07910(15) 0.50780(14) 0.18019(9) 0.0179 1.0000 Uani . . . . . . 
C37 C 0.15563(15) 0.29079(13) 0.07002(8) 0.0166 1.0000 Uani . . . . . . 
C38 C 0.09255(17) 0.37040(14) 0.01127(9) 0.0210 1.0000 Uani . . . . . . 
C39 C 0.26500(17) 0.24162(15) 0.04718(9) 0.0234 1.0000 Uani . . . . . . 
C40 C 0.28971(15) 0.49395(14) 0.17030(9) 0.0189 1.0000 Uani . . . . . . 
C41 C 0.21541(17) 0.58917(15) 0.13247(10) 0.0244 1.0000 Uani . . . . . . 
C42 C 0.41227(17) 0.48978(16) 0.14553(11) 0.0269 1.0000 Uani . . . . . . 
H1 H -0.1150(16) 0.2824(16) 0.3216(9) 0.0317(19) 1.0000 Uiso D . . . . . 
H2 H -0.1657(16) 0.1989(14) 0.2692(10) 0.0321(19) 1.0000 Uiso D . . . . . 
H3 H -0.1497(16) 0.3109(15) 0.2521(10) 0.0329(19) 1.0000 Uiso D . . . . . 
H21 H 0.2189 0.4501 0.4946 0.0230 1.0000 Uiso R . . . . . 
H41 H 0.2113 0.4821 0.6471 0.0431 1.0000 Uiso R . . . . . 
H42 H 0.0697 0.4965 0.6385 0.0416 1.0000 Uiso R . . . . . 
H43 H 0.1450 0.5638 0.5902 0.0426 1.0000 Uiso R . . . . . 
H51 H -0.0433 0.3085 0.5955 0.0261 1.0000 Uiso R . . . . . 
H71 H -0.2041 0.1048 0.4631 0.0414 1.0000 Uiso R . . . . . 
H72 H -0.1013 0.0471 0.5175 0.0425 1.0000 Uiso R . . . . . 
H73 H -0.1814 0.1307 0.5473 0.0419 1.0000 Uiso R . . . . . 
H81 H -0.0022 0.1506 0.4119 0.0213 1.0000 Uiso R . . . . . 
H91 H 0.4091 0.4774 0.4472 0.0252 1.0000 Uiso R . . . . . 
H101 H 0.2186 0.5421 0.3942 0.0388 1.0000 Uiso R . . . . . 
H102 H 0.2329 0.5223 0.3140 0.0377 1.0000 Uiso R . . . . . 
H103 H 0.3201 0.6223 0.3656 0.0402 1.0000 Uiso R . . . . . 
H111 H 0.4803 0.4794 0.3102 0.0432 1.0000 Uiso R . . . . . 
H112 H 0.5266 0.5796 0.3705 0.0447 1.0000 Uiso R . . . . . 
H113 H 0.5693 0.4577 0.3881 0.0440 1.0000 Uiso R . . . . . 
H121 H 0.3977 0.2980 0.4992 0.0259 1.0000 Uiso R . . . . . 
H131 H 0.3922 0.1038 0.5143 0.0385 1.0000 Uiso R . . . . . 
H132 H 0.2590 0.1194 0.4628 0.0394 1.0000 Uiso R . . . . . 
H133 H 0.3679 0.0772 0.4294 0.0385 1.0000 Uiso R . . . . . 
H141 H 0.5925 0.2148 0.5071 0.0502 1.0000 Uiso R . . . . . 
H142 H 0.5939 0.3326 0.4676 0.0502 1.0000 Uiso R . . . . . 
H143 H 0.5603 0.2159 0.4192 0.0488 1.0000 Uiso R . . . . . 
H161 H -0.0499 -0.0434 0.3360 0.0209 1.0000 Uiso R . . . . . 
H181 H -0.2008 -0.1470 0.3923 0.0470 1.0000 Uiso R . . . . . 
H182 H -0.3444 -0.1385 0.3580 0.0468 1.0000 Uiso R . . . . . 
H183 H -0.2868 -0.2372 0.3355 0.0474 1.0000 Uiso R . . . . . 
H191 H -0.4144 -0.1293 0.2121 0.0231 1.0000 Uiso R . . . . . 
H211 H -0.4688 -0.0940 0.0792 0.0470 1.0000 Uiso R . . . . . 
H212 H -0.3669 -0.0324 0.0436 0.0467 1.0000 Uiso R . . . . . 
H213 H -0.4420 0.0349 0.0854 0.0474 1.0000 Uiso R . . . . . 
H221 H -0.1576 0.0589 0.1258 0.0218 1.0000 Uiso R . . . . . 
H231 H 0.2204 -0.0260 0.3435 0.0228 1.0000 Uiso R . . . . . 
H241 H 0.1792 -0.2211 0.3213 0.0358 1.0000 Uiso R . . . . . 
H242 H 0.0663 -0.1722 0.2634 0.0365 1.0000 Uiso R . . . . . 
H243 H 0.1842 -0.2113 0.2389 0.0366 1.0000 Uiso R . . . . . 
H251 H 0.4095 -0.1072 0.3595 0.0414 1.0000 Uiso R . . . . . 
H252 H 0.4282 0.0125 0.3245 0.0410 1.0000 Uiso R . . . . . 
H253 H 0.3999 -0.1015 0.2747 0.0416 1.0000 Uiso R . . . . . 
H261 H 0.1432 0.0638 0.1061 0.0223 1.0000 Uiso R . . . . . 
H271 H 0.0427 -0.1089 0.0509 0.0389 1.0000 Uiso R . . . . . 
H272 H 0.0785 -0.1739 0.1254 0.0398 1.0000 Uiso R . . . . . 
H273 H -0.0237 -0.0885 0.1137 0.0405 1.0000 Uiso R . . . . . 
H281 H 0.3076 -0.1079 0.1492 0.0382 1.0000 Uiso R . . . . . 
H282 H 0.3646 0.0245 0.1518 0.0391 1.0000 Uiso R . . . . . 
H283 H 0.2875 -0.0395 0.0737 0.0387 1.0000 Uiso R . . . . . 
H301 H -0.1309 0.2645 0.0842 0.0203 1.0000 Uiso R . . . . . 
H321 H -0.4260 0.3366 -0.0174 0.0452 1.0000 Uiso R . . . . . 
H322 H -0.4281 0.2518 0.0412 0.0452 1.0000 Uiso R . . . . . 
H323 H -0.3403 0.2398 -0.0103 0.0445 1.0000 Uiso R . . . . . 
H331 H -0.3726 0.5009 0.0792 0.0262 1.0000 Uiso R . . . . . 
H351 H -0.3103 0.6632 0.1713 0.0545 1.0000 Uiso R . . . . . 
H352 H -0.1877 0.7221 0.1547 0.0544 1.0000 Uiso R . . . . . 
H353 H -0.1860 0.6760 0.2289 0.0539 1.0000 Uiso R . . . . . 
H361 H -0.0154 0.5517 0.2181 0.0215 1.0000 Uiso R . . . . . 
H371 H 0.0898 0.2264 0.0704 0.0180 1.0000 Uiso R . . . . . 
H381 H 0.0551 0.3256 -0.0348 0.0302 1.0000 Uiso R . . . . . 
H382 H 0.1562 0.4311 0.0036 0.0304 1.0000 Uiso R . . . . . 
H383 H 0.0263 0.4045 0.0250 0.0303 1.0000 Uiso R . . . . . 
H391 H 0.2332 0.1882 0.0045 0.0344 1.0000 Uiso R . . . . . 
H392 H 0.3224 0.3018 0.0339 0.0346 1.0000 Uiso R . . . . . 
H393 H 0.3140 0.2018 0.0880 0.0352 1.0000 Uiso R . . . . . 
H401 H 0.3161 0.5163 0.2225 0.0229 1.0000 Uiso R . . . . . 
H411 H 0.1986 0.5808 0.0788 0.0372 1.0000 Uiso R . . . . . 
H412 H 0.1361 0.5901 0.1450 0.0361 1.0000 Uiso R . . . . . 
H413 H 0.2664 0.6637 0.1481 0.0363 1.0000 Uiso R . . . . . 
H421 H 0.4585 0.4284 0.1691 0.0399 1.0000 Uiso R . . . . . 
H422 H 0.3929 0.4800 0.0916 0.0386 1.0000 Uiso R . . . . . 
H423 H 0.4664 0.5612 0.1607 0.0397 1.0000 Uiso R . . . . . 
loop_
_atom_site_aniso_label
_atom_site_aniso_U_11
_atom_site_aniso_U_22
_atom_site_aniso_U_33
_atom_site_aniso_U_23
_atom_site_aniso_U_13
_atom_site_aniso_U_12
Co1 0.01029(9) 0.01697(10) 0.01188(9) -0.00076(7) 0.00210(7) 0.00208(7) 
Ti1 0.01045(11) 0.01503(12) 0.01027(11) -0.00098(9) 0.00196(9) 0.00183(9) 
P1 0.01183(17) 0.01919(19) 0.01157(16) -0.00142(13) 0.00024(13) 0.00196(14) 
P2 0.01218(16) 0.01625(18) 0.01306(16) -0.00098(13) 0.00291(14) 0.00350(13) 
P3 0.01274(17) 0.01669(18) 0.01229(16) 0.00076(13) 0.00358(14) 0.00198(13) 
N1 0.0135(6) 0.0229(7) 0.0108(5) -0.0024(5) 0.0018(5) 0.0017(5) 
N2 0.0121(6) 0.0156(6) 0.0193(6) -0.0023(5) 0.0038(5) 0.0006(5) 
N3 0.0147(6) 0.0180(6) 0.0144(6) 0.0018(5) 0.0041(5) 0.0042(5) 
N4 0.0166(6) 0.0224(7) 0.0174(6) 0.0004(5) 0.0048(5) 0.0046(5) 
C1 0.0160(7) 0.0208(7) 0.0117(6) 0.0002(5) 0.0015(5) 0.0059(6) 
C2 0.0194(7) 0.0224(8) 0.0149(7) -0.0010(6) 0.0035(6) 0.0040(6) 
C3 0.0245(8) 0.0249(8) 0.0129(7) -0.0013(6) 0.0039(6) 0.0090(6) 
C4 0.0329(9) 0.0320(10) 0.0186(8) -0.0077(7) 0.0081(7) 0.0059(7) 
C5 0.0234(8) 0.0294(9) 0.0160(7) 0.0031(6) 0.0090(6) 0.0096(7) 
C6 0.0194(7) 0.0245(8) 0.0173(7) 0.0048(6) 0.0050(6) 0.0071(6) 
C7 0.0274(9) 0.0306(9) 0.0260(9) 0.0050(7) 0.0115(7) 0.0015(7) 
C8 0.0191(7) 0.0199(7) 0.0140(7) 0.0001(5) 0.0024(6) 0.0047(6) 
C9 0.0221(8) 0.0224(8) 0.0146(7) -0.0051(6) -0.0006(6) -0.0016(6) 
C10 0.0346(10) 0.0211(8) 0.0218(8) -0.0002(6) 0.0053(7) 0.0051(7) 
C11 0.0219(8) 0.0340(10) 0.0265(9) -0.0011(7) 0.0008(7) -0.0068(7) 
C12 0.0211(8) 0.0266(8) 0.0136(7) -0.0027(6) -0.0015(6) 0.0063(6) 
C13 0.0283(9) 0.0294(9) 0.0185(8) 0.0052(7) 0.0028(7) 0.0069(7) 
C14 0.0197(8) 0.0415(11) 0.0320(10) 0.0041(8) -0.0047(7) 0.0071(8) 
C15 0.0126(6) 0.0145(7) 0.0175(7) -0.0021(5) 0.0030(5) 0.0022(5) 
C16 0.0159(7) 0.0193(7) 0.0146(7) -0.0001(5) 0.0024(6) 0.0047(6) 
C17 0.0185(7) 0.0185(7) 0.0210(7) 0.0014(6) 0.0079(6) 0.0043(6) 
C18 0.0264(9) 0.0384(11) 0.0278(9) 0.0109(8) 0.0130(8) 0.0027(8) 
C19 0.0133(7) 0.0206(8) 0.0244(8) -0.0018(6) 0.0057(6) 0.0007(6) 
C20 0.0146(7) 0.0200(7) 0.0195(7) -0.0012(6) 0.0012(6) 0.0034(6) 
C21 0.0182(8) 0.0437(11) 0.0235(8) 0.0026(8) -0.0033(7) -0.0009(7) 
C22 0.0162(7) 0.0188(7) 0.0158(7) 0.0015(5) 0.0029(6) 0.0023(6) 
C23 0.0205(7) 0.0216(8) 0.0165(7) 0.0030(6) 0.0054(6) 0.0082(6) 
C24 0.0323(9) 0.0178(8) 0.0283(9) 0.0042(6) 0.0120(7) 0.0083(7) 
C25 0.0233(8) 0.0373(10) 0.0257(8) 0.0079(7) 0.0053(7) 0.0145(7) 
C26 0.0206(7) 0.0193(7) 0.0152(7) -0.0016(6) 0.0042(6) 0.0045(6) 
C27 0.0266(9) 0.0284(9) 0.0228(8) -0.0085(7) 0.0043(7) 0.0012(7) 
C28 0.0271(9) 0.0308(9) 0.0234(8) -0.0042(7) 0.0105(7) 0.0076(7) 
C29 0.0137(6) 0.0179(7) 0.0140(6) 0.0034(5) 0.0047(5) 0.0033(5) 
C30 0.0177(7) 0.0163(7) 0.0177(7) 0.0017(5) 0.0042(6) 0.0032(6) 
C31 0.0152(7) 0.0231(8) 0.0189(7) 0.0050(6) 0.0038(6) 0.0009(6) 
C32 0.0187(8) 0.0317(10) 0.0290(9) 0.0029(7) -0.0017(7) -0.0022(7) 
C33 0.0155(7) 0.0256(8) 0.0265(8) 0.0083(6) 0.0074(6) 0.0067(6) 
C34 0.0221(8) 0.0198(8) 0.0260(8) 0.0042(6) 0.0118(7) 0.0071(6) 
C35 0.0306(10) 0.0249(9) 0.0524(12) -0.0033(8) 0.0159(9) 0.0113(8) 
C36 0.0173(7) 0.0190(7) 0.0176(7) -0.0004(6) 0.0051(6) 0.0022(6) 
C37 0.0179(7) 0.0183(7) 0.0140(6) 0.0007(5) 0.0046(6) 0.0029(6) 
C38 0.0250(8) 0.0221(8) 0.0144(7) 0.0019(6) 0.0031(6) 0.0025(6) 
C39 0.0253(8) 0.0277(9) 0.0200(8) -0.0008(6) 0.0100(7) 0.0057(7) 
C40 0.0186(7) 0.0199(8) 0.0171(7) -0.0003(6) 0.0046(6) -0.0015(6) 
C41 0.0251(8) 0.0202(8) 0.0296(9) 0.0015(6) 0.0112(7) 0.0011(6) 
C42 0.0201(8) 0.0280(9) 0.0334(9) 0.0053(7) 0.0103(7) -0.0014(7) 

_refine_ls_extinction_method 
    'None'
_oxford_refine_ls_scale 0.13014(3) 
loop_
 _geom_bond_atom_site_label_1
 _geom_bond_site_symmetry_1
 _geom_bond_atom_site_label_2
 _geom_bond_site_symmetry_2
 _geom_bond_distance
 _geom_bond_publ_flag
Co1 . Ti1 . 2.2461(3)    yes
Co1 . P1 . 2.2229(4)    yes
Co1 . P2 . 2.2223(4)    yes
Co1 . P3 . 2.2207(4)    yes
Co1 . N5 . 1.857(8)    yes
Co1 . Ti1 . 2.2461(3)    yes
Co1 . P1 . 2.2229(4)    yes
Co1 . P2 . 2.2223(4)    yes
Co1 . P3 . 2.2207(4)    yes
Co1 . N7 . 1.870(7)    yes
Ti1 . P1 . 2.6565(5)    yes
Ti1 . P2 . 2.6738(5)    yes
Ti1 . P3 . 2.6946(5)    yes
Ti1 . N1 . 1.9955(12)    yes
Ti1 . N2 . 1.9778(13)    yes
Ti1 . N3 . 2.0053(13)    yes
Ti1 . N4 . 2.3438(14)    yes
P1 . N1 . 1.6851(13)    yes
P1 . C9 . 1.8770(17)    yes
P1 . C12 . 1.8691(16)    yes
P2 . N2 . 1.6786(13)    yes
P2 . C23 . 1.8607(16)    yes
P2 . C26 . 1.8671(16)    yes
P3 . N3 . 1.6763(13)    yes
P3 . C37 . 1.8645(15)    yes
P3 . C40 . 1.8626(16)    yes
N1 . C1 . 1.4025(19)    yes
N2 . C15 . 1.4110(19)    yes
N3 . C29 . 1.4115(19)    yes
N4 . H1 . 0.841(15)    no
N4 . H2 . 0.849(15)    no
N4 . H3 . 0.816(15)    no
N5 . N6 . 1.129(14)    yes
N7 . N8 . 1.059(9)    yes
C1 . C2 . 1.403(2)    yes
C1 . C8 . 1.401(2)    yes
C2 . C3 . 1.393(2)    yes
C2 . H21 . 0.952    no
C3 . C4 . 1.508(2)    yes
C3 . C5 . 1.391(2)    yes
C4 . H41 . 0.949    no
C4 . H42 . 0.947    no
C4 . H43 . 0.959    no
C5 . C6 . 1.392(2)    yes
C5 . H51 . 0.936    no
C6 . C7 . 1.498(2)    yes
C6 . C8 . 1.392(2)    yes
C7 . H71 . 0.930    no
C7 . H72 . 0.968    no
C7 . H73 . 0.972    no
C8 . H81 . 0.935    no
C9 . C10 . 1.531(2)    yes
C9 . C11 . 1.530(2)    yes
C9 . H91 . 0.976    no
C10 . H101 . 0.976    no
C10 . H102 . 0.947    no
C10 . H103 . 0.956    no
C11 . H111 . 0.970    no
C11 . H112 . 0.960    no
C11 . H113 . 0.956    no
C12 . C13 . 1.517(2)    yes
C12 . C14 . 1.524(2)    yes
C12 . H121 . 0.974    no
C13 . H131 . 0.953    no
C13 . H132 . 0.972    no
C13 . H133 . 0.972    no
C14 . H141 . 0.981    no
C14 . H142 . 0.971    no
C14 . H143 . 0.975    no
C15 . C16 . 1.395(2)    yes
C15 . C22 . 1.396(2)    yes
C16 . C17 . 1.395(2)    yes
C16 . H161 . 0.932    no
C17 . C18 . 1.505(2)    yes
C17 . C19 . 1.393(2)    yes
C18 . H181 . 0.953    no
C18 . H182 . 0.928    no
C18 . H183 . 0.938    no
C19 . C20 . 1.390(2)    yes
C19 . H191 . 0.945    no
C20 . C21 . 1.504(2)    yes
C20 . C22 . 1.387(2)    yes
C21 . H211 . 0.939    no
C21 . H212 . 0.948    no
C21 . H213 . 0.944    no
C22 . H221 . 0.950    no
C23 . C24 . 1.530(2)    yes
C23 . C25 . 1.533(2)    yes
C23 . H231 . 0.971    no
C24 . H241 . 0.969    no
C24 . H242 . 0.976    no
C24 . H243 . 0.955    no
C25 . H251 . 0.971    no
C25 . H252 . 0.962    no
C25 . H253 . 0.970    no
C26 . C27 . 1.531(2)    yes
C26 . C28 . 1.529(2)    yes
C26 . H261 . 0.993    no
C27 . H271 . 0.977    no
C27 . H272 . 0.968    no
C27 . H273 . 0.959    no
C28 . H281 . 0.990    no
C28 . H282 . 0.980    no
C28 . H283 . 0.990    no
C29 . C30 . 1.399(2)    yes
C29 . C36 . 1.397(2)    yes
C30 . C31 . 1.394(2)    yes
C30 . H301 . 0.945    no
C31 . C32 . 1.509(2)    yes
C31 . C33 . 1.387(2)    yes
C32 . H321 . 0.937    no
C32 . H322 . 0.933    no
C32 . H323 . 0.965    no
C33 . C34 . 1.388(2)    yes
C33 . H331 . 0.934    no
C34 . C35 . 1.503(2)    yes
C34 . C36 . 1.397(2)    yes
C35 . H351 . 0.921    no
C35 . H352 . 0.942    no
C35 . H353 . 0.946    no
C36 . H361 . 0.941    no
C37 . C38 . 1.529(2)    yes
C37 . C39 . 1.533(2)    yes
C37 . H371 . 0.978    no
C38 . H381 . 0.962    no
C38 . H382 . 0.972    no
C38 . H383 . 0.953    no
C39 . H391 . 0.964    no
C39 . H392 . 0.966    no
C39 . H393 . 0.969    no
C40 . C41 . 1.531(2)    yes
C40 . C42 . 1.527(2)    yes
C40 . H401 . 0.960    no
C41 . H411 . 0.968    no
C41 . H412 . 0.952    no
C41 . H413 . 0.973    no
C42 . H421 . 0.974    no
C42 . H422 . 0.972    no
C42 . H423 . 0.956    no
loop_
 _geom_angle_atom_site_label_1
 _geom_angle_site_symmetry_1
 _geom_angle_atom_site_label_2
 _geom_angle_site_symmetry_2
 _geom_angle_atom_site_label_3
 _geom_angle_site_symmetry_3
 _geom_angle
 _geom_angle_publ_flag
Ti1 . Co1 . P1 . 72.941(13)    yes
Ti1 . Co1 . P2 . 73.508(13)    yes
P1 . Co1 . P2 . 115.698(17)    yes
Ti1 . Co1 . P3 . 74.204(13)    yes
P1 . Co1 . P3 . 112.373(17)    yes
P2 . Co1 . P3 . 108.778(16)    yes
Ti1 . Co1 . N5 . 177.5(5)    yes
P1 . Co1 . N5 . 105.9(2)    yes
P2 . Co1 . N5 . 109.0(5)    yes
P3 . Co1 . N5 . 104.4(5)    yes
Ti1 . Co1 . P1 . 72.941(13)    yes
Ti1 . Co1 . P2 . 73.508(13)    yes
P1 . Co1 . P2 . 115.698(17)    yes
Ti1 . Co1 . P3 . 74.204(13)    yes
P1 . Co1 . P3 . 112.373(17)    yes
P2 . Co1 . P3 . 108.778(16)    yes
Ti1 . Co1 . N7 . 177.3(4)    yes
P1 . Co1 . N7 . 105.78(19)    yes
P2 . Co1 . N7 . 105.2(4)    yes
P3 . Co1 . N7 . 108.5(4)    yes
Co1 . Ti1 . P1 . 53.128(11)    yes
Co1 . Ti1 . P2 . 52.837(11)    yes
P1 . Ti1 . P2 . 89.830(14)    yes
Co1 . Ti1 . P3 . 52.468(11)    yes
P1 . Ti1 . P3 . 87.251(14)    yes
P2 . Ti1 . P3 . 84.572(14)    yes
Co1 . Ti1 . N1 . 92.03(4)    yes
P1 . Ti1 . N1 . 39.34(4)    yes
P2 . Ti1 . N1 . 113.29(4)    yes
P3 . Ti1 . N1 . 119.43(4)    yes
Co1 . Ti1 . N2 . 91.59(4)    yes
P1 . Ti1 . N2 . 119.24(4)    yes
P2 . Ti1 . N2 . 38.79(4)    yes
P3 . Ti1 . N2 . 109.69(4)    yes
N1 . Ti1 . N2 . 119.74(6)    yes
Co1 . Ti1 . N3 . 90.58(4)    yes
P1 . Ti1 . N3 . 110.25(4)    yes
P2 . Ti1 . N3 . 114.25(4)    yes
P3 . Ti1 . N3 . 38.38(4)    yes
N1 . Ti1 . N3 . 121.43(5)    yes
Co1 . Ti1 . N4 . 177.20(4)    yes
P1 . Ti1 . N4 . 128.99(4)    yes
P2 . Ti1 . N4 . 127.40(4)    yes
P3 . Ti1 . N4 . 124.89(4)    yes
N1 . Ti1 . N4 . 90.29(5)    yes
N2 . Ti1 . N3 . 118.65(5)    yes
N2 . Ti1 . N4 . 88.60(5)    yes
N3 . Ti1 . N4 . 86.88(5)    yes
Ti1 . P1 . Co1 . 53.930(11)    yes
Ti1 . P1 . N1 . 48.65(4)    yes
Co1 . P1 . N1 . 102.05(5)    yes
Ti1 . P1 . C9 . 121.48(5)    yes
Co1 . P1 . C9 . 119.02(5)    yes
N1 . P1 . C9 . 106.84(7)    yes
Ti1 . P1 . C12 . 134.60(6)    yes
Co1 . P1 . C12 . 123.71(5)    yes
N1 . P1 . C12 . 104.15(7)    yes
C9 . P1 . C12 . 99.41(7)    yes
Ti1 . P2 . Co1 . 53.654(11)    yes
Ti1 . P2 . N2 . 47.58(4)    yes
Co1 . P2 . N2 . 101.19(5)    yes
Ti1 . P2 . C23 . 124.44(5)    yes
Co1 . P2 . C23 . 119.39(5)    yes
N2 . P2 . C23 . 105.62(7)    yes
Ti1 . P2 . C26 . 126.77(5)    yes
Co1 . P2 . C26 . 115.11(5)    yes
N2 . P2 . C26 . 108.07(7)    yes
C23 . P2 . C26 . 106.46(7)    yes
Ti1 . P3 . Co1 . 53.328(11)    yes
Ti1 . P3 . N3 . 47.96(4)    yes
Co1 . P3 . N3 . 100.96(5)    yes
Ti1 . P3 . C37 . 121.34(5)    yes
Co1 . P3 . C37 . 118.49(5)    yes
N3 . P3 . C37 . 106.26(7)    yes
Ti1 . P3 . C40 . 130.60(5)    yes
Co1 . P3 . C40 . 116.03(5)    yes
N3 . P3 . C40 . 108.23(7)    yes
C37 . P3 . C40 . 105.99(7)    yes
P1 . N1 . Ti1 . 92.00(6)    yes
P1 . N1 . C1 . 130.72(10)    yes
Ti1 . N1 . C1 . 136.30(10)    yes
P2 . N2 . Ti1 . 93.63(6)    yes
P2 . N2 . C15 . 136.76(11)    yes
Ti1 . N2 . C15 . 129.61(10)    yes
P3 . N3 . Ti1 . 93.66(6)    yes
P3 . N3 . C29 . 135.29(11)    yes
Ti1 . N3 . C29 . 128.45(10)    yes
Ti1 . N4 . H1 . 110.5(12)    no
Ti1 . N4 . H2 . 114.3(11)    no
H1 . N4 . H2 . 103.7(14)    no
Ti1 . N4 . H3 . 113.4(12)    no
H1 . N4 . H3 . 104.5(14)    no
H2 . N4 . H3 . 109.6(14)    no
Co1 . N5 . N6 . 173.6(13)    yes
Co1 . N7 . N8 . 176.1(10)    yes
N1 . C1 . C2 . 124.08(15)    yes
N1 . C1 . C8 . 118.16(13)    yes
C2 . C1 . C8 . 117.73(14)    yes
C1 . C2 . C3 . 121.05(16)    yes
C1 . C2 . H21 . 119.5    no
C3 . C2 . H21 . 119.4    no
C2 . C3 . C4 . 120.09(16)    yes
C2 . C3 . C5 . 119.42(15)    yes
C4 . C3 . C5 . 120.49(15)    yes
C3 . C4 . H41 . 110.4    no
C3 . C4 . H42 . 111.6    no
H41 . C4 . H42 . 108.2    no
C3 . C4 . H43 . 111.6    no
H41 . C4 . H43 . 107.3    no
H42 . C4 . H43 . 107.6    no
C3 . C5 . C6 . 121.14(15)    yes
C3 . C5 . H51 . 119.1    no
C6 . C5 . H51 . 119.7    no
C5 . C6 . C7 . 121.66(15)    yes
C5 . C6 . C8 . 118.43(15)    yes
C7 . C6 . C8 . 119.90(15)    yes
C6 . C7 . H71 . 110.7    no
C6 . C7 . H72 . 109.8    no
H71 . C7 . H72 . 107.5    no
C6 . C7 . H73 . 112.4    no
H71 . C7 . H73 . 108.0    no
H72 . C7 . H73 . 108.3    no
C1 . C8 . C6 . 122.15(15)    yes
C1 . C8 . H81 . 119.1    no
C6 . C8 . H81 . 118.7    no
P1 . C9 . C10 . 111.39(11)    yes
P1 . C9 . C11 . 111.45(12)    yes
C10 . C9 . C11 . 111.44(15)    yes
P1 . C9 . H91 . 106.0    no
C10 . C9 . H91 . 107.5    no
C11 . C9 . H91 . 108.8    no
C9 . C10 . H101 . 110.9    no
C9 . C10 . H102 . 110.5    no
H101 . C10 . H102 . 108.3    no
C9 . C10 . H103 . 108.8    no
H101 . C10 . H103 . 108.9    no
H102 . C10 . H103 . 109.4    no
C9 . C11 . H111 . 111.2    no
C9 . C11 . H112 . 109.5    no
H111 . C11 . H112 . 107.0    no
C9 . C11 . H113 . 110.7    no
H111 . C11 . H113 . 108.2    no
H112 . C11 . H113 . 110.2    no
P1 . C12 . C13 . 111.96(11)    yes
P1 . C12 . C14 . 112.50(12)    yes
C13 . C12 . C14 . 110.19(15)    yes
P1 . C12 . H121 . 105.4    no
C13 . C12 . H121 . 108.2    no
C14 . C12 . H121 . 108.3    no
C12 . C13 . H131 . 109.0    no
C12 . C13 . H132 . 113.8    no
H131 . C13 . H132 . 106.8    no
C12 . C13 . H133 . 109.1    no
H131 . C13 . H133 . 107.4    no
H132 . C13 . H133 . 110.6    no
C12 . C14 . H141 . 109.9    no
C12 . C14 . H142 . 113.2    no
H141 . C14 . H142 . 108.1    no
C12 . C14 . H143 . 109.3    no
H141 . C14 . H143 . 108.0    no
H142 . C14 . H143 . 108.1    no
N2 . C15 . C16 . 121.34(13)    yes
N2 . C15 . C22 . 119.80(14)    yes
C16 . C15 . C22 . 118.49(14)    yes
C15 . C16 . C17 . 121.21(14)    yes
C15 . C16 . H161 . 119.6    no
C17 . C16 . H161 . 119.2    no
C16 . C17 . C18 . 121.04(15)    yes
C16 . C17 . C19 . 118.65(14)    yes
C18 . C17 . C19 . 120.31(15)    yes
C17 . C18 . H181 . 111.8    no
C17 . C18 . H182 . 113.3    no
H181 . C18 . H182 . 109.8    no
C17 . C18 . H183 . 109.1    no
H181 . C18 . H183 . 107.0    no
H182 . C18 . H183 . 105.5    no
C17 . C19 . C20 . 121.35(14)    yes
C17 . C19 . H191 . 119.0    no
C20 . C19 . H191 . 119.6    no
C19 . C20 . C21 . 121.09(15)    yes
C19 . C20 . C22 . 118.86(14)    yes
C21 . C20 . C22 . 120.05(15)    yes
C20 . C21 . H211 . 111.0    no
C20 . C21 . H212 . 111.6    no
H211 . C21 . H212 . 110.5    no
C20 . C21 . H213 . 109.0    no
H211 . C21 . H213 . 105.9    no
H212 . C21 . H213 . 108.7    no
C15 . C22 . C20 . 121.43(14)    yes
C15 . C22 . H221 . 118.9    no
C20 . C22 . H221 . 119.7    no
P2 . C23 . C24 . 116.94(11)    yes
P2 . C23 . C25 . 113.10(12)    yes
C24 . C23 . C25 . 110.37(14)    yes
P2 . C23 . H231 . 101.4    no
C24 . C23 . H231 . 107.9    no
C25 . C23 . H231 . 106.0    no
C23 . C24 . H241 . 108.9    no
C23 . C24 . H242 . 112.0    no
H241 . C24 . H242 . 108.5    no
C23 . C24 . H243 . 109.4    no
H241 . C24 . H243 . 107.9    no
H242 . C24 . H243 . 110.0    no
C23 . C25 . H251 . 112.1    no
C23 . C25 . H252 . 110.4    no
H251 . C25 . H252 . 109.1    no
C23 . C25 . H253 . 109.9    no
H251 . C25 . H253 . 106.9    no
H252 . C25 . H253 . 108.3    no
P2 . C26 . C27 . 119.60(12)    yes
P2 . C26 . C28 . 110.77(11)    yes
C27 . C26 . C28 . 109.95(14)    yes
P2 . C26 . H261 . 102.3    no
C27 . C26 . H261 . 106.8    no
C28 . C26 . H261 . 106.3    no
C26 . C27 . H271 . 109.1    no
C26 . C27 . H272 . 111.8    no
H271 . C27 . H272 . 108.3    no
C26 . C27 . H273 . 112.5    no
H271 . C27 . H273 . 106.9    no
H272 . C27 . H273 . 108.1    no
C26 . C28 . H281 . 109.0    no
C26 . C28 . H282 . 112.6    no
H281 . C28 . H282 . 108.4    no
C26 . C28 . H283 . 109.8    no
H281 . C28 . H283 . 108.7    no
H282 . C28 . H283 . 108.1    no
N3 . C29 . C30 . 120.99(14)    yes
N3 . C29 . C36 . 120.07(14)    yes
C30 . C29 . C36 . 118.47(14)    yes
C29 . C30 . C31 . 121.16(14)    yes
C29 . C30 . H301 . 118.5    no
C31 . C30 . H301 . 120.3    no
C30 . C31 . C32 . 119.97(15)    yes
C30 . C31 . C33 . 118.89(15)    yes
C32 . C31 . C33 . 121.11(15)    yes
C31 . C32 . H321 . 110.8    no
C31 . C32 . H322 . 110.7    no
H321 . C32 . H322 . 106.0    no
C31 . C32 . H323 . 112.8    no
H321 . C32 . H323 . 108.2    no
H322 . C32 . H323 . 108.0    no
C31 . C33 . C34 . 121.47(15)    yes
C31 . C33 . H331 . 119.7    no
C34 . C33 . H331 . 118.9    no
C33 . C34 . C35 . 120.88(16)    yes
C33 . C34 . C36 . 118.87(15)    yes
C35 . C34 . C36 . 120.24(16)    yes
C34 . C35 . H351 . 112.0    no
C34 . C35 . H352 . 112.5    no
H351 . C35 . H352 . 110.9    no
C34 . C35 . H353 . 112.0    no
H351 . C35 . H353 . 104.5    no
H352 . C35 . H353 . 104.3    no
C29 . C36 . C34 . 121.10(15)    yes
C29 . C36 . H361 . 118.4    no
C34 . C36 . H361 . 120.5    no
P3 . C37 . C38 . 116.62(11)    yes
P3 . C37 . C39 . 113.37(11)    yes
C38 . C37 . C39 . 110.17(13)    yes
P3 . C37 . H371 . 101.7    no
C38 . C37 . H371 . 106.6    no
C39 . C37 . H371 . 107.4    no
C37 . C38 . H381 . 108.2    no
C37 . C38 . H382 . 110.5    no
H381 . C38 . H382 . 109.0    no
C37 . C38 . H383 . 111.9    no
H381 . C38 . H383 . 108.4    no
H382 . C38 . H383 . 108.7    no
C37 . C39 . H391 . 112.0    no
C37 . C39 . H392 . 111.1    no
H391 . C39 . H392 . 106.8    no
C37 . C39 . H393 . 110.1    no
H391 . C39 . H393 . 108.1    no
H392 . C39 . H393 . 108.7    no
P3 . C40 . C41 . 118.85(11)    yes
P3 . C40 . C42 . 111.40(12)    yes
C41 . C40 . C42 . 110.81(14)    yes
P3 . C40 . H401 . 102.3    no
C41 . C40 . H401 . 105.5    no
C42 . C40 . H401 . 106.8    no
C40 . C41 . H411 . 110.9    no
C40 . C41 . H412 . 112.0    no
H411 . C41 . H412 . 109.1    no
C40 . C41 . H413 . 109.9    no
H411 . C41 . H413 . 106.9    no
H412 . C41 . H413 . 107.8    no
C40 . C42 . H421 . 110.5    no
C40 . C42 . H422 . 111.0    no
H421 . C42 . H422 . 110.5    no
C40 . C42 . H423 . 108.5    no
H421 . C42 . H423 . 108.4    no
H422 . C42 . H423 . 107.8    no


_iucr_refine_instructions_details
;
#
# Punched on 15/07/15 at 19:23:49
#
#LIST     12                                                                    
BLOCK 
CONT SCALE 
CONT CO   (    1 ,X'S,U'S)  UNTIL N    (    4 ) 
CONT N    (    5 ,X'S,U[ISO])  UNTIL N    (    8 ) 
CONT C    (    1 ,X'S,U'S)  UNTIL C    (   42 ) 
CONT H(1,X'S,U[ISO]) UNTIL H(3) 
SUMFIX PART(1001,OCC) AND PART(1002,OCC) 
RIDE C   (   2,X'S) H   (  21,X'S) 
RIDE C   (   4,X'S) H   (  41,X'S) H   (  42,X'S) H   (  43,X'S) 
RIDE C   (   5,X'S) H   (  51,X'S) 
RIDE C   (   7,X'S) H   (  71,X'S) H   (  72,X'S) H   (  73,X'S) 
RIDE C   (   8,X'S) H   (  81,X'S) 
RIDE C   (   9,X'S) H   (  91,X'S) 
RIDE C   (  10,X'S) H   ( 101,X'S) H   ( 102,X'S) H   ( 103,X'S) 
RIDE C   (  11,X'S) H   ( 111,X'S) H   ( 112,X'S) H   ( 113,X'S) 
RIDE C   (  12,X'S) H   ( 121,X'S) 
RIDE C   (  13,X'S) H   ( 131,X'S) H   ( 132,X'S) H   ( 133,X'S) 
RIDE C   (  14,X'S) H   ( 141,X'S) H   ( 142,X'S) H   ( 143,X'S) 
RIDE C   (  16,X'S) H   ( 161,X'S) 
RIDE C   (  18,X'S) H   ( 181,X'S) H   ( 182,X'S) H   ( 183,X'S) 
RIDE C   (  19,X'S) H   ( 191,X'S) 
RIDE C   (  21,X'S) H   ( 211,X'S) H   ( 212,X'S) H   ( 213,X'S) 
RIDE C   (  22,X'S) H   ( 221,X'S) 
RIDE C   (  23,X'S) H   ( 231,X'S) 
RIDE C   (  24,X'S) H   ( 241,X'S) H   ( 242,X'S) H   ( 243,X'S) 
RIDE C   (  25,X'S) H   ( 251,X'S) H   ( 252,X'S) H   ( 253,X'S) 
RIDE C   (  26,X'S) H   ( 261,X'S) 
RIDE C   (  27,X'S) H   ( 271,X'S) H   ( 272,X'S) H   ( 273,X'S) 
RIDE C   (  28,X'S) H   ( 281,X'S) H   ( 282,X'S) H   ( 283,X'S) 
RIDE C   (  30,X'S) H   ( 301,X'S) 
RIDE C   (  32,X'S) H   ( 321,X'S) H   ( 322,X'S) H   ( 323,X'S) 
RIDE C   (  33,X'S) H   ( 331,X'S) 
RIDE C   (  35,X'S) H   ( 351,X'S) H   ( 352,X'S) H   ( 353,X'S) 
RIDE C   (  36,X'S) H   ( 361,X'S) 
RIDE C   (  37,X'S) H   ( 371,X'S) 
RIDE C   (  38,X'S) H   ( 381,X'S) H   ( 382,X'S) H   ( 383,X'S) 
RIDE C   (  39,X'S) H   ( 391,X'S) H   ( 392,X'S) H   ( 393,X'S) 
RIDE C   (  40,X'S) H   ( 401,X'S) 
RIDE C   (  41,X'S) H   ( 411,X'S) H   ( 412,X'S) H   ( 413,X'S) 
RIDE C   (  42,X'S) H   ( 421,X'S) H   ( 422,X'S) H   ( 423,X'S) 
END                                                                             
#
# Punched on 15/07/15 at 19:23:49
#
#LIST     16                                                                    
DIST 0.89, 0.02 = 
CONT N ( 4) TO H(1) 
CONT N ( 4) TO H(2) 
CONT N ( 4) TO H(3) 
REST 0.028, 0.002 = H(1,U[ISO]) 
REST 0.028, 0.002 = H(2,U[ISO]) 
REST 0.028, 0.002 = H(3,U[ISO]) 
ANGLE 109.54, 2.0 = 
CONT TI(1) TO N ( 4) TO H(1) 
CONT TI(1) TO N ( 4) TO H(2) 
CONT TI(1) TO N ( 4) TO H(3) 
ANGLE 0.0, 2.0 = MEAN H(1) TO N ( 4) TO H(2) 
CONT H(1) TO N ( 4) TO H(3) 
CONT H(2) TO N ( 4) TO H(3) 
REM   HREST   START (DO NOT REMOVE THIS LINE) 
REM   HREST   END (DO NOT REMOVE THIS LINE) 
END                                                                             
;

####

data_7
_audit_creation_date        "2015-07-15"
_audit_creation_method CRYSTALS_ver_14.61

_oxford_structure_analysis_title  'bw_472_0m in P-1'
_chemical_name_systematic         ?
_chemical_melting_point           ?

_cell_length_a                    10.8002(5)
_cell_length_b                    12.0096(5)
_cell_length_c                    18.9465(8)
_cell_angle_alpha                 89.660(3)
_cell_angle_beta                  77.718(3)
_cell_angle_gamma                 79.127(2)
_cell_volume                      2356.62(10)
 
_symmetry_cell_setting            'triclinic' 
_symmetry_space_group_name_H-M    'P -1 ' 
_symmetry_space_group_name_Hall   '-P 1 ' 
loop_
 _symmetry_equiv_pos_as_xyz
 'x,y,z'
 '-x,-y,-z'

loop_
_atom_type_symbol
_atom_type_scat_dispersion_real
_atom_type_scat_dispersion_imag
_atom_type_scat_Cromer_Mann_a1
_atom_type_scat_Cromer_Mann_b1
_atom_type_scat_Cromer_Mann_a2
_atom_type_scat_Cromer_Mann_b2
_atom_type_scat_Cromer_Mann_a3
_atom_type_scat_Cromer_Mann_b3
_atom_type_scat_Cromer_Mann_a4
_atom_type_scat_Cromer_Mann_b4
_atom_type_scat_Cromer_Mann_c
_atom_type_scat_source  
 C       0.0033   0.0016   2.3100  20.8439   1.0200  10.2075   1.5886   0.5687
   0.8650  51.6512   0.2156 'International Tables Vol C 4.2.6.8 and 6.1.1.4'
 H       0.0000   0.0000   0.4930  10.5109   0.3229  26.1257   0.1402   3.1424
   0.0408  57.7998   0.0030 'International Tables Vol C 4.2.6.8 and 6.1.1.4'
 N       0.0061   0.0033  12.2126   0.0057   3.1322   9.8933   2.0125  28.9975
   1.1663   0.5826 -11.5290 'International Tables Vol C 4.2.6.8 and 6.1.1.4'
 P       0.1023   0.0942   6.4345   1.9067   4.1791  27.1570   1.7800   0.5260
   1.4908  68.1645   1.1149 'International Tables Vol C 4.2.6.8 and 6.1.1.4'
 Ti      0.2776   0.4457   9.7595   7.8508   7.3558   0.5000   1.6991  35.6338
   1.9021 116.1050   1.2807 'International Tables Vol C 4.2.6.8 and 6.1.1.4'
 Co      0.3494   0.9721  12.2841   4.2791   7.3409   0.2784   4.0034  13.5359
   2.3488  71.1692   1.0118 'International Tables Vol C 4.2.6.8 and 6.1.1.4'
 
 
_cell_formula_units_Z                    2

# Given Formula = C43 H74 Co1 N6 P3 Ti1 
# Dc =      1.23 Fooo =    936.00 Mu =      6.58 M =    874.86
# Found Formula = C43 H74 Co1 N6 P3 Ti1 
# Dc =      1.23 FOOO =    936.00 Mu =      6.58 M =    874.85

_chemical_formula_sum             'C43 H74 Co1 N6 P3 Ti1'
_chemical_formula_moiety          'C43 H74 Co1 N6 P3 Ti1'
_chemical_compound_source                ?
_chemical_formula_weight            874.85
 
 
_cell_measurement_reflns_used         9934
_cell_measurement_theta_min              2
_cell_measurement_theta_max             28
_cell_measurement_temperature          120
 
_exptl_crystal_description        'plate' 
_exptl_crystal_colour             'red' 
_exptl_crystal_size_min           0.050 
_exptl_crystal_size_mid           0.280 
_exptl_crystal_size_max           0.320 
 
_exptl_crystal_density_diffrn     1.233 
_exptl_crystal_density_meas       ? 
_exptl_crystal_density_method     'not measured' 
# Non-dispersive F(000): 
_exptl_crystal_F_000              936 
_exptl_absorpt_coefficient_mu     0.658 
 
# Sheldrick geometric approximatio 0.83 0.97 
_exptl_absorpt_correction_type    numerical 
_exptl_absorpt_process_details 
; 
 Analytical Absorption (De Meulenaer & Tompa, 1965) 
; 
_exptl_absorpt_correction_T_min   0.83 
_exptl_absorpt_correction_T_max   0.97 
_diffrn_measurement_device_type   'Bruker Kappa Apex2' 
_diffrn_measurement_device        'Area' 
_diffrn_radiation_monochromator   'graphite' 
_diffrn_radiation_type            'Mo K\a'
_diffrn_radiation_wavelength           0.71073
_diffrn_measurement_method        '\f & \w scans' 
 
# If a reference occurs more than once, delete the author 
# and date from subsequent references. 
_computing_data_collection        'Apex2 (Bruker AXS, 2006)' 
_computing_cell_refinement        'Apex2 (Bruker AXS, 2006)' 
_computing_data_reduction         'Apex2 (Bruker AXS, 2006)' 
_computing_structure_solution     'SIR92 (Altomare et al., 1994)' 
_computing_structure_refinement   'CRYSTALS (Betteridge et al., 2003)' 
_computing_publication_material   'CRYSTALS (Betteridge et al., 2003)' 
_computing_molecular_graphics     'CAMERON (Watkin et al., 1996)' 
 
_diffrn_standards_interval_time   . 
_diffrn_standards_interval_count  . 
_diffrn_standards_number          0 
_diffrn_standards_decay_%         ? 
 
_diffrn_ambient_temperature        120
_diffrn_reflns_number             42086 
_reflns_number_total              11394 
_diffrn_reflns_av_R_equivalents   0.035 
# Number of reflections without Friedels Law is 0 
# Number of reflections with Friedels Law is 11394 
# Theoretical number of reflections is about 23026 
 
 
_diffrn_reflns_theta_min          1.728 
_diffrn_reflns_theta_max          28.118 
_diffrn_measured_fraction_theta_max 0.989 
 
_diffrn_reflns_theta_full         27.556 
_diffrn_measured_fraction_theta_full 0.999 
 
 
_diffrn_reflns_limit_h_min        -14 
_diffrn_reflns_limit_h_max        14 
_diffrn_reflns_limit_k_min        -15 
_diffrn_reflns_limit_k_max        15 
_diffrn_reflns_limit_l_min        -25 
_diffrn_reflns_limit_l_max        25 
_reflns_limit_h_min               -13 
_reflns_limit_h_max               14 
_reflns_limit_k_min               -15 
_reflns_limit_k_max               15 
_reflns_limit_l_min               0 
_reflns_limit_l_max               25 
 
_oxford_diffrn_Wilson_B_factor    0.00 
_oxford_diffrn_Wilson_scale       0.00 
 
_atom_sites_solution_primary      direct #heavy,direct,difmap,geom,iterative
# _atom_sites_solution_secondary  difmap
_atom_sites_solution_hydrogens    difmap
 
_refine_diff_density_min          -0.79 
_refine_diff_density_max          1.56 
 
 
# The current dictionary definitions do not cover the 
# situation where the reflections used for refinement were 
# selected by a user-defined sigma threshold 
 
 
# The values actually used during refinement 
_oxford_reflns_threshold_expression_ref     I>-10.0\s(I)
_refine_ls_number_reflns          11394 
_refine_ls_number_restraints      0 
_refine_ls_number_parameters      494 
_oxford_refine_ls_R_factor_ref    0.0652 
_refine_ls_wR_factor_ref          0.1442 
_refine_ls_goodness_of_fit_ref    0.9886 
_refine_ls_shift/su_max           0.0018122 
_refine_ls_shift/su_mean          0.0000916 
 
 
# The values computed with all filters except I/sigma 
_oxford_reflns_number_all         11394 
_refine_ls_R_factor_all           0.0652 
_refine_ls_wR_factor_all          0.1442 
 
# The values computed with a 2 sigma cutoff - a la SHELX 
_reflns_threshold_expression      I>2.0\s(I)
_reflns_number_gt                 8850 
_refine_ls_R_factor_gt            0.0506 
_refine_ls_wR_factor_gt           0.1314 
 
# choose from: rm (reference molecule of known chirality), 
# ad (anomolous dispersion - Flack), rmad (rm and ad), 
# syn (from synthesis), unk (unknown) or . (not applicable). 
_chemical_absolute_configuration  '.' 
 
 
_refine_ls_structure_factor_coef  Fsqd 
_refine_ls_matrix_type            full
_refine_ls_hydrogen_treatment     mixed          #undef, noref, refall,
                                                 # refxyz, refU, constr or mixed
_refine_ls_weighting_scheme       calc 
_refine_ls_weighting_details 
;
 Method= Modified Sheldrick 
 w=1/[\s^2^(F^2^) + ( 0.07P)^2^ + 4.91P] 
 ,where P=(max(Fo^2^,0) + 2Fc^2^)/3 
;
# Insert your own references if required - in alphabetical order 
_publ_section_references 
; 
Altomare, A., Cascarano, G., Giacovazzo, C., Guagliardi, A., Burla, M.C., 
Polidori, G. & Camalli, M. (1994). J. Appl. Cryst. 27, 435. 
 
Betteridge, P.W., Carruthers, J.R., Cooper, R.I., 
Prout, K. & Watkin, D.J. (2003). J. Appl. Cryst. 36, 1487. 
 
Bruker Analytical X-ray Systems, Inc., 2006. <i>Apex2</i>, 
Version 2 User Manual, M86-E01078, Madison, WI. 
 
De Meulenaer, J. & Tompa, H. (1965). Acta Cryst. 19, 1014. 
 
Watkin, D.J., Prout, C.K. & Pearce, L.J. (1996). CAMERON, Chemical 
Crystallography Laboratory, Oxford, UK. 
; 

# Uequiv = arithmetic mean of Ui i.e. Ueqiv = (U1+U2+U3)/3

# Replace last . with number of unfound hydrogen atoms attached to an atom.

# ..._refinement_flags_... 
# . no refinement constraints           S special position constraint on site
# G rigid group refinement of site      R riding atom
# D distance or angle restraint on site T thermal displacement constraints
# U Uiso or Uij restraint (rigid bond)  P partial occupancy constraint


loop_
_atom_site_label
_atom_site_type_symbol
_atom_site_fract_x
_atom_site_fract_y
_atom_site_fract_z
_atom_site_U_iso_or_equiv
_atom_site_occupancy
_atom_site_adp_type
_atom_site_refinement_flags_posn
_atom_site_refinement_flags_adp
_atom_site_refinement_flags_occupancy
_atom_site_disorder_assembly
_atom_site_disorder_group
_atom_site_attached_hydrogens
Co1 Co 0.78355(3) 0.26284(3) 0.759023(18) 0.0188 1.0000 Uani . . . . . . 
Ti1 Ti 0.58408(4) 0.26708(4) 0.73714(2) 0.0180 1.0000 Uani . . . . . . 
P1 P 0.69559(6) 0.14378(6) 0.83452(3) 0.0176 1.0000 Uani . . . . . . 
P2 P 0.81044(6) 0.22011(7) 0.64295(4) 0.0242 1.0000 Uani . . . . . . 
P3 P 0.67337(6) 0.43868(6) 0.78479(4) 0.0200 1.0000 Uani . . . . . . 
N1 N 0.5502(2) 0.15542(19) 0.81444(12) 0.0208 1.0000 Uani . . . . . . 
N2 N 0.6577(2) 0.2290(2) 0.63253(12) 0.0244 1.0000 Uani . . . . . . 
N3 N 0.5331(2) 0.43161(18) 0.76239(12) 0.0191 1.0000 Uani . . . . . . 
N4 N 0.3722(2) 0.2732(2) 0.72348(14) 0.0270 1.0000 Uani . . . . . . 
N5 N 0.9441(6) 0.2709(10) 0.7796(4) 0.014(2) 0.50(6) Uiso . . P 1 1 . 
N6 N 1.0333(6) 0.2807(13) 0.7924(5) 0.016(2) 0.50(6) Uiso . . P 1 1 . 
N7 N 0.9459(9) 0.2515(15) 0.7746(6) 0.037(3) 0.50(6) Uiso . . P 1 2 . 
N8 N 1.0401(7) 0.2543(16) 0.7832(6) 0.023(2) 0.50(6) Uiso . . P 1 2 . 
C1 C 0.4391(2) 0.1111(2) 0.84429(14) 0.0189 1.0000 Uani . . . . . . 
C2 C 0.3381(2) 0.1772(2) 0.89375(14) 0.0216 1.0000 Uani . . . . . . 
C3 C 0.2229(2) 0.1406(2) 0.91987(15) 0.0246 1.0000 Uani . . . . . . 
C4 C 0.1151(3) 0.2155(3) 0.97293(18) 0.0378 1.0000 Uani . . . . . . 
C5 C 0.2088(3) 0.0365(3) 0.89569(17) 0.0286 1.0000 Uani . . . . . . 
C6 C 0.3072(3) -0.0317(2) 0.84642(17) 0.0281 1.0000 Uani . . . . . . 
C7 C 0.2891(4) -0.1445(3) 0.8206(2) 0.0450 1.0000 Uani . . . . . . 
C8 C 0.4217(3) 0.0069(2) 0.82106(15) 0.0238 1.0000 Uani . . . . . . 
C9 C 0.6725(3) 0.1812(3) 0.93233(14) 0.0253 1.0000 Uani . . . . . . 
C10 C 0.5816(3) 0.1268(2) 0.98863(14) 0.0241 1.0000 Uani . . . . . . 
C11 C 0.8065(3) 0.1621(3) 0.95367(18) 0.0400 1.0000 Uani . . . . . . 
C12 C 0.7717(3) -0.0100(2) 0.82319(16) 0.0278 1.0000 Uani . . . . . . 
C13 C 0.7149(3) -0.0918(2) 0.87645(17) 0.0304 1.0000 Uani . . . . . . 
C14 C 0.9171(3) -0.0322(3) 0.8104(2) 0.0460 1.0000 Uani . . . . . . 
C15 C 0.6033(3) 0.2357(3) 0.57121(15) 0.0283 1.0000 Uani . . . . . . 
C16 C 0.6315(3) 0.1479(3) 0.51910(17) 0.0367 1.0000 Uani . . . . . . 
C17 C 0.5649(4) 0.1548(4) 0.46286(18) 0.0464 1.0000 Uani . . . . . . 
C18 C 0.5959(5) 0.0570(5) 0.4081(2) 0.0674 1.0000 Uani . . . . . . 
C19 C 0.4700(4) 0.2495(4) 0.4600(2) 0.0501 1.0000 Uani . . . . . . 
C20 C 0.4412(3) 0.3373(4) 0.50986(19) 0.0440 1.0000 Uani . . . . . . 
C21 C 0.3360(4) 0.4385(4) 0.5066(3) 0.0691 1.0000 Uani . . . . . . 
C22 C 0.5095(3) 0.3309(3) 0.56456(17) 0.0356 1.0000 Uani . . . . . . 
C23 C 0.9033(3) 0.0843(3) 0.59830(17) 0.0378 1.0000 Uani . . . . . . 
C24 C 0.8454(4) -0.0144(3) 0.6254(2) 0.0528 1.0000 Uani . . . . . . 
C25 C 1.0475(4) 0.0677(4) 0.6029(2) 0.0524 1.0000 Uani . . . . . . 
C26 C 0.8757(3) 0.3285(3) 0.58143(16) 0.0347 1.0000 Uani . . . . . . 
C27 C 0.9003(3) 0.3002(3) 0.50043(17) 0.0430 1.0000 Uani . . . . . . 
C28 C 0.9900(4) 0.3694(4) 0.6017(2) 0.0470 1.0000 Uani . . . . . . 
C29 C 0.4088(2) 0.5016(2) 0.77450(14) 0.0185 1.0000 Uani . . . . . . 
C30 C 0.3690(3) 0.5673(2) 0.71946(15) 0.0219 1.0000 Uani . . . . . . 
C31 C 0.2424(3) 0.6276(2) 0.72862(16) 0.0255 1.0000 Uani . . . . . . 
C32 C 0.2005(3) 0.6982(3) 0.66871(19) 0.0409 1.0000 Uani . . . . . . 
C33 C 0.1560(3) 0.6209(2) 0.79327(16) 0.0258 1.0000 Uani . . . . . . 
C34 C 0.1928(3) 0.5554(2) 0.84850(16) 0.0251 1.0000 Uani . . . . . . 
C35 C 0.0975(3) 0.5474(3) 0.91836(19) 0.0428 1.0000 Uani . . . . . . 
C36 C 0.3194(2) 0.4967(2) 0.83884(15) 0.0224 1.0000 Uani . . . . . . 
C37 C 0.7394(3) 0.5540(3) 0.7332(2) 0.0353 1.0000 Uani . . . . . . 
C38 C 0.6519(3) 0.6682(3) 0.73051(18) 0.0338 1.0000 Uani . . . . . . 
C39 C 0.8629(3) 0.5739(3) 0.7583(2) 0.0435 1.0000 Uani . . . . . . 
C40 C 0.6301(3) 0.4863(3) 0.88288(16) 0.0297 1.0000 Uani . . . . . . 
C41 C 0.5515(3) 0.6050(3) 0.90268(18) 0.0326 1.0000 Uani . . . . . . 
C42 C 0.7420(3) 0.4619(3) 0.92163(19) 0.0404 1.0000 Uani . . . . . . 
C43 C 0.3393(4) 0.1827(3) 0.6866(2) 0.0451 1.0000 Uani . . . . . . 
H1 H 0.325(5) 0.340(4) 0.702(3) 0.072(15) 1.0000 Uiso . . . . . . 
H2 H 0.325(4) 0.283(4) 0.765(3) 0.060(13) 1.0000 Uiso . . . . . . 
H21 H 0.3483 0.2478 0.9099 0.0262 1.0000 Uiso R . . . . . 
H41 H 0.0625 0.2664 0.9481 0.0570 1.0000 Uiso R . . . . . 
H42 H 0.1491 0.2587 1.0040 0.0566 1.0000 Uiso R . . . . . 
H43 H 0.0624 0.1701 1.0026 0.0567 1.0000 Uiso R . . . . . 
H51 H 0.1325 0.0112 0.9130 0.0339 1.0000 Uiso R . . . . . 
H71 H 0.2940 -0.1985 0.8571 0.0676 1.0000 Uiso R . . . . . 
H72 H 0.3546 -0.1726 0.7793 0.0673 1.0000 Uiso R . . . . . 
H73 H 0.2080 -0.1379 0.8074 0.0674 1.0000 Uiso R . . . . . 
H81 H 0.4866 -0.0362 0.7870 0.0284 1.0000 Uiso R . . . . . 
H91 H 0.6406 0.2604 0.9359 0.0301 1.0000 Uiso R . . . . . 
H101 H 0.6168 0.0492 0.9939 0.0361 1.0000 Uiso R . . . . . 
H102 H 0.5007 0.1306 0.9759 0.0370 1.0000 Uiso R . . . . . 
H103 H 0.5664 0.1660 1.0347 0.0360 1.0000 Uiso R . . . . . 
H111 H 0.7954 0.2067 0.9979 0.0602 1.0000 Uiso R . . . . . 
H112 H 0.8371 0.0800 0.9607 0.0607 1.0000 Uiso R . . . . . 
H113 H 0.8691 0.1909 0.9163 0.0599 1.0000 Uiso R . . . . . 
H121 H 0.7543 -0.0312 0.7761 0.0330 1.0000 Uiso R . . . . . 
H131 H 0.7480 -0.1693 0.8592 0.0456 1.0000 Uiso R . . . . . 
H132 H 0.7406 -0.0839 0.9217 0.0459 1.0000 Uiso R . . . . . 
H133 H 0.6222 -0.0776 0.8859 0.0459 1.0000 Uiso R . . . . . 
H141 H 0.9512 0.0191 0.7743 0.0691 1.0000 Uiso R . . . . . 
H142 H 0.9521 -0.1112 0.7937 0.0691 1.0000 Uiso R . . . . . 
H143 H 0.9417 -0.0168 0.8560 0.0661 1.0000 Uiso R . . . . . 
H161 H 0.6902 0.0832 0.5222 0.0433 1.0000 Uiso R . . . . . 
H181 H 0.6732 0.0598 0.3729 0.1031 1.0000 Uiso R . . . . . 
H182 H 0.6088 -0.0146 0.4314 0.1030 1.0000 Uiso R . . . . . 
H183 H 0.5281 0.0597 0.3832 0.1034 1.0000 Uiso R . . . . . 
H191 H 0.4253 0.2541 0.4228 0.0601 1.0000 Uiso R . . . . . 
H211 H 0.3027 0.4249 0.4659 0.1034 1.0000 Uiso R . . . . . 
H212 H 0.3706 0.5070 0.5013 0.1030 1.0000 Uiso R . . . . . 
H213 H 0.2689 0.4420 0.5484 0.1033 1.0000 Uiso R . . . . . 
H221 H 0.4925 0.3913 0.5987 0.0435 1.0000 Uiso R . . . . . 
H231 H 0.9000 0.0907 0.5471 0.0459 1.0000 Uiso R . . . . . 
H241 H 0.8783 -0.0781 0.5909 0.0793 1.0000 Uiso R . . . . . 
H242 H 0.8692 -0.0364 0.6713 0.0787 1.0000 Uiso R . . . . . 
H243 H 0.7521 0.0046 0.6324 0.0774 1.0000 Uiso R . . . . . 
H251 H 1.0907 -0.0076 0.5829 0.0781 1.0000 Uiso R . . . . . 
H252 H 1.0859 0.1276 0.5758 0.0784 1.0000 Uiso R . . . . . 
H253 H 1.0510 0.0708 0.6536 0.0776 1.0000 Uiso R . . . . . 
H261 H 0.8032 0.3938 0.5895 0.0418 1.0000 Uiso R . . . . . 
H271 H 0.8271 0.2761 0.4876 0.0635 1.0000 Uiso R . . . . . 
H272 H 0.9153 0.3662 0.4733 0.0640 1.0000 Uiso R . . . . . 
H273 H 0.9763 0.2397 0.4868 0.0639 1.0000 Uiso R . . . . . 
H281 H 1.0681 0.3092 0.5878 0.0689 1.0000 Uiso R . . . . . 
H282 H 0.9716 0.3857 0.6544 0.0704 1.0000 Uiso R . . . . . 
H283 H 1.0055 0.4394 0.5750 0.0701 1.0000 Uiso R . . . . . 
H301 H 0.4265 0.5698 0.6773 0.0260 1.0000 Uiso R . . . . . 
H321 H 0.2718 0.6969 0.6294 0.0608 1.0000 Uiso R . . . . . 
H322 H 0.1382 0.6668 0.6515 0.0617 1.0000 Uiso R . . . . . 
H323 H 0.1657 0.7743 0.6844 0.0621 1.0000 Uiso R . . . . . 
H331 H 0.0710 0.6614 0.7993 0.0307 1.0000 Uiso R . . . . . 
H351 H 0.1109 0.5963 0.9542 0.0646 1.0000 Uiso R . . . . . 
H352 H 0.0136 0.5715 0.9110 0.0643 1.0000 Uiso R . . . . . 
H353 H 0.1080 0.4723 0.9356 0.0648 1.0000 Uiso R . . . . . 
H361 H 0.3449 0.4508 0.8759 0.0273 1.0000 Uiso R . . . . . 
H371 H 0.7646 0.5253 0.6839 0.0408 1.0000 Uiso R . . . . . 
H381 H 0.5721 0.6578 0.7204 0.0507 1.0000 Uiso R . . . . . 
H382 H 0.6349 0.7102 0.7759 0.0514 1.0000 Uiso R . . . . . 
H383 H 0.6937 0.7118 0.6925 0.0507 1.0000 Uiso R . . . . . 
H391 H 0.9210 0.5012 0.7626 0.0648 1.0000 Uiso R . . . . . 
H392 H 0.8348 0.6163 0.8060 0.0653 1.0000 Uiso R . . . . . 
H393 H 0.9094 0.6175 0.7212 0.0650 1.0000 Uiso R . . . . . 
H401 H 0.5704 0.4360 0.9049 0.0359 1.0000 Uiso R . . . . . 
H411 H 0.4821 0.6213 0.8780 0.0487 1.0000 Uiso R . . . . . 
H412 H 0.6065 0.6588 0.8905 0.0485 1.0000 Uiso R . . . . . 
H413 H 0.5172 0.6108 0.9542 0.0486 1.0000 Uiso R . . . . . 
H421 H 0.8011 0.5154 0.9047 0.0586 1.0000 Uiso R . . . . . 
H422 H 0.7087 0.4712 0.9743 0.0604 1.0000 Uiso R . . . . . 
H423 H 0.7897 0.3831 0.9098 0.0601 1.0000 Uiso R . . . . . 
H431 H 0.3661 0.1104 0.7112 0.0675 1.0000 Uiso R . . . . . 
H432 H 0.3892 0.1772 0.6357 0.0674 1.0000 Uiso R . . . . . 
H433 H 0.2427 0.1973 0.6890 0.0675 1.0000 Uiso R . . . . . 
loop_
_atom_site_aniso_label
_atom_site_aniso_U_11
_atom_site_aniso_U_22
_atom_site_aniso_U_33
_atom_site_aniso_U_23
_atom_site_aniso_U_13
_atom_site_aniso_U_12
Co1 0.01251(16) 0.02562(19) 0.01779(17) 0.00272(13) -0.00409(12) -0.00197(13) 
Ti1 0.0145(2) 0.0218(2) 0.0172(2) 0.00134(17) -0.00279(16) -0.00256(17) 
P1 0.0135(3) 0.0220(3) 0.0173(3) 0.0013(2) -0.0047(2) -0.0018(2) 
P2 0.0149(3) 0.0385(4) 0.0164(3) 0.0021(3) -0.0021(2) 0.0003(3) 
P3 0.0134(3) 0.0230(3) 0.0252(3) 0.0012(3) -0.0060(2) -0.0054(2) 
N1 0.0163(10) 0.0241(11) 0.0240(11) 0.0055(9) -0.0075(8) -0.0056(8) 
N2 0.0172(10) 0.0378(13) 0.0174(10) -0.0008(9) -0.0047(8) -0.0018(9) 
N3 0.0138(9) 0.0223(11) 0.0220(10) 0.0007(8) -0.0062(8) -0.0026(8) 
N4 0.0195(11) 0.0385(14) 0.0258(12) 0.0014(11) -0.0098(10) -0.0068(10) 
C1 0.0171(11) 0.0204(12) 0.0218(12) 0.0053(10) -0.0086(9) -0.0049(9) 
C2 0.0197(12) 0.0228(13) 0.0237(13) 0.0024(10) -0.0085(10) -0.0037(10) 
C3 0.0166(12) 0.0308(14) 0.0264(13) 0.0083(11) -0.0068(10) -0.0023(10) 
C4 0.0216(14) 0.048(2) 0.0364(17) 0.0043(15) -0.0003(12) 0.0036(13) 
C5 0.0182(12) 0.0372(16) 0.0362(16) 0.0133(13) -0.0135(11) -0.0119(11) 
C6 0.0311(15) 0.0245(14) 0.0368(16) 0.0079(12) -0.0203(12) -0.0113(11) 
C7 0.050(2) 0.0318(17) 0.063(2) 0.0012(16) -0.0232(18) -0.0195(16) 
C8 0.0231(13) 0.0221(13) 0.0273(13) 0.0000(10) -0.0099(11) -0.0021(10) 
C9 0.0294(14) 0.0300(14) 0.0177(12) -0.0006(10) -0.0031(10) -0.0107(11) 
C10 0.0254(13) 0.0292(14) 0.0188(12) 0.0039(10) -0.0053(10) -0.0076(11) 
C11 0.0345(17) 0.061(2) 0.0293(16) 0.0055(15) -0.0104(13) -0.0178(16) 
C12 0.0273(14) 0.0250(14) 0.0277(14) 0.0024(11) -0.0043(11) 0.0020(11) 
C13 0.0329(15) 0.0220(14) 0.0358(16) 0.0020(12) -0.0102(13) -0.0009(11) 
C14 0.0297(17) 0.0407(19) 0.062(2) 0.0040(17) -0.0085(16) 0.0054(14) 
C15 0.0220(13) 0.0469(18) 0.0186(13) 0.0053(12) -0.0052(10) -0.0123(12) 
C16 0.0299(15) 0.058(2) 0.0260(15) 0.0003(14) -0.0066(12) -0.0170(15) 
C17 0.045(2) 0.081(3) 0.0225(15) 0.0005(16) -0.0080(14) -0.035(2) 
C18 0.071(3) 0.110(4) 0.035(2) -0.015(2) -0.0152(19) -0.047(3) 
C19 0.0419(19) 0.088(3) 0.0371(19) 0.030(2) -0.0255(16) -0.036(2) 
C20 0.0394(18) 0.064(2) 0.0383(18) 0.0236(17) -0.0208(15) -0.0207(17) 
C21 0.054(2) 0.086(3) 0.082(3) 0.044(3) -0.044(2) -0.017(2) 
C22 0.0297(15) 0.0494(19) 0.0297(15) 0.0109(14) -0.0101(12) -0.0091(14) 
C23 0.0347(16) 0.0474(19) 0.0247(15) -0.0138(13) -0.0074(12) 0.0102(14) 
C24 0.072(3) 0.046(2) 0.0324(18) -0.0179(16) -0.0123(18) 0.0110(19) 
C25 0.0361(19) 0.065(3) 0.046(2) -0.0164(19) -0.0064(16) 0.0134(18) 
C26 0.0269(14) 0.056(2) 0.0225(14) 0.0088(13) -0.0056(11) -0.0113(14) 
C27 0.0396(18) 0.063(2) 0.0231(15) 0.0103(15) -0.0020(13) -0.0078(17) 
C28 0.0373(18) 0.071(3) 0.0357(18) 0.0095(17) -0.0059(14) -0.0195(18) 
C29 0.0145(11) 0.0198(12) 0.0222(12) -0.0004(9) -0.0055(9) -0.0036(9) 
C30 0.0192(12) 0.0242(13) 0.0238(13) 0.0026(10) -0.0063(10) -0.0058(10) 
C31 0.0231(13) 0.0243(13) 0.0326(15) 0.0000(11) -0.0157(11) -0.0023(11) 
C32 0.0371(17) 0.0464(19) 0.0397(18) 0.0085(15) -0.0193(15) 0.0029(15) 
C33 0.0142(11) 0.0265(14) 0.0368(15) -0.0047(11) -0.0091(11) -0.0001(10) 
C34 0.0170(12) 0.0275(14) 0.0300(14) -0.0049(11) -0.0020(10) -0.0053(10) 
C35 0.0247(15) 0.054(2) 0.0414(19) 0.0000(16) 0.0075(13) -0.0032(14) 
C36 0.0186(12) 0.0237(13) 0.0247(13) 0.0018(10) -0.0033(10) -0.0047(10) 
C37 0.0267(15) 0.0310(16) 0.0477(19) 0.0087(14) -0.0018(13) -0.0114(12) 
C38 0.0351(16) 0.0317(16) 0.0405(17) 0.0083(13) -0.0157(14) -0.0125(13) 
C39 0.0351(17) 0.050(2) 0.051(2) 0.0078(17) -0.0117(16) -0.0181(16) 
C40 0.0322(15) 0.0296(15) 0.0295(15) -0.0076(12) -0.0140(12) -0.0025(12) 
C41 0.0318(15) 0.0294(15) 0.0354(16) -0.0056(12) -0.0053(13) -0.0048(12) 
C42 0.0389(18) 0.051(2) 0.0354(17) -0.0029(15) -0.0136(14) -0.0124(15) 
C43 0.048(2) 0.049(2) 0.0419(19) -0.0062(16) -0.0118(16) -0.0156(17) 

_refine_ls_extinction_method 
    'None'
_oxford_refine_ls_scale 0.12644(5) 
loop_
 _geom_bond_atom_site_label_1
 _geom_bond_site_symmetry_1
 _geom_bond_atom_site_label_2
 _geom_bond_site_symmetry_2
 _geom_bond_distance
 _geom_bond_publ_flag
Co1 . Ti1 . 2.2703(5)    yes
Co1 . P1 . 2.2143(7)    yes
Co1 . P2 . 2.2067(8)    yes
Co1 . P3 . 2.2206(8)    yes
Co1 . N5 . 1.876(7)    yes
Co1 . Ti1 . 2.2703(5)    yes
Co1 . P1 . 2.2143(7)    yes
Co1 . P2 . 2.2067(8)    yes
Co1 . P3 . 2.2206(8)    yes
Co1 . N7 . 1.820(10)    yes
Ti1 . P1 . 2.6996(8)    yes
Ti1 . P2 . 2.6674(8)    yes
Ti1 . P3 . 2.6711(8)    yes
Ti1 . N1 . 2.003(2)    yes
Ti1 . N2 . 1.993(2)    yes
Ti1 . N3 . 1.981(2)    yes
Ti1 . N4 . 2.345(2)    yes
P1 . N1 . 1.673(2)    yes
P1 . C9 . 1.863(3)    yes
P1 . C12 . 1.867(3)    yes
P2 . N2 . 1.686(2)    yes
P2 . C23 . 1.849(3)    yes
P2 . C26 . 1.878(3)    yes
P3 . N3 . 1.674(2)    yes
P3 . C37 . 1.854(3)    yes
P3 . C40 . 1.882(3)    yes
N1 . C1 . 1.411(3)    yes
N2 . C15 . 1.405(3)    yes
N3 . C29 . 1.417(3)    yes
N4 . C43 . 1.434(4)    yes
N4 . H1 . 1.00(5)    no
N4 . H2 . 0.84(5)    no
N5 . N6 . 1.069(8)    yes
N7 . N8 . 1.070(11)    yes
C1 . C2 . 1.395(4)    yes
C1 . C8 . 1.388(4)    yes
C2 . C3 . 1.388(4)    yes
C2 . H21 . 0.937    no
C3 . C4 . 1.514(4)    yes
C3 . C5 . 1.380(4)    yes
C4 . H41 . 0.947    no
C4 . H42 . 0.957    no
C4 . H43 . 0.957    no
C5 . C6 . 1.389(4)    yes
C5 . H51 . 0.926    no
C6 . C7 . 1.503(4)    yes
C6 . C8 . 1.392(4)    yes
C7 . H71 . 0.947    no
C7 . H72 . 0.951    no
C7 . H73 . 0.951    no
C8 . H81 . 0.922    no
C9 . C10 . 1.522(4)    yes
C9 . C11 . 1.560(4)    yes
C9 . H91 . 0.946    no
C10 . H101 . 0.951    no
C10 . H102 . 0.947    no
C10 . H103 . 0.961    no
C11 . H111 . 0.971    no
C11 . H112 . 0.996    no
C11 . H113 . 0.980    no
C12 . C13 . 1.521(4)    yes
C12 . C14 . 1.509(4)    yes
C12 . H121 . 0.994    no
C13 . H131 . 0.963    no
C13 . H132 . 0.966    no
C13 . H133 . 0.961    no
C14 . H141 . 0.978    no
C14 . H142 . 0.980    no
C14 . H143 . 0.984    no
C15 . C16 . 1.393(5)    yes
C15 . C22 . 1.402(4)    yes
C16 . C17 . 1.401(4)    yes
C16 . H161 . 0.916    no
C17 . C18 . 1.512(6)    yes
C17 . C19 . 1.389(6)    yes
C18 . H181 . 0.957    no
C18 . H182 . 0.965    no
C18 . H183 . 0.947    no
C19 . C20 . 1.366(6)    yes
C19 . H191 . 0.932    no
C20 . C21 . 1.510(6)    yes
C20 . C22 . 1.388(4)    yes
C21 . H211 . 0.945    no
C21 . H212 . 0.962    no
C21 . H213 . 0.949    no
C22 . H221 . 0.940    no
C23 . C24 . 1.482(6)    yes
C23 . C25 . 1.554(5)    yes
C23 . H231 . 0.979    no
C24 . H241 . 0.971    no
C24 . H242 . 0.978    no
C24 . H243 . 0.970    no
C25 . H251 . 0.973    no
C25 . H252 . 0.985    no
C25 . H253 . 0.971    no
C26 . C27 . 1.530(4)    yes
C26 . C28 . 1.532(5)    yes
C26 . H261 . 0.985    no
C27 . H271 . 0.968    no
C27 . H272 . 0.963    no
C27 . H273 . 0.977    no
C28 . H281 . 0.991    no
C28 . H282 . 0.988    no
C28 . H283 . 1.000    no
C29 . C30 . 1.396(4)    yes
C29 . C36 . 1.393(4)    yes
C30 . C31 . 1.397(4)    yes
C30 . H301 . 0.906    no
C31 . C32 . 1.508(4)    yes
C31 . C33 . 1.385(4)    yes
C32 . H321 . 0.948    no
C32 . H322 . 0.944    no
C32 . H323 . 0.944    no
C33 . C34 . 1.386(4)    yes
C33 . H331 . 0.938    no
C34 . C35 . 1.509(4)    yes
C34 . C36 . 1.391(4)    yes
C35 . H351 . 0.951    no
C35 . H352 . 0.937    no
C35 . H353 . 0.952    no
C36 . H361 . 0.945    no
C37 . C38 . 1.520(4)    yes
C37 . C39 . 1.566(5)    yes
C37 . H371 . 0.963    no
C38 . H381 . 0.952    no
C38 . H382 . 0.965    no
C38 . H383 . 0.971    no
C39 . H391 . 0.988    no
C39 . H392 . 1.000    no
C39 . H393 . 0.982    no
C40 . C41 . 1.519(4)    yes
C40 . C42 . 1.525(4)    yes
C40 . H401 . 0.992    no
C41 . H411 . 0.954    no
C41 . H412 . 0.953    no
C41 . H413 . 0.965    no
C42 . H421 . 0.994    no
C42 . H422 . 0.985    no
C42 . H423 . 0.990    no
C43 . H431 . 1.005    no
C43 . H432 . 0.995    no
C43 . H433 . 1.016    no
loop_
 _geom_angle_atom_site_label_1
 _geom_angle_site_symmetry_1
 _geom_angle_atom_site_label_2
 _geom_angle_site_symmetry_2
 _geom_angle_atom_site_label_3
 _geom_angle_site_symmetry_3
 _geom_angle
 _geom_angle_publ_flag
Ti1 . Co1 . P1 . 74.01(2)    yes
Ti1 . Co1 . P2 . 73.13(2)    yes
P1 . Co1 . P2 . 115.81(3)    yes
Ti1 . Co1 . P3 . 72.98(2)    yes
P1 . Co1 . P3 . 110.17(3)    yes
P2 . Co1 . P3 . 110.48(3)    yes
Ti1 . Co1 . N5 . 175.6(4)    yes
P1 . Co1 . N5 . 107.7(2)    yes
P2 . Co1 . N5 . 109.1(3)    yes
P3 . Co1 . N5 . 102.6(4)    yes
Ti1 . Co1 . P1 . 74.01(2)    yes
Ti1 . Co1 . P2 . 73.13(2)    yes
P1 . Co1 . P2 . 115.81(3)    yes
Ti1 . Co1 . P3 . 72.98(2)    yes
P1 . Co1 . P3 . 110.17(3)    yes
P2 . Co1 . P3 . 110.48(3)    yes
Ti1 . Co1 . N7 . 176.9(6)    yes
P1 . Co1 . N7 . 104.7(4)    yes
P2 . Co1 . N7 . 105.2(4)    yes
P3 . Co1 . N7 . 110.1(6)    yes
Co1 . Ti1 . P1 . 52.047(19)    yes
Co1 . Ti1 . P2 . 52.34(2)    yes
P1 . Ti1 . P2 . 88.50(2)    yes
Co1 . Ti1 . P3 . 52.650(19)    yes
P1 . Ti1 . P3 . 85.24(2)    yes
P2 . Ti1 . P3 . 85.89(3)    yes
Co1 . Ti1 . N1 . 90.23(6)    yes
P1 . Ti1 . N1 . 38.19(6)    yes
P2 . Ti1 . N1 . 116.95(7)    yes
P3 . Ti1 . N1 . 111.25(7)    yes
Co1 . Ti1 . N2 . 91.48(7)    yes
P1 . Ti1 . N2 . 118.05(7)    yes
P2 . Ti1 . N2 . 39.16(7)    yes
P3 . Ti1 . N2 . 112.30(8)    yes
N1 . Ti1 . N2 . 125.81(10)    yes
Co1 . Ti1 . N3 . 91.32(6)    yes
P1 . Ti1 . N3 . 114.04(6)    yes
P2 . Ti1 . N3 . 111.17(7)    yes
P3 . Ti1 . N3 . 38.73(6)    yes
N1 . Ti1 . N3 . 119.27(9)    yes
Co1 . Ti1 . N4 . 175.90(7)    yes
P1 . Ti1 . N4 . 125.19(7)    yes
P2 . Ti1 . N4 . 131.73(7)    yes
P3 . Ti1 . N4 . 125.77(7)    yes
N1 . Ti1 . N4 . 87.03(9)    yes
N2 . Ti1 . N3 . 114.83(10)    yes
N2 . Ti1 . N4 . 92.60(9)    yes
N3 . Ti1 . N4 . 87.36(9)    yes
Ti1 . P1 . Co1 . 53.944(19)    yes
Ti1 . P1 . N1 . 47.73(8)    yes
Co1 . P1 . N1 . 101.67(8)    yes
Ti1 . P1 . C9 . 126.49(10)    yes
Co1 . P1 . C9 . 115.41(9)    yes
N1 . P1 . C9 . 108.49(12)    yes
Ti1 . P1 . C12 . 125.50(10)    yes
Co1 . P1 . C12 . 118.00(10)    yes
N1 . P1 . C12 . 106.52(13)    yes
C9 . P1 . C12 . 106.06(13)    yes
Ti1 . P2 . Co1 . 54.53(2)    yes
Ti1 . P2 . N2 . 48.29(8)    yes
Co1 . P2 . N2 . 102.81(8)    yes
Ti1 . P2 . C23 . 130.77(12)    yes
Co1 . P2 . C23 . 124.39(11)    yes
N2 . P2 . C23 . 106.32(14)    yes
Ti1 . P2 . C26 . 122.75(11)    yes
Co1 . P2 . C26 . 114.04(11)    yes
N2 . P2 . C26 . 104.77(13)    yes
C23 . P2 . C26 . 102.83(16)    yes
Ti1 . P3 . Co1 . 54.37(2)    yes
Ti1 . P3 . N3 . 47.76(8)    yes
Co1 . P3 . N3 . 102.05(8)    yes
Ti1 . P3 . C37 . 129.05(12)    yes
Co1 . P3 . C37 . 117.23(11)    yes
N3 . P3 . C37 . 107.68(13)    yes
Ti1 . P3 . C40 . 121.76(10)    yes
Co1 . P3 . C40 . 116.47(10)    yes
N3 . P3 . C40 . 105.55(12)    yes
C37 . P3 . C40 . 106.82(15)    yes
P1 . N1 . Ti1 . 94.08(10)    yes
P1 . N1 . C1 . 133.65(18)    yes
Ti1 . N1 . C1 . 132.08(17)    yes
P2 . N2 . Ti1 . 92.55(10)    yes
P2 . N2 . C15 . 132.58(19)    yes
Ti1 . N2 . C15 . 133.12(18)    yes
P3 . N3 . Ti1 . 93.50(10)    yes
P3 . N3 . C29 . 135.47(18)    yes
Ti1 . N3 . C29 . 128.92(17)    yes
Ti1 . N4 . C43 . 121.1(2)    yes
Ti1 . N4 . H1 . 121(3)    no
C43 . N4 . H1 . 101(3)    no
Ti1 . N4 . H2 . 106(3)    no
C43 . N4 . H2 . 109(3)    no
H1 . N4 . H2 . 96(4)    no
Co1 . N5 . N6 . 176.6(7)    yes
Co1 . N7 . N8 . 174.0(9)    yes
N1 . C1 . C2 . 119.7(2)    yes
N1 . C1 . C8 . 121.8(2)    yes
C2 . C1 . C8 . 118.2(2)    yes
C1 . C2 . C3 . 121.6(3)    yes
C1 . C2 . H21 . 119.3    no
C3 . C2 . H21 . 119.2    no
C2 . C3 . C4 . 119.9(3)    yes
C2 . C3 . C5 . 118.7(3)    yes
C4 . C3 . C5 . 121.4(3)    yes
C3 . C4 . H41 . 110.6    no
C3 . C4 . H42 . 111.0    no
H41 . C4 . H42 . 108.6    no
C3 . C4 . H43 . 110.2    no
H41 . C4 . H43 . 108.6    no
H42 . C4 . H43 . 107.9    no
C3 . C5 . C6 . 121.4(3)    yes
C3 . C5 . H51 . 119.4    no
C6 . C5 . H51 . 119.2    no
C5 . C6 . C7 . 120.4(3)    yes
C5 . C6 . C8 . 118.7(3)    yes
C7 . C6 . C8 . 120.9(3)    yes
C6 . C7 . H71 . 110.7    no
C6 . C7 . H72 . 110.5    no
H71 . C7 . H72 . 108.0    no
C6 . C7 . H73 . 110.9    no
H71 . C7 . H73 . 108.9    no
H72 . C7 . H73 . 107.8    no
C6 . C8 . C1 . 121.4(3)    yes
C6 . C8 . H81 . 119.7    no
C1 . C8 . H81 . 118.9    no
P1 . C9 . C10 . 120.22(19)    yes
P1 . C9 . C11 . 109.4(2)    yes
C10 . C9 . C11 . 108.0(2)    yes
P1 . C9 . H91 . 104.3    no
C10 . C9 . H91 . 107.4    no
C11 . C9 . H91 . 106.6    no
C9 . C10 . H101 . 111.3    no
C9 . C10 . H102 . 111.3    no
H101 . C10 . H102 . 108.0    no
C9 . C10 . H103 . 109.9    no
H101 . C10 . H103 . 108.4    no
H102 . C10 . H103 . 107.8    no
C9 . C11 . H111 . 106.9    no
C9 . C11 . H112 . 110.4    no
H111 . C11 . H112 . 111.2    no
C9 . C11 . H113 . 109.9    no
H111 . C11 . H113 . 107.8    no
H112 . C11 . H113 . 110.6    no
P1 . C12 . C13 . 118.4(2)    yes
P1 . C12 . C14 . 113.8(2)    yes
C13 . C12 . C14 . 111.4(3)    yes
P1 . C12 . H121 . 102.4    no
C13 . C12 . H121 . 104.9    no
C14 . C12 . H121 . 104.0    no
C12 . C13 . H131 . 110.9    no
C12 . C13 . H132 . 109.2    no
H131 . C13 . H132 . 106.9    no
C12 . C13 . H133 . 112.3    no
H131 . C13 . H133 . 109.3    no
H132 . C13 . H133 . 108.1    no
C12 . C14 . H141 . 109.7    no
C12 . C14 . H142 . 109.8    no
H141 . C14 . H142 . 109.9    no
C12 . C14 . H143 . 108.6    no
H141 . C14 . H143 . 108.4    no
H142 . C14 . H143 . 110.4    no
N2 . C15 . C16 . 122.8(3)    yes
N2 . C15 . C22 . 118.8(3)    yes
C16 . C15 . C22 . 118.2(3)    yes
C15 . C16 . C17 . 120.2(3)    yes
C15 . C16 . H161 . 121.1    no
C17 . C16 . H161 . 118.6    no
C16 . C17 . C18 . 118.9(4)    yes
C16 . C17 . C19 . 119.3(4)    yes
C18 . C17 . C19 . 121.8(3)    yes
C17 . C18 . H181 . 111.2    no
C17 . C18 . H182 . 110.7    no
H181 . C18 . H182 . 107.6    no
C17 . C18 . H183 . 110.5    no
H181 . C18 . H183 . 107.7    no
H182 . C18 . H183 . 109.0    no
C17 . C19 . C20 . 121.8(3)    yes
C17 . C19 . H191 . 119.5    no
C20 . C19 . H191 . 118.7    no
C19 . C20 . C21 . 121.0(3)    yes
C19 . C20 . C22 . 118.6(4)    yes
C21 . C20 . C22 . 120.5(4)    yes
C20 . C21 . H211 . 106.1    no
C20 . C21 . H212 . 110.5    no
H211 . C21 . H212 . 110.4    no
C20 . C21 . H213 . 109.3    no
H211 . C21 . H213 . 108.3    no
H212 . C21 . H213 . 112.0    no
C15 . C22 . C20 . 121.9(3)    yes
C15 . C22 . H221 . 118.3    no
C20 . C22 . H221 . 119.8    no
P2 . C23 . C24 . 112.8(2)    yes
P2 . C23 . C25 . 111.1(2)    yes
C24 . C23 . C25 . 111.9(3)    yes
P2 . C23 . H231 . 105.8    no
C24 . C23 . H231 . 107.5    no
C25 . C23 . H231 . 107.2    no
C23 . C24 . H241 . 109.8    no
C23 . C24 . H242 . 109.3    no
H241 . C24 . H242 . 108.6    no
C23 . C24 . H243 . 110.3    no
H241 . C24 . H243 . 109.2    no
H242 . C24 . H243 . 109.7    no
C23 . C25 . H251 . 108.3    no
C23 . C25 . H252 . 108.7    no
H251 . C25 . H252 . 111.6    no
C23 . C25 . H253 . 107.9    no
H251 . C25 . H253 . 108.3    no
H252 . C25 . H253 . 111.9    no
P2 . C26 . C27 . 115.8(3)    yes
P2 . C26 . C28 . 114.2(2)    yes
C27 . C26 . C28 . 111.8(3)    yes
P2 . C26 . H261 . 103.0    no
C27 . C26 . H261 . 104.0    no
C28 . C26 . H261 . 106.7    no
C26 . C27 . H271 . 111.6    no
C26 . C27 . H272 . 110.0    no
H271 . C27 . H272 . 107.6    no
C26 . C27 . H273 . 109.4    no
H271 . C27 . H273 . 109.2    no
H272 . C27 . H273 . 109.1    no
C26 . C28 . H281 . 108.8    no
C26 . C28 . H282 . 109.7    no
H281 . C28 . H282 . 109.6    no
C26 . C28 . H283 . 109.7    no
H281 . C28 . H283 . 108.9    no
H282 . C28 . H283 . 110.0    no
N3 . C29 . C30 . 120.6(2)    yes
N3 . C29 . C36 . 120.4(2)    yes
C30 . C29 . C36 . 118.7(2)    yes
C29 . C30 . C31 . 120.9(3)    yes
C29 . C30 . H301 . 118.9    no
C31 . C30 . H301 . 120.2    no
C30 . C31 . C32 . 120.4(3)    yes
C30 . C31 . C33 . 119.0(3)    yes
C32 . C31 . C33 . 120.6(3)    yes
C31 . C32 . H321 . 110.1    no
C31 . C32 . H322 . 109.4    no
H321 . C32 . H322 . 107.3    no
C31 . C32 . H323 . 111.8    no
H321 . C32 . H323 . 108.7    no
H322 . C32 . H323 . 109.5    no
C31 . C33 . C34 . 121.3(2)    yes
C31 . C33 . H331 . 118.9    no
C34 . C33 . H331 . 119.9    no
C33 . C34 . C35 . 120.9(3)    yes
C33 . C34 . C36 . 119.1(3)    yes
C35 . C34 . C36 . 120.0(3)    yes
C34 . C35 . H351 . 109.2    no
C34 . C35 . H352 . 108.9    no
H351 . C35 . H352 . 108.4    no
C34 . C35 . H353 . 111.7    no
H351 . C35 . H353 . 108.0    no
H352 . C35 . H353 . 110.6    no
C29 . C36 . C34 . 121.1(3)    yes
C29 . C36 . H361 . 119.2    no
C34 . C36 . H361 . 119.6    no
P3 . C37 . C38 . 119.6(2)    yes
P3 . C37 . C39 . 110.1(2)    yes
C38 . C37 . C39 . 108.7(3)    yes
P3 . C37 . H371 . 104.6    no
C38 . C37 . H371 . 104.7    no
C39 . C37 . H371 . 108.5    no
C37 . C38 . H381 . 110.2    no
C37 . C38 . H382 . 110.8    no
H381 . C38 . H382 . 108.9    no
C37 . C38 . H383 . 109.2    no
H381 . C38 . H383 . 108.9    no
H382 . C38 . H383 . 108.7    no
C37 . C39 . H391 . 111.3    no
C37 . C39 . H392 . 108.2    no
H391 . C39 . H392 . 110.1    no
C37 . C39 . H393 . 107.7    no
H391 . C39 . H393 . 108.1    no
H392 . C39 . H393 . 111.4    no
P3 . C40 . C41 . 117.9(2)    yes
P3 . C40 . C42 . 114.5(2)    yes
C41 . C40 . C42 . 110.9(3)    yes
P3 . C40 . H401 . 102.8    no
C41 . C40 . H401 . 103.7    no
C42 . C40 . H401 . 105.2    no
C40 . C41 . H411 . 111.4    no
C40 . C41 . H412 . 109.1    no
H411 . C41 . H412 . 109.6    no
C40 . C41 . H413 . 108.8    no
H411 . C41 . H413 . 109.4    no
H412 . C41 . H413 . 108.6    no
C40 . C42 . H421 . 108.4    no
C40 . C42 . H422 . 109.8    no
H421 . C42 . H422 . 110.6    no
C40 . C42 . H423 . 109.7    no
H421 . C42 . H423 . 109.2    no
H422 . C42 . H423 . 109.1    no
N4 . C43 . H431 . 107.6    no
N4 . C43 . H432 . 108.3    no
H431 . C43 . H432 . 109.2    no
N4 . C43 . H433 . 110.1    no
H431 . C43 . H433 . 110.2    no
H432 . C43 . H433 . 111.4    no


_iucr_refine_instructions_details
;
#
# Punched on 15/07/15 at 15: 5: 0
#
#LIST     12                                                                    
BLOCK 
CONT SCALE 
CONT CO   (    1 ,X'S,U'S)  UNTIL N    (    4 ) 
CONT N    (    5 ,X'S,U[ISO])  UNTIL N    (    8 ) 
CONT C    (    1 ,X'S,U'S)  UNTIL C    (   43 ) 
CONT H(1,X'S,U[ISO]) UNTIL H(2) 
SUMFIX PART(1001,OCC) AND PART(1002,OCC) 
RIDE C   (   2,X'S) H   (  21,X'S) 
RIDE C   (   4,X'S) H   (  41,X'S) H   (  42,X'S) H   (  43,X'S) 
RIDE C   (   5,X'S) H   (  51,X'S) 
RIDE C   (   7,X'S) H   (  71,X'S) H   (  72,X'S) H   (  73,X'S) 
RIDE C   (   8,X'S) H   (  81,X'S) 
RIDE C   (   9,X'S) H   (  91,X'S) 
RIDE C   (  10,X'S) H   ( 101,X'S) H   ( 102,X'S) H   ( 103,X'S) 
RIDE C   (  11,X'S) H   ( 111,X'S) H   ( 112,X'S) H   ( 113,X'S) 
RIDE C   (  12,X'S) H   ( 121,X'S) 
RIDE C   (  13,X'S) H   ( 131,X'S) H   ( 132,X'S) H   ( 133,X'S) 
RIDE C   (  14,X'S) H   ( 141,X'S) H   ( 142,X'S) H   ( 143,X'S) 
RIDE C   (  16,X'S) H   ( 161,X'S) 
RIDE C   (  18,X'S) H   ( 181,X'S) H   ( 182,X'S) H   ( 183,X'S) 
RIDE C   (  19,X'S) H   ( 191,X'S) 
RIDE C   (  21,X'S) H   ( 211,X'S) H   ( 212,X'S) H   ( 213,X'S) 
RIDE C   (  22,X'S) H   ( 221,X'S) 
RIDE C   (  23,X'S) H   ( 231,X'S) 
RIDE C   (  24,X'S) H   ( 241,X'S) H   ( 242,X'S) H   ( 243,X'S) 
RIDE C   (  25,X'S) H   ( 251,X'S) H   ( 252,X'S) H   ( 253,X'S) 
RIDE C   (  26,X'S) H   ( 261,X'S) 
RIDE C   (  27,X'S) H   ( 271,X'S) H   ( 272,X'S) H   ( 273,X'S) 
RIDE C   (  28,X'S) H   ( 281,X'S) H   ( 282,X'S) H   ( 283,X'S) 
RIDE C   (  30,X'S) H   ( 301,X'S) 
RIDE C   (  32,X'S) H   ( 321,X'S) H   ( 322,X'S) H   ( 323,X'S) 
RIDE C   (  33,X'S) H   ( 331,X'S) 
RIDE C   (  35,X'S) H   ( 351,X'S) H   ( 352,X'S) H   ( 353,X'S) 
RIDE C   (  36,X'S) H   ( 361,X'S) 
RIDE C   (  37,X'S) H   ( 371,X'S) 
RIDE C   (  38,X'S) H   ( 381,X'S) H   ( 382,X'S) H   ( 383,X'S) 
RIDE C   (  39,X'S) H   ( 391,X'S) H   ( 392,X'S) H   ( 393,X'S) 
RIDE C   (  40,X'S) H   ( 401,X'S) 
RIDE C   (  41,X'S) H   ( 411,X'S) H   ( 412,X'S) H   ( 413,X'S) 
RIDE C   (  42,X'S) H   ( 421,X'S) H   ( 422,X'S) H   ( 423,X'S) 
RIDE C   (  43,X'S) H   ( 431,X'S) H   ( 432,X'S) H   ( 433,X'S) 
END                                                                             
#
# Punched on 15/07/15 at 15: 5: 0
#
#LIST     16                                                                    
NO 
END                                                                             
;

#===END

data_8
_audit_creation_date        "2015-10-03"
_audit_creation_method CRYSTALS_ver_14.61_build_00000

_vrf_PLAT201_8 
;
PROBLEM: Isotropic non-H Atoms in Main Residue(s).... 6 Report
RESPONSE: Disordered isopropyl C atoms were refined by using 
isotropic displacement parameters.
; 

_oxford_structure_analysis_title  'bw_410_0m in P2(1)/n'
_chemical_name_systematic         ?
_chemical_melting_point           ?

_cell_length_a                    13.3722(3)
_cell_length_b                    17.4691(4)
_cell_length_c                    46.0249(10)
_cell_angle_alpha                 90
_cell_angle_beta                  95.4090(15)
_cell_angle_gamma                 90
_cell_volume                      10703.6(4)
 
_symmetry_cell_setting            'monoclinic' 
_symmetry_space_group_name_H-M    'P 1 21/n 1 ' 
_symmetry_space_group_name_Hall   '-P 2yn'
loop_
 _symmetry_equiv_pos_as_xyz
 'x,y,z'
 '-x,-y,-z'
 '-x+1/2,y+1/2,-z+1/2'
 'x+1/2,-y+1/2,z+1/2'

loop_
_atom_type_symbol
_atom_type_scat_dispersion_real
_atom_type_scat_dispersion_imag
_atom_type_scat_Cromer_Mann_a1
_atom_type_scat_Cromer_Mann_b1
_atom_type_scat_Cromer_Mann_a2
_atom_type_scat_Cromer_Mann_b2
_atom_type_scat_Cromer_Mann_a3
_atom_type_scat_Cromer_Mann_b3
_atom_type_scat_Cromer_Mann_a4
_atom_type_scat_Cromer_Mann_b4
_atom_type_scat_Cromer_Mann_c
_atom_type_scat_source  
 C       0.0033   0.0016   2.3100  20.8439   1.0200  10.2075   1.5886   0.5687
   0.8650  51.6512   0.2156 'International Tables Vol C 4.2.6.8 and 6.1.1.4'
 H       0.0000   0.0000   0.4930  10.5109   0.3229  26.1257   0.1402   3.1424
   0.0408  57.7998   0.0030 'International Tables Vol C 4.2.6.8 and 6.1.1.4'
 N       0.0061   0.0033  12.2126   0.0057   3.1322   9.8933   2.0125  28.9975
   1.1663   0.5826 -11.5290 'International Tables Vol C 4.2.6.8 and 6.1.1.4'
 P       0.1023   0.0942   6.4345   1.9067   4.1791  27.1570   1.7800   0.5260
   1.4908  68.1645   1.1149 'International Tables Vol C 4.2.6.8 and 6.1.1.4'
 Ti      0.2776   0.4457   9.7595   7.8508   7.3558   0.5000   1.6991  35.6338
   1.9021 116.1050   1.2807 'International Tables Vol C 4.2.6.8 and 6.1.1.4'
 Co      0.3494   0.9721  12.2841   4.2791   7.3409   0.2784   4.0034  13.5359
   2.3488  71.1692   1.0118 'International Tables Vol C 4.2.6.8 and 6.1.1.4'
 
 
_cell_formula_units_Z                    8

# Given Formula = C54 H79 Co1 N6 P3 Ti1 
# Dc =      1.26 Fooo =   4312.00 Mu =      5.90 M =   1012.02
# Found Formula = C54 H79 Co1 N6 P3 Ti1 
# Dc =      1.26 FOOO =   4312.00 Mu =      5.90 M =   1012.01

_chemical_formula_sum             'C54 H79 Co1 N6 P3 Ti1'
_chemical_formula_moiety          'C54 H79 Co1 N6 P3 Ti1'
_chemical_compound_source                ?
_chemical_formula_weight           1012.01
 
 
_cell_measurement_reflns_used         8889
_cell_measurement_theta_min              2
_cell_measurement_theta_max             23
_cell_measurement_temperature          120
 
_exptl_crystal_description        'prism' 
_exptl_crystal_colour             'brown' 
_exptl_crystal_size_min           0.060 
_exptl_crystal_size_mid           0.110 
_exptl_crystal_size_max           0.370 
 
_exptl_crystal_density_diffrn     1.256 
_exptl_crystal_density_meas       ? 
_exptl_crystal_density_method     'not measured' 
# Non-dispersive F(000): 
_exptl_crystal_F_000              4312 
_exptl_absorpt_coefficient_mu     0.590 
 
# Sheldrick geometric approximatio 0.94 0.97 
_exptl_absorpt_correction_type    numerical 
_exptl_absorpt_process_details 
; 
 Analytical Absorption (De Meulenaer & Tompa, 1965) 
; 
_exptl_absorpt_correction_T_min   0.94 
_exptl_absorpt_correction_T_max   0.97 
_diffrn_measurement_device_type   'Bruker Kappa Apex2' 
_diffrn_measurement_device        'Area' 
_diffrn_radiation_monochromator   'graphite' 
_diffrn_radiation_type            'Mo K\a'
_diffrn_radiation_wavelength           0.71073
_diffrn_measurement_method        '\f & \w scans' 
 
# If a reference occurs more than once, delete the author 
# and date from subsequent references. 
_computing_data_collection        'Apex2 (Bruker AXS, 2006)' 
_computing_cell_refinement        'Apex2 (Bruker AXS, 2006)' 
_computing_data_reduction         'Apex2 (Bruker AXS, 2006)' 
_computing_structure_solution     'SIR92 (Altomare et al., 1994)' 
_computing_structure_refinement   'CRYSTALS (Betteridge et al., 2003)' 
_computing_publication_material   'CRYSTALS (Betteridge et al., 2003)' 
_computing_molecular_graphics     'CAMERON (Watkin et al., 1996)' 
 
_diffrn_standards_interval_time   . 
_diffrn_standards_interval_count  . 
_diffrn_standards_number          0 
_diffrn_standards_decay_%         ? 
 
_diffrn_ambient_temperature        120
_diffrn_reflns_number             118269 
_reflns_number_total              21023 
_diffrn_reflns_av_R_equivalents   0.122 
# Number of reflections without Friedels Law is 0 
# Number of reflections with Friedels Law is 21023 
# Theoretical number of reflections is about 42202 
 
 
_diffrn_reflns_theta_min          1.771 
_diffrn_reflns_theta_max          26.027 
_diffrn_measured_fraction_theta_max 0.995 
 
_diffrn_reflns_theta_full         26.027 
_diffrn_measured_fraction_theta_full 0.995 
 
 
_diffrn_reflns_limit_h_min        -16 
_diffrn_reflns_limit_h_max        16 
_diffrn_reflns_limit_k_min        -19 
_diffrn_reflns_limit_k_max        21 
_diffrn_reflns_limit_l_min        -56 
_diffrn_reflns_limit_l_max        56 
_reflns_limit_h_min               -16 
_reflns_limit_h_max               16 
_reflns_limit_k_min               0 
_reflns_limit_k_max               21 
_reflns_limit_l_min               0 
_reflns_limit_l_max               56 
 
_oxford_diffrn_Wilson_B_factor    1.69 
_oxford_diffrn_Wilson_scale       1066.65 
 
_atom_sites_solution_primary      direct #heavy,direct,difmap,geom,iterative
# _atom_sites_solution_secondary  difmap
_atom_sites_solution_hydrogens    difmap
 
_refine_diff_density_min          -1.06 
_refine_diff_density_max          1.79 
 
 
# The current dictionary definitions do not cover the 
# situation where the reflections used for refinement were 
# selected by a user-defined sigma threshold 
 
 
# The values actually used during refinement 
_oxford_reflns_threshold_expression_ref     I>-10.0\s(I)
_refine_ls_number_reflns          21023 
_refine_ls_number_restraints      0 
_refine_ls_number_parameters      1159 
_oxford_refine_ls_R_factor_ref    0.0995 
_refine_ls_wR_factor_ref          0.1229 
_refine_ls_goodness_of_fit_ref    1.0003 
_refine_ls_shift/su_max           0.0099771 
_refine_ls_shift/su_mean          0.0001930 
 
 
# The values computed with all filters except I/sigma 
_oxford_reflns_number_all         21023 
_refine_ls_R_factor_all           0.0995 
_refine_ls_wR_factor_all          0.1229 
 
# The values computed with a 2 sigma cutoff - a la SHELX 
_reflns_threshold_expression      I>2.0\s(I)
_reflns_number_gt                 12977 
_refine_ls_R_factor_gt            0.0518 
_refine_ls_wR_factor_gt           0.1063 
 
# choose from: rm (reference molecule of known chirality), 
# ad (anomolous dispersion - Flack), rmad (rm and ad), 
# syn (from synthesis), unk (unknown) or . (not applicable). 
_chemical_absolute_configuration  '.' 
 
 
_refine_ls_structure_factor_coef  Fsqd 
_refine_ls_matrix_type            full
_refine_ls_hydrogen_treatment     constr         #undef, noref, refall,
                                                 # refxyz, refU, constr or mixed
_refine_ls_weighting_scheme       calc 
_refine_ls_weighting_details 
;
 Method= Modified Sheldrick 
 w=1/[\s^2^(F^2^) + ( 0.05P)^2^ +15.04P] 
 ,where P=(max(Fo^2^,0) + 2Fc^2^)/3 
;
# Insert your own references if required - in alphabetical order 
_publ_section_references 
; 
Altomare, A., Cascarano, G., Giacovazzo, C., Guagliardi, A., Burla, M.C., 
Polidori, G. & Camalli, M. (1994). J. Appl. Cryst. 27, 435. 
 
Betteridge, P.W., Carruthers, J.R., Cooper, R.I., 
Prout, K. & Watkin, D.J. (2003). J. Appl. Cryst. 36, 1487. 
 
Bruker Analytical X-ray Systems, Inc., 2006. <i>Apex2</i>, 
Version 2 User Manual, M86-E01078, Madison, WI. 
 
De Meulenaer, J. & Tompa, H. (1965). Acta Cryst. 19, 1014. 
 
Watkin, D.J., Prout, C.K. & Pearce, L.J. (1996). CAMERON, Chemical 
Crystallography Laboratory, Oxford, UK. 
; 

# Uequiv = arithmetic mean of Ui i.e. Ueqiv = (U1+U2+U3)/3

# Replace last . with number of unfound hydrogen atoms attached to an atom.

# ..._refinement_flags_... 
# . no refinement constraints           S special position constraint on site
# G rigid group refinement of site      R riding atom
# D distance or angle restraint on site T thermal displacement constraints
# U Uiso or Uij restraint (rigid bond)  P partial occupancy constraint


loop_
_atom_site_label
_atom_site_type_symbol
_atom_site_fract_x
_atom_site_fract_y
_atom_site_fract_z
_atom_site_U_iso_or_equiv
_atom_site_occupancy
_atom_site_adp_type
_atom_site_refinement_flags_posn
_atom_site_refinement_flags_adp
_atom_site_refinement_flags_occupancy
_atom_site_disorder_assembly
_atom_site_disorder_group
_atom_site_attached_hydrogens
Co1 Co 0.72502(4) 0.09255(3) 0.597558(10) 0.0199 1.0000 Uani . . . . . . 
Co2 Co 0.92050(3) -0.10674(3) 0.646777(9) 0.0181 1.0000 Uani . . . . . . 
Ti1 Ti 0.66002(5) 0.23492(4) 0.574360(13) 0.0193 1.0000 Uani . . . . . . 
Ti2 Ti 1.07223(4) -0.17560(3) 0.684148(12) 0.0153 1.0000 Uani . . . . . . 
P1 P 0.80782(7) 0.11606(6) 0.557422(19) 0.0228 1.0000 Uani . . . . . . 
P2 P 0.56070(7) 0.07659(6) 0.58111(2) 0.0229 1.0000 Uani . . . . . . 
P3 P 0.62967(8) 0.39714(6) 0.57341(3) 0.0361 1.0000 Uani . . . . . . 
P4 P 0.96877(7) -0.21535(6) 0.624315(19) 0.0223 1.0000 Uani . . . . . . 
P5 P 0.84753(7) -0.15342(5) 0.685610(19) 0.0187 1.0000 Uani . . . . . . 
P6 P 1.25379(7) -0.17483(6) 0.722648(19) 0.0203 1.0000 Uani . . . . . . 
N1 N 0.7601(2) 0.20182(17) 0.54683(6) 0.0220 1.0000 Uani . . . . . . 
N2 N 0.5395(2) 0.16135(17) 0.56412(6) 0.0215 1.0000 Uani . . . . . . 
N3 N 0.7044(2) 0.19753(16) 0.61062(6) 0.0201 1.0000 Uani . . . . . . 
N4 N 0.7295(2) 0.34602(18) 0.57807(7) 0.0304 1.0000 Uani . . . . . . 
N5 N 0.5529(2) 0.32657(19) 0.56997(7) 0.0334 1.0000 Uani . . . . . . 
N6 N 1.0499(2) -0.08150(16) 0.66788(6) 0.0193 1.0000 Uani . . . . . . 
N7 N 0.9426(2) -0.20703(16) 0.70114(6) 0.0194 1.0000 Uani . . . . . . 
N8 N 1.0604(2) -0.24770(16) 0.64891(6) 0.0180 1.0000 Uani . . . . . . 
N9 N 1.2291(2) -0.20312(16) 0.68932(6) 0.0197 1.0000 Uani . . . . . . 
N10 N 1.1407(2) -0.14924(16) 0.72725(5) 0.0184 1.0000 Uani . . . . . . 
N11 N 0.7855(2) 0.00249(17) 0.61385(6) 0.0238(7) 1.0000 Uiso . . . . . . 
N12 N 0.8284(2) -0.04327(16) 0.62397(6) 0.0190(6) 1.0000 Uiso . . . . . . 
C1 C 0.9447(3) 0.1275(2) 0.56646(8) 0.0284 1.0000 Uani . . . . . . 
C2 C 0.9950(3) 0.0510(3) 0.57505(10) 0.0438 1.0000 Uani . . . . . . 
C3 C 0.9668(3) 0.1855(3) 0.59109(8) 0.0401 1.0000 Uani . . . . . . 
C4 C 0.8003(3) 0.0533(2) 0.52448(8) 0.0362 1.0000 Uani . . . . . . 
C7 C 0.5144(4) -0.0009(3) 0.55571(9) 0.0451 1.0000 Uani . . . . . . 
C10 C 0.4776(3) 0.0650(2) 0.61145(8) 0.0308 1.0000 Uani . . . . . . 
C11 C 0.5236(4) 0.0067(3) 0.63327(11) 0.0721 1.0000 Uani . . . . . . 
C12 C 0.4595(3) 0.1398(3) 0.62623(9) 0.0438 1.0000 Uani . . . . . . 
C13 C 0.7922(3) 0.2382(2) 0.52152(7) 0.0253 1.0000 Uani . . . . . . 
C14 C 0.7326(3) 0.2349(2) 0.49507(8) 0.0312 1.0000 Uani . . . . . . 
C15 C 0.7613(3) 0.2686(2) 0.46986(8) 0.0353 1.0000 Uani . . . . . . 
C16 C 0.8550(3) 0.3039(3) 0.47116(8) 0.0394 1.0000 Uani . . . . . . 
C17 C 0.9168(3) 0.3069(2) 0.49664(8) 0.0328 1.0000 Uani . . . . . . 
C18 C 0.8842(3) 0.2739(2) 0.52170(8) 0.0272 1.0000 Uani . . . . . . 
C19 C 0.6926(4) 0.2652(3) 0.44195(9) 0.0559 1.0000 Uani . . . . . . 
C20 C 1.0205(4) 0.3412(3) 0.49769(10) 0.0555 1.0000 Uani . . . . . . 
C21 C 0.4561(3) 0.1749(2) 0.54326(7) 0.0229 1.0000 Uani . . . . . . 
C22 C 0.3579(3) 0.1573(2) 0.54803(8) 0.0298 1.0000 Uani . . . . . . 
C23 C 0.2784(3) 0.1733(2) 0.52696(9) 0.0354 1.0000 Uani . . . . . . 
C24 C 0.2985(3) 0.2065(2) 0.50082(9) 0.0362 1.0000 Uani . . . . . . 
C25 C 0.3959(3) 0.2252(2) 0.49556(8) 0.0307 1.0000 Uani . . . . . . 
C26 C 0.4729(3) 0.2088(2) 0.51680(7) 0.0296 1.0000 Uani . . . . . . 
C27 C 0.1722(3) 0.1563(3) 0.53329(11) 0.0563 1.0000 Uani . . . . . . 
C28 C 0.4172(4) 0.2653(3) 0.46767(9) 0.0506 1.0000 Uani . . . . . . 
C29 C 0.7212(3) 0.2159(2) 0.64009(7) 0.0212 1.0000 Uani . . . . . . 
C30 C 0.6687(3) 0.2757(2) 0.65203(8) 0.0270 1.0000 Uani . . . . . . 
C31 C 0.6887(3) 0.2976(2) 0.68089(8) 0.0362 1.0000 Uani . . . . . . 
C32 C 0.7589(3) 0.2588(3) 0.69886(8) 0.0383 1.0000 Uani . . . . . . 
C33 C 0.8102(3) 0.1989(2) 0.68781(8) 0.0357 1.0000 Uani . . . . . . 
C34 C 0.7919(3) 0.1772(2) 0.65893(7) 0.0281 1.0000 Uani . . . . . . 
C35 C 0.8279(3) 0.3735(2) 0.58652(9) 0.0290 1.0000 Uani . . . . . . 
C36 C 0.8809(3) 0.4164(2) 0.56748(9) 0.0366 1.0000 Uani . . . . . . 
C37 C 0.9757(3) 0.4444(2) 0.57623(10) 0.0414 1.0000 Uani . . . . . . 
C38 C 1.0189(3) 0.4272(2) 0.60369(10) 0.0422 1.0000 Uani . . . . . . 
C39 C 0.9695(3) 0.3824(2) 0.62280(9) 0.0356 1.0000 Uani . . . . . . 
C40 C 0.8741(3) 0.3566(2) 0.61396(9) 0.0323 1.0000 Uani . . . . . . 
C41 C 1.0266(4) 0.4955(3) 0.55519(12) 0.0696 1.0000 Uani . . . . . . 
C42 C 1.0169(4) 0.3631(3) 0.65203(11) 0.0584 1.0000 Uani . . . . . . 
C43 C 0.4463(3) 0.3360(2) 0.56939(9) 0.0347 1.0000 Uani . . . . . . 
C44 C 0.3993(3) 0.3195(2) 0.59366(10) 0.0387 1.0000 Uani . . . . . . 
C45 C 0.2944(3) 0.3248(3) 0.59367(11) 0.0496 1.0000 Uani . . . . . . 
C46 C 0.2388(4) 0.3496(3) 0.56900(11) 0.0538 1.0000 Uani . . . . . . 
C47 C 0.2849(4) 0.3686(3) 0.54446(11) 0.0540 1.0000 Uani . . . . . . 
C48 C 0.3879(3) 0.3614(3) 0.54468(10) 0.0431 1.0000 Uani . . . . . . 
C49 C 0.6166(4) 0.4590(3) 0.54114(11) 0.0539 1.0000 Uani . . . . . . 
C50 C 0.6346(5) 0.4125(3) 0.51333(11) 0.0678 1.0000 Uani . . . . . . 
C51 C 0.6779(5) 0.5336(3) 0.54277(16) 0.0924 1.0000 Uani . . . . . . 
C52 C 0.6052(4) 0.4558(3) 0.60530(12) 0.0590 1.0000 Uani . . . . . . 
C53 C 0.5133(4) 0.5097(3) 0.59834(13) 0.0799 1.0000 Uani . . . . . . 
C54 C 0.6888(4) 0.4973(4) 0.62062(14) 0.0872 1.0000 Uani . . . . . . 
C55 C 0.8769(3) -0.2946(2) 0.61729(8) 0.0308 1.0000 Uani . . . . . . 
C56 C 0.7727(3) -0.2651(3) 0.60546(9) 0.0424 1.0000 Uani . . . . . . 
C57 C 0.9095(3) -0.3611(3) 0.59885(10) 0.0491 1.0000 Uani . . . . . . 
C58 C 1.0203(3) -0.2016(2) 0.58830(8) 0.0333 1.0000 Uani . . . . . . 
C59 C 0.9405(4) -0.1732(3) 0.56522(8) 0.0489 1.0000 Uani . . . . . . 
C60 C 1.1089(3) -0.1462(3) 0.59182(8) 0.0378 1.0000 Uani . . . . . . 
C61 C 0.7299(3) -0.2098(2) 0.68093(8) 0.0256 1.0000 Uani . . . . . . 
C62 C 0.6494(3) -0.1648(2) 0.66198(9) 0.0348 1.0000 Uani . . . . . . 
C63 C 0.6850(3) -0.2403(2) 0.70796(9) 0.0367 1.0000 Uani . . . . . . 
C64 C 0.8299(3) -0.0751(2) 0.71199(7) 0.0225 1.0000 Uani . . . . . . 
C65 C 0.8130(3) -0.0978(2) 0.74332(8) 0.0335 1.0000 Uani . . . . . . 
C66 C 0.7546(3) -0.0139(2) 0.70044(8) 0.0334 1.0000 Uani . . . . . . 
C67 C 1.0793(3) -0.0069(2) 0.66186(7) 0.0191 1.0000 Uani . . . . . . 
C68 C 1.0280(3) 0.0570(2) 0.67090(7) 0.0243 1.0000 Uani . . . . . . 
C69 C 1.0593(3) 0.1303(2) 0.66585(8) 0.0315 1.0000 Uani . . . . . . 
C70 C 1.1433(3) 0.1426(2) 0.65132(9) 0.0379 1.0000 Uani . . . . . . 
C71 C 1.1943(3) 0.0811(2) 0.64126(9) 0.0374 1.0000 Uani . . . . . . 
C72 C 1.1630(3) 0.0075(2) 0.64635(8) 0.0286 1.0000 Uani . . . . . . 
C73 C 0.9308(2) -0.2757(2) 0.71740(7) 0.0209 1.0000 Uani . . . . . . 
C74 C 0.9585(3) -0.2791(2) 0.74722(7) 0.0255 1.0000 Uani . . . . . . 
C75 C 0.9501(3) -0.3475(3) 0.76249(8) 0.0344 1.0000 Uani . . . . . . 
C76 C 0.9144(3) -0.4121(2) 0.74767(9) 0.0340 1.0000 Uani . . . . . . 
C77 C 0.8880(3) -0.4109(2) 0.71806(9) 0.0328 1.0000 Uani . . . . . . 
C78 C 0.8961(3) -0.3424(2) 0.70328(8) 0.0264 1.0000 Uani . . . . . . 
C79 C 0.9801(4) -0.3501(3) 0.79487(8) 0.0469 1.0000 Uani . . . . . . 
C80 C 0.8512(4) -0.4822(3) 0.70171(11) 0.0547 1.0000 Uani . . . . . . 
C81 C 1.1084(3) -0.3203(2) 0.64814(7) 0.0219 1.0000 Uani . . . . . . 
C82 C 1.1590(3) -0.3455(2) 0.62471(8) 0.0250 1.0000 Uani . . . . . . 
C83 C 1.2068(3) -0.4161(2) 0.62521(8) 0.0291 1.0000 Uani . . . . . . 
C84 C 1.2067(3) -0.4611(2) 0.64976(9) 0.0312 1.0000 Uani . . . . . . 
C85 C 1.1592(3) -0.4377(2) 0.67386(8) 0.0289 1.0000 Uani . . . . . . 
C86 C 1.1098(3) -0.3679(2) 0.67252(8) 0.0239 1.0000 Uani . . . . . . 
C87 C 1.2620(3) -0.4411(3) 0.59973(10) 0.0436 1.0000 Uani . . . . . . 
C88 C 1.1623(3) -0.4868(2) 0.70099(9) 0.0395 1.0000 Uani . . . . . . 
C89 C 1.3019(2) -0.2312(2) 0.67120(7) 0.0209 1.0000 Uani . . . . . . 
C90 C 1.3260(3) -0.1882(2) 0.64766(7) 0.0249 1.0000 Uani . . . . . . 
C91 C 1.3936(3) -0.2156(2) 0.62896(8) 0.0320 1.0000 Uani . . . . . . 
C92 C 1.4373(3) -0.2857(2) 0.63372(8) 0.0318 1.0000 Uani . . . . . . 
C93 C 1.4154(3) -0.3286(2) 0.65713(9) 0.0328 1.0000 Uani . . . . . . 
C94 C 1.3482(3) -0.3017(2) 0.67582(8) 0.0248 1.0000 Uani . . . . . . 
C95 C 1.1102(3) -0.1045(2) 0.75038(7) 0.0221 1.0000 Uani . . . . . . 
C96 C 1.1135(3) -0.1321(2) 0.77885(7) 0.0271 1.0000 Uani . . . . . . 
C97 C 1.0775(3) -0.0890(3) 0.80109(8) 0.0336 1.0000 Uani . . . . . . 
C98 C 1.0376(3) -0.0176(3) 0.79445(8) 0.0352 1.0000 Uani . . . . . . 
C99 C 1.0332(3) 0.0128(2) 0.76636(8) 0.0300 1.0000 Uani . . . . . . 
C100 C 1.0704(3) -0.0317(2) 0.74465(8) 0.0242 1.0000 Uani . . . . . . 
C101 C 1.0821(4) -0.1221(3) 0.83160(8) 0.0516 1.0000 Uani . . . . . . 
C102 C 0.9862(3) 0.0886(2) 0.75919(9) 0.0426 1.0000 Uani . . . . . . 
C103 C 1.3086(3) -0.2506(2) 0.74641(8) 0.0281 1.0000 Uani . . . . . . 
C104 C 1.2356(3) -0.3169(2) 0.74833(9) 0.0401 1.0000 Uani . . . . . . 
C105 C 1.3530(3) -0.2248(3) 0.77699(8) 0.0417 1.0000 Uani . . . . . . 
C106 C 1.3435(3) -0.0964(2) 0.72772(8) 0.0253 1.0000 Uani . . . . . . 
C107 C 1.4495(3) -0.1203(3) 0.72166(9) 0.0374 1.0000 Uani . . . . . . 
C108 C 1.3089(3) -0.0265(2) 0.70964(9) 0.0340 1.0000 Uani . . . . . . 
C501 C 0.7977(5) -0.0275(4) 0.53062(14) 0.034(2) 0.592(8) Uiso . . P 1 3 . 
C502 C 0.8927(10) 0.0660(7) 0.5056(3) 0.027(3) 0.408(8) Uiso . . P 1 4 . 
C601 C 0.8692(8) 0.0719(6) 0.5004(2) 0.045(3) 0.592(8) Uiso . . P 1 3 . 
C602 C 0.7056(8) 0.0481(6) 0.5093(2) 0.042(3) 0.408(8) Uiso . . P 1 4 . 
C801 C 0.5390(8) 0.0069(6) 0.5254(2) 0.054(3) 0.487(8) Uiso . . P 2 1 . 
C802 C 0.4126(8) -0.0334(6) 0.5551(2) 0.067(3) 0.513(8) Uiso . . P 2 2 . 
C901 C 0.5290(9) -0.0775(6) 0.5691(2) 0.054(3) 0.487(8) Uiso . . P 2 1 . 
C902 C 0.5924(7) -0.0725(5) 0.56125(19) 0.044(3) 0.513(8) Uiso . . P 2 2 . 
H11 H 0.9730 0.1467 0.5490 0.0343 1.0000 Uiso R . . . . . 
H21 H 0.9879 0.0160 0.5586 0.0658 1.0000 Uiso R . . . . . 
H22 H 1.0658 0.0596 0.5805 0.0658 1.0000 Uiso R . . . . . 
H23 H 0.9636 0.0293 0.5912 0.0662 1.0000 Uiso R . . . . . 
H31 H 0.9443 0.1644 0.6088 0.0599 1.0000 Uiso R . . . . . 
H32 H 0.9315 0.2329 0.5863 0.0600 1.0000 Uiso R . . . . . 
H33 H 1.0377 0.1958 0.5939 0.0597 1.0000 Uiso R . . . . . 
H41 H 0.7872 0.1033 0.5161 0.0447 0.408(8) Uiso R . P 1 4 . 
H42 H 0.8843 0.0505 0.5242 0.0536 0.592(8) Uiso R . P 1 3 . 
H71 H 0.4436 0.0053 0.5543 0.0536 0.487(8) Uiso R . P 2 1 . 
H72 H 0.5211 0.0174 0.5366 0.0536 0.513(8) Uiso R . P 2 2 . 
H101 H 0.4128 0.0443 0.6030 0.0371 1.0000 Uiso R . . . . . 
H111 H 0.4774 -0.0039 0.6476 0.1076 1.0000 Uiso R . . . . . 
H112 H 0.5384 -0.0391 0.6230 0.1080 1.0000 Uiso R . . . . . 
H113 H 0.5853 0.0279 0.6425 0.1078 1.0000 Uiso R . . . . . 
H121 H 0.5234 0.1634 0.6325 0.0648 1.0000 Uiso R . . . . . 
H122 H 0.4211 0.1732 0.6126 0.0656 1.0000 Uiso R . . . . . 
H123 H 0.4214 0.1312 0.6431 0.0647 1.0000 Uiso R . . . . . 
H141 H 0.6710 0.2093 0.4943 0.0377 1.0000 Uiso R . . . . . 
H161 H 0.8754 0.3263 0.4540 0.0467 1.0000 Uiso R . . . . . 
H181 H 0.9263 0.2757 0.5392 0.0329 1.0000 Uiso R . . . . . 
H191 H 0.6463 0.3080 0.4416 0.0842 1.0000 Uiso R . . . . . 
H192 H 0.6538 0.2180 0.4412 0.0843 1.0000 Uiso R . . . . . 
H193 H 0.7308 0.2675 0.4249 0.0839 1.0000 Uiso R . . . . . 
H201 H 1.0526 0.3246 0.4809 0.0831 1.0000 Uiso R . . . . . 
H202 H 1.0609 0.3275 0.5154 0.0836 1.0000 Uiso R . . . . . 
H203 H 1.0142 0.3954 0.4971 0.0834 1.0000 Uiso R . . . . . 
H221 H 0.3446 0.1355 0.5657 0.0360 1.0000 Uiso R . . . . . 
H241 H 0.2460 0.2175 0.4868 0.0430 1.0000 Uiso R . . . . . 
H261 H 0.5385 0.2206 0.5133 0.0362 1.0000 Uiso R . . . . . 
H271 H 0.1275 0.1657 0.5161 0.0848 1.0000 Uiso R . . . . . 
H272 H 0.1657 0.1038 0.5389 0.0851 1.0000 Uiso R . . . . . 
H273 H 0.1531 0.1880 0.5489 0.0853 1.0000 Uiso R . . . . . 
H281 H 0.4881 0.2643 0.4654 0.0764 1.0000 Uiso R . . . . . 
H282 H 0.3831 0.2393 0.4515 0.0762 1.0000 Uiso R . . . . . 
H283 H 0.3936 0.3167 0.4677 0.0768 1.0000 Uiso R . . . . . 
H301 H 0.6190 0.3023 0.6401 0.0317 1.0000 Uiso R . . . . . 
H311 H 0.6537 0.3390 0.6881 0.0438 1.0000 Uiso R . . . . . 
H321 H 0.7716 0.2724 0.7183 0.0464 1.0000 Uiso R . . . . . 
H331 H 0.8597 0.1735 0.6999 0.0428 1.0000 Uiso R . . . . . 
H341 H 0.8271 0.1369 0.6516 0.0325 1.0000 Uiso R . . . . . 
H361 H 0.8530 0.4266 0.5488 0.0437 1.0000 Uiso R . . . . . 
H381 H 1.0827 0.4456 0.6103 0.0504 1.0000 Uiso R . . . . . 
H401 H 0.8403 0.3274 0.6265 0.0386 1.0000 Uiso R . . . . . 
H411 H 1.0343 0.5476 0.5636 0.1032 1.0000 Uiso R . . . . . 
H412 H 1.0930 0.4752 0.5522 0.1030 1.0000 Uiso R . . . . . 
H413 H 0.9875 0.4986 0.5361 0.1033 1.0000 Uiso R . . . . . 
H421 H 1.0114 0.3084 0.6553 0.0877 1.0000 Uiso R . . . . . 
H422 H 1.0879 0.3767 0.6534 0.0879 1.0000 Uiso R . . . . . 
H423 H 0.9848 0.3909 0.6670 0.0879 1.0000 Uiso R . . . . . 
H441 H 0.4357 0.3031 0.6109 0.0455 1.0000 Uiso R . . . . . 
H451 H 0.2586 0.3098 0.6108 0.0570 1.0000 Uiso R . . . . . 
H461 H 0.1692 0.3525 0.5689 0.0650 1.0000 Uiso R . . . . . 
H471 H 0.2471 0.3867 0.5266 0.0640 1.0000 Uiso R . . . . . 
H481 H 0.4198 0.3742 0.5281 0.0514 1.0000 Uiso R . . . . . 
H491 H 0.5447 0.4774 0.5394 0.0645 1.0000 Uiso R . . . . . 
H501 H 0.7047 0.3974 0.5136 0.1023 1.0000 Uiso R . . . . . 
H502 H 0.6185 0.4417 0.4955 0.1021 1.0000 Uiso R . . . . . 
H503 H 0.5944 0.3661 0.5123 0.1018 1.0000 Uiso R . . . . . 
H511 H 0.7484 0.5215 0.5472 0.1371 1.0000 Uiso R . . . . . 
H512 H 0.6561 0.5671 0.5580 0.1371 1.0000 Uiso R . . . . . 
H513 H 0.6684 0.5587 0.5235 0.1368 1.0000 Uiso R . . . . . 
H521 H 0.5859 0.4199 0.6206 0.0707 1.0000 Uiso R . . . . . 
H531 H 0.4947 0.5314 0.6166 0.1188 1.0000 Uiso R . . . . . 
H532 H 0.4569 0.4808 0.5884 0.1189 1.0000 Uiso R . . . . . 
H533 H 0.5337 0.5494 0.5848 0.1186 1.0000 Uiso R . . . . . 
H541 H 0.7392 0.4608 0.6278 0.1300 1.0000 Uiso R . . . . . 
H542 H 0.7128 0.5311 0.6062 0.1302 1.0000 Uiso R . . . . . 
H543 H 0.6652 0.5257 0.6365 0.1297 1.0000 Uiso R . . . . . 
H551 H 0.8686 -0.3150 0.6364 0.0359 1.0000 Uiso R . . . . . 
H561 H 0.7224 -0.3028 0.6088 0.0639 1.0000 Uiso R . . . . . 
H562 H 0.7708 -0.2546 0.5846 0.0637 1.0000 Uiso R . . . . . 
H563 H 0.7554 -0.2187 0.6153 0.0640 1.0000 Uiso R . . . . . 
H571 H 0.9733 -0.3810 0.6077 0.0737 1.0000 Uiso R . . . . . 
H572 H 0.9145 -0.3450 0.5790 0.0741 1.0000 Uiso R . . . . . 
H573 H 0.8596 -0.3994 0.5991 0.0741 1.0000 Uiso R . . . . . 
H581 H 1.0453 -0.2508 0.5822 0.0396 1.0000 Uiso R . . . . . 
H591 H 0.8928 -0.2138 0.5607 0.0722 1.0000 Uiso R . . . . . 
H592 H 0.9719 -0.1581 0.5482 0.0726 1.0000 Uiso R . . . . . 
H593 H 0.9063 -0.1302 0.5723 0.0724 1.0000 Uiso R . . . . . 
H601 H 1.1606 -0.1642 0.6063 0.0553 1.0000 Uiso R . . . . . 
H602 H 1.1372 -0.1405 0.5732 0.0559 1.0000 Uiso R . . . . . 
H603 H 1.0859 -0.0968 0.5977 0.0557 1.0000 Uiso R . . . . . 
H611 H 0.7452 -0.2545 0.6693 0.0307 1.0000 Uiso R . . . . . 
H621 H 0.6232 -0.1252 0.6734 0.0517 1.0000 Uiso R . . . . . 
H622 H 0.6773 -0.1403 0.6459 0.0513 1.0000 Uiso R . . . . . 
H623 H 0.5953 -0.1977 0.6545 0.0521 1.0000 Uiso R . . . . . 
H631 H 0.6573 -0.1997 0.7188 0.0543 1.0000 Uiso R . . . . . 
H632 H 0.6318 -0.2745 0.7015 0.0545 1.0000 Uiso R . . . . . 
H633 H 0.7338 -0.2688 0.7202 0.0548 1.0000 Uiso R . . . . . 
H641 H 0.8950 -0.0500 0.7138 0.0270 1.0000 Uiso R . . . . . 
H651 H 0.7453 -0.1135 0.7445 0.0498 1.0000 Uiso R . . . . . 
H652 H 0.8284 -0.0549 0.7560 0.0496 1.0000 Uiso R . . . . . 
H653 H 0.8575 -0.1393 0.7495 0.0502 1.0000 Uiso R . . . . . 
H661 H 0.7654 -0.0003 0.6808 0.0501 1.0000 Uiso R . . . . . 
H662 H 0.7617 0.0305 0.7126 0.0502 1.0000 Uiso R . . . . . 
H663 H 0.6877 -0.0334 0.7006 0.0499 1.0000 Uiso R . . . . . 
H681 H 0.9708 0.0495 0.6805 0.0284 1.0000 Uiso R . . . . . 
H691 H 1.0234 0.1715 0.6722 0.0374 1.0000 Uiso R . . . . . 
H701 H 1.1653 0.1915 0.6481 0.0453 1.0000 Uiso R . . . . . 
H711 H 1.2511 0.0886 0.6310 0.0448 1.0000 Uiso R . . . . . 
H721 H 1.1974 -0.0333 0.6390 0.0341 1.0000 Uiso R . . . . . 
H741 H 0.9841 -0.2353 0.7572 0.0305 1.0000 Uiso R . . . . . 
H761 H 0.9085 -0.4573 0.7578 0.0407 1.0000 Uiso R . . . . . 
H781 H 0.8776 -0.3406 0.6832 0.0319 1.0000 Uiso R . . . . . 
H791 H 1.0223 -0.3928 0.7997 0.0709 1.0000 Uiso R . . . . . 
H792 H 1.0137 -0.3050 0.8022 0.0701 1.0000 Uiso R . . . . . 
H793 H 0.9225 -0.3567 0.8048 0.0709 1.0000 Uiso R . . . . . 
H801 H 0.8730 -0.4827 0.6825 0.0824 1.0000 Uiso R . . . . . 
H802 H 0.7800 -0.4849 0.7003 0.0822 1.0000 Uiso R . . . . . 
H803 H 0.8781 -0.5260 0.7124 0.0819 1.0000 Uiso R . . . . . 
H821 H 1.1607 -0.3147 0.6086 0.0290 1.0000 Uiso R . . . . . 
H841 H 1.2395 -0.5082 0.6503 0.0365 1.0000 Uiso R . . . . . 
H861 H 1.0757 -0.3521 0.6882 0.0291 1.0000 Uiso R . . . . . 
H871 H 1.2236 -0.4287 0.5817 0.0653 1.0000 Uiso R . . . . . 
H872 H 1.2742 -0.4955 0.6006 0.0650 1.0000 Uiso R . . . . . 
H873 H 1.3254 -0.4152 0.6001 0.0651 1.0000 Uiso R . . . . . 
H881 H 1.2265 -0.4827 0.7123 0.0592 1.0000 Uiso R . . . . . 
H882 H 1.1107 -0.4713 0.7126 0.0592 1.0000 Uiso R . . . . . 
H883 H 1.1506 -0.5396 0.6951 0.0595 1.0000 Uiso R . . . . . 
H901 H 1.2953 -0.1408 0.6443 0.0295 1.0000 Uiso R . . . . . 
H911 H 1.4080 -0.1860 0.6134 0.0383 1.0000 Uiso R . . . . . 
H921 H 1.4815 -0.3046 0.6212 0.0380 1.0000 Uiso R . . . . . 
H931 H 1.4469 -0.3768 0.6602 0.0403 1.0000 Uiso R . . . . . 
H941 H 1.3331 -0.3324 0.6911 0.0303 1.0000 Uiso R . . . . . 
H961 H 1.1398 -0.1807 0.7830 0.0326 1.0000 Uiso R . . . . . 
H981 H 1.0133 0.0103 0.8094 0.0422 1.0000 Uiso R . . . . . 
H1001 H 1.0682 -0.0115 0.7258 0.0285 1.0000 Uiso R . . . . . 
H1011 H 1.0551 -0.0868 0.8449 0.0778 1.0000 Uiso R . . . . . 
H1012 H 1.0446 -0.1692 0.8313 0.0776 1.0000 Uiso R . . . . . 
H1013 H 1.1517 -0.1330 0.8381 0.0778 1.0000 Uiso R . . . . . 
H1021 H 1.0141 0.1104 0.7424 0.0634 1.0000 Uiso R . . . . . 
H1022 H 0.9978 0.1225 0.7758 0.0630 1.0000 Uiso R . . . . . 
H1023 H 0.9152 0.0817 0.7546 0.0631 1.0000 Uiso R . . . . . 
H1031 H 1.3658 -0.2693 0.7367 0.0342 1.0000 Uiso R . . . . . 
H1041 H 1.2703 -0.3584 0.7585 0.0598 1.0000 Uiso R . . . . . 
H1042 H 1.1808 -0.3006 0.7589 0.0598 1.0000 Uiso R . . . . . 
H1043 H 1.2098 -0.3332 0.7292 0.0601 1.0000 Uiso R . . . . . 
H1051 H 1.3007 -0.1997 0.7866 0.0615 1.0000 Uiso R . . . . . 
H1052 H 1.3766 -0.2688 0.7876 0.0616 1.0000 Uiso R . . . . . 
H1053 H 1.4078 -0.1895 0.7754 0.0616 1.0000 Uiso R . . . . . 
H1061 H 1.3461 -0.0815 0.7481 0.0295 1.0000 Uiso R . . . . . 
H1071 H 1.4952 -0.0794 0.7259 0.0560 1.0000 Uiso R . . . . . 
H1072 H 1.4727 -0.1636 0.7335 0.0560 1.0000 Uiso R . . . . . 
H1073 H 1.4507 -0.1338 0.7014 0.0558 1.0000 Uiso R . . . . . 
H1081 H 1.3536 0.0149 0.7152 0.0507 1.0000 Uiso R . . . . . 
H1082 H 1.2409 -0.0130 0.7125 0.0510 1.0000 Uiso R . . . . . 
H1083 H 1.3119 -0.0380 0.6894 0.0508 1.0000 Uiso R . . . . . 
H5011 H 0.7650 -0.0538 0.5142 0.0521 0.592(8) Uiso R . P 1 3 . 
H5012 H 0.8643 -0.0464 0.5348 0.0518 0.592(8) Uiso R . P 1 3 . 
H5013 H 0.7605 -0.0375 0.5468 0.0517 0.592(8) Uiso R . P 1 3 . 
H5021 H 0.8834 0.0310 0.4893 0.0469 0.408(8) Uiso R . P 1 4 . 
H5022 H 0.9543 0.0540 0.5175 0.0466 0.408(8) Uiso R . P 1 4 . 
H5023 H 0.8945 0.1181 0.4986 0.0464 0.408(8) Uiso R . P 1 4 . 
H6011 H 0.8418 0.0383 0.4853 0.0619 0.592(8) Uiso R . P 1 3 . 
H6012 H 0.9411 0.0651 0.5009 0.0626 0.592(8) Uiso R . P 1 3 . 
H6013 H 0.8592 0.1255 0.4967 0.0616 0.592(8) Uiso R . P 1 3 . 
H6021 H 0.6922 -0.0037 0.5041 0.0640 0.408(8) Uiso R . P 1 4 . 
H6022 H 0.6553 0.0656 0.5210 0.0640 0.408(8) Uiso R . P 1 4 . 
H6023 H 0.7034 0.0790 0.4923 0.0639 0.408(8) Uiso R . P 1 4 . 
H8011 H 0.5021 -0.0318 0.5138 0.0892 0.487(8) Uiso R . P 2 1 . 
H8012 H 0.6098 0.0001 0.5244 0.0890 0.487(8) Uiso R . P 2 1 . 
H8013 H 0.5197 0.0568 0.5180 0.0891 0.487(8) Uiso R . P 2 1 . 
H8021 H 0.4043 -0.0694 0.5393 0.0910 0.513(8) Uiso R . P 2 2 . 
H8022 H 0.4048 -0.0580 0.5735 0.0909 0.513(8) Uiso R . P 2 2 . 
H8023 H 0.3640 0.0062 0.5517 0.0909 0.513(8) Uiso R . P 2 2 . 
H9011 H 0.5988 -0.0866 0.5744 0.0935 0.487(8) Uiso R . P 2 1 . 
H9012 H 0.4931 -0.0812 0.5861 0.0940 0.487(8) Uiso R . P 2 1 . 
H9013 H 0.5046 -0.1167 0.5555 0.0942 0.487(8) Uiso R . P 2 1 . 
H9021 H 0.6599 -0.0541 0.5609 0.0570 0.513(8) Uiso R . P 2 2 . 
H9022 H 0.5793 -0.1087 0.5456 0.0567 0.513(8) Uiso R . P 2 2 . 
H9023 H 0.5853 -0.0969 0.5794 0.0565 0.513(8) Uiso R . P 2 2 . 
loop_
_atom_site_aniso_label
_atom_site_aniso_U_11
_atom_site_aniso_U_22
_atom_site_aniso_U_33
_atom_site_aniso_U_23
_atom_site_aniso_U_13
_atom_site_aniso_U_12
Co1 0.0220(3) 0.0210(3) 0.0165(2) 0.0023(2) 0.00126(19) 0.0049(2) 
Co2 0.0179(2) 0.0204(3) 0.0157(2) 0.00209(19) 0.00048(18) 0.0033(2) 
Ti1 0.0195(3) 0.0220(4) 0.0164(3) 0.0004(3) 0.0012(2) 0.0059(3) 
Ti2 0.0151(3) 0.0173(3) 0.0135(3) 0.0011(2) 0.0015(2) 0.0018(3) 
P1 0.0262(5) 0.0253(5) 0.0173(4) 0.0015(4) 0.0048(4) 0.0087(4) 
P2 0.0235(5) 0.0233(5) 0.0215(5) -0.0013(4) -0.0003(4) 0.0017(4) 
P3 0.0310(6) 0.0250(6) 0.0508(7) -0.0038(5) -0.0040(5) 0.0096(5) 
P4 0.0235(5) 0.0249(5) 0.0178(5) -0.0028(4) -0.0026(4) 0.0043(4) 
P5 0.0147(4) 0.0219(5) 0.0197(5) 0.0024(4) 0.0022(4) 0.0006(4) 
P6 0.0169(5) 0.0256(5) 0.0178(4) -0.0011(4) -0.0015(4) 0.0022(4) 
N1 0.0244(16) 0.0240(17) 0.0179(15) 0.0043(12) 0.0034(12) 0.0077(14) 
N2 0.0227(16) 0.0226(17) 0.0185(15) -0.0001(12) -0.0014(12) 0.0042(13) 
N3 0.0205(16) 0.0231(17) 0.0165(14) -0.0032(12) 0.0012(12) 0.0026(13) 
N4 0.0218(17) 0.0255(18) 0.043(2) 0.0010(15) 0.0001(14) 0.0068(14) 
N5 0.0255(18) 0.032(2) 0.0409(19) -0.0054(16) -0.0045(15) 0.0109(16) 
N6 0.0199(15) 0.0207(16) 0.0175(14) -0.0009(12) 0.0030(12) 0.0028(13) 
N7 0.0168(15) 0.0225(17) 0.0185(15) 0.0023(12) -0.0006(12) 0.0005(13) 
N8 0.0199(15) 0.0195(16) 0.0142(14) 0.0004(12) -0.0009(11) 0.0041(13) 
N9 0.0181(15) 0.0215(16) 0.0195(15) -0.0015(12) 0.0012(12) 0.0025(13) 
N10 0.0175(15) 0.0246(17) 0.0128(14) 0.0009(12) 0.0009(11) 0.0032(13) 
C1 0.029(2) 0.030(2) 0.027(2) 0.0069(17) 0.0078(16) 0.0092(18) 
C2 0.030(2) 0.049(3) 0.053(3) 0.023(2) 0.005(2) 0.013(2) 
C3 0.029(2) 0.058(3) 0.033(2) 0.003(2) 0.0015(18) 0.003(2) 
C4 0.048(3) 0.032(2) 0.030(2) -0.0051(18) 0.0122(19) 0.006(2) 
C7 0.061(3) 0.036(3) 0.037(2) -0.006(2) -0.002(2) -0.013(2) 
C10 0.027(2) 0.035(2) 0.032(2) 0.0061(18) 0.0070(17) -0.0013(18) 
C11 0.086(4) 0.084(4) 0.051(3) 0.041(3) 0.035(3) 0.045(3) 
C12 0.040(3) 0.053(3) 0.041(3) -0.007(2) 0.018(2) -0.008(2) 
C13 0.029(2) 0.030(2) 0.0173(18) 0.0036(16) 0.0064(15) 0.0072(18) 
C14 0.032(2) 0.034(2) 0.028(2) 0.0019(18) 0.0046(17) 0.0067(19) 
C15 0.042(3) 0.043(3) 0.022(2) 0.0050(18) 0.0056(18) 0.008(2) 
C16 0.048(3) 0.046(3) 0.026(2) 0.0058(19) 0.0145(19) -0.002(2) 
C17 0.038(2) 0.036(2) 0.026(2) 0.0001(17) 0.0102(18) -0.0010(19) 
C18 0.030(2) 0.031(2) 0.0208(19) 0.0039(16) 0.0049(16) 0.0022(18) 
C19 0.054(3) 0.081(4) 0.033(2) 0.013(2) 0.003(2) -0.006(3) 
C20 0.052(3) 0.071(4) 0.045(3) 0.007(3) 0.014(2) -0.018(3) 
C21 0.0225(19) 0.024(2) 0.0208(18) -0.0049(15) -0.0033(15) 0.0079(16) 
C22 0.028(2) 0.033(2) 0.028(2) 0.0002(17) 0.0009(16) -0.0018(18) 
C23 0.022(2) 0.041(3) 0.042(2) -0.010(2) -0.0030(18) 0.0014(19) 
C24 0.032(2) 0.040(3) 0.032(2) -0.0065(19) -0.0151(18) 0.011(2) 
C25 0.032(2) 0.036(2) 0.0228(19) -0.0036(17) -0.0040(16) 0.0108(19) 
C26 0.026(2) 0.039(2) 0.0228(19) -0.0021(17) 0.0004(16) 0.0057(18) 
C27 0.024(2) 0.076(4) 0.066(3) 0.005(3) -0.008(2) -0.006(2) 
C28 0.054(3) 0.068(3) 0.028(2) 0.009(2) -0.004(2) 0.014(3) 
C29 0.0216(19) 0.024(2) 0.0187(18) 0.0003(15) 0.0041(14) -0.0048(16) 
C30 0.026(2) 0.032(2) 0.0231(19) -0.0020(17) 0.0024(16) 0.0030(17) 
C31 0.040(2) 0.040(3) 0.030(2) -0.0139(19) 0.0086(19) 0.005(2) 
C32 0.044(3) 0.051(3) 0.020(2) -0.0118(19) 0.0018(18) -0.005(2) 
C33 0.042(3) 0.040(3) 0.024(2) 0.0003(18) -0.0070(18) 0.005(2) 
C34 0.032(2) 0.032(2) 0.0200(19) -0.0022(16) 0.0018(16) 0.0080(18) 
C35 0.027(2) 0.015(2) 0.046(2) -0.0053(17) 0.0073(18) 0.0015(16) 
C36 0.044(3) 0.025(2) 0.042(2) -0.0035(19) 0.013(2) 0.004(2) 
C37 0.043(3) 0.027(2) 0.058(3) -0.005(2) 0.023(2) 0.000(2) 
C38 0.029(2) 0.030(2) 0.068(3) -0.011(2) 0.008(2) -0.005(2) 
C39 0.033(2) 0.025(2) 0.048(3) -0.0043(19) 0.0008(19) 0.0022(19) 
C40 0.028(2) 0.025(2) 0.045(2) 0.0018(18) 0.0050(18) 0.0003(18) 
C41 0.067(4) 0.064(4) 0.082(4) 0.005(3) 0.028(3) -0.010(3) 
C42 0.052(3) 0.054(3) 0.066(3) 0.000(3) -0.009(3) -0.014(3) 
C43 0.030(2) 0.030(2) 0.043(2) -0.0118(19) -0.0041(19) 0.0112(19) 
C44 0.034(2) 0.034(2) 0.047(3) -0.014(2) -0.004(2) 0.003(2) 
C45 0.035(3) 0.047(3) 0.067(3) -0.026(2) 0.003(2) 0.011(2) 
C46 0.030(2) 0.064(3) 0.066(3) -0.029(3) -0.005(2) 0.014(2) 
C47 0.041(3) 0.057(3) 0.060(3) -0.017(3) -0.016(2) 0.023(2) 
C48 0.038(3) 0.043(3) 0.046(3) -0.011(2) -0.005(2) 0.022(2) 
C49 0.059(3) 0.036(3) 0.068(3) 0.018(2) 0.011(3) 0.019(2) 
C50 0.091(4) 0.060(4) 0.052(3) 0.025(3) 0.002(3) 0.022(3) 
C51 0.105(5) 0.040(4) 0.137(6) 0.030(4) 0.037(5) 0.015(3) 
C52 0.059(3) 0.039(3) 0.079(4) -0.018(3) 0.007(3) 0.015(3) 
C53 0.056(4) 0.074(4) 0.106(5) -0.051(4) -0.011(3) 0.024(3) 
C54 0.064(4) 0.092(5) 0.100(5) -0.044(4) -0.022(3) 0.032(4) 
C55 0.029(2) 0.031(2) 0.032(2) -0.0080(18) -0.0019(17) -0.0010(18) 
C56 0.030(2) 0.049(3) 0.045(3) -0.012(2) -0.0091(19) 0.001(2) 
C57 0.040(3) 0.042(3) 0.065(3) -0.025(2) -0.002(2) -0.004(2) 
C58 0.040(2) 0.041(3) 0.0183(19) -0.0005(17) 0.0023(17) 0.008(2) 
C59 0.053(3) 0.068(3) 0.024(2) 0.007(2) -0.006(2) 0.006(3) 
C60 0.042(3) 0.044(3) 0.028(2) 0.0098(19) 0.0067(18) 0.002(2) 
C61 0.0166(18) 0.028(2) 0.032(2) 0.0001(17) 0.0017(15) 0.0006(16) 
C62 0.018(2) 0.041(3) 0.043(2) 0.002(2) -0.0062(17) -0.0025(18) 
C63 0.022(2) 0.039(3) 0.051(3) 0.009(2) 0.0120(18) -0.0047(19) 
C64 0.0194(19) 0.027(2) 0.0213(18) -0.0005(15) 0.0038(14) -0.0006(16) 
C65 0.040(2) 0.039(3) 0.024(2) 0.0014(18) 0.0114(17) 0.005(2) 
C66 0.039(2) 0.031(2) 0.032(2) -0.0014(18) 0.0074(18) 0.0106(19) 
C67 0.0211(19) 0.0189(19) 0.0159(17) -0.0015(14) -0.0055(14) -0.0002(15) 
C68 0.026(2) 0.024(2) 0.0218(18) -0.0002(15) -0.0020(15) 0.0019(17) 
C69 0.035(2) 0.022(2) 0.036(2) -0.0021(17) -0.0092(18) 0.0014(18) 
C70 0.041(3) 0.024(2) 0.046(3) 0.0095(19) -0.011(2) -0.013(2) 
C71 0.028(2) 0.039(3) 0.045(2) 0.011(2) 0.0035(19) -0.009(2) 
C72 0.025(2) 0.029(2) 0.033(2) 0.0053(17) 0.0066(17) 0.0009(17) 
C73 0.0142(17) 0.024(2) 0.0260(19) 0.0044(16) 0.0081(14) 0.0027(15) 
C74 0.023(2) 0.030(2) 0.0239(19) 0.0054(16) 0.0034(15) 0.0018(17) 
C75 0.034(2) 0.044(3) 0.028(2) 0.0130(19) 0.0162(18) 0.010(2) 
C76 0.034(2) 0.026(2) 0.045(2) 0.0133(19) 0.0194(19) 0.0011(19) 
C77 0.030(2) 0.029(2) 0.041(2) 0.0047(19) 0.0112(18) 0.0000(18) 
C78 0.024(2) 0.027(2) 0.029(2) 0.0036(17) 0.0074(16) 0.0003(17) 
C79 0.065(3) 0.048(3) 0.028(2) 0.015(2) 0.011(2) 0.014(2) 
C80 0.071(4) 0.032(3) 0.062(3) 0.003(2) 0.012(3) -0.008(3) 
C81 0.0198(19) 0.022(2) 0.0235(18) -0.0046(15) 0.0002(15) -0.0002(16) 
C82 0.023(2) 0.022(2) 0.030(2) 0.0014(16) 0.0050(16) 0.0013(16) 
C83 0.024(2) 0.027(2) 0.038(2) -0.0095(18) 0.0101(17) 0.0004(17) 
C84 0.024(2) 0.021(2) 0.048(3) -0.0035(18) -0.0011(18) 0.0062(17) 
C85 0.026(2) 0.022(2) 0.038(2) 0.0047(17) -0.0018(17) -0.0005(17) 
C86 0.0204(19) 0.025(2) 0.0265(19) -0.0013(16) 0.0028(15) 0.0010(16) 
C87 0.039(3) 0.037(3) 0.057(3) -0.015(2) 0.019(2) 0.002(2) 
C88 0.047(3) 0.025(2) 0.045(3) 0.0110(19) 0.000(2) 0.004(2) 
C89 0.0137(17) 0.025(2) 0.0235(18) -0.0074(16) -0.0014(14) -0.0011(15) 
C90 0.026(2) 0.021(2) 0.028(2) -0.0052(16) -0.0001(16) -0.0002(16) 
C91 0.030(2) 0.039(3) 0.028(2) -0.0033(18) 0.0092(17) -0.012(2) 
C92 0.020(2) 0.040(3) 0.036(2) -0.0143(19) 0.0056(17) -0.0001(19) 
C93 0.027(2) 0.030(2) 0.042(2) -0.0084(19) 0.0009(18) 0.0080(18) 
C94 0.023(2) 0.028(2) 0.0231(19) -0.0021(16) -0.0001(15) 0.0055(17) 
C95 0.0191(18) 0.031(2) 0.0161(17) -0.0023(15) 0.0005(14) -0.0022(17) 
C96 0.029(2) 0.033(2) 0.0192(18) 0.0003(16) 0.0020(16) -0.0053(18) 
C97 0.034(2) 0.047(3) 0.0193(19) -0.0071(18) 0.0041(16) -0.012(2) 
C98 0.034(2) 0.047(3) 0.026(2) -0.0170(19) 0.0092(17) -0.005(2) 
C99 0.028(2) 0.033(2) 0.028(2) -0.0100(17) 0.0032(17) -0.0014(18) 
C100 0.0184(19) 0.032(2) 0.0220(18) -0.0050(16) -0.0020(15) 0.0005(17) 
C101 0.065(3) 0.069(3) 0.022(2) -0.005(2) 0.010(2) -0.025(3) 
C102 0.039(3) 0.043(3) 0.046(3) -0.014(2) 0.005(2) 0.002(2) 
C103 0.024(2) 0.034(2) 0.026(2) 0.0036(17) -0.0025(16) 0.0096(18) 
C104 0.050(3) 0.035(3) 0.033(2) 0.0093(19) -0.002(2) 0.007(2) 
C105 0.046(3) 0.051(3) 0.025(2) 0.007(2) -0.0105(19) 0.007(2) 
C106 0.0201(19) 0.030(2) 0.0254(19) -0.0076(16) 0.0001(15) -0.0013(17) 
C107 0.019(2) 0.047(3) 0.045(2) -0.010(2) -0.0006(18) -0.0064(19) 
C108 0.026(2) 0.031(2) 0.045(2) -0.0038(19) 0.0037(18) -0.0061(18) 

_refine_ls_extinction_method 
    'None'
_oxford_refine_ls_scale 0.039354(3) 
loop_
 _geom_bond_atom_site_label_1
 _geom_bond_site_symmetry_1
 _geom_bond_atom_site_label_2
 _geom_bond_site_symmetry_2
 _geom_bond_distance
 _geom_bond_publ_flag
Co1 . Ti1 . 2.8119(8)    yes
Co1 . P1 . 2.2787(10)    yes
Co1 . P2 . 2.2728(11)    yes
Co1 . N3 . 1.958(3)    yes
Co1 . N11 . 1.891(3)    yes
Co2 . Ti2 . 2.8043(7)    yes
Co2 . P4 . 2.2828(10)    yes
Co2 . P5 . 2.2672(10)    yes
Co2 . N6 . 1.953(3)    yes
Co2 . N12 . 1.898(3)    yes
Ti1 . P1 . 3.0193(11)    yes
Ti1 . P2 . 3.0965(12)    yes
Ti1 . P3 . 2.8625(13)    yes
Ti1 . N1 . 2.013(3)    yes
Ti1 . N2 . 2.081(3)    yes
Ti1 . N3 . 1.838(3)    yes
Ti1 . N4 . 2.151(3)    yes
Ti1 . N5 . 2.145(3)    yes
Ti2 . P4 . 3.0433(10)    yes
Ti2 . P5 . 3.0366(11)    yes
Ti2 . P6 . 2.8677(10)    yes
Ti2 . N6 . 1.819(3)    yes
Ti2 . N7 . 2.044(3)    yes
Ti2 . N8 . 2.048(3)    yes
Ti2 . N9 . 2.143(3)    yes
Ti2 . N10 . 2.155(3)    yes
P1 . N1 . 1.682(3)    yes
P1 . C1 . 1.849(4)    yes
P1 . C4 . 1.867(4)    yes
P2 . N2 . 1.686(3)    yes
P2 . C7 . 1.856(4)    yes
P2 . C10 . 1.876(4)    yes
P3 . N4 . 1.603(3)    yes
P3 . N5 . 1.603(4)    yes
P3 . C49 . 1.832(5)    yes
P3 . C52 . 1.845(5)    yes
P4 . N8 . 1.686(3)    yes
P4 . C55 . 1.859(4)    yes
P4 . C58 . 1.869(4)    yes
P5 . N7 . 1.683(3)    yes
P5 . C61 . 1.851(4)    yes
P5 . C64 . 1.859(4)    yes
P6 . N9 . 1.616(3)    yes
P6 . N10 . 1.610(3)    yes
P6 . C103 . 1.826(4)    yes
P6 . C106 . 1.821(4)    yes
N1 . C13 . 1.428(4)    yes
N2 . C21 . 1.421(4)    yes
N3 . C29 . 1.391(4)    yes
N4 . C35 . 1.421(5)    yes
N5 . C43 . 1.432(5)    yes
N6 . C67 . 1.398(4)    yes
N7 . C73 . 1.429(4)    yes
N8 . C81 . 1.423(4)    yes
N9 . C89 . 1.427(4)    yes
N10 . C95 . 1.411(4)    yes
N11 . N12 . 1.065(4)    yes
C1 . C2 . 1.532(5)    yes
C1 . C3 . 1.528(5)    yes
C1 . H11 . 0.980    no
C2 . H21 . 0.970    no
C2 . H22 . 0.968    no
C2 . H23 . 0.966    no
C3 . H31 . 0.970    no
C3 . H32 . 0.968    no
C3 . H33 . 0.961    no
C4 . C501 . 1.440(8)    yes
C4 . C601 . 1.541(10)    yes
C4 . H42 . 1.124    no
C4 . C502 . 1.591(12)    yes
C4 . C602 . 1.392(11)    yes
C4 . H41 . 0.965    no
C7 . C801 . 1.468(10)    yes
C7 . C901 . 1.478(11)    yes
C7 . H71 . 0.950    no
C7 . C802 . 1.472(11)    yes
C7 . C902 . 1.633(10)    yes
C7 . H72 . 0.950    no
C10 . C11 . 1.518(6)    yes
C10 . C12 . 1.503(6)    yes
C10 . H101 . 0.984    no
C11 . H111 . 0.963    no
C11 . H112 . 0.960    no
C11 . H113 . 0.966    no
C12 . H121 . 0.968    no
C12 . H122 . 0.970    no
C12 . H123 . 0.978    no
C13 . C14 . 1.392(5)    yes
C13 . C18 . 1.379(5)    yes
C14 . C15 . 1.387(5)    yes
C14 . H141 . 0.935    no
C15 . C16 . 1.392(6)    yes
C15 . C19 . 1.508(6)    yes
C16 . C17 . 1.370(5)    yes
C16 . H161 . 0.944    no
C17 . C18 . 1.395(5)    yes
C17 . C20 . 1.507(6)    yes
C18 . H181 . 0.938    no
C19 . H191 . 0.969    no
C19 . H192 . 0.974    no
C19 . H193 . 0.976    no
C20 . H201 . 0.961    no
C20 . H202 . 0.966    no
C20 . H203 . 0.951    no
C21 . C22 . 1.386(5)    yes
C21 . C26 . 1.391(5)    yes
C22 . C23 . 1.398(5)    yes
C22 . H221 . 0.930    no
C23 . C24 . 1.385(6)    yes
C23 . C27 . 1.506(6)    yes
C24 . C25 . 1.387(6)    yes
C24 . H241 . 0.928    no
C25 . C26 . 1.381(5)    yes
C25 . C28 . 1.512(5)    yes
C26 . H261 . 0.931    no
C27 . H271 . 0.960    no
C27 . H272 . 0.960    no
C27 . H273 . 0.963    no
C28 . H281 . 0.964    no
C28 . H282 . 0.951    no
C28 . H283 . 0.953    no
C29 . C30 . 1.400(5)    yes
C29 . C34 . 1.396(5)    yes
C30 . C31 . 1.383(5)    yes
C30 . H301 . 0.944    no
C31 . C32 . 1.370(6)    yes
C31 . H311 . 0.940    no
C32 . C33 . 1.375(6)    yes
C32 . H321 . 0.926    no
C33 . C34 . 1.382(5)    yes
C33 . H331 . 0.935    no
C34 . H341 . 0.927    no
C35 . C36 . 1.396(5)    yes
C35 . C40 . 1.384(5)    yes
C36 . C37 . 1.382(6)    yes
C36 . H361 . 0.920    no
C37 . C38 . 1.373(6)    yes
C37 . C41 . 1.524(6)    yes
C38 . C39 . 1.389(6)    yes
C38 . H381 . 0.935    no
C39 . C40 . 1.378(5)    yes
C39 . C42 . 1.472(6)    yes
C40 . H401 . 0.921    no
C41 . H411 . 0.990    no
C41 . H412 . 0.978    no
C41 . H413 . 0.980    no
C42 . H421 . 0.971    no
C42 . H422 . 0.975    no
C42 . H423 . 0.977    no
C43 . C44 . 1.363(6)    yes
C43 . C48 . 1.390(6)    yes
C44 . C45 . 1.406(6)    yes
C44 . H441 . 0.937    no
C45 . C46 . 1.367(7)    yes
C45 . H451 . 0.995    no
C46 . C47 . 1.377(7)    yes
C46 . H461 . 0.932    no
C47 . C48 . 1.383(6)    yes
C47 . H471 . 0.975    no
C48 . H481 . 0.936    no
C49 . C50 . 1.554(7)    yes
C49 . C51 . 1.538(8)    yes
C49 . H491 . 1.009    no
C50 . H501 . 0.973    no
C50 . H502 . 0.973    no
C50 . H503 . 0.971    no
C51 . H511 . 0.969    no
C51 . H512 . 0.979    no
C51 . H513 . 0.989    no
C52 . C53 . 1.557(7)    yes
C52 . C54 . 1.457(7)    yes
C52 . H521 . 0.994    no
C53 . H531 . 0.977    no
C53 . H532 . 0.982    no
C53 . H533 . 0.988    no
C54 . H541 . 0.964    no
C54 . H542 . 0.965    no
C54 . H543 . 0.962    no
C55 . C56 . 1.537(5)    yes
C55 . C57 . 1.526(5)    yes
C55 . H551 . 0.967    no
C56 . H561 . 0.965    no
C56 . H562 . 0.976    no
C56 . H563 . 0.966    no
C57 . H571 . 0.973    no
C57 . H572 . 0.964    no
C57 . H573 . 0.946    no
C58 . C59 . 1.517(5)    yes
C58 . C60 . 1.527(6)    yes
C58 . H581 . 0.974    no
C59 . H591 . 0.964    no
C59 . H592 . 0.961    no
C59 . H593 . 0.953    no
C60 . H601 . 0.969    no
C60 . H602 . 0.974    no
C60 . H603 . 0.962    no
C61 . C62 . 1.537(5)    yes
C61 . C63 . 1.527(5)    yes
C61 . H611 . 0.977    no
C62 . H621 . 0.955    no
C62 . H622 . 0.961    no
C62 . H623 . 0.962    no
C63 . H631 . 0.960    no
C63 . H632 . 0.956    no
C63 . H633 . 0.962    no
C64 . C65 . 1.533(5)    yes
C64 . C66 . 1.529(5)    yes
C64 . H641 . 0.971    no
C65 . H651 . 0.952    no
C65 . H652 . 0.961    no
C65 . H653 . 0.962    no
C66 . H661 . 0.957    no
C66 . H662 . 0.955    no
C66 . H663 . 0.958    no
C67 . C68 . 1.393(5)    yes
[truncated: 31,113 more chars]
